# Supplementary material for: Novel candidate loci for morpho-agronomic and seed quality traits detected by targeted genotyping-by-sequencing in common bean
Source: Front Plant Sci. 2022 Nov 10;13:1014282. doi: 10.3389/fpls.2022.1014282 (PMC9685177; doi:10.3389/fpls.2022.1014282)
Supplement: Supplementary file 2 [file DataSheet_2.xlsx]

## Sheet: Table_S1
Supplementary Table S1 Genotype names and sources for the global diversity panel. Genotypes highlighted in red were not used in the study
Number in Figure 1	Genotype name	Seed source	Cultivar name	Subspecies	Country of origin	Acquisition date	Passport doi or publication doi	ID (from Raatz et al., 2019)	alternative name	Pedigree	Seed Source	country code	Gerplasm Origin	TRAITS	Uses	Countries where released	Growth habit	Size	major seed color	color according to CIAT information (1 white, 2 cream, 5 pink, 6 red, 7 purple) primary and secondary color comma separated
1	NCB1	Market/farmers, Nigeria			Nigeria	2019
2	NCB2	Market/farmers, Nigeria			Nigeria	2019
3	NCB3	Market/farmers, Nigeria			Nigeria	2019
4	NCB4	Market/farmers, Nigeria			Nigeria	2019
5	NCB5	Market/farmers, Nigeria			Nigeria	2019
6	NCB6	Market/farmers, Nigeria			Nigeria	2019
7	NCB7	Market/farmers, Nigeria			Nigeria	2019
8	NCB8	Market/farmers, Nigeria			Nigeria	2019
9	NCB9	Market/farmers, Nigeria			Nigeria	2019
10	NCB10	Market/farmers, Nigeria			Nigeria	2019
11	NCB11	Market/farmers, Nigeria			Nigeria	2019
12	NCB12	Market/farmers, Nigeria			Nigeria	2019
13	NCB13	Market/farmers, Nigeria			Nigeria	2019
14	NCB14	Market/farmers, Nigeria			Nigeria	2019
15	NCB15	Market/farmers, Nigeria			Nigeria	2019
16	NCB16	Market/farmers, Nigeria			Nigeria	2019
17	NCB17	Market/farmers, Nigeria			Nigeria	2019
18	NCB18	Market/farmers, Nigeria			Nigeria	2019
19	NCB19	Market/farmers, Nigeria			Nigeria	2019
20	A222	CIAT			Uganda		10.1007/s10722-019-00746-0	A 222			CIAT-Uganda	UG	CIAT	ALS, LSF	food/market	Mozambique	Bush	Small	Brown
21	A286	CIAT			Uganda		10.1007/s10722-019-00746-0	A 286	MKHUZI, KAMBIDZI		CIAT-Uganda	UG	CIAT	ALS, LSF, Rust	food/market	SOUTHAFRICA, LESOTHO, Malawi, ANGOLA	Bush	Medium	Brown/Maroon
22	AB136	CIAT			Uganda		10.1007/s10722-019-00746-0	AB 136			CIAT-Uganda	UG	CIAT	anthracnose	food/market		Climber	Small	Red
23	ALB213	CIAT			Colombia		10.1007/s10722-019-00746-0	ALB 213			CIAT-Colombia	CO	CIAT	Aluminum tolerance	Breeding line		Bush	Small	Red
24	ALB67	CIAT			Colombia		10.1007/s10722-019-00746-0	ALB 67			CIAT-Colombia	CO	CIAT	Aluminum tolerance	Breeding line		Bush	Small	Red
25	ALB123	CIAT			Colombia		10.1007/s10722-019-00746-0	ALB123_30ciat			CIAT-Colombia	CO	CIAT	Aluminum tolerance	Breeding line		Bush	Small	Red
26	ALB21	CIAT			Colombia		10.1007/s10722-019-00746-0	ALB21_30ciat			CIAT-Colombia	CO	CIAT	Root rot resistance	Breeding line		Bush	Small	Red
27	AMENDOIN	CIAT			Uganda		10.1007/s10722-019-00746-0	AMENDOIN			CIAT-Uganda	UG	CIAT	ALS	Breeding line		Bush	Large	Red
28	AND277	CIAT			Uganda		10.1007/s10722-019-00746-0	AND 277			CIAT-Uganda	UG	CIAT	ALS	Breeding line
29	AND620	CIAT			Uganda		10.1007/s10722-019-00746-0	AND 620	MUDUKU		CIAT-Uganda	UG	CIAT	CBB, ALS	food/market	DRC	Bush	Large	Purple
30	BALONBAYO	CIAT			Uganda		10.1007/s10722-019-00746-0	BALONBAYO			CIAT-Uganda	UG	CIAT	ALS	Breeding line			Medium	Cream
31	BAT332	CIAT			Uganda		10.1007/s10722-019-00746-0	BAT 332			CIAT-Uganda	UG	CIAT	ALS	Breeding line		Bush	Small	Cream
32	BAT477	CIAT			Colombia		10.1007/s10722-019-00746-0	BAT477			CIAT-Colombia	CO	CIAT	N2	Breeding line		Bush	Small	Cream
33	BFS10	CIAT			Colombia		10.1007/s10722-019-00746-0	BFS 10			CIAT-Colombia	CO	CIAT	Drought and LSF	Breeding line		Bush	Small	Red
34	BFS32	CIAT			Colombia		10.1007/s10722-019-00746-0	BFS 32			CIAT-Colombia	CO	CIAT	Drought and LSF	Breeding line		Bush	Small	Red
35	BFS39	CIAT			Colombia		10.1007/s10722-019-00746-0	BFS 39			CIAT-Colombia	CO	CIAT	Drought and LSF	Breeding line		Bush	Small	Red
36	BRB191	CIAT			Colombia		10.1007/s10722-019-00746-0	BRB191_30ciat			CIAT-Colombia	CO	CIAT	BCMV (bc-3)	Breeding line
37	G21212	CIAT			Uganda		10.1007/s10722-019-00746-0	G21212			CIAT-Colombia	CO	CIAT	BSM
38	G2858	CIAT			Colombia		10.1007/s10722-019-00746-0	G 2858	MAHARAGI SOJA		CIAT-Colombia	CO	CIAT	BLB, Rust, WB, BCMV		DRC	Bush	Small	Cream
39	G5686	CIAT			Uganda		10.1007/s10722-019-00746-0	G 5686			CIAT-Uganda	UG	CIAT	ALS
40	G2333	CIAT			Colombia		10.1007/s10722-019-00746-0	G2333	ALIYA, UMUBANO, LYAMUNGU 85		CIAT-Colombia	CO	CIAT	Anthracnose		DRC, Rwanda, Kenya	Climber	Small	Red
41	GASIRIDA	CIAT			Uganda		10.1007/s10722-019-00746-0	GASIRIDA			CIAT-Uganda	UG	CIAT	Yield		Burundi, Rwanda	Climber	Small	Red
42	GITANGA	CIAT			Uganda		10.1007/s10722-019-00746-0	GITANGA			CIAT-Uganda	UG	CIAT	high Fe
43	GLORIA	CIAT			Zimbabwe		10.1007/s10722-019-00746-0	GLORIA_30_TS	PC652-SS3		Zimbabwe	ZW	CIAT	Bruchids	Market	ZIMBABWE	Bush	Large	Cream
44	GLP2	CIAT			Uganda		10.1007/s10722-019-00746-0	GLP 2	MIRUNDI				CIAT		Released Variety	DRC, Burundi	Bush	Large	Red
45	GOFTA	CIAT			Ethiopia		10.1007/s10722-019-00746-0	GOFTA	EX-AFBYAN		EIAR-Ethiopia	ET	CIAT	high Fe	Released Variety	Ethiopia	Climber	medium	Cream
46	HM21-7	CIAT			Unknown		10.1007/s10722-019-00746-0	HM 21-7	SEPE				CIAT	MCR, High Fe	Released Variety	DRC	Bush	Medium	Brown
47	Kabulangeti	CIAT			Uganda		10.1007/s10722-019-00746-0	Kabulangeti	ADP-74		CIAT-Uganda	UG		Drought, ALS, CBB	Released Variety	Tanzania, DRC, Zambia	Climber	Medium	Purple
48	KATB1	CIAT			Uganda		10.1007/s10722-019-00746-0	KAT B1	MBUNDUGURU, Ada		CIAT-Uganda	UG		Drought, CBB	Market	Burundi, Ethiopia, Kenya
49	KIANGALA	CIAT			Uganda		10.1007/s10722-019-00746-0	KIANGALA			CIAT-Uganda	UG		high Fe&Zn	Nutrition, Released variety	DRC, Burundi	Climber	Medium	Brown
50	MAB351	CIAT			Colombia		10.1007/s10722-019-00746-0	MAB351_30ciat			CIAT-Colombia	CO	CIAT	ALS	Breeding line
51	MAB352	CIAT			Colombia		10.1007/s10722-019-00746-0	MAB352_30ciat			CIAT-Colombia	CO	CIAT	ALS	Breeding line
52	MAB353	CIAT			Colombia		10.1007/s10722-019-00746-0	MAB353_30ciat			CIAT-Colombia	CO	CIAT	ALS	Breeding line
53	MAB354	CIAT			Colombia		10.1007/s10722-019-00746-0	MAB354_30ciat			CIAT-Colombia	CO	CIAT	ALS	Breeding line
54	MAC42	CIAT			Uganda		10.1007/s10722-019-00746-0	MAC42			CIAT-Uganda	UG	CIAT	high Fe, Drought tolerant	Released Variety	Rwanda	Climber	Large	Sugar bean
55	MAHARAGWESOJA	CIAT			Unknown		10.1007/s10722-019-00746-0	MAHARAGWESOJA					CIAT	high Fe	Released Variety	DRC	Bush	Small	Cream
56	MAR001	CIAT			Colombia		10.1007/s10722-019-00746-0	MAR1_30ciat			CIAT-Colombia	CO	CIAT	ALS
57	MAZ154	CIAT			Zimbabwe		10.1007/s10722-019-00746-0	MAZ154_30_TS		SEQ1003 x RAZ170	Zimbabwe	ZW	CIAT	Bruchids	Breeding line		Bush	large	Red
58	MAZ155	CIAT			Zimbabwe		10.1007/s10722-019-00746-0	MAZ155_30_TS		SEQ1003 x RAZ170	Zimbabwe	ZW	CIAT	Bruchids	Breeding line		Bush	large	Red
59	MAZ156	CIAT			Zimbabwe		10.1007/s10722-019-00746-0	MAZ156_30_TS		SEQ1027 x RAZ104	Zimbabwe	ZW	CIAT	Bruchids	Breeding line		Bush	large	Red
60	MAZ157	CIAT			Zimbabwe		10.1007/s10722-019-00746-0	MAZ157_30_TS		SEQ1027 x RAZ104	Zimbabwe	ZW	CIAT	Bruchids	Breeding line		Bush	large	Red
61	MAZ158	CIAT			Zimbabwe		10.1007/s10722-019-00746-0	MAZ158_30_TS		BRB211 x RAZ170	Zimbabwe	ZW	CIAT	Bruchids	Breeding line		Bush	large	Red
62	MAZ159	CIAT			Zimbabwe		10.1007/s10722-019-00746-0	MAZ159_30_TS		BRB211 x RAZ170	Zimbabwe	ZW	CIAT	Bruchids	Breeding line		Bush	medium	Red
63	MAZ160	CIAT			Zimbabwe		10.1007/s10722-019-00746-0	MAZ160_30_TS		BRB211 x RAZ170	Zimbabwe	ZW	CIAT	Bruchids	Breeding line		Bush	Large	Red
64	MAZ161	CIAT			Zimbabwe		10.1007/s10722-019-00746-0	MAZ161_30_TS		BRB211 x RAZ170	Zimbabwe	ZW	CIAT	Bruchids	Breeding line		Bush	Large	Red
65	MAZ162	CIAT			Zimbabwe		10.1007/s10722-019-00746-0	MAZ162_30_TS		BRB211 x RAZ170	Zimbabwe	ZW	CIAT	Bruchids	Breeding line		Bush	Medium	Red
66	MAZ163	CIAT			Zimbabwe		10.1007/s10722-019-00746-0	MAZ163_30_TS		BRB211 x RAZ169	Zimbabwe	ZW	CIAT	Bruchids	Breeding line		Bush	Large	Red
67	MAZ165	CIAT			Zimbabwe		10.1007/s10722-019-00746-0	MAZ165_30_TS		BRB211 x RAZ169	Zimbabwe	ZW	CIAT	Bruchids	Breeding line		Bush	Large	Red
68	MAZ166	CIAT			Zimbabwe		10.1007/s10722-019-00746-0	MAZ166_30_TS		BRB211 x RAZ169	Zimbabwe	ZW	CIAT	Bruchids	Breeding line		Bush	Large	Red
69	MAZ167	CIAT			Zimbabwe		10.1007/s10722-019-00746-0	MAZ167_30_TS		BRB211 x RAZ169	Zimbabwe	ZW	CIAT	Bruchids	Breeding line		Bush	Large	Red	6
70	MAZ168	CIAT			Zimbabwe		10.1007/s10722-019-00746-0	MAZ168_30_TS		BRB211 x RAZ169	Zimbabwe	ZW	CIAT	Bruchids	Breeding line		Bush	Large	Red	6
71	MAZ169	CIAT			Zimbabwe		10.1007/s10722-019-00746-0	MAZ169_30_TS		BRB211 x RAZ169	Zimbabwe	ZW	CIAT	Bruchids	Breeding line		Bush	Large	Red	6
72	MAZ170	CIAT			Zimbabwe		10.1007/s10722-019-00746-0	MAZ170_30_TS		RMA71 x RAZ105	Zimbabwe	ZW	CIAT	Bruchids	Breeding line		Bush	Large	Red	6
73	MAZ171	CIAT			Zimbabwe		10.1007/s10722-019-00746-0	MAZ171_30_TS		RMA71 x RAZ105	Zimbabwe	ZW	CIAT	Bruchids	Breeding line		Bush	Large	Red
74	MBC26	CIAT			Colombia		10.1007/s10722-019-00746-0	MBC26			CIAT-Colombia	CO	CIAT	Yield	Breeding line		Climber	Small	red	6, 5
75	MBC36	CIAT			Colombia		10.1007/s10722-019-00746-0	MBC36			CIAT-Colombia	CO	CIAT	Yield			Climber	Medium	Red	6, 5
76	MBC40	CIAT			Colombia		10.1007/s10722-019-00746-0	MBC40			CIAT-Colombia	CO	CIAT	Yield			Climber	Medium	Red	6
77	MBC46	CIAT			Colombia		10.1007/s10722-019-00746-0	MBC46			CIAT-Colombia	CO	CIAT	Yield			Climber	medium	red	6
78	MCM1015	CIAT			Uganda		10.1007/s10722-019-00746-0	MCM1015	NABE2		CIAT-Colombia	CO	CIAT	BCMV	Breeding line	Uganda	Bush	Small	Black	6, 2
79	MCM2001	CIAT			Uganda		10.1007/s10722-019-00746-0	MCM 2001	NABE3		CIAT-Uganda	UG	CIAT	BCMV	Breeding line	Uganda	Bush	Small	red	7, 2
80	MCM5001	CIAT			Uganda		10.1007/s10722-019-00746-0	MCM 5001	IRIS		CIAT-Uganda	UG	CIAT	BCMV	Breeding line	Zimbabwe	Bush	Small	cream	7, 2
81	MNC257	CIAT			Colombia		10.1007/s10722-019-00746-0	MNC257			CIAT-Colombia	CO	CIAT	High Minerals	Breeding line		Semi Climber	Large	Cream	6, 2
82	MNC358	CIAT			Colombia		10.1007/s10722-019-00746-0	MNC358			CIAT-Colombia	CO	CIAT	High Minerals	Breeding line		Climber			5
83	MONTCALM	CIAT			Uganda		10.1007/s10722-019-00746-0	MONTCALM	ACOS Red		CIAT-Uganda	UG	CIAT	ALS, CB, Rust	Breeding line	Ethiopia	Bush	Large	Red	6, 2
84	NABE15	CIAT			Unknown		10.1007/s10722-019-00746-0	NABE15			NaCRRI-Uganda	UG	CIAT	Anthracnose	Released Variety	Uganda	Bush	medium	Pink	6, 2
85	NABE16	CIAT			Uganda		10.1007/s10722-019-00746-0	NABE16			NaCRRI-Uganda	UG	CIAT	Anthracnose	Released Variety	Uganda	Bush	medium	Red	6, 2
86	NABE3	CIAT			Uganda		10.1007/s10722-019-00746-0	NABE3			NaCRRI-Uganda	UG	CIAT	BCMV	Released Variety	Uganda	Bush	Small	Red	6, 2
87	NUA35	CIAT			Colombia		10.1007/s10722-019-00746-0	NUA 35			CIAT-Colombia	CO	CIAT	High Minerals		DRC	Bush	large	red
88	NUA398	CIAT			Colombia		10.1007/s10722-019-00746-0	NUA 398			CIAT-Colombia	CO	CIAT	High Minerals	Breeding line		Bush
89	NUA457	CIAT			Colombia		10.1007/s10722-019-00746-0	NUA457_30ciat			CIAT-Colombia	CO	CIAT	High Minerals, ALS, CBB	Breeding line		Bush	Large	Red
90	NUA561	CIAT			Colombia		10.1007/s10722-019-00746-0	NUA561_30ciat			CIAT-Colombia	CO	CIAT	High Minerals	Breeding line		Bush	large	Red
91	NUC168	CIAT			Colombia		10.1007/s10722-019-00746-0	NUC168_30ciat			CIAT-Colombia	CO	CIAT	High Minerals	Breeding line		Climber	large
92	NUC177	CIAT			Colombia		10.1007/s10722-019-00746-0	NUC177			CIAT-Colombia	CO	CIAT	High Minerals	Breeding line		Climber	large
93	NUC342	CIAT			Colombia		10.1007/s10722-019-00746-0	NUC342			CIAT-Colombia	CO	CIAT	High Minerals	Breeding line		Climber	large
94	NUS7	CIAT			Colombia		10.1007/s10722-019-00746-0	NUS7_30ciat			CIAT-Colombia	CO	CIAT	High Minerals	Breeding line
95	RANJONOMBY	CIAT			Uganda		10.1007/s10722-019-00746-0	RANJONOMBY			CIAT-Uganda	UG	CIAT	Rust, ALS, Anthracnose	Released Variety	Madagascar	Bush	Large	White
96	ROBA1	CIAT			Uganda		10.1007/s10722-019-00746-0	ROBA1	Lundamba (DRC)		CIAT-Uganda	UG	CIAT	high Fe	Released Variety	DRC, Tanzania	Bush	Medium	Yellow
97	RWR2154	CIAT			Rwanda		10.1007/s10722-019-00746-0	RWR 2154			RWANDA	RW	Rwanda	ALS, High Fe	food/breeding line	Rwanda	Bush	large	Sugar
98	RWR2245	CIAT			Rwanda		10.1007/s10722-019-00746-0	RWR 2245			RWANDA	RW	Rwanda	ALS, High Fe	food/breeding line	Rwanda	Bush	Medium	Red
99	RWR719	CIAT			Rwanda		10.1007/s10722-019-00746-0	RWR 719			CIAT-Uganda	UG	Rwanda	Root rot	food/breeding line	Rwanda	Climber	Small	White
100	RWV1129	CIAT			Rwanda		10.1007/s10722-019-00746-0	RWV 1129	Uruvuzo		RWANDA	RW	Rwanda	BCMV, Root rot	food/breeding line	Rwanda	Climber	Large	Mwezimoja
101	SAB620	CIAT			Colombia		10.1007/s10722-019-00746-0	SAB 620			CIAT-Colombia	CO	CIAT	Drought	Breeding line		Bush
102	SAB622	CIAT			Uganda		10.1007/s10722-019-00746-0	SAB 622			CIAT-Uganda	UG	CIAT	Drought	Breeding line		Bush
103	SAB623	CIAT			Uganda		10.1007/s10722-019-00746-0	SAB 623			CIAT-Uganda	UG	CIAT	Drought	Breeding line		Bush
104	SAB626	CIAT			Colombia		10.1007/s10722-019-00746-0	SAB 626			CIAT-Uganda	UG	CIAT	Drought	Breeding line		Bush	Medium	white
105	SAB629	CIAT			Uganda		10.1007/s10722-019-00746-0	SAB 629			CIAT-Uganda	UG	CIAT	Drought	Breeding line		Bush
106	SAB630	CIAT			Uganda		10.1007/s10722-019-00746-0	SAB 630			CIAT-Uganda	UG	CIAT	Drought	Breeding line		Bush
107	SAB659	CIAT			Colombia		10.1007/s10722-019-00746-0	SAB 659			CIAT-Colombia	CO	CIAT	Drought	Breeding line		Bush
108	SAB686	CIAT			Uganda		10.1007/s10722-019-00746-0	SAB 686			CIAT-Uganda	UG	CIAT	Drought	Breeding line		Bush
109	SAB713	CIAT			Uganda		10.1007/s10722-019-00746-0	SAB 713			CIAT-Uganda	UG	CIAT	Drought	Breeding line		Bush
110	SAB712	CIAT			Uganda		10.1007/s10722-019-00746-0	SAB712			CIAT-Uganda	UG	CIAT	Drought	Breeding line		Bush
111	SEQ1003	CIAT			Colombia		10.1007/s10722-019-00746-0	SEQ1003			CIAT-Colombia	CO	CIAT	Drought Andean	Breeding line
112	SEQ1027	CIAT			Colombia		10.1007/s10722-019-00746-0	SEQ1027			CIAT-Colombia	CO	CIAT	Drought Andean	Breeding line
113	SER128	CIAT			Uganda		10.1007/s10722-019-00746-0	SER 128			CIAT-Uganda	UG	CIAT	Drought	Breeding line		Bush	small	Red
114	SER176	CIAT			Uganda		10.1007/s10722-019-00746-0	SER 176			CIAT-Uganda	UG	CIAT	Drought	Breeding line		Bush	medium	Red
115	SER82	CIAT			Uganda		10.1007/s10722-019-00746-0	SER 82			CIAT-Uganda	UG	CIAT	Drought	Breeding line
116	SER22	CIAT			Uganda		10.1007/s10722-019-00746-0	SER22			CIAT-Colombia	CO	CIAT	Drought	Breeding line					6
117	SER48	CIAT			Colombia		10.1007/s10722-019-00746-0	SER48			CIAT-Colombia	CO	CIAT	Drought	Breeding line					6
118	SMB17	CIAT			Colombia		10.1007/s10722-019-00746-0	SMB 17			CIAT-Colombia	CO	CIAT	Drought high minerals	Breeding line		Bush	small	Cream
119	SMR113	CIAT			Colombia		10.1007/s10722-019-00746-0	SMR113_30ciat			CIAT-Colombia	CO	CIAT	Drought red beans	Breeding line
120	SMR129	CIAT			Colombia		10.1007/s10722-019-00746-0	SMR129_30ciat			CIAT-Colombia	CO	CIAT	Drought red beans	Breeding line
121	SUG131	CIAT			Unknown		10.1007/s10722-019-00746-0	SUG131	Malepa (Mozambique), Golden stalite (Zimbabwe		CIAT-Colombia	CO	CIAT	BSM, BCMV, CBB, Anthracnose	Released Variety	Ethiopia, Swaziland, Lesotho, Mozambique, Zimbabwe	Bush	Large	White
122	SXB412	CIAT			Colombia		10.1007/s10722-019-00746-0	SXB 412			CIAT-Colombia	CO	CIAT	Drought	Breeding line
123	TO	CIAT			Uganda		10.1007/s10722-019-00746-0	TO			CIAT-Uganda	UG	CIAT	BCMV	Breeding line			medium	cream	6
124	TU	CIAT			Uganda		10.1007/s10722-019-00746-0	TU			CIAT-Uganda	UG	CIAT	BCMV	Breeding line			small	black	6
125	UBR_92_25	CIAT			Uganda		10.1007/s10722-019-00746-0	UBR (92)25	Napilira (malawi), magnum(Zimbabwe)		CIAT-Uganda	UG	CIAT	BCMV	Released Variety	Malawi, DRC, Zimbabwe	Bush	Medium	Red
126	UYOLE96	CIAT			Tanzania		10.1007/s10722-019-00746-0	UYOLE96	DRK, ADP112		Tanzania	TZ	Tanzania	ALS	Released Variety	Tanzania	Semi Climber	Large	Red
127	UYOLE98	CIAT			Tanzania		10.1007/s10722-019-00746-0	UYOLE98	ADP-111		Tanzania	TZ	Tanzania	Drought	Released Variety, market	Tanzania	Semi Climber	Medium	Orange
128	39	Van Waveren			Germany		10.1007/s10722-019-00746-0
129	64	Van Waveren			Germany		10.1007/s10722-019-00746-0
130	65	Van Waveren			Germany		10.1007/s10722-019-00746-0
131	99	Van Waveren			Germany		10.1007/s10722-019-00746-0
132	135	Van Waveren			Germany		10.1007/s10722-019-00746-0
133	153	Van Waveren			Germany		10.1007/s10722-019-00746-0
134	205	Van Waveren			Germany		10.1007/s10722-019-00746-0
135	177	Van Waveren			Germany		10.1007/s10722-019-00746-0
136	184	Van Waveren			Germany		10.1007/s10722-019-00746-0
137	213	Van Waveren			Germany		10.1007/s10722-019-00746-0
138	PHA1028	IPK	Stahn und Finke 3050	vulgaris var. nanus Asch	Germany	1955	10.25642/IPK/GBIS/52165
139	PHA1053	IPK	Enorma Weiß	vulgaris var. nanus Asch	Germany	1955	10.25642/IPK/GBIS/52190
140	PHA1054	IPK	Runde Weiße Kochbohne	vulgaris var. nanus Asch	Germany	1955	10.25642/IPK/GBIS/52191
141	PHA1058	IPK	Mignon	vulgaris var. nanus Asch	Germany	1962	10.25642/IPK/GBIS/52195
142	PHA1074	IPK	Berliner Markthallen	vulgaris var. nanus Asch	Germany	1955	10.25642/IPK/GBIS/52211
143	PHA1094	IPK	Harzer Flageolet	vulgaris var. nanus Asch	Germany	1955	10.25642/IPK/GBIS/52230
144	PHA1109	IPK	Schäfers Multima	vulgaris var. nanus Asch	Germany	1959	10.25642/IPK/GBIS/52245
145	PHA1110	IPK	Schäfers Unima	vulgaris var. nanus Asch	Germany	1959	10.25642/IPK/GBIS/52246
146	PHA1122	IPK	Grußdorfs Weiße Feld	vulgaris var. nanus Asch	Germany	1955	10.25642/IPK/GBIS/52258
147	PHA1124	IPK	Breustedt's Pallas	vulgaris var. nanus Asch	Germany	1963	10.25642/IPK/GBIS/52260
148	PHA1297	IPK	Eckendorfer Rotsprenkel	vulgaris var. nanus Asch	Germany	1955	10.25642/IPK/GBIS/52425
149	PHA1300	IPK	Herold	vulgaris var. nanus Asch	Germany	1956	10.25642/IPK/GBIS/52428
150	PHA1343	IPK	Erfurter Markt	vulgaris var. nanus Asch	Germany	1948	10.25642/IPK/GBIS/52471
151	PHA992	IPK	Hindenburg Treib	vulgaris var. nanus Asch	Germany	1955	10.25642/IPK/GBIS/54708
152	PHA14304	IPK	Daisy	vulgaris var. nanus Asch	Germany	2015	10.25642/IPK/GBIS/7194188
153	PHA6438	IPK	Judia	vulgaris var. vulgaris	Spain	1994	10.25642/IPK/GBIS/24330
154	PHA1780	IPK	Zabal	vulgaris var. vulgaris	Spain	1978	10.25642/IPK/GBIS/77407
155	PHA6880	IPK	Cara La Virgen de la Bañeza Leon	vulgaris var. vulgaris	Spain	1997	10.25642/IPK/GBIS/93370
156	PHA7133	IPK	Judia (span.)	vulgaris var. vulgaris	Spain	1999	10.25642/IPK/GBIS/96966
157	PHA7135	IPK	Mejorada	vulgaris var. nanus Asch	Spain	1999	10.25642/IPK/GBIS/97011
158	PHA887	IPK	Bobis	vulgaris var. vulgaris	Italy	1962	10.25642/IPK/GBIS/54609
159	PHA5851	IPK	Olandesi	vulgaris var. nanus Asch	Italy	1992	10.25642/IPK/GBIS/59153
160	PHA5854	IPK	Tondino bianco	vulgaris var. vulgaris	Italy	1994	10.25642/IPK/GBIS/59274
161	PHA5855	IPK	Tondino bianco	vulgaris var. vulgaris	Italy	1992	10.25642/IPK/GBIS/59275
162	PHA5876	IPK	Vaccarelle	vulgaris var. vulgaris	Italy	1994	10.25642/IPK/GBIS/59368
163	PHA1707	IPK		vulgaris var. nanus Asch	Poland	1979	10.25642/IPK/GBIS/65728
164	PHA1713	IPK		vulgaris var. nanus Asch	Poland	1979	10.25642/IPK/GBIS/65732
165	PHA1714	IPK		vulgaris var. nanus Asch	Poland	1979	10.25642/IPK/GBIS/65733
166	PHA1717	IPK		vulgaris var. nanus Asch	Poland	1979	10.25642/IPK/GBIS/65735
167	PHA1720	IPK		vulgaris var. nanus Asch	Poland	1979	10.25642/IPK/GBIS/65737
168	PHA1136	IPK	Budai piaci	vulgaris var. nanus Asch	Hungary	1963	10.25642/IPK/GBIS/52272
169	PHA1137	IPK	Javitott Aranyesö	vulgaris var. nanus Asch	Hungary	1963	10.25642/IPK/GBIS/52273
170	PHA1138	IPK	Kampfl-féle	vulgaris var. nanus Asch	Hungary	1963	10.25642/IPK/GBIS/52274
171	PHA1139	IPK	Kénbab	vulgaris var. nanus Asch	Hungary	1963	10.25642/IPK/GBIS/52275
172	PHA1140	IPK	Köbab	vulgaris var. vulgaris	Hungary	1963	10.25642/IPK/GBIS/52276
173	PHA12844	IPK	Soldier-bean	vulgaris var. nanus Asch	United States of America	2003	10.25642/IPK/GBIS/235069
174	PHA13193	IPK	Feijao Pintado	vulgaris var. vulgaris	Brazil	1976	10.25642/IPK/GBIS/65200
175	PHA13903	IPK	Feijao Rica 23	vulgaris var. nanus Asch	Brazil	1976	10.25642/IPK/GBIS/65196
176	PHA13904	IPK	Feijao Carioca	vulgaris var. nanus Asch	Brazil	1976	10.25642/IPK/GBIS/65197
177	PHA13906	IPK	Feijao Venezuela	vulgaris var. nanus Asch	Brazil	1976	10.25642/IPK/GBIS/65199
178	PHA13199	IPK	Kleine rode	vulgaris var. vulgaris	Brazil	1976	10.25642/IPK/GBIS/65257
179	PHA14021	IPK	Brasil 1289	vulgaris var. nanus Asch	Brazil	1976	10.25642/IPK/GBIS/65353
180	PHA13221	IPK	Brasil 1087	vulgaris var. vulgaris	Brazil	1976	10.25642/IPK/GBIS/65395
181	PHA14034	IPK	Brasil 1096	vulgaris var. nanus Asch	Brazil	1976	10.25642/IPK/GBIS/65366
182	PHA13947	IPK		vulgaris var. nanus Asch	Brazil	1976	10.25642/IPK/GBIS/65253
183	PHA13948	IPK		vulgaris var. nanus Asch	Brazil	1976	10.25642/IPK/GBIS/65254
184	PHA5060	IPK	Aquaruto	vulgaris var. nanus Asch	Mexico	1989	10.25642/IPK/GBIS/38742
185	PHA13577	IPK	Negro Veracruz	vulgaris var. nanus Asch	Mexico	1968	10.25642/IPK/GBIS/51792
186	PHA13580	IPK	Negro Mexicano	vulgaris var. nanus Asch	Mexico	1968	10.25642/IPK/GBIS/51796
187	PHA14051	IPK	Blanco	vulgaris var. nanus Asch	Mexico	1976	10.25642/IPK/GBIS/65393
188	PHA12178	IPK	Gartenbohne	vulgaris var. vulgaris	Mexico	2003	10.25642/IPK/GBIS/243929
189	PHA12402	IPK	Gartenbohne	vulgaris	Mexico	2003	10.25642/IPK/GBIS/252758
190	PHA13693	IPK	Mafiambosa	vulgaris var. nanus Asch	Zambia	1969	10.25642/IPK/GBIS/51960
191	PHA13694	IPK	Kapenta	vulgaris var. nanus Asch	Zambia	1969	10.25642/IPK/GBIS/51961
192	PHA13695	IPK	Local	vulgaris var. nanus Asch	Zambia	1969	10.25642/IPK/GBIS/51962
193	PHA13696	IPK	Local	vulgaris var. vulgaris	Zambia	1969	10.25642/IPK/GBIS/51963
194	PHA13697	IPK	Local	vulgaris var. vulgaris	Zambia	1969	10.25642/IPK/GBIS/51964
195	PHA13698	IPK	Local yellow	vulgaris var. vulgaris	Zambia	1969	10.25642/IPK/GBIS/51965
196	PHA13699	IPK	Borlotti	vulgaris var. vulgaris	Zambia	1969	10.25642/IPK/GBIS/51966
197	PHA13963	IPK	Line H 34-9	vulgaris var. nanus Asch	South Africa	1976	10.25642/IPK/GBIS/65275
198	PHA13964	IPK	Line 1157-4	vulgaris var. nanus Asch	South Africa	1976	10.25642/IPK/GBIS/65276
199	PHA13980	IPK	Negro Mecentrau	vulgaris var. nanus Asch	Ethiopia	1976	10.25642/IPK/GBIS/65298
200	PHA13981	IPK	Ethiopia red	vulgaris var. vulgaris	Ethiopia	1976	10.25642/IPK/GBIS/65299
201	PHA14013	IPK		vulgaris var. nanus Asch	Ethiopia	1976	10.25642/IPK/GBIS/65343
202	PHA1511	IPK	Nanzindo	vulgaris var. vulgaris	Zambia	1979	10.25642/IPK/GBIS/65540
203	PHA1029	IPK	Olomoucká Zelenoluska	vulgaris var. nanus Asch	Czech Republic	1956	10.25642/IPK/GBIS/52166
204	PHA1052	IPK	Zwaans Resistentia	vulgaris var. nanus Asch	Netherlands	1959	10.25642/IPK/GBIS/52189
205	PHA1072	IPK	Suisse Blanc	vulgaris var. nanus Asch	Switzerland	1955	10.25642/IPK/GBIS/52209
206	PHA1077	IPK	Roi de Belge	vulgaris var. nanus Asch	Belgium	1956	10.25642/IPK/GBIS/52214
207	PHA1092	IPK	Canadian wonder	vulgaris var. nanus Asch	Canada	1955	10.25642/IPK/GBIS/52228
208	PHA1132	IPK	Olomouska Zelenoluska Plocha	vulgaris var. nanus Asch	Czech Republic	1963	10.25642/IPK/GBIS/52268
209	PHA1459	IPK		vulgaris var. nanus Asch	Slovakia	1978	10.25642/IPK/GBIS/75850
210	PHA2177	IPK		vulgaris var. nanus Asch	Slovakia	1982	10.25642/IPK/GBIS/76524

## Sheet: Table_S2
Supplementary Table S2 Summary of the analysis of variance for nineteen quantitatively-measured traits
Trait	Source of variation	Sum of Squares	df	Mean Square	F	Significance	Number of replicates, individual plants	Number of subsamples
Germination Date	Genotype	637.897	199	3.206	2.549***	<0.001	2	2
	Residuals	251.5	200	1.258
	Total	889.397	399
Days to first flower	Genotype	181778	199	913.459	67.377***	<0.001	2	2
	Residuals	2711.5	200	13.558
	Total	184490	399
First flowering time	Genotype	169658	199	852.551	50.959***	<0.001	2	2
	Residuals	3346	200	16.73
	Total	173004	399
Days to flowering	Genotype	157188	199	789.891	56.411***	<0.001	2	2
	Residuals	2800.5	200	14.003
	Total	159989	399
Days to maturity	Genotype	190645	199	958.014	24.634***	<0.001	2	2
	Residuals	7778	200	38.89
	Total	198423	399
Days from flowering to maturity	Genotype	24746.7	184	134.493	5.595***	<0.001	2	2
	Residuals	4447	185	24.038
	Total	29193.7	369
Pod Number	Genotype	13029.3	184	70.812	4.768***	<0.001	2	2
	Residuals	2747.5	185	14.851
	Total	15776.8	369
Seen Number	Genotype	332657	184	1807.92	6.819***	<0.001	2	2
	Residuals	49045.5	185	265.111
	Total	381703	369
Total Dry Weight	Genotype	19778.1	184	107.49	2.479***	<0.001	2	2
	Residuals	8020.14	185	43.352
	Total	27798.3	369
Seed Dry Weight	Genotype	12121.8	184	65.879	2.691***	<0.001	2	2
	Residuals	4528.61	185	24.479
	Total	16650.4	369
Pod Dry Weight	Genotype	1389.95	184	7.554	2.111***	<0.001	2	2
	Residuals	662.154	185	3.579
	Total	2052.1	369
Average Seed Yield	Genotype	460.26	184	2.501	5.062***	<0.001	2	2
	Residuals	91.42	185	0.494
	Total	551.68	369
Average Pod Weight	Genotype	142.208	184	0.773	4.394***	<0.001	2	2
	Residuals	32.543	185	0.176
	Total	174.75	369
Pod Harvest Index	Genotype	1.461	184	0.008	3.228***	<0.001	2	2
	Residuals	0.455	185	0.002
	Total	1.916	369
Hundred Seed Weight	Genotype	120836	199	607.218	6.87***	<0.001	2	2
	Residuals	17676.7	200	88.383
	Total	138513	399
Seed Length	Genotype	6873.04	199	34.538	45.136***	<0.001	2	3
	Residuals	765.202	1000	0.765
	Total	7638.25	1199
Seed Diameter	Genotype	2474.74	199	12.436	67.945***	<0.001	2	5
	Residuals	329.45	1800	0.183
	Total	2804.19	1999
Protein	Genotype	10772	184	58.55	184.7***	<0.001	Pooled from 2	3
	Residuals	117	370	0.32
	Total	10889	554
Sulfur	Genotype	18.122	184	0.09849	14.61***	<0.001	Pooled from 2	3
	Residuals	2.494	370	0.00674
	Total	20.616	554
Carbon	Genotype	558	184	3.0324	6.717***	<0.001	Pooled from 2	3
	Residuals	167	370	0.4514
	Total	725	554

## Sheet: Table_S3
Supplementary Table S3 Genotype performances for all phenotypic traits evaluated in the study. Values are means of two independent replicates for yield related and phenological traits. Values are means of three independent replicates for seed quality traits. Values are means of ten independent replicates for seed traits. Refer to Table 1 for trait abbreviations. na = data not available
Genotype	GH	PC	PS	Sdia	SL	SS	SD	HSWT	PN	SN	TDWT	SDWT	PDWT	ASY	APWT	PHI	GD	DTBI	FFT	FT	DTM	DFTM	Nitrogen	Protein	Sulfur	Carbon	C:N
NCB1	4	1	3	8	14.8	2	118.4	46.165	4.5	12	8.39	5.54	2.85	2.675	1.86	0.66	9.5	53.5	57	57	113	56	3.0844	19.2775	2.77141	40.8316	13.238
NCB3	4	4	3	8.2	14.8083	2	121.428	49.12	13	51	33.665	23.62	10.045	3.875	2.65	0.7	9	46.5	48.5	48.5	109.5	61	3.35411	20.9632	2.63627	42.3315	12.6216
NCB4	4	na	na	8.8	10.8067	2	95.0987	36.4	na	na	na	na	na	na	na	na	9.5	140	140	140	180	na	na	na	na	na	na
NCB7	4	na	na	8.75	11.04	2	96.6	35.13	na	na	na	na	na	na	na	na	12	140	140	140	180	na	na	na	na	na	na
NCB8	4	na	na	8.8	11.7417	2	103.327	34.05	na	na	na	na	na	na	na	na	10	140	140	140	180	na	na	na	na	na	na
NCB9	4	na	na	8.6	12.205	2	104.963	33.04	na	na	na	na	na	na	na	na	11	140	140	140	180	na	na	na	na	na	na
NCB10	4	1	3	7.05	12.1067	2	85.352	24.055	15	85	25.72	19.735	5.985	5.775	1.805	0.77	9	43	46.5	46.5	103.5	57	3.92466	24.5291	2.71087	43.7073	11.1371
NCB11	4	1	3	9.95	13.125	3	130.594	32.595	13.5	35	18.565	11.33	7.235	2.56	1.355	0.615	9.5	64	73	73	133	60	2.02976	12.686	2.61598	42.7246	21.0513
NCB12	4	1	3	9.75	13.275	3	129.431	33.065	13.5	41	21.895	13.48	8.415	3.035	1.63	0.615	12.5	69	74.5	74.5	136	61.5	1.55257	9.70359	2.48363	42.6729	27.489
NCB13	4	3	3	6.5	8.97167	1	58.3158	17.87	13	81.5	20.18	14.93	5.25	6.07	1.47	0.755	8.5	57.5	61.5	61.5	109.5	48	3.68607	23.0379	2.66572	43.0211	11.6715
NCB14	4	4	3	6.65	9.45	1	62.8425	23.42	14	58	17.71	13.585	4.125	4.395	1.35	0.77	8.5	45.5	49	49	110.5	61.5	3.41635	21.3522	2.66539	42.1039	12.3252
NCB15	4	na	na	8.9	12.93	2	115.077	35.73	na	na	na	na	na	na	na	na	9.5	44	49.5	49.5	180	na	na	na	na	na	na
NCB16	4	na	na	8.6	13.0467	2	112.201	35.93	na	na	na	na	na	na	na	na	11	140	140	140	180	na	na	na	na	na	na
A222	4	2	3	6.55	9.2	1	60.26	19.92	12.5	66	16.665	13.005	3.66	5.265	1.34	0.78	8	47	49.5	49.5	105.5	56	3.31953	20.7471	2.74948	42.9073	12.9261
A286	4	4	3	7.95	11.1367	2	88.5365	27.475	17.5	92	30.55	24.665	5.885	5.03	1.69	0.815	9	54.5	57.5	57.5	106	48.5	3.67224	22.9515	2.73999	42.3074	11.521
AB136	4	2	3	7.1	10.3567	1	73.5323	23.805	12	77.5	22.935	18.455	4.48	6.455	1.915	0.805	8	45	48.5	48.5	100	51.5	2.78011	17.3757	2.71676	41.2971	14.8559
ALB213	4	1	3	7.9	11.6633	2	92.1403	26.59	22	80	26.505	21.245	5.26	3.645	1.2	0.8	9	40.5	44.5	45.5	96.5	52	5.02425	31.4016	2.76977	42.797	8.51803
ALB67	4	4	3	7.95	12.0783	2	96.0227	28.39	12	37.5	14.63	10.645	3.985	3.19	1.235	0.725	8	41	47.5	47.5	101	53.5	3.44402	21.5251	2.64118	41.7281	12.1163
ALB123	4	4	3	7.05	10.605	1	74.7652	23.79	25	77.5	23.835	18.455	5.38	3.86	1.165	0.775	8.5	39	43.5	45.5	91	47.5	3.33682	20.8551	2.68764	43.0004	12.8936
ALB21	4	2	3	7	10.3367	1	72.3567	20.635	37	81.5	22.765	16.71	6.055	2.26	0.625	0.735	11	53	56	56	105	49	3.1259	19.5368	2.71055	42.3315	13.542
AMENDOIN	4	5	3	8.3	12.1083	2	100.499	31.115	10.5	36	17.57	11.485	6.085	3.44	1.62	0.665	9	43.5	48	48	93	45	4.07335	25.4584	2.80314	43.1728	10.599
AND277	1	1	3	8.25	17.3	3	142.725	54.3	3.5	7.5	7.06	4.22	2.84	2.29	2.13	0.57	9	38	43.5	45	112	68.5	4.32231	27.0144	2.70956	42.2384	9.77229
AND620	4	4	3	6.6	10.7033	1	70.642	26.385	9	50.5	16.955	13.495	3.46	5.585	1.845	0.795	11.5	46	49.5	49.5	108	58.5	2.8873	18.0456	2.66474	41.9902	14.5455
BALONBAYO	4	na	3	9.75	13.14	3	128.115	62.83	na	na	na	na	na	na	na	na	10.5	140	140	140	180	na	na	na	na	na	na
BAT332	4	10	3	6.4	8.185	1	52.384	17.475	27	102	24.755	17.8	6.955	3.8	0.915	0.715	8.5	60	62	62	109.5	47.5	4.2082	26.3013	2.72854	43.0453	10.2289
BAT477	4	4	3	7.15	10.5867	1	75.6947	19.33	15.5	95	23.92	18.21	5.71	6.06	1.515	0.775	8	48.5	52	52	102.5	50.5	3.18468	19.9042	2.63463	42.1867	13.2479
BFS10	4	2	3	7.7	11.6767	2	89.9103	33.92	11	58	23.22	18.98	4.24	4.97	2.055	0.815	9.5	42	44.5	45	105	60.5	3.33337	20.8335	2.58817	41.6316	12.4898
BFS32	4	2	3	7.2	10.7533	1	77.424	22.81	15	75	22.24	17.1	5.14	5.1	1.5	0.77	10	41	45.5	45.5	96.5	51	2.94609	18.413	2.615	42.0126	14.2655
BFS39	4	2	3	7.85	11.935	2	93.6898	26.615	13	54.5	20.115	14.25	5.865	4.2	1.565	0.715	14	46.5	52.5	52.5	103.5	51	3.36794	21.0497	2.59668	42.7832	12.7029
BRB191	3	2	3	7.8	15.18	2	118.404	54.39	6	19	13.475	10.19	3.285	3.315	2.395	0.76	9.5	39.5	43.5	44	113	69.5	3.138	19.6125	2.55954	42.297	13.4788
G21212	4	1	3	7.25	9.67	1	70.1075	18.185	24	125	29.755	22.63	7.125	5.205	1.245	0.76	8.5	43	44.5	45.5	93	48.5	2.93917	18.3698	2.58915	41.9212	14.2643
G2858	4	1	3	7.65	11.3617	2	86.9168	27.5	8	21	7.94	5.5	2.44	2.57	0.98	0.71	9	66	70.5	70.5	125.5	55	4.13213	25.8258	2.65819	42.5936	10.3086
G5686	1	1	3	8.6	16.1117	3	138.56	64.18	3	9	8.535	5.72	2.815	3.125	3.01	0.67	9.5	41.5	45	45.5	112	67	5.18331	32.3957	2.70564	42.3212	8.16524
G2333	4	na	na	6.45	10.1317	1	65.3493	21.19	na	na	na	na	na	na	na	na	9	140	140	140	180	na	na	na	na	na	na
GITANGA	4	1	3	7.25	13.64	2	98.89	37.035	3	13	6.835	5.025	1.81	4.6	2.325	0.73	8	68.5	71.5	71.5	129	57.5	3.81746	23.8592	2.6932	42.0833	11.0275
GLORIA	4	4	3	8.45	14.755	3	124.68	56.665	8	16	13.07	9.16	3.91	2	1.61	0.71	8.5	56.5	59.5	59.5	115	55.5	3.81746	23.8592	2.69255	41.5798	10.8953
GLP2	4	4	3	6.95	13.9433	2	96.9062	34.18	12	39	22.815	13.02	9.795	3.235	1.905	0.575	9	45	48	48	110.5	62.5	4.29119	26.8199	2.7256	42.5143	9.90803
GOFTA	4	na	na	7.55	11.1633	2	84.2832	26.81	na	na	na	na	na	na	na	na	9.5	81	85.5	85.5	180	na	na	na	na	na	na
HM21-7	1	1	3	7.7	13.5883	2	104.63	46.795	6.5	15.5	10.72	7.22	3.5	2.39	1.66	0.675	8	39.5	42.5	44	116.5	74	4.08372	25.5232	2.68372	41.604	10.1874
Kabulangeti	4	3	3	6.9	9.44333	1	65.159	19.945	19.5	106.5	28.29	20.88	7.41	5.415	1.45	0.74	8.5	41	44	44.5	95	51	3.49243	21.8277	2.70629	41.5902	11.9099
KATB1	1	1	3	8.65	11.0783	2	95.8276	44.61	11	33	19.69	14.555	5.135	2.99	1.8	0.74	8	35.5	39.5	44	93	53.5	3.24346	20.2716	2.704	42.0626	12.9694
KIANGALA	4	na	na	6.95	11.5067	2	79.9713	26.07	na	na	na	na	na	na	na	na	14	140	140	140	180	na	na	na	na	na	na
MAB351	4	6	3	7.15	11.2233	2	80.2468	24.14	11.5	48	15.56	11.205	4.355	4.135	1.39	0.715	11	60	63	63	109	46	3.94886	24.6804	2.77304	41.2454	10.4449
MAB352	3	6	3	7	11.0117	1	77.0817	22.51	12.5	53	17.015	12.995	4.02	4.045	1.25	0.735	10.5	66	69	69	115	46	3.22271	20.142	2.67717	40.3558	12.5249
MAB353	4	4	3	7.25	11.4933	2	83.3267	23.45	16	66.5	21.125	15.605	5.52	4.16	1.32	0.735	8.5	45.5	48	48	101	53	4.0526	25.3287	2.75537	40.9833	10.1125
MAB354	4	4	3	7.7	11.88	2	91.476	26.44	14	50.5	18.915	13.28	5.635	3.65	1.38	0.705	10	50	55	55	106	51	4.3638	27.2738	2.67815	41.5902	9.53802
MAC42	4	na	na	8.2	14.605	2	119.761	42	na	na	na	na	na	na	na	na	8.5	62	66	66	180	na	na	na	na	na	na
MAHARAGWESOJA	4	1	3	6.75	8.66333	1	58.4775	20.895	18.5	74.5	21.19	15.31	5.88	4.01	1.155	0.725	8	59.5	61.5	61.5	110.5	49	2.7075	16.9218	2.61468	40.5765	14.9863
MAR001	4	7	3	7.45	10.4917	1	78.1629	25.99	10.5	73	24.395	18.885	5.51	6.95	2.335	0.775	8	51.5	54.5	54.5	105	50.5	2.94954	18.4347	2.86204	40.6144	13.7742
MAZ154	4	1	3	7.95	13.8317	2	109.962	41.26	6.5	26.5	14.2	10.85	3.35	3.915	2.135	0.76	13	65	69	69	129.5	60.5	3.40598	21.2874	2.70956	40.3144	11.8368
MAZ155	4	1	3	8.9	15.17	3	135.013	62.955	12	35	27.93	20.9	7.03	2.8	2.305	0.745	16.5	60	64	64	117.5	53.5	3.03945	18.9966	2.60453	41.0764	13.5174
MAZ156	1	1	3	8.7	15.8933	3	138.272	89.47	5.5	9.5	8.99	6.55	2.44	1.665	1.64	0.73	8.5	38.5	42.5	45	109.5	67	4.45025	27.8141	2.68895	43.5073	9.77711
MAZ157	3	1	3	8.35	14.6767	2	122.55	48.71	8.5	23	15.25	11.215	4.035	2.72	1.805	0.735	8.5	36	41.5	44	106	64.5	3.89354	24.3346	2.68175	43.5935	11.1969
MAZ158	3	1	3	8.3	10.81	2	89.723	36.365	3.5	16	8.925	5.815	3.11	4.625	2.55	0.66	11.5	40	44.5	45	142.5	na	3.33682	20.8551	2.71774	42.6039	12.7678
MAZ159	3	1	3	8.2	15.485	3	126.977	51.845	5	10.5	8.735	5.38	3.355	1.98	1.695	0.6	9.5	38	45.5	45.5	120	74.5	3.64803	22.8002	2.74883	43.4866	11.9265
MAZ160	3	1	3	8.35	15.7833	3	131.791	61	1.5	2	2.025	1.22	0.805	1.5	1.385	0.62	8.5	37.5	41	44	125.5	84.5	5.03463	31.4664	2.69713	43.6521	8.6712
MAZ162	4	4	3	8.45	13.185	2	111.413	40.825	5.5	12	8.705	4.87	3.835	2.185	1.585	0.565	9	39	41.5	44	113	71.5	3.97307	24.8317	2.7184	43.4383	10.9312
MAZ163	4	5	3	9.3	15.895	3	147.823	66.335	9	22.5	22.205	15.28	6.925	2.58	2.475	0.685	9.5	36.5	41.5	44	108.5	67	4.16325	26.0203	2.73443	42.6936	10.2548
MAZ165	1	2	3	7.95	13.395	2	106.49	47.21	3.5	8	5.375	3.885	1.49	2.2	1.435	0.73	9	36.5	40.5	44	118.5	78	2.74207	17.138	2.61075	42.0557	15.3386
MAZ166	3	3	3	8.9	13.3317	2	118.652	48.03	7.5	25.5	18.91	12.955	5.955	3.2	2.345	0.66	9	38.5	42	44	100	58	4.06643	25.4152	2.60846	43.097	10.5992
MAZ167	4	2	3	7.9	14.2683	2	112.72	45.855	6	17.5	11.975	8.42	3.555	3.1	2.18	0.69	8.5	37.5	42	45	117.5	75.5	3.54073	22.1295	2.68381	41.6513	11.7667
MAZ168	1	3	3	7.95	11.8883	2	94.5122	42.09	10	34.5	18.57	13.785	4.785	3.415	1.905	0.75	9	35.5	39	44	103.5	64.5	2.31692	14.4807	2.53823	39.5933	17.0908
MAZ169	4	4	3	8.7	12.9967	2	113.071	54.18	11.5	25	19.48	13.35	6.13	2.165	1.7	0.685	8.5	37.5	42	44	116.5	74.5	3.90057	24.3786	2.63096	41.1553	10.5525
MAZ170	4	1	3	8.3	15.4767	3	128.456	54.555	5	11	7.955	6.075	1.88	2.2	1.59	0.76	12	54	57.5	57.5	122.5	65	4.10426	25.6516	2.61142	41.3341	10.0718
MAZ171	1	4	3	7.9	16.9133	3	133.615	50.75	3	4	3.1	2.03	1.07	1.5	1.085	0.665	9	48.5	51.5	52.5	127	75.5	3.77497	23.5935	2.57234	40.0859	10.6231
MBC26	4	1	3	8.05	15.535	3	125.057	54.145	4	10.5	8.335	5.395	2.94	2.565	2.1	0.65	9	61	64	64	126.5	62.5	3.89039	24.3149	2.5544	40.0926	10.3067
MBC36	4	4	3	8.6	12.6367	2	108.675	43.565	9.5	32.5	20.03	13.68	6.35	3.4	2.115	0.69	8.5	44	47	47	101	54	2.86517	17.9073	2.63192	40.9563	14.3033
MBC40	4	1	3	8	12.5633	2	100.507	43.5	7.5	24	15.12	10.44	4.68	3.215	2.025	0.69	9	50.5	54.5	54.5	115.5	61	3.15712	19.732	2.59764	40.9866	12.9851
MBC46	4	na	na	8.05	12.8367	2	103.335	38.88	na	na	na	na	na	na	na	na	9	111.5	115.5	115.5	180	na	na	na	na	na	na
MCM1015	3	4	3	7.2	10.085	1	72.612	21.975	18	95	26.535	20.84	5.695	5.42	1.55	0.785	8	52	53.5	53.5	103.5	50	3.94131	24.6332	2.54768	44.0668	11.1816
MCM2001	4	2	3	7.2	10.1117	1	72.804	22.085	15.5	74	20.65	16.39	4.26	4.61	1.28	0.795	9	58.5	62	62	105.5	43.5	3.36759	21.0475	2.56497	42.0898	12.5016
MCM5001	4	4	3	6.65	9.01	1	59.9165	21.55	16.5	61	17.62	12.965	4.655	3.715	1.07	0.735	9	55	58.5	58.5	104.5	46	3.1673	19.7957	2.66715	41.9616	13.2482
MNC257	4	4	3	7.85	14.49	2	113.746	42.845	4.5	10.5	7.43	4.58	2.85	2.325	1.63	0.61	9	58.5	64.5	64.5	149.5	na	3.79533	23.7208	2.63384	41.4994	10.9341
MNC358	4	2	3	8.05	15.1317	2	121.81	48.23	8.5	26.5	18.53	12.495	6.035	3.205	2.285	0.68	11	61	66	66	120	54	3.77497	23.5935	2.62135	43.6856	11.581
MONTCALM	3	4	3	9.7	18.5183	3	179.628	60.075	6	22	18.185	13.225	4.96	3.745	3.06	0.73	9	36	40	44	97.5	57.5	4.64402	29.0251	2.72512	43.9858	9.47188
NABE15	1	4	3	8.8	12.855	2	113.124	48.42	5.5	19	11.11	7.96	3.15	3.415	2.17	0.745	8	35	40	44	102.5	62.5	5.26187	32.8867	2.71231	42.9029	8.15531
NABE16	4	4	3	9.25	15.1267	3	139.922	64.535	11.5	35.5	32.3	22.93	9.37	3.085	2.81	0.71	9	41	44	44	101.5	57.5	2.75314	17.2072	2.60629	42.6364	15.4874
NABE3	4	4	3	7.25	10.1733	1	73.7567	19.505	21.5	106	27.61	20.475	7.135	4.925	1.285	0.74	8.5	55	58.5	58.5	105	46.5	3.61202	22.5751	2.6316	42.4171	11.7544
NUA35	3	3	3	8.4	17.3067	3	145.376	80.83	10.5	20.5	21.525	16.43	5.095	2.18	2.245	0.76	9.5	35.5	39	44	98.5	59.5	3.91415	24.4634	2.66939	42.7747	10.9434
NUA398	4	1	3	8.2	15.8333	3	129.833	58.415	7	23.5	19.01	13.85	5.16	3.375	2.71	0.725	10	59.5	63	63	117.5	54.5	3.80212	23.7633	2.63672	42.6532	11.2179
NUA457	4	2	3	8.55	13.6883	2	117.035	46.475	7.5	17.5	12.835	7.635	5.2	2.305	1.78	0.6	9.5	45.5	53.5	53.5	105	51.5	4.06691	25.4182	2.61398	42.8185	10.5282
NUA561	3	1	3	8.3	15.92	3	132.136	52.67	4	12.5	9.16	6.6	2.56	3.125	2.29	0.72	10	36	39.5	44	99	59.5	4.22647	26.4154	2.59572	42.7376	10.1168
NUC168	4	1	na	8.05	15.045	2	121.112	40	na	na	na	na	na	na	na	na	10	49	54	54	180	na	na	na	na	na	na
NUC177	4	5	3	8.75	11.86	2	103.775	39.83	8.5	36	21.165	14.75	6.415	4.265	2.425	0.695	8.5	53	56.5	56.5	113	56.5	3.69689	23.1055	2.66363	41.8098	11.3101
NUC342	4	1	3	8.4	12.1117	2	101.738	45.95	8	38	24.95	17.46	7.49	4.825	3.14	0.7	11	54.5	58.5	58.5	113	54.5	3.21823	20.1139	2.57394	41.5905	12.9253
NUS7	1	1	3	7.65	13.3	2	101.745	42.925	7.5	12.5	6.64	4.61	2.03	1.535	0.91	0.695	10	37.5	42	44	108	66	4.8545	30.3406	2.62391	41.9987	8.65272
RANJONOMBY	1	1	3	7.8	15.5133	2	121.004	67.835	13.5	22.5	20.185	14.115	6.07	1.63	1.505	0.7	8.5	37	41.5	44	106	64.5	4.06352	25.397	2.60053	42.8658	10.5483
ROBA1	4	1	3	6.65	8.60333	1	57.2122	18.25	16.5	91.5	22.755	16.975	5.78	5.51	1.365	0.735	8	58	60	60	108.5	48.5	4.45392	27.837	2.61943	42.8422	9.62308
RWR2154	4	5	3	8.95	15.5383	3	139.068	51.345	10.5	37	24.575	17.89	6.685	3.46	2.38	0.725	9	38.5	43.5	45	94	50.5	3.02133	18.8833	2.61718	41.0575	13.5906
RWR2245	4	1	3	7.05	12.1217	2	85.4578	33.64	11.5	35.5	15.935	11.985	3.95	3.1	1.36	0.775	9	42	47.5	47.5	107	59.5	2.57322	16.0826	2.54447	40.764	15.8424
RWR719	4	4	3	6.5	10.1883	1	66.2242	22.395	17	68.5	20.91	15.49	5.42	4.29	1.255	0.75	8.5	56.5	60	60	110.5	50.5	3.17749	19.8593	2.72352	41.9009	13.1882
RWV1129	4	na	na	7.7	13.4317	2	103.424	41.94	na	na	na	na	na	na	na	na	9.5	83	87	87	180	na	na	na	na	na	na
SAB620	1	1	3	7.55	14.74	2	111.287	36.655	8.5	23.5	13.18	7.865	5.315	2.675	1.625	0.6	10	36.5	39.5	44	105	65.5	2.82443	17.6527	2.6396	42.5621	15.0703
SAB622	1	1	3	7.05	13.7283	2	96.7847	41.115	6.5	18	10.39	6.935	3.455	2.415	1.5	0.625	9.5	38	42.5	44.5	107	64.5	4.19591	26.2245	2.68188	43.6889	10.4215
SAB623	1	na	na	6.55	13.6267	2	89.2547	26.29	na	na	na	na	na	na	na	na	13	41	45.5	47	180	na	na	na	na	na	na
SAB626	1	1	3	9.75	13.0633	3	127.367	63.425	7	18	14.785	11.51	3.275	2.625	2.125	0.78	9.5	35.5	40	44	103.5	63.5	4.22307	26.3942	2.62263	43.2335	10.2378
SAB629	3	5	3	7.9	15.6483	3	123.622	43.21	4.5	10	7.53	4.185	3.345	2.3	1.705	0.555	9	39.5	42.5	44	102.5	60	4.37244	27.3278	2.63448	43.301	9.9129
SAB630	1	5	3	9	13.585	2	122.265	51.38	5.5	14	11.335	6.91	4.425	2.915	2.325	0.645	10	38	41	44	115	74	3.29291	20.5807	2.57971	42.9299	13.0424
SAB659	1	1	3	10.35	14.7633	3	152.8	110.94	7	11.5	16.1	11.785	4.315	1.64	2.3	0.73	8.5	36	39.5	44	97.5	58	4.10765	25.6728	2.58355	43.7665	10.6565
SAB686	1	5	3	9.4	13.6917	3	128.702	46.57	3.5	10.5	6.8	4.725	2.075	3	1.995	0.695	9	37	40	44	100	60	5.27545	32.9715	2.8036	42.0224	7.96727
SAB712	1	1	3	9.65	14.34	3	138.381	66.535	7.5	16	13.82	10.71	3.11	2.195	1.845	0.78	9.5	36	40	44	99	59	4.37923	27.3702	2.71039	41.9987	9.59025
SEQ1003	4	4	3	7.45	13.0283	2	97.0611	38.705	9.5	34.5	20.92	13.19	7.73	3.545	2.17	0.625	8	46.5	52	52	105	53	3.6256	22.66	2.59989	43.9184	12.1139
SEQ1027	4	5	3	7.7	14.8383	2	114.255	42	7.5	23.5	15.045	9.97	5.075	3.125	1.995	0.655	8	49	51.5	51.5	103.5	52	3.7512	23.445	2.66587	44.5121	11.8659
SER128	4	6	3	7.3	9.74333	1	71.1263	22.7	23.5	107.5	31.66	25.31	6.35	4.54	1.3	0.805	9.5	42.5	46.5	47	94.5	48	4.06691	25.4182	2.68124	43.2403	10.642
SER82	4	6	3	7.55	12.4	2	93.62	32.18	10.5	42.5	17.865	13.965	3.9	4.015	1.66	0.79	9.5	40	42	44	96.5	54.5	4.75265	29.7041	2.6537	43.6856	9.19261
SER22	4	1	3	7.05	10.1467	1	71.534	22.48	15.5	69	18.745	15.035	3.71	4.505	1.26	0.805	10	45	47	47	94.5	47.5	3.01115	18.8197	2.63544	42.8995	14.2478
SER48	4	4	3	7.7	11.38	2	87.626	31.705	16	75.5	28.96	23.915	5.045	4.815	1.84	0.825	9.5	39	42.5	44	99	56.5	3.26915	20.4322	2.74274	42.2147	12.9153
SMB17	4	4	3	6.5	11.9267	1	77.5233	31.29	12.5	35	17.545	9.77	7.775	2.845	1.405	0.56	8	51.5	56	56	104.5	48.5	5.15323	32.2077	2.73025	43.608	8.4654
SMR113	4	4	3	6.85	10.9017	1	74.6764	23.48	15.5	66.5	21.235	15.525	5.71	4.345	1.39	0.735	8.5	39.5	42.5	44	90.5	48	3.86323	24.1452	2.61943	41.8098	10.8226
SMR129	4	4	3	7.85	12.9067	2	101.317	31.7	12	41.5	20.255	13.21	7.045	3.495	1.705	0.65	9	41	45	45	94.5	49.5	4.34528	27.158	2.65306	43.1593	9.9421
SUG131	4	5	3	8.35	14.765	2	123.288	55.475	5	17	14.645	9.43	5.215	3.54	2.945	0.64	9	44	49	49	119	70	3.74102	23.3814	2.59893	41.8368	11.1833
SXB412	4	3	3	7.55	11.1517	2	84.1951	24.54	17.5	76	25.385	18.625	6.76	4.44	1.455	0.735	8.5	55.5	57.5	57.5	101	43.5	4.03297	25.206	2.66042	42.1236	10.4449
TO	4	2	3	7.2	11.465	2	82.548	31.3	8.5	35	13.995	11.405	2.59	4.425	1.68	0.815	11	52	54.5	54.5	111.5	57	2.74975	17.1859	2.49707	41.2599	15.0064
TU	4	10	3	7.75	11.57	2	89.6675	30.765	23.5	64.5	24.255	18.755	5.5	2.67	1.03	0.79	11	44.5	48	48	108.5	60.5	2.76672	17.292	2.67708	41.3105	14.9311
UBR-92-25	4	1	3	6.2	8.32	1	51.584	16.89	20.5	117	26.725	19.78	6.945	5.94	1.35	0.74	8	53	56	56	102.5	46.5	3.2352	20.22	2.64313	40.6763	12.5756
UYOLE96	4	1	3	7.45	15.225	2	113.426	43.605	9	28	18.36	11.98	6.38	3.075	2.045	0.65	9.5	46.5	52	52	118.5	66.5	3.63239	22.7024	2.64441	42.6971	11.7546
UYOLE98	4	1	3	8.35	13.005	2	108.592	45.315	10.5	32.5	18.96	14.275	4.685	3.005	1.775	0.765	8	38	42.5	44	99	56.5	2.94665	18.4165	2.59508	42.5993	14.473
39	1	1	1	4.2	9.015	1	37.863	8.88	10.5	25	3.495	2.22	1.275	2.43	0.33	0.635	8	38.5	43	44	106	63	5.41124	33.8202	2.67195	42.2484	7.80726
64	1	1	3	4.2	9.38	1	39.396	10.835	14	47.5	6.825	5.085	1.74	3.345	0.48	0.74	8	40	44	44.5	108.5	64.5	3.87341	24.2088	2.61526	41.7727	10.7852
65	1	1	3	4.15	9.13	1	37.8895	8.415	15	58.5	7.075	4.93	2.145	3.9	0.47	0.695	8	38.5	44	44.5	109.5	65.5	3.85644	24.1027	2.6774	41.6546	10.8024
99	1	1	1	5.1	11.2933	1	57.596	13.805	14	34	6.65	4.64	2.01	2.445	0.48	0.705	8	36	40	44	106	66	4.85789	30.3618	2.67676	41.7592	8.59719
135	1	1	2	5.85	10.22	1	59.787	17.97	15.5	62.5	15.02	11.18	3.84	4.07	0.98	0.745	8	36	39	44	106	67	4.11784	25.7365	2.61686	43.3482	10.5265
153	1	1	2	6.05	11.1117	1	67.2256	21.57	10.5	22	7.46	4.775	2.685	2.03	0.695	0.63	8	37.5	41.5	44	108	66.5	4.90542	30.6589	2.68028	43.9993	8.96959
205	1	1	2	9.65	13.3967	3	129.278	60.895	8	19.5	16.365	11.92	4.445	2.44	2.05	0.725	9	36.5	40.5	44	103.5	63	4.22647	26.4154	2.61878	43.5304	10.2995
177	1	1	1	6.25	11.9	1	74.375	27.965	16.5	44.5	17.9	12.53	5.37	2.59	1.045	0.69	8.5	36.5	40	44	102.5	62.5	4.35547	27.2217	2.589	43.2234	9.92513
184	1	1	2	7.15	13.4617	2	96.2509	38.06	7.5	28.5	14.515	10.69	3.825	3.745	1.915	0.73	8	39	46	47	108	62	3.05867	19.1167	2.55472	42.6667	13.9519
213	1	1	2	6.65	11.985	2	79.7002	28.615	8	26.5	9.525	7.59	1.935	3.39	1.215	0.8	8.5	38	43	44	101.5	58.5	4.26381	26.6488	2.53262	42.8084	10.0516
PHA1028	3	1	3	8.9	11.985	2	106.666	53.705	8.5	34.5	24.06	18.475	5.585	4.065	2.84	0.77	8.5	34.5	37	44	85	48	2.81764	17.6103	2.50796	41.8199	14.8452
PHA1053	3	1	1	7.35	13.665	2	100.438	41.72	9.5	39.5	22.785	16.465	6.32	4.16	2.405	0.725	9	36	39	44	93	54	3.20125	20.0078	2.5922	41.7288	13.0359
PHA1054	1	1	3	9.1	12.6033	2	114.69	55.565	3	11	7.915	6.365	1.55	3.5	2.465	0.795	8.5	35.5	38.5	44	93	54.5	5.85595	36.5997	2.62903	44.1646	7.54488
PHA1058	3	1	1	5.95	11.045	1	65.7177	21.91	15	52.5	14.51	11.505	3.005	3.5	0.97	0.79	8	36.5	39.5	44	93	53.5	4.09747	25.6092	2.58451	43.1559	10.5365
PHA1074	1	4	2	8.45	14.065	2	118.849	40.235	8.5	32	15.14	11.33	3.81	3.52	1.725	0.75	8	35	39.5	44	93	53.5	3.38457	21.1536	2.53647	42.94	12.6903
PHA1094	1	4	3	9.7	18.8883	3	183.217	58.335	3	10	9.175	6.34	2.835	4	2.95	0.76	10	36	39.5	44	101	61.5	4.26381	26.6488	2.63832	42.7646	10.0321
PHA1109	1	1	1	6.7	13.6667	2	91.5667	28.735	4.5	13.5	5.48	3.92	1.56	2.92	1.165	0.725	8.5	35	38.5	44	92	53.5	4.34189	27.1368	2.62711	43.5979	10.0476
PHA1110	3	1	3	7.6	13.7433	2	104.449	39.42	10	39.5	20.765	15.475	5.29	3.945	2.08	0.745	8.5	37	40.5	44	95	54.5	3.15373	19.7108	2.64441	42.2653	13.4048
PHA1122	4	3	3	7.55	11.71	2	88.4105	30.76	21.5	80	31.15	24.705	6.445	3.78	1.465	0.79	9	37.5	41	44	95.5	54.5	3.6256	22.66	2.60181	43.5439	12.0105
PHA1124	1	1	1	7.4	13.5567	2	100.319	41.575	7	25.5	14.37	10.76	3.61	3.5	1.945	0.755	8.5	35.5	40.5	44	97.5	57	4.19931	26.2457	2.60501	43.1593	10.2776
PHA1297	3	5	3	9.9	14.9267	3	147.774	57.105	8	20	14.83	11.4	3.43	2.495	1.85	0.77	9	36	40.5	44	96.5	56	3.99223	24.9514	2.67772	42.4103	10.6243
PHA1300	3	1	2	6.95	10.7883	1	74.9789	24.35	14	65	21.48	16.14	5.34	4.79	1.545	0.745	9	38.5	41	44	88.5	47.5	4.20949	26.3093	2.65498	41.4185	9.84137
PHA1343	3	3	2	8.9	15.7267	3	139.967	70.54	7	17.5	15.535	8.695	6.84	2.44	2.605	0.61	10.5	36.5	41	44	96.5	55.5	4.27399	26.7125	2.60501	41.9616	9.81987
PHA992	1	1	2	7.9	16.41	3	129.639	49.825	4.5	18	11.375	9.025	2.35	4.33	2.605	0.815	8.5	35.5	38.5	44	95.5	57	3.98544	24.909	2.53358	41.8908	10.5111
PHA14304	1	1	1	6.5	13.695	2	89.0175	27.86	7.5	24.5	10.645	7.145	3.5	3.23	1.39	0.66	9	36	39	44	93	54	5.84576	36.536	2.72993	42.4812	7.26766
PHA6438	4	4	3	10.3	13.72	3	141.316	80.335	9.5	26.5	28.805	21.86	6.945	2.77	2.95	0.76	9.5	46.5	50.5	50.5	109	58.5	3.37438	21.0899	2.63576	40.9057	12.1227
PHA1780	3	4	3	7.1	14.2317	2	101.045	30.595	16	40	19.69	12.145	7.545	2.445	1.225	0.605	8.5	38.5	41	44	106	65	4.45052	27.8158	2.61078	41.4826	9.31892
PHA6880	4	4	3	9.15	11.1217	2	101.763	49.995	5	18	12.19	9	3.19	3.79	2.535	0.735	8.5	60	62	62	120	58	3.74781	23.4238	2.65114	41.405	11.0511
PHA7133	4	1	3	8.8	18.84	3	165.792	71.795	3.5	9	8.67	6.315	2.355	2.54	2.48	0.73	10	57.5	59.5	59.5	126	66.5	3.98544	24.909	2.56626	41.7862	10.4909
PHA7135	1	4	2	9.15	18.8767	3	172.722	83.98	1.5	5.5	5.595	4.54	1.055	3.75	3.86	0.815	8.5	34.5	38	44	105.5	67.5	4.99708	31.2317	2.62231	42.6026	8.53234
PHA887	4	3	3	5.95	11.565	1	68.8118	20.92	20	81.5	22.415	16.815	5.6	4.08	1.14	0.75	8	49	53.5	53.5	101.5	48	4.05333	25.3333	2.61846	42.805	10.5618
PHA5851	3	1	3	8.55	13.04	2	111.492	44.13	13	37.5	20.94	16.555	4.385	2.945	1.63	0.79	8	35.5	38	44	84.5	46.5	3.76818	23.5511	2.57779	42.3496	11.2423
PHA5854	4	3	3	10.05	12.7033	3	127.668	73.775	8.5	23	21.33	16.7	4.63	2.665	2.52	0.78	10	44.5	51	51	107	56	2.95683	18.4802	2.62167	41.9583	14.1904
PHA5855	4	5	3	10.25	12.575	3	128.894	73.73	7	20	15.395	11.615	3.78	2.425	2.125	0.77	8.5	43.5	47	47	105	58	2.8482	17.8012	2.55216	42.2147	14.8268
PHA5876	4	3	3	9.45	15.2717	3	144.317	51.325	6	27	18.455	13.675	4.78	4.5	3.075	0.74	11.5	46.5	50	50	103.5	53.5	4.11105	25.694	2.61014	43.9049	10.6796
PHA1707	1	8	3	10.35	13.5183	3	139.915	70.335	4.5	13.5	11.24	9.11	2.13	3	2.57	0.82	10	39	43	45	105	62	3.62899	22.6812	2.53198	44.5762	12.2832
PHA1713	1	4	3	9.25	12.3017	2	113.79	49.205	7.5	21	13.945	10.08	3.865	2.705	1.815	0.73	9	38	42	44	100	58	3.08244	19.2652	2.58643	42.5352	13.8096
PHA1714	1	1	3	9.5	12.3883	2	117.689	65.99	5	12.5	10.95	8.275	2.675	2.5	2.19	0.755	9.5	40.5	52.5	54.5	111.5	59	4.39281	27.4551	2.64953	42.7578	9.73398
PHA1717	3	1	3	6.75	11.0483	1	74.5762	28.975	10	29.5	12.2	8.47	3.73	2.95	1.22	0.69	11.5	38.5	45	45	116.5	71.5	3.21823	20.1139	2.69309	43.3482	13.471
PHA1720	1	1	3	8.4	15.225	3	127.89	42.95	5.5	17.5	9.735	7.48	2.255	3.25	1.795	0.765	8	36	39.5	44	93	53.5	4.45052	27.8158	2.64697	42.832	9.62525
PHA1136	3	1	1	7.6	15.3767	2	116.863	57.775	6.5	17	13.535	9.605	3.93	2.645	2.045	0.71	8.5	34	40	44	92	52	4.96652	31.0408	2.69694	41.9819	8.4538
PHA1137	1	1	2	7.7	14.605	2	112.459	36.095	9	27	12.925	9.23	3.695	2.94	1.435	0.71	9	34.5	39.5	44	85.5	46	3.92773	24.5483	2.62263	43.1019	10.9739
PHA1138	3	8	1	9.4	16.1417	3	151.732	44.38	7	14.5	12.89	6.48	6.41	2.085	1.845	0.5	9.5	36	40	44	93	53	4.10935	25.6834	2.58723	43.1812	10.5086
PHA1139	1	1	3	8.4	11.8167	2	99.26	40.875	8.5	26	13.24	10.39	2.85	2.97	1.545	0.785	8	37	42.5	44	94.5	52	3.77497	23.5935	2.54319	42.9602	11.3822
PHA1140	4	3	3	8.6	10.6733	2	91.7907	36.155	12.5	50	23.805	17.685	6.12	3.955	1.895	0.75	8	44.5	47.5	47.5	99	51.5	2.77012	17.3132	2.59124	41.8132	15.0935
PHA12844	1	1	3	8.95	18.4667	3	165.277	82.4	1	3.5	4.05	3.145	0.905	3.5	4.05	0.73	8.5	36.5	45.5	47	116.5	71	4.84431	30.277	2.64441	44.1781	9.11965
PHA13193	4	3	3	8.4	12.26	2	102.984	45.905	18.5	77	48.72	35.37	13.35	4.18	2.645	0.725	9	46	49.5	49.5	105	55.5	4.10426	25.6516	2.50796	44.2422	10.7804
PHA13903	4	3	3	7.3	11.275	2	82.3075	23.375	20	84.5	26.005	19.48	6.525	4.225	1.3	0.75	8.5	49	53	53	102.5	49.5	2.64112	16.507	2.548	43.6248	16.519
PHA13904	4	3	3	6.9	9.81833	1	67.7465	22.5	23.5	127	35.335	29.055	6.28	5.445	1.5	0.815	9	59	61.5	61.5	107	45.5	3.12996	19.5623	2.64409	42.8388	13.6881
PHA13906	4	1	3	7.7	10.3883	2	79.9902	22.225	11.5	60	16.43	13.125	3.305	5.175	1.425	0.8	8.5	45	48.5	48.5	94.5	46	4.09407	25.5879	2.57298	44.3805	10.8403
PHA13199	4	6	3	6.55	8.23833	1	53.9611	19.415	18.5	79	20.33	15.165	5.165	4.26	1.1	0.745	8	58	60.5	60.5	115	54.5	3.84965	24.0603	2.58868	43.4663	11.2937
PHA14021	4	4	3	6.35	8.10667	1	51.4773	15.395	16	91.5	18.27	14.22	4.05	5.495	1.085	0.785	8.5	45	49	49	96.5	47.5	5.09892	31.8682	2.6316	44.5324	8.73433
PHA13221	4	2	3	7	10.1433	1	71.0033	21.16	13	79	21.405	16.92	4.485	6.08	1.625	0.795	8.5	55.5	58.5	58.5	106	47.5	3.67991	22.9995	2.61846	43.0007	11.6854
PHA14034	4	4	3	7.1	10.0183	1	71.1302	19.145	20.5	101.5	26.27	19.325	6.945	5.065	1.345	0.74	9.5	59	61.5	61.5	107	45.5	4.47089	27.9431	2.64537	42.4036	9.48582
PHA13947	1	4	3	8.7	16.5117	3	143.652	61.48	4.5	14.5	10.985	8.95	2.035	3.25	2.45	0.815	11.5	37	40	44	94.5	54.5	4.5286	28.3038	2.52269	44.2557	9.80748
PHA13948	4	1	3	7.35	12.9567	2	95.2315	33.575	7.5	18.5	9.28	6.215	3.065	2.555	1.28	0.67	8	52.5	57	57	105	48	3.52715	22.0447	2.56786	43.3381	12.2919
PHA5060	1	1	3	7.05	12.2383	2	86.2802	29.835	14	41.5	15.6	12.53	3.07	3	1.115	0.8	8.5	35.5	38.5	44	95.5	57	4.81715	30.1072	2.61366	44.2017	9.17715
PHA13577	4	10	3	6.85	9.44667	1	64.7097	18.215	24	116	27.43	21.155	6.275	4.845	1.15	0.775	8.5	49	52	52	101	49	3.39815	21.2384	2.57618	43.3044	12.7434
PHA13580	4	4	3	6.7	8.705	1	58.3235	17.76	15.5	67.5	15.14	11.925	3.215	4.355	0.98	0.79	8	49.5	52	52	99	47	4.13141	25.8213	2.66651	42.9501	10.3964
PHA14051	4	1	3	5.75	8.83667	1	50.8108	14.885	23.5	124.5	26.565	18.54	8.025	5.325	1.135	0.7	8	49.5	52	52	98	46	2.81764	17.6103	2.5938	42.6971	15.1551
PHA12178	4	2	3	6.9	9.95333	1	68.678	17.2	24	130.5	29.235	22.495	6.74	5.505	1.22	0.77	8	49.5	51.5	51.5	106	54.5	2.7158	16.9738	2.58707	43.0277	15.8433
PHA12402	4	3	3	6.8	8.99833	1	61.1887	17.865	25.5	95.5	21.58	17.06	4.52	3.745	0.845	0.79	8	52.5	56	56	98	42	4.34868	27.1792	2.66299	42.38	9.74575
PHA13693	4	3	3	8	12.8817	2	103.053	38.735	13.5	44.5	22.565	17.405	5.16	3.285	1.66	0.765	8.5	43.5	47	47	106	59	3.78175	23.636	2.59925	42.0898	11.1302
PHA13694	1	1	3	8.1	16.5983	3	134.446	62.545	9	25.5	20.81	15	5.81	2.7	2.365	0.705	9	36.5	41	44	116.5	75.5	3.48981	21.8113	2.50956	42.3192	12.1268
PHA13695	4	1	3	9.4	14.1333	3	132.853	56.555	7	20.5	17.475	11.945	5.53	2.81	2.325	0.695	9.5	41.5	45.5	46	92	46.5	3.89718	24.3574	2.72064	44.1916	11.3411
PHA13696	4	4	3	7.9	14.0817	2	111.245	43.44	8.5	29	16.585	11.96	4.625	3.41	2.14	0.705	8.5	47.5	52	52.5	101.5	49.5	4.03636	25.2273	2.59829	44.1174	10.9427
PHA13697	1	3	3	9	15.0967	3	135.87	48.305	2	6.5	4.13	3.185	0.945	3.25	2.065	0.74	10	45	49	49	100	51	4.76963	29.8102	2.65562	43.9319	9.21317
PHA13698	4	4	3	8.35	13.825	2	115.439	48.62	11	35.5	21.945	16.79	5.155	3.155	1.98	0.77	8	37	42	44	91.5	49.5	4.09747	25.6092	2.65017	42.6667	10.4286
PHA13699	4	5	3	9.25	12.9733	2	120.003	52.045	13	44.5	30.06	23.425	6.635	3.4	2.28	0.775	9	40	45.5	45.5	99	53.5	3.15712	19.732	2.53326	43.2875	13.711
PHA13963	3	1	3	7.3	13.22	2	96.506	40.075	8.5	36	21.46	14.4	7.06	4.35	2.6	0.67	10.5	36.5	41.5	44	115	73.5	3.7512	23.445	2.61398	43.0513	11.4775
PHA13964	3	1	1	7.6	14.95	2	113.62	37.23	7	22.5	14.065	8.525	5.54	3.21	1.985	0.6	9	37	42	44	114	72	3.8836	24.2725	2.62775	42.6026	10.9696
PHA13980	4	2	3	7.1	9.12667	1	64.7993	18.69	12.5	77	18.735	14.415	4.32	6.23	1.505	0.77	8	48	51	51	101.5	50.5	3.57807	22.3629	2.62007	43.0682	12.0371
PHA13981	4	1	3	7.15	13.295	2	95.0593	27.785	6.5	19.5	8.065	5.42	2.645	3.015	1.245	0.67	10	61.5	63.5	63.5	110.5	47	3.15033	19.6896	2.56626	42.552	13.5067
PHA14013	3	1	2	9.2	14.57	3	134.044	45.565	6.5	28	16.79	12.86	3.93	4.29	2.535	0.77	10	35	40.5	44	92	51.5	3.33025	20.8141	2.62807	43.4326	13.0431
PHA1511	4	9	3	6.95	10.7533	1	74.7357	24.98	10.5	73	25.11	18.185	6.925	6.94	2.4	0.725	8	46	48	48	95.5	47.5	3.33025	20.8141	2.70623	43.3145	13.0072
PHA1029	3	1	2	7.8	13.9217	2	108.589	45.725	7	23	13.35	10.67	2.68	3.4	1.915	0.805	8	34	37	44	97.5	60.5	3.8836	24.2725	2.62711	43.3921	11.1734
PHA1052	1	1	2	8.05	12.2033	2	98.2368	38.89	9	28.5	13.665	11.24	2.425	3.17	1.52	0.815	9.5	38	42	44	100	58	4.88844	30.5528	2.69374	43.6586	8.933
PHA1072	3	2	3	8.3	17.4683	3	144.987	68.015	8	24.5	22.225	16.81	5.415	3.07	2.755	0.76	8	35.5	39	44	102.5	63.5	3.60523	22.5327	2.62071	43.6383	12.1054
PHA1077	1	3	3	7.6	15.5883	2	118.471	44.095	9.5	33	19.185	13.925	5.26	3.3	1.955	0.745	12	36	41.5	44	95	53.5	3.4287	21.4294	2.51949	43.4798	12.6815
PHA1092	1	1	3	8.7	17.9333	3	156.02	54.52	5	14.5	12.25	7.895	4.355	2.9	2.45	0.64	9	41	57	57	121	64	3.87002	24.1876	2.63384	44.1511	11.4156
PHA1132	1	1	3	8.55	16.1983	3	138.496	66.115	5	16.5	14.405	11.255	3.15	3.31	2.785	0.79	9.5	35.5	39.5	44	93	53.5	5.79824	36.239	2.77189	44.6909	7.70855
PHA1459	1	1	3	8	16.375	3	131	50.32	10	28.5	19.22	13.95	5.27	2.845	1.955	0.725	9.5	40.5	44.5	46	113	68.5	3.61541	22.5963	2.67228	43.7126	12.0923
PHA2177	1	5	3	8.35	14.7867	3	123.469	50.86	6.5	22.5	15.97	11.935	4.035	3.3	2.19	0.78	9	35.5	40	44	96.5	56.5	3.51577	21.9736	2.55605	44.6342	12.6922

## Sheet: Table_S4
Table S4 Distribution of SNPs across chromosomes before and after quality control
#	Total Number of SNPs	Number of Polymorphic SNPs
Chr01	103	88
Chr02	113	95
Chr03	102	86
Chr04	59	48
Chr05	74	58
Chr06	81	77
Chr07	99	83
Chr08	97	83
Chr09	120	101
Chr10	100	82
Chr11	80	66
Total	1028	867

## Sheet: Table_S5
Supplementary Table S5 Summary of significant QTL for sixteen traits identified by GWAS using 867 polymorphic SNPs
Trait	Abbreviations	SNP	Chromosome	Position	P value	MAF	% Variance Explained	QTL ID	QTL start	QTL end
Growth habit	GH	ANNZ01010088-1_7530	3	43205704	4.67321e-06	0.223958	21.239	qGH-a	43205704	46054732
Pod colour	PC	ANNZ01005781-1_5341	2	24689664	1.33794e-06	0.0842391	7.79706	qPC-a	23189664	26189664
Pod colour	PC	ANNZ01006663-1_18464	2	43001848	3.76555e-05	0.122283	3.72511	qPC-b	41501848	44501848
Pod colour	PC	ANNZ01024116-1_6815	8	3197078	2.86582e-08	0.25	6.63147	qPC-c	1697078	4697078
Pod shattering	PS	ANNZ01003958-1_144371	1	51787008	6.62259e-10	0.154891	5.73532	qPS-a	50287008	53287008
Pod shattering	PS	ANNZ01006201-1_25039	2	33268254	5.31669e-06	0.432065	6.85194	qPS-b	31768254	34768254
Pod shattering	PS	ANNZ01010608-1_38908	4	2294146	5.0959e-05	0.144022	1.59025	qPS-c	794146	3794146
Pod shattering	PS	ANNZ01014482-1_64099	5	1608022	2.00891e-05	0.453804	3.26928	qPS-d	108022	3108022
Pod shattering	PS	ANNZ01017877-1_69518	5	39292843	2.62496e-05	0.320652	3.41905	qPS-e	39080203	39322303
Pod shattering	PS	ANNZ01035679-1_58201	11	9977250	2.73688e-07	0.0625	8.40559	qPS-f	8477250	11477250
Seed length	SL	ANNZ01020465-1_6904	7	11061315	2.70241e-08	0.09375	36.59	qSL-a	7759866	11388741
Seed diameter	SDia	ANNZ01010814-1_29285	4	5400710	4.5878e-06	0.174479	7.11862	qSDia-a	3900710	6900710
Seed diameter	SDia	ANNZ01029083-1_42739	8	58678386	2.12229e-05	0.200521	2.85635	qSDia-b	57178386	60178386
Seed diameter	SDia	ANNZ01030909-1_52645	9	32748073	5.62483e-05	0.325521	2.53198	qSDia-c	31248073	34248073
Seed diameter	SDia	ANNZ01035120-1_12648	10	38996938	5.0529e-05	0.203125	6.46824	qSDia-d	38455127	39386097
Seed diameter	SDia	ANNZ01035204-1_116651	10	41187296	1.28716e-06	0.273438	4.04969	qSDia-e	39687296	42687296
Seed number	SN	ANNZ01010381-1_81553	3	50120699	7.12829e-06	0.0765027	27.8079	qSN-a	48620699	51620699
Pod number	PN	ANNZ01004031-1_17029	2	1695436	2.51611e-06	0.407104	3.03292	qPN-a	530960	2859912
Pod number	PN	ANNZ01007005-1_1045	3	5023787	2.57606e-05	0.0928962	12.2037	qPN-b	4109909	5937665
Pod number	PN	ANNZ01014850-1_7693	5	8378573	2.77873e-06	0.303279	11.9163	qPN-c	6878573	9878573
Pod number	PN	ANNZ01029785-1_35256	9	7666764	2.81886e-07	0.311475	8.33339	qPN-d	6166764	9166764
Average pod weight	APWT	ANNZ01029931-1_13946	9	10689027	1.68457e-05	0.240437	7.69461	qAPWT-a	10186218	10797412
Average pod weight	APWT	ANNZ01035748-1_24240	11	11109928	1.218e-08	0.289617	22.6612	qAPWT-b	11109928	13903039
Pod harvest index	PHI	ANNZ01006791-1_83511	2	48030706	8.15109e-08	0.404372	40.1658	qPHI-a	46530706	49530706
Germination time	GD	ANNZ01005923-1_13359	2	27287052	3.00495e-06	0.416667	3.06618	qGD-a	25787052	28787052
Germination time	GD	ANNZ01006237-1_2348	2	34002403	4.40413e-07	0.0677083	19.4824	qGD-b	32502403	35502403
Germination time	GD	ANNZ01031212-1_4305	10	2538255	5.75122e-07	0.302083	1.88857	qGD-c	1038255	4038255
Days to bud initiation	DTBI	ANNZ01000401-1_39766	1	9952427	2.32946e-05	0.21875	0.760546	qDTBI-a	8452427	11452427
Days to bud initiation	DTBI	ANNZ01029668-1_13975	9	5345844	3.91804e-05	0.296875	0.455885	qDTBI-b	5291570	7288943
Days to bud initiation	DTBI	ANNZ01030214-1_32405	9	16814475	3.2654e-05	0.286458	1.99905	qDTBI-c	15117758	17148355
Days to bud initiation	DTBI	ANNZ01032806-1_29491	10	19194497	4.3995e-14	0.0911458	0.471456	qDTBI-d	19194497	21438510
Days to bud initiation	DTBI	ANNZ01032872-1_34481	10	19760331	4.3995e-14	0.0911458	1.25477	qDTBI-e	18260331	22507220
Days to bud initiation	DTBI	ANNZ01033050-1_9357	10	20935383	4.3995e-14	0.0911458	0.131723	qDTBI-e	18260331	22507220
Days to bud initiation	DTBI	ANNZ01033058-1_25048	10	21007220	4.3995e-14	0.0911458	27.055	qDTBI-e	18260331	22507220
Days to bud initiation	DTBI	ANNZ01033519-1_19652	10	24784884	4.3995e-14	0.0911458	8.34265	qDTBI-f	23284884	27249664
Days to bud initiation	DTBI	ANNZ01033539-1_5984	10	24910594	4.3995e-14	0.0911458	1.06858e-07	qDTBI-f	23284884	27249664
Days to bud initiation	DTBI	ANNZ01033700-1_4137	10	25749664	2.70375e-15	0.09375	38.447	qDTBI-f	23284884	27249664
Days to bud initiation	DTBI	ANNZ01035181-1_8815	10	40587960	1.15806e-06	0.486979	0.497464	qDTBI-g	39087960	42087960
First flowering time	FFT	ANNZ01000401-1_39766	1	9952427	5.31981e-05	0.21875	0.83867	qFFT-a	8452427	11452427
First flowering time	FFT	ANNZ01032806-1_29491	10	19194497	2.16077e-13	0.0911458	1.75362	qFFT-b	19194497	21438510
First flowering time	FFT	ANNZ01032872-1_34481	10	19760331	2.16077e-13	0.0911458	0.00490842	qFFT-c	18260331	22507220
First flowering time	FFT	ANNZ01033050-1_9357	10	20935383	2.16077e-13	0.0911458	3.0003	qFFT-c	18260331	22507220
First flowering time	FFT	ANNZ01033058-1_25048	10	21007220	2.16077e-13	0.0911458	32.8411	qFFT-c	18260331	22507220
First flowering time	FFT	ANNZ01033519-1_19652	10	24784884	2.16077e-13	0.0911458	0.665059	qFFT-d	21919010	24910594
First flowering time	FFT	ANNZ01033539-1_5984	10	24910594	2.16077e-13	0.0911458	0.0657056	qFFT-e	23410594	27249664
First flowering time	FFT	ANNZ01033700-1_4137	10	25749664	1.48486e-14	0.09375	40.2427	qFFT-e	23410594	27249664
First flowering time	FFT	ANNZ01035181-1_8815	10	40587960	1.1075e-06	0.486979	0.27678	qFFT-f	39087960	42087960
Flowering time	FT	ANNZ01000401-1_39766	1	9952427	1.34469e-06	0.21875	0.47548	qFT-a	8452427	11452427
Flowering time	FT	ANNZ01006237-1_2348	2	34002403	4.34832e-05	0.0677083	1.4169	qFT-b	32502403	35502403
Flowering time	FT	ANNZ01029668-1_13975	9	5345844	1.35101e-06	0.296875	2.54048	qFT-c	5291570	7288943
Flowering time	FT	ANNZ01032806-1_29491	10	19194497	1.66413e-15	0.0911458	0.000132962	qFT-d	19194497	21438510
Flowering time	FT	ANNZ01032872-1_34481	10	19760331	1.66413e-15	0.0911458	16.8591	qFT-e	18260331	22507220
Flowering time	FT	ANNZ01033050-1_9357	10	20935383	1.66413e-15	0.0911458	5.45333	qFT-e	18260331	22507220
Flowering time	FT	ANNZ01033058-1_25048	10	21007220	1.66413e-15	0.0911458	1.26448	qFT-e	18260331	22507220
Flowering time	FT	ANNZ01033519-1_19652	10	24784884	1.66413e-15	0.0911458	12.1519	qFT-f	24249664	27249664
Flowering time	FT	ANNZ01033539-1_5984	10	24910594	1.66413e-15	0.0911458	3.035	qFT-g	23410594	27249664
Flowering time	FT	ANNZ01033700-1_4137	10	25749664	1.15804e-16	0.09375	38.5032	qFT-g	23410594	27249664
Flowering time	FT	ANNZ01035181-1_8815	10	40587960	6.45154e-08	0.486979	0.332237	qFT-h	39087960	42087960
Flowering time	FT	ANNZ01035537-1_69566	11	7406546	7.54618e-07	0.0703125	2.01234	qFT-i	5906546	8906546
Days to maturity	DTM	ANNZ01004092-1_44878	2	3633844	3.30019e-05	0.489583	3.23724	qDTM-a	2133844	5133844
Days to maturity	DTM	ANNZ01014323-1_16259	4	43868165	2.03438e-05	0.263021	11.1502	qDTM-b	42368165	45368165
Days to maturity	DTM	ANNZ01020680-1_5025	7	14272971	2.09176e-07	0.369792	4.91792	qDTM-c	12529712	15316545
Days to maturity	DTM	ANNZ01031227-1_69284	10	2922632	1.97903e-05	0.0729167	3.73494	qDTM-d	1422632	4422632
Days to maturity	DTM	ANNZ01035063-1_115400	10	37989134	4.82929e-07	0.46875	8.82771	qDTM-e	36489134	39489134
Days to maturity	DTM	ANNZ01035064-1_81472	10	38153225	3.66964e-07	0.453125	3.05122	qDTM-e	36489134	39489134
Days to maturity	DTM	ANNZ01035080-1_11042	10	38455127	3.47242e-10	0.486979	0.929789	qDTM-f	38455127	39386097
Days to maturity	DTM	ANNZ01039785-1_18579	11	47398473	3.01366e-05	0.114583	4.83122	qDTM-g	45898473	48898473
Seed sulfur content	Sulfur	ANNZ01020225-1_40271	7	6384905	0.00152015	0.35989	4.20183	qSulfur-a	4742187	7406552
Seed sulfur content	Sulfur	ANNZ01031227-1_69284	10	2922632	0.00118022	0.0769231	4.39709	qSulfur-b	1422632	4422632
Seed sulfur content	Sulfur	ANNZ01035357-1_7824	11	3190094	0.000143309	0.354396	6.03535	qSulfur-c	1690094	4690094
Seed protein content	Protein	ANNZ01003955-1_215378	1	51557213	0.00122508	0.296703	5.59669	qProtein-a	50057213	53057213
Seed protein content	Protein	ANNZ01003958-1_11099	1	51653736	0.00215107	0.368132	5.08067	qProtein-a	50057213	53057213
Seed protein content	Protein	ANNZ01004559-1_55436	2	8879246	0.00212765	0.348901	3.45876	qProtein-b	8879246	9610369
Seed protein content	Protein	ANNZ01004710-1_1656	2	10616898	0.001934	0.304945	3.05771	qProtein-c	10070116	11762500

## Sheet: Table_S6
Supplementary Table S6 Summary of candidate gene models showing the A. thaliana best hit gene, Gene Ontology term and function (see also table 2)
Trait	Associated SNP ID	Chromosome	SNP position	QTL ID	Distance of SNP to gene start in kbp	Gene start position	Gene end position	Locus name	Best hit AT gene	AT encoded protein	Gene function in AT/GO analysis	Reference on gene function/involved biological processes
PC	ANNZ01024116-1_6815	8	3197078	qPC-c	25.706	3171372	3172441	Phvul.008G038200	AT1G66370.1	myb domain protein 113	regulates anthocyanin biosynthesis	Gonzalez et al. (2008)
PC	ANNZ01024116-1_6815	8	3197078	qPC-c	8.395	3188683	3190957	Phvul.008G038400	AT1G66370.1	myb domain protein 113	regulates anthocyanin biosynthesis	Gonzalez et al. (2008)
PC	ANNZ01024116-1_6815	8	3197078	qPC-c	23.793	3220871	3221951	Phvul.008G038600	AT1G66370.1	myb domain protein 113	regulates anthocyanin biosynthesis	Gonzalez et al. (2008)
PS	ANNZ01010608-1_38908	4	2294146	qPS-c	28.495	2265651	2271108	Phvul.004G019300	AT3G28150.1	TRICHOME BIREFRINGENCE-LIKE 22	Involved in xyloglucan metabolic process	Gille et al. (2011)
PS	ANNZ01010608-1_38908	4	2294146	qPS-c	23.962	2318108	2321621	Phvul.004G019600	AT3G28180.1	Cellulose-synthase-like C4	functions in cell wall modifications associated with pod shattering	Dong et al. (2017)
SDia	ANNZ01035120-1_12648	10	38996938	qSDia-d	71.642	39068580	39070130	Phvul.010G114300	AT2G45360.1	Protein of unknown function (DUF1442)	regulate seed maturation	Francisco et al. (2016); Briggs et al. (2017)
SDia	ANNZ01035204-1_116651	10	41187296	qSDia-e	78.548	41108748	41112395	Phvul.010G130000	AT3G13960.1	growth-regulating factor 5	regulates seed sizes via cell wall expansion	Wang et al. (2015)
PN	ANNZ01014850-1_7693	5	8378573	qPN-c	62.791	8315782	8320930	Phvul.005G059400	AT1G79200.1	STIGMA/STYLE CELL-CYCLE INHIBITOR 1	Involved in style, stigma amd gynoecium development	-
GD	ANNZ01031212-1_4305	10	2538255	qGD-c	65.821	2604076	2606630	Phvul.010G017600	AT4G25000.1	alpha-amylase-like	associated with the onset of suspensor and endosperm programmed cell death and early nutrient mobilization to nourish the growing embryo.	Sreenivasulu and Wobus (2013); Moghaddam et al. (2016)
DTBI	ANNZ01035181-1_8815	10	40587960	qDTBI-g	88.108	40676068	40683596	Phvul.010G125600	AT1G72390.1	PHYTOCHROME-DEPENDENT LATE-FLOWERING	accelerates in flowering	Endo et al. (2013)
FFT	ANNZ01035181-1_8815	10	40587960	qFFT-f	88.108	40676068	40683596	Phvul.010G125600	AT1G72390.1	PHYTOCHROME-DEPENDENT LATE-FLOWERING	accelerates in flowering	Endo et al. (2013)
FT	ANNZ01035181-1_8815	10	40587960	qFT-h	88.108	40676068	40683596	Phvul.010G125600	AT1G72390.1	PHYTOCHROME-DEPENDENT LATE-FLOWERING	accelerates in flowering	Endo et al. (2013)
Sulfur	ANNZ01020225-1_40271	7	6384905	qSulfur-a	43.024	6427929	6431822	Phvul.007G069600	AT4G25570.1	Cytochrome b561/ferric reductase transmembrane protein family	involved in sulfur metabolic process	Depuydt and Vandepoele (2021)
Protein	ANNZ01004559-1_55436	2	8879246	qProtein-b	96.042	8975288	8979861	Phvul.002G066300	AT1G07040.1	protein coding	involved in organonitrogen catabolic process	Depuydt and Vandepoele (2021)
Gonzalez, A., Zhao, M., Leavitt, J.M. and Lloyd, A.M. (2008). Regulation of the anthocyanin biosynthetic pathway by the TTG1/bHLH/Myb transcriptional complex in Arabidopsis seedlings. Plant J. 53, 814-827. doi: 10.1111/j.1365-313X.2007.03373.x
Gille, S., de Souza, A., Xiong, G., Benz, M., Cheng, K., Schultink, A., Reca, I.-B., and Pauly, M. (2011). O-Acetylation of Arabidopsis Hemicellulose Xyloglucan Requires AXY4 or AXY4L, Proteins with a TBL and DUF231 Domain. The Plant Cell 23, 4041-4053. doi: 10.1105/tpc.111.091728
Dong, R., Dong, D., Luo, D., Zhou, Q., Chai, X., Zhang, J., Xie, W., Liu, W., Dong, Y., Wang, Y., and Liu, Z. (2017). Transcriptome Analyses Reveal Candidate Pod Shattering-Associated Genes Involved in the Pod Ventral Sutures of Common Vetch (Vicia sativa L.). Front. Plant Sci. 8, 649. doi: 10.3389/fpls.2017.00649
Francisco, M., Joseph, B., Caligagan, H., Li, B., Corwin, J.A., Lin, C., Kerwin, R.E., Burow, M., and Kliebenstein, D.J. (2016). Genome Wide Association Mapping in Arabidopsis thaliana Identifies Novel Genes Involved in Linking Allyl Glucosinolate to Altered Biomass and Defense. Front. Plant Sci. 7, 1010. 10.3389/fpls.2016.01010
Briggs, A.G., Adams-Phillips, L.C., Keppler, B.D., Zebell, S.G., Arend, K.C., Apfelbaum, A.A., Smith, J.A., and Brent, A.F. (2017). A transcriptomics approach uncovers novel roles for poly(ADP-ribosyl)ation in the basal defense response in Arabidopsis thaliana. PLoS ONE 12, e0190268. doi 10.1371/journal.pone.0190268
Wang, Q., Xue, X., Li, Y., Dong, Y., Zhang, L., Zhou, Q., Deng, F., Ma, Z., Qiao, D., Hu, C. and Ren, Y. (2015), A maize ADP-ribosylation factor ZmArf2 increases organ and seed size by promoting cell expansion in Arabidopsis. Physiol. Plantarum 156: 97-107. doi: 10.1111/ppl.12359
Sreenivasulu, N., and Wobus, U. (2013). Seed-development programs: A systems biology-based comparison between dicots and monocots. Annu. Rev. Plant Biol. 64, 189-217. doi:10.1146/annurev-arplant-050312-120215
Moghaddam, S.M., Mamidi, S., Osorno, J.M., Lee, R., Brick, M., Kelly, J., Miklas, P., Urrea, C., Song, Q., Cregan, P., Grimwood, J., Schmutz, J., and McClean, P.E. (2016). Genome-wide association study identifies candidate loci underlying agronomic traits in a middle American diversity panel of common bean. Plant Genome 9, 1-21. doi: 10.3835/plantgenome2016.02.0012
Endo, M., Tanigawa, Y., Murakami, T., Araki, T., and Nagatani, A. (2013). PHYTOCHROME-DEPENDENT LATE-FLOWERING accelerates flowering through physical interactions with phytochrome B and CONSTANS. PNAS 110, 18017-18022. doi: 10.1073/pnas.1310631110
Depuydt, T. and Vandepoele, K. (2021), Multi-omics network-based functional annotation of unknown Arabidopsis genes. Plant J. 108, 1193-1212. doi: 10.1111/tpj.15507

## Sheet: Table_S7
Supplementary Table S7 Raw SNP data following targeted genotyping-by-sequencing of 200 common bean genotypes. The last part of the genotype sample name refers to the common bean accession in the genotype list (for details see Supplementary Table S1). Chromosome positions are given for reference genome G19833v2.1
Chromosome	Position	SNP ID	Reference allele	Alternate allele(s)	Filter(s)	NCB1	NCB12	ALB213	BAT332	G5686	KATB1	MAR001	MAZ162	MAZ171	MNC257	NUA457	RWR2154	NCB3	NCB13	ALB67	BAT477	G2333	KIANGALA	MAZ154	MAZ163	MBC26	MNC358	NUA561	RWR2245	NCB4	NCB14	ALB123	BFS10	GITANGA	MAB351	MAZ155	MAZ165	MBC36	MONTCALM	NUC168	RWR719	NCB7	NCB15	NGS1738-ALB21	BFS32	GLORIA	MAB352	MAZ156	MAZ166
Pv01	294449	ANNZ01000022-1_65403	GT	G;AT	.	AT/AT	GT/G	GT/GT	GT/GT	GT/GT	GT/GT	GT/GT	GT/GT	GT/AT	GT/GT	GT/GT	GT/GT	GT/GT	AT/AT	GT/GT	GT/GT	AT/AT	AT/AT	GT/GT	GT/GT	GT/GT	GT/GT	GT/GT	GT/GT	GT/G	AT/AT	AT/AT	AT/AT	GT/GT	AT/AT	GT/GT	GT/GT	GT/GT	GT/GT	GT/GT	GT/GT	GT/G	GT/G	GT/GT	AT/AT	GT/GT	AT/AT	GT/GT	GT/GT
Pv01	361504	ANNZ01000022-1_132458	A	C	.	.	.	.	.	C/C	A/A	.	A/A	A/A	A/A	C/C	A/A	C/C	.	.	.	.	.	A/A	A/A	A/A	A/A	C/C	C/C	.	.	.	.	C/C	.	A/A	A/A	A/A	C/C	A/A	.	.	.	.	.	A/A	.	A/A	C/C
Pv01	553460	ANNZ01000026-1_4251	A	G	.	A/A	.	A/A	A/A	A/A	A/A	A/A	A/A	A/A	A/A	A/A	A/A	A/A	A/A	A/A	A/A	A/A	A/A	A/A	A/A	A/A	A/A	A/A	A/G	A/A	A/A	A/A	A/A	G/G	A/A	A/A	A/A	A/A	G/G	A/A	A/A	.	.	A/A	A/A	A/A	A/A	A/A	G/G
Pv01	772953	ANNZ01000037-1_22634	A	C	.	C/C	.	.	.	C/C	A/A	C/C	A/A	A/A	A/A	C/C	A/A	A/A	.	.	.	C/C	.	A/A	A/A	A/A	A/A	C/C	A/C	.	C/C	.	C/C	A/A	C/C	A/A	A/A	A/A	C/C	A/A	.	.	.	.	C/C	A/A	C/C	A/A	C/C
Pv01	857020	ANNZ01000038-1_21544	G	T	.	G/G	.	T/T	T/T	G/G	G/G	T/T	G/G	G/T	G/G	G/G	G/G	G/G	T/T	T/T	T/T	G/G	G/G	G/G	G/G	G/G	G/G	G/G	G/G	.	T/T	T/T	T/T	G/G	T/T	G/G	G/G	G/G	G/G	G/G	T/T	.	.	T/T	T/T	G/G	T/T	G/G	G/G
Pv01	927077	ANNZ01000043-1_7041	G	A	.	G/G	.	.	G/G	G/G	G/G	G/G	G/G	G/G	G/G	A/A	G/G	G/G	G/G	.	G/G	G/G	G/G	G/G	G/G	G/G	G/G	A/A	G/A	.	G/G	G/G	G/G	G/G	G/G	G/G	G/G	G/G	A/A	G/G	G/G	.	.	.	G/G	G/G	G/G	G/G	A/A
Pv01	1424538	ANNZ01000046-1_131509	G	A	.	.	.	.	.	A/A	A/A	.	A/A	G/G	A/A	A/A	G/G	G/G	.	.	.	.	.	G/G	G/A	A/A	A/A	G/G	G/A	.	.	.	.	G/G	.	G/G	A/A	G/G	G/G	G/G	.	.	.	.	.	A/A	.	G/G	G/G
Pv01	1652926	ANNZ01000050-1_86184	G	A	.	G/G	.	A/A	G/G	G/G	A/A	G/G	A/A	G/A	A/A	G/G	A/A	G/G	G/G	A/A	G/G	G/G	G/G	A/A	G/A	A/A	A/A	G/G	G/A	.	G/G	G/G	G/G	G/G	G/G	A/A	A/A	A/A	G/G	A/A	G/G	.	.	A/A	G/G	A/A	G/G	A/A	G/G
Pv01	2153412	ANNZ01000070-1_4704	G	A	.	G/G	.	G/G	G/G	G/G	G/G	G/G	G/A	G/A	G/G	G/G	A/A	G/G	G/G	G/G	G/G	G/G	G/G	A/A	G/G	G/G	G/G	G/G	G/G	G/G	G/G	G/G	G/G	G/G	G/G	A/A	G/G	A/A	G/G	A/A	G/G	.	.	G/G	G/G	A/A	G/G	A/A	G/G
Pv01	2492026	ANNZ01000089-1_8746	T	A	.	A/A	A/A	A/A	A/A	T/T	T/T	A/A	T/T	T/A	T/T	A/A	T/T	T/T	A/A	A/A	A/A	A/A	A/A	T/T	T/T	T/T	T/T	T/T	T/T	A/A	A/A	A/A	A/A	T/T	A/A	T/T	T/T	T/T	T/T	T/T	A/A	A/A	A/A	A/A	A/A	T/T	A/A	T/T	T/T
Pv01	2691535	ANNZ01000097-1_78827	T	C	.	C/C	.	C/C	C/C	T/T	T/T	C/C	T/C	C/C	T/T	C/C	C/C	C/C	C/C	.	C/C	C/C	C/C	C/C	T/T	T/T	T/T	T/T	T/T	.	C/C	C/C	C/C	T/T	C/C	C/C	T/T	T/T	T/T	T/T	C/C	.	.	.	C/C	C/C	C/C	C/C	T/T
Pv01	2759153	ANNZ01000098-1_53688	G	T	.	G/G	G/G	G/G	G/G	G/G	T/T	G/G	G/T	G/G	T/T	G/G	G/G	T/T	G/G	G/G	G/G	G/G	G/G	G/G	G/T	T/T	T/T	G/G	T/T	G/G	G/G	G/G	G/G	G/G	G/G	G/G	T/T	T/T	T/T	G/G	G/G	G/G	G/G	G/G	G/G	G/G	G/G	G/G	T/T
Pv01	2970282	ANNZ01000106-1_26375	G	A	.	A/A	A/A	G/G	A/A	G/G	G/G	A/A	G/G	G/A	G/G	A/A	G/G	G/G	A/A	G/G	A/A	A/A	A/A	G/G	G/G	G/G	G/G	G/G	G/G	A/A	G/G	G/A	A/A	G/G	A/A	G/G	G/G	G/G	G/G	G/G	A/A	A/A	A/A	A/A	A/A	G/G	A/A	G/G	G/G
Pv01	3076313	ANNZ01000112-1_12355	G	A	.	G/G	G/G	A/A	A/A	G/G	A/A	G/G	G/G	G/G	A/A	A/A	G/G	A/A	G/G	A/A	G/G	G/G	A/A	G/G	G/G	A/A	A/A	G/G	A/A	G/G	A/A	A/A	A/A	A/A	G/G	G/G	A/A	A/A	A/A	G/G	A/A	G/G	.	.	A/A	G/G	G/G	G/G	A/A
Pv01	3291946	ANNZ01000124-1_4207	C	T	.	.	.	.	.	C/C	T/T	.	C/T	C/C	T/T	.	C/C	C/C	.	.	.	.	.	C/C	C/T	T/T	T/T	C/C	T/T	.	.	.	.	C/C	.	C/C	T/T	C/C	T/T	C/C	.	.	.	.	.	C/C	.	C/C	C/C
Pv01	3389938	ANNZ01000128-1_35160	G	A	.	A/A	.	A/A	A/A	G/G	A/A	A/A	G/A	G/A	A/A	A/A	G/G	A/A	A/A	A/A	A/A	A/A	A/A	G/G	G/A	A/A	A/A	G/G	A/A	.	A/A	A/A	A/A	A/A	A/A	G/G	A/A	G/G	A/A	A/A	A/A	.	.	.	A/A	G/G	A/A	G/G	G/G
Pv01	3483756	ANNZ01000128-1_128918	G	A	.	A/A	G/G	A/A	G/G	G/G	G/G	G/G	G/G	G/A	G/G	A/A	G/G	G/G	A/A	A/A	G/G	A/A	G/G	G/G	G/G	G/G	G/G	G/G	G/G	G/G	G/G	A/A	G/G	G/G	A/A	G/G	G/G	G/G	G/G	G/G	A/A	G/G	G/G	G/G	G/G	G/G	A/A	G/G	G/G
Pv01	3563779	ANNZ01000130-1_17721	T	C	.	C/C	C/C	C/C	T/T	T/T	T/T	T/T	T/T	T/C	T/T	C/C	T/T	T/T	T/T	C/C	T/T	C/C	T/T	T/T	T/T	T/T	T/T	T/T	T/T	C/C	T/T	C/C	T/T	T/T	C/C	T/T	T/T	T/T	T/T	T/T	C/C	C/C	C/C	C/C	T/T	T/T	C/C	T/T	T/T
Pv01	3608026	ANNZ01000130-1_62028	T	G	.	G/G	T/T	G/G	T/T	T/T	T/T	T/T	T/T	T/G	T/T	G/G	T/T	T/T	G/G	G/G	T/T	G/G	T/T	T/T	T/T	T/T	T/T	T/T	T/T	T/T	T/T	T/G	T/T	T/T	G/G	T/T	T/T	T/T	T/T	T/T	T/T	T/T	T/T	T/T	T/T	T/T	G/G	T/T	T/T
Pv01	3862571	ANNZ01000144-1_84427	G	T	.	G/G	G/G	G/G	T/T	G/G	G/G	G/G	G/G	G/G	G/G	G/G	G/G	G/G	G/G	G/G	G/G	G/G	G/G	G/G	G/G	G/G	G/G	G/G	G/G	G/G	G/G	G/G	T/T	G/G	G/G	G/G	G/G	G/G	G/G	G/G	G/G	G/G	G/G	G/G	T/T	G/G	G/G	G/G	G/G
Pv01	4147143	ANNZ01000155-1_24965	G	A	.	G/G	G/A	G/G	A/A	G/G	G/G	A/A	G/G	G/G	G/G	G/G	G/G	G/G	G/G	G/G	A/A	G/G	G/G	G/G	G/G	G/G	G/G	G/G	G/G	.	A/A	G/A	G/G	G/G	A/A	G/G	G/G	G/G	G/G	A/A	A/A	.	.	G/G	G/G	G/G	A/A	G/G	G/G
Pv01	4388509	ANNZ01000156-1_219458	T	C	.	T/T	.	T/T	T/T	T/T	T/T	T/T	T/T	T/T	T/T	T/T	T/T	T/T	T/T	T/T	T/T	T/T	T/T	T/T	T/T	T/T	T/T	T/T	T/T	.	C/C	T/T	T/T	T/T	T/T	T/T	T/T	T/T	T/T	T/T	T/T	.	.	T/T	T/T	T/T	T/T	T/T	T/T
Pv01	4420843	ANNZ01000156-1_251792	G	T	.	T/T	T/T	G/G	T/T	G/G	G/G	T/T	G/G	G/G	G/G	G/G	G/G	G/G	G/G	G/G	T/T	G/G	G/G	G/G	G/G	G/G	G/G	G/G	G/G	T/T	G/G	G/G	T/T	G/G	G/G	G/G	G/G	G/G	G/G	T/T	G/G	T/T	T/T	T/T	T/T	G/G	G/G	G/G	G/G
Pv01	4550810	ANNZ01000163-1_4819	G	A	.	G/G	G/A	G/G	A/A	G/G	G/G	A/A	G/G	G/G	A/A	G/G	G/G	G/G	G/G	G/G	A/A	G/G	G/G	G/G	G/G	A/A	G/G	G/G	G/G	.	A/A	G/A	G/G	G/G	G/G	G/G	G/G	G/G	G/G	G/G	A/A	.	.	G/G	G/G	G/G	G/G	G/G	A/A
Pv01	4666961	ANNZ01000165-1_19853	A	G	.	G/G	.	A/A	G/G	A/A	A/A	G/G	A/A	A/A	G/G	A/A	A/A	A/A	A/A	A/A	G/G	A/A	A/A	A/A	A/A	G/G	A/A	A/A	A/A	.	G/G	A/G	A/A	A/A	A/A	A/A	A/A	A/A	A/A	A/A	G/G	.	.	G/G	A/A	A/A	A/A	A/A	G/G
Pv01	4774853	ANNZ01000167-1_74317	C	T	.	C/C	.	C/C	T/T	C/C	C/C	T/T	C/C	C/C	T/T	C/C	C/C	C/C	C/C	C/C	T/T	C/C	C/C	C/C	C/C	T/T	C/C	C/C	C/C	C/T	T/T	C/T	C/C	C/C	C/C	C/C	C/C	C/C	C/C	C/C	T/T	.	.	.	C/C	C/C	C/C	C/C	T/T
Pv01	4898602	ANNZ01000168-1_78934	T	C	.	C/C	.	.	T/T	T/T	T/T	T/T	T/T	T/C	T/T	C/C	T/T	T/T	C/C	C/C	T/T	C/C	C/C	T/T	T/T	T/T	T/T	T/T	T/T	.	T/T	T/C	C/C	T/T	C/C	T/T	T/T	T/T	T/T	C/C	T/T	.	.	.	C/C	T/T	C/C	T/T	T/T
Pv01	4986415	ANNZ01000168-1_166747	G	T	.	G/G	.	.	T/T	G/G	G/G	T/T	G/G	G/G	G/T	G/G	G/G	G/G	G/G	G/G	T/T	T/T	T/T	G/G	G/G	G/T	G/G	G/G	G/G	.	T/T	G/T	G/G	G/G	G/G	G/G	G/G	G/G	G/G	T/T	G/T	.	.	.	G/G	G/G	G/G	G/G	G/T
Pv01	5560178	ANNZ01000195-1_42363	T	C	.	C/C	C/C	C/C	C/C	T/T	T/T	C/C	T/T	T/T	C/C	T/T	T/T	T/T	C/C	T/T	C/C	C/C	C/C	T/T	T/T	C/C	C/C	T/T	T/T	C/C	C/C	T/C	T/T	T/T	C/C	T/T	T/T	T/T	T/T	T/T	C/C	C/C	C/C	C/C	T/T	T/T	C/C	T/T	C/C
Pv01	5669325	ANNZ01000196-1_28946	A	C	.	C/C	.	.	A/A	A/A	A/A	A/A	A/A	A/A	C/C	A/A	A/A	A/A	C/C	A/A	A/A	C/C	C/C	A/A	A/A	C/C	C/C	A/A	A/A	.	A/A	A/A	A/A	A/A	A/A	A/A	A/A	A/A	A/A	C/C	A/A	.	.	.	A/A	A/A	A/A	A/A	A/A
Pv01	6274915	ANNZ01000222-1_53700	G	T	.	G/G	.	.	T/T	G/G	G/G	T/T	G/G	G/G	G/G	G/G	G/G	G/G	G/G	G/G	T/T	G/G	G/G	G/G	G/G	G/G	G/G	G/G	G/G	.	T/T	G/T	T/T	G/G	T/T	G/G	G/G	G/G	G/G	G/G	T/T	.	.	.	T/T	G/G	T/T	G/G	T/T
Pv01	6373475	ANNZ01000230-1_8523	A	G	.	A/A	.	.	G/G	A/A	A/A	G/G	A/A	A/G	A/A	A/A	A/A	A/A	A/A	G/G	G/G	A/A	A/A	A/A	A/A	A/A	A/A	A/A	A/A	.	G/G	G/G	G/G	A/A	G/G	A/A	A/A	A/A	A/A	A/A	G/G	.	.	.	G/G	A/A	G/G	A/A	G/G
Pv01	6443448	ANNZ01000233-1_23927	G	T	.	T/T	G/G	G/G	G/G	G/G	T/T	G/G	T/T	G/T	T/T	T/T	T/T	T/T	T/T	G/G	G/G	T/T	T/T	T/T	T/T	T/T	T/T	G/G	T/T	G/G	G/G	G/G	G/G	T/T	G/G	T/T	T/T	T/T	T/T	T/T	G/G	G/G	G/G	G/G	G/G	T/T	G/G	T/T	G/G
Pv01	6595199	ANNZ01000236-1_9807	A	G	.	A/A	G/G	.	.	A/A	.	.	A/A	A/G	A/A	.	A/A	A/A	A/A	G/G	G/G	A/A	A/A	A/A	A/A	A/A	.	A/A	A/A	G/G	G/G	G/G	G/G	A/A	.	A/A	A/A	A/A	.	.	.	.	.	G/G	G/G	A/A	.	A/A	.
Pv01	6687924	ANNZ01000239-1_41479	G	T	.	T/T	G/G	G/G	G/G	G/G	T/T	G/G	T/T	G/T	T/T	T/T	T/T	T/T	T/T	G/G	G/G	T/T	T/T	G/G	T/T	T/T	T/T	G/G	T/T	G/G	G/G	G/G	G/G	T/T	G/G	G/G	T/T	T/T	T/T	T/T	G/G	G/G	G/G	G/G	G/G	T/T	G/G	T/T	G/G
Pv01	6772924	ANNZ01000240-1_43550	G	A	.	A/A	.	G/G	A/A	G/G	G/G	A/A	G/G	G/G	G/G	G/G	G/G	G/G	A/A	G/G	A/A	A/A	A/A	G/G	G/G	G/G	G/G	G/G	G/G	.	G/G	G/G	A/A	G/G	A/A	G/G	G/G	G/G	G/G	G/G	G/G	.	.	G/G	A/A	G/G	A/A	G/G	G/G
Pv01	6823270	ANNZ01000240-1_93956	G	A	.	A/A	.	G/G	G/G	G/G	G/G	G/G	G/G	G/G	G/G	G/G	G/G	G/G	A/A	G/G	G/G	A/A	A/A	G/G	G/G	G/G	G/G	G/G	G/G	G/G	G/G	G/G	G/G	G/G	G/G	G/G	G/G	G/G	G/G	G/G	G/G	.	.	.	G/G	G/G	G/G	G/G	G/G
Pv01	6984467	ANNZ01000245-1_1210	C	T	.	C/C	.	T/T	T/T	C/C	C/C	T/T	C/C	C/T	C/C	C/C	C/C	C/C	C/C	T/T	T/T	T/T	T/T	C/C	C/C	C/C	C/C	C/C	C/C	.	T/T	T/T	T/T	C/C	T/T	C/C	C/C	C/C	C/C	C/C	T/T	.	.	C/C	T/T	C/C	T/T	C/C	T/T
Pv01	7092783	ANNZ01000251-1_2650	C	T	.	C/C	.	T/T	T/T	C/C	C/C	T/T	C/C	C/T	C/C	C/C	C/C	C/C	T/T	T/T	T/T	T/T	T/T	C/C	C/C	C/C	C/C	C/C	C/C	C/T	T/T	T/T	T/T	C/C	T/T	C/C	C/C	C/C	C/C	C/C	T/T	.	.	.	T/T	C/C	T/T	C/C	T/T
Pv01	8083368	ANNZ01000301-1_25000	A	G	.	A/A	G/G	G/G	G/G	A/A	A/A	G/G	A/A	A/G	A/A	A/A	A/A	A/A	A/A	G/G	G/G	A/A	A/A	A/A	A/A	A/A	A/A	A/A	A/A	G/G	G/G	G/G	G/G	A/A	G/G	A/A	A/A	A/A	A/A	G/G	G/G	G/G	G/G	G/G	G/G	A/A	G/G	A/A	G/G
Pv01	8199061	ANNZ01000302-1_70599	T	C	.	C/C	T/T	T/T	T/T	T/T	T/T	T/T	T/T	T/T	T/T	T/T	T/T	T/T	C/C	T/T	T/T	C/C	C/C	T/T	T/T	T/T	T/T	T/T	T/T	T/T	C/C	T/T	T/T	T/T	T/T	T/T	T/T	T/T	T/T	T/T	T/T	T/T	T/T	T/T	T/T	T/T	T/T	T/T	T/T
Pv01	8279683	ANNZ01000310-1_967	G	A	.	G/G	.	G/G	G/G	G/G	G/G	G/G	G/G	G/G	G/G	G/G	G/G	G/G	A/A	G/G	G/G	G/G	G/G	G/G	G/G	G/G	G/G	G/G	G/G	.	A/A	G/G	G/G	G/G	G/G	G/G	G/G	G/G	G/G	G/G	G/G	.	.	G/A	G/G	G/G	G/G	G/G	G/G
Pv01	8382518	ANNZ01000313-1_68205	C	T	.	C/C	C/C	C/C	C/C	C/C	C/C	C/C	C/C	C/C	C/C	C/C	C/C	C/C	T/T	C/C	C/C	C/C	C/C	C/C	C/C	C/C	C/C	C/C	C/C	C/C	T/T	C/C	C/C	C/C	C/C	C/C	C/C	C/C	C/C	C/C	C/C	C/C	C/C	C/C	C/C	C/C	C/C	C/C	C/C
Pv01	8487804	ANNZ01000333-1_3059	A	G	.	G/G	.	A/A	A/A	A/A	A/A	A/A	A/A	A/A	A/A	A/A	A/A	A/A	G/G	A/A	A/A	G/G	G/G	A/A	A/A	A/A	A/A	A/A	A/A	.	G/G	A/A	A/A	A/A	A/A	A/A	A/A	A/A	A/A	A/A	A/A	.	.	G/G	A/A	A/A	A/A	A/A	A/A
Pv01	8511631	ANNZ01000333-1_26886	C	T	.	C/C	.	C/T	T/T	C/C	C/C	T/T	C/C	C/T	C/C	C/C	C/C	C/C	C/C	C/T	T/T	C/C	C/C	C/C	C/C	C/C	C/C	C/C	C/C	.	C/C	C/T	C/T	C/C	T/T	C/C	C/C	C/C	C/C	C/T	T/T	.	.	.	C/T	C/C	T/T	C/C	T/T
Pv01	8668091	ANNZ01000343-1_1149	C	T	.	C/C	.	T/T	T/T	C/C	C/C	T/T	C/C	C/T	C/C	C/C	C/C	C/C	C/C	T/T	T/T	C/C	C/C	C/C	C/C	C/C	C/C	C/C	C/C	.	C/C	T/T	T/T	C/C	T/T	C/C	C/C	C/C	C/C	T/T	T/T	.	.	C/T	T/T	C/C	T/T	C/C	T/T
Pv01	8955315	ANNZ01000358-1_31391	G	A	.	.	.	.	.	G/G	G/G	G/A	G/G	G/G	G/G	G/G	G/G	G/G	.	.	.	.	.	G/G	G/G	G/G	G/G	G/G	G/G	.	.	.	.	G/G	.	G/G	G/G	G/G	G/G	.	.	.	.	.	.	G/G	.	G/G	.
Pv01	9399010	ANNZ01000378-1_95216	A	C	.	.	.	.	.	.	.	.	.	.	.	.	.	.	.	.	.	.	.	.	.	.	.	.	.	.	.	.	.	.	.	.	.	.	.	.	.	.	.	.	.	.	.	.	.
Pv01	9493874	ANNZ01000382-1_3193	T	C	.	C/C	C/C	T/T	T/T	T/T	T/T	T/T	T/T	T/T	T/T	T/T	T/T	T/T	C/C	T/T	T/T	C/C	C/C	T/T	T/T	T/T	T/T	T/T	T/T	C/C	C/C	T/T	T/T	T/T	T/T	T/T	T/T	T/T	T/T	T/T	T/T	C/C	C/C	C/C	T/T	T/T	T/T	T/T	T/T
Pv01	9583265	ANNZ01000383-1_88547	C	T	.	C/C	C/C	T/T	T/T	C/C	C/C	T/T	C/C	C/T	C/C	C/C	C/C	C/C	C/C	T/T	T/T	C/C	C/C	C/C	C/C	C/C	C/C	C/C	C/C	C/C	C/C	T/T	T/T	C/C	T/T	C/C	C/C	C/C	C/C	T/T	T/T	C/C	C/C	C/C	T/T	C/C	T/T	C/C	T/T
Pv01	9697846	ANNZ01000385-1_60342	C	A	.	C/C	.	A/A	A/A	C/C	C/C	A/A	C/C	C/A	C/C	C/C	C/C	C/C	A/A	A/A	A/A	A/A	A/A	C/C	C/C	C/C	C/C	C/C	C/C	.	C/C	A/A	A/A	C/C	A/A	C/C	C/C	C/C	C/C	A/A	A/A	.	.	C/C	A/A	C/C	A/A	C/C	A/A
Pv01	9706577	ANNZ01000385-1_69073	C	T	.	T/T	.	C/C	C/C	C/C	C/C	C/C	C/C	C/C	C/C	C/C	C/C	C/C	C/C	C/C	C/C	C/C	C/C	C/C	C/C	C/C	C/C	C/C	C/C	.	T/T	C/C	C/C	C/C	C/C	C/C	C/C	C/C	C/C	C/C	C/C	.	.	T/T	C/C	C/C	C/C	C/C	C/C
Pv01	9952427	ANNZ01000401-1_39766	T	C	.	T/T	.	T/T	C/C	T/T	T/T	C/C	T/T	T/T	T/T	T/T	T/T	T/T	C/C	T/T	C/C	C/C	C/C	T/T	T/T	T/T	T/T	T/T	T/T	.	T/T	T/C	T/T	T/T	C/C	T/T	T/T	T/T	T/T	C/C	C/C	.	.	.	T/T	T/T	C/C	T/T	C/C
Pv01	10555181	ANNZ01000432-1_9112	A	G	.	A/A	.	A/A	G/G	A/A	A/A	G/G	A/A	A/A	A/A	A/A	A/A	A/A	G/G	A/A	G/G	G/G	G/G	A/A	A/A	A/A	A/A	A/A	A/A	.	A/A	A/G	A/A	A/A	G/G	A/A	A/A	A/A	A/A	G/G	G/G	.	.	.	A/A	A/A	G/G	A/A	G/G
Pv01	15281332	ANNZ01001001-1_44638	G	A	.	G/G	.	G/G	A/A	G/G	G/G	A/A	G/G	G/G	G/G	G/G	G/G	G/G	A/A	G/G	A/A	A/A	A/A	G/G	G/G	G/G	G/G	G/G	G/G	.	G/G	G/A	G/G	G/G	A/A	G/G	G/G	G/G	G/G	A/A	A/A	.	.	G/G	G/G	G/G	A/A	G/G	A/A
Pv01	15667284	ANNZ01001016-1_4484	G	A	.	G/G	G/G	G/G	A/A	G/G	G/G	A/A	G/G	G/G	G/G	G/G	G/G	G/G	G/G	G/G	A/A	G/G	G/G	G/G	G/G	G/G	G/G	G/G	G/G	G/G	A/A	G/A	G/G	G/G	A/A	G/G	G/G	G/G	G/G	A/A	A/A	G/G	G/G	G/G	G/G	G/G	A/A	G/G	A/A
Pv01	27573176	ANNZ01002502-1_35593	C	A	.	C/C	.	C/C	A/A	C/C	C/C	A/A	C/C	C/C	C/C	C/C	C/C	C/C	C/C	C/C	A/A	C/C	C/C	C/C	C/C	C/C	C/C	C/C	C/C	.	C/C	C/A	C/C	C/C	C/C	C/C	C/C	C/C	C/C	C/C	A/A	.	.	.	C/C	C/C	C/C	C/C	A/A
Pv01	34064601	ANNZ01003124-1_56055	C	T	.	C/C	.	T/T	T/T	C/C	C/C	T/T	C/C	C/T	C/C	C/C	C/C	C/C	C/C	T/T	T/T	C/C	C/C	C/C	C/C	C/C	C/C	C/C	C/C	.	T/T	T/T	T/T	C/C	T/T	C/C	C/C	C/C	C/C	C/C	T/T	.	.	C/C	T/T	C/C	T/T	C/C	T/T
Pv01	36575220	ANNZ01003282-1_31990	G	A	.	G/G	.	G/G	A/A	G/G	G/G	A/A	G/G	G/G	G/G	G/G	G/G	G/G	G/G	G/G	A/A	G/G	G/G	G/G	G/G	G/G	G/G	G/G	G/G	.	G/G	G/A	G/G	G/G	A/A	G/G	G/G	G/G	G/G	G/G	A/A	.	.	.	G/G	G/G	A/A	G/G	A/A
Pv01	37652061	ANNZ01003333-1_22324	G	T	.	G/G	.	T/T	G/G	G/G	G/G	G/G	G/G	G/T	G/G	G/G	G/G	G/G	G/G	T/T	G/G	G/G	G/G	G/G	G/G	G/G	G/G	G/G	G/G	.	G/G	T/T	T/T	G/G	T/T	G/G	G/G	G/G	G/G	G/G	T/T	.	.	G/G	T/T	G/G	T/T	G/G	G/G
Pv01	38901612	ANNZ01003417-1_64881	G	A	.	.	.	.	.	.	.	.	.	.	.	.	.	.	.	.	.	.	.	.	.	.	.	.	.	.	.	.	.	.	.	.	.	.	.	.	.	.	.	.	.	.	.	.	.
Pv01	43150666	ANNZ01003645-1_37264	C	T	.	C/C	.	T/T	T/T	C/C	C/C	T/T	C/C	C/C	C/C	C/C	C/C	C/C	C/C	T/T	T/T	C/C	C/C	C/C	C/C	C/C	C/C	C/C	C/C	.	T/T	T/T	T/T	C/C	T/T	C/C	C/C	C/C	C/C	C/C	T/T	.	.	T/T	T/T	C/C	T/T	C/C	C/C
Pv01	43376888	ANNZ01003663-1_3619	A	G	.	A/A	G/G	G/G	A/A	A/A	A/A	A/A	A/A	A/G	A/A	A/A	A/A	A/A	A/A	G/G	A/A	A/A	G/G	A/A	A/A	A/A	A/A	A/A	A/A	G/G	A/A	G/G	G/G	A/A	G/G	A/A	A/A	A/A	A/A	A/A	A/A	G/G	G/G	G/G	G/G	A/A	G/G	A/A	A/A
Pv01	44502799	ANNZ01003704-1_87729	G	A	.	G/G	.	G/G	G/G	G/G	G/G	G/G	G/A	G/G	G/G	G/G	A/A	G/G	G/G	G/G	G/G	G/G	G/G	A/A	G/G	G/G	G/G	G/G	G/G	.	G/G	G/G	G/G	G/G	G/G	A/A	G/G	G/G	A/A	G/G	G/G	.	.	G/G	G/G	G/G	G/G	A/A	G/G
Pv01	44619835	ANNZ01003716-1_8817	A	C	.	A/A	A/A	C/C	C/C	A/A	A/A	C/C	A/A	A/C	A/A	A/A	A/A	A/A	C/C	C/C	C/C	A/A	A/A	A/A	A/A	A/A	A/A	A/A	A/A	A/A	C/C	C/C	C/C	A/A	C/C	A/A	A/A	A/A	A/A	A/A	C/C	A/A	A/A	C/C	C/C	A/A	C/C	A/A	A/A
Pv01	45286596	ANNZ01003742-1_12908	C	T	.	C/C	.	C/C	C/C	C/C	C/C	C/C	C/C	C/C	C/C	C/C	C/C	C/C	C/C	C/C	C/C	C/C	C/C	C/C	C/C	C/C	C/C	C/C	C/C	.	C/C	C/T	T/T	C/C	T/T	C/C	C/C	C/C	C/C	C/C	T/T	.	.	C/C	C/C	C/C	T/T	C/C	C/C
Pv01	45388383	ANNZ01003747-1_28859	T	C	.	T/T	T/T	T/T	T/T	T/T	T/T	T/T	T/T	T/T	T/T	T/T	T/T	T/T	T/T	T/T	T/T	T/T	T/T	T/T	T/T	T/T	T/T	T/T	T/T	T/T	T/T	T/T	T/T	T/T	C/C	T/T	T/T	T/T	T/T	T/T	T/T	T/T	T/T	T/T	T/T	T/T	C/C	T/T	T/T
Pv01	45681899	ANNZ01003759-1_28170	T	G	.	G/G	T/T	G/G	G/G	T/T	T/T	G/G	T/T	T/T	T/T	G/G	T/T	T/T	T/T	G/G	G/G	G/G	G/G	T/T	T/T	T/T	T/T	T/T	T/T	T/T	T/T	G/G	G/G	T/T	G/G	T/T	T/T	T/T	T/T	T/T	G/G	T/T	T/T	G/G	G/G	T/T	G/G	T/T	T/T
Pv01	45729420	ANNZ01003759-1_75691	T	G	.	G/G	G/G	G/G	G/G	T/T	T/T	G/G	T/T	T/T	T/T	G/G	T/T	T/T	T/T	G/G	G/G	G/G	G/G	T/T	T/T	T/T	T/T	T/T	T/T	G/G	T/T	G/G	G/G	T/T	G/G	T/T	T/T	T/T	T/T	T/T	G/G	G/G	G/G	G/G	G/G	T/T	G/G	T/T	T/T
Pv01	46081728	ANNZ01003772-1_1825	C	T	.	C/C	.	T/T	T/T	C/C	C/C	C/C	C/C	C/C	C/C	T/T	C/C	C/C	C/C	T/T	C/C	T/T	T/T	C/C	C/C	C/C	C/C	C/C	C/C	.	C/C	T/T	T/T	C/C	T/T	C/C	C/C	C/C	C/C	C/C	T/T	.	.	T/T	T/T	C/C	C/C	C/C	C/C
Pv01	46961514	ANNZ01003814-1_22133	T	C	.	T/T	T/T	C/C	C/C	T/T	T/T	T/T	T/T	T/T	T/T	T/T	T/T	T/T	T/T	C/C	T/T	T/T	T/T	T/T	T/T	T/T	T/T	T/T	T/T	T/T	T/T	T/T	T/T	T/T	T/T	T/T	T/T	T/T	T/T	T/T	T/T	T/T	T/T	C/C	C/C	T/T	T/T	T/T	T/T
Pv01	47490980	ANNZ01003833-1_35486	C	T	.	T/T	.	T/T	T/T	C/C	.	.	.	C/C	C/C	.	.	.	C/C	T/T	.	.	T/T	C/C	.	C/C	.	.	.	.	.	T/T	T/T	.	T/T	C/C	.	.	.	.	.	.	.	T/T	.	.	C/T	.	.
Pv01	48081949	ANNZ01003863-1_56200	T	C	.	C/C	C/C	C/C	C/C	T/T	T/T	C/C	T/C	T/C	T/T	T/T	T/T	T/T	C/C	C/C	C/C	C/C	C/C	T/T	T/C	T/T	T/T	T/T	T/T	C/C	C/C	C/C	C/C	T/T	C/C	T/T	T/T	T/T	T/T	C/C	C/C	C/C	C/C	C/C	C/C	T/T	C/C	T/T	T/T
Pv01	48138255	ANNZ01003864-1_13075	C	A	.	C/C	C/C	A/A	A/A	C/C	C/C	A/A	C/A	C/A	C/C	C/C	C/C	C/C	C/C	A/A	A/A	C/C	C/C	C/C	C/A	C/C	C/C	C/C	C/C	C/C	A/A	A/A	A/A	C/C	A/A	C/C	C/C	C/C	C/C	C/C	A/A	C/A	C/C	A/A	A/A	C/C	A/A	C/C	C/C
Pv01	48278463	ANNZ01003867-1_48744	T	C	.	C/C	T/T	C/C	C/C	T/T	T/T	C/C	T/C	T/C	T/T	T/T	T/T	T/T	C/C	C/C	C/C	C/C	C/C	T/T	T/C	T/T	T/T	T/T	T/T	T/T	C/C	C/C	C/C	T/T	C/C	T/T	T/T	T/T	T/T	T/T	C/C	T/T	T/T	C/C	C/C	T/T	C/C	T/T	T/T
Pv01	48340939	ANNZ01003868-1_13868	A	G	.	G/G	G/G	G/G	G/G	A/A	A/A	G/G	A/G	A/G	A/A	A/A	G/G	A/A	G/G	G/G	G/G	G/G	G/G	A/A	A/G	A/A	A/A	A/A	A/A	G/G	G/G	G/G	G/G	A/A	G/G	A/A	A/A	A/A	A/A	A/A	G/G	G/G	G/G	G/G	G/G	A/A	G/G	A/A	A/A
Pv01	48465224	ANNZ01003873-1_29803	G	A	.	A/A	G/G	A/A	A/A	G/G	G/G	A/A	G/A	G/G	G/G	G/G	G/G	G/G	G/G	A/A	A/A	G/G	G/G	G/G	G/A	G/G	G/G	G/G	G/G	G/G	A/A	A/A	A/A	G/G	A/A	G/G	G/G	G/G	G/G	G/G	A/A	G/G	G/G	A/A	A/A	G/G	A/A	G/G	G/G
Pv01	48581582	ANNZ01003875-1_60683	A	G	.	G/G	.	G/G	G/G	A/A	A/A	G/G	A/G	A/G	A/A	A/A	A/A	A/A	G/G	G/G	G/G	G/G	G/G	A/A	A/G	A/A	A/A	A/A	A/A	.	G/G	G/G	G/G	A/A	G/G	A/A	A/A	A/A	A/A	A/A	G/G	.	.	G/G	G/G	A/A	G/G	A/A	A/A
Pv01	48659602	ANNZ01003879-1_6995	C	T	.	T/T	.	T/T	T/T	C/C	C/C	T/T	C/T	C/T	C/C	C/C	C/C	C/C	T/T	T/T	T/T	T/T	T/T	C/C	C/T	C/C	C/C	C/C	C/C	.	T/T	T/T	T/T	C/C	T/T	C/C	C/C	C/C	C/C	C/C	T/T	.	.	T/T	T/T	C/C	T/T	C/C	C/C
Pv01	48797440	ANNZ01003893-1_9061	T	G	.	G/G	G/G	G/G	G/G	T/T	T/T	G/G	T/G	T/G	T/T	T/T	T/T	T/T	G/G	G/G	G/G	G/G	G/G	T/T	T/G	T/T	T/T	T/T	T/T	G/G	G/G	G/G	G/G	T/T	G/G	T/T	T/T	T/T	T/T	T/T	G/G	G/G	G/G	G/G	G/G	T/T	G/G	T/T	T/T
Pv01	48838736	ANNZ01003894-1_28687	C	T	.	T/T	.	T/T	T/T	C/C	C/C	T/T	C/T	C/T	C/C	C/C	C/C	C/C	T/T	T/T	T/T	T/T	T/T	C/C	C/T	C/C	C/C	C/C	C/C	C/C	T/T	T/T	T/T	C/C	T/T	C/C	C/C	C/C	C/C	C/C	T/T	C/T	C/C	T/T	T/T	C/C	T/T	C/C	C/C
Pv01	48894895	ANNZ01003894-1_84786	A	C	.	A/A	.	A/A	A/A	C/C	C/C	A/A	A/C	A/C	C/C	C/C	C/C	C/C	A/A	A/A	A/A	A/A	A/A	C/C	A/C	C/C	C/C	C/C	C/C	.	A/A	A/A	A/A	C/C	A/A	C/C	C/C	C/C	C/C	C/C	A/A	.	.	A/A	A/A	C/C	A/A	C/C	C/C
Pv01	48993626	ANNZ01003896-1_34152	A	G	.	G/G	.	G/G	G/G	A/A	A/A	G/G	A/G	A/G	A/A	A/A	A/A	A/A	G/G	G/G	G/G	G/G	G/G	A/A	A/A	A/A	A/A	A/A	A/A	.	G/G	G/G	G/G	A/A	G/G	A/A	A/A	A/A	A/A	A/A	G/G	.	.	G/G	G/G	A/A	G/G	A/A	A/A
Pv01	49094736	ANNZ01003898-1_32313	G	A	.	G/G	.	A/A	G/G	G/G	G/G	A/A	G/A	G/A	G/G	G/G	G/G	G/G	A/A	A/A	A/A	G/G	G/G	G/G	G/G	G/G	G/G	G/G	G/G	.	A/A	A/A	A/A	G/G	A/A	G/G	G/G	G/G	G/G	G/G	A/A	.	.	A/A	A/A	G/G	A/A	G/G	G/G
Pv01	49112828	ANNZ01003899-1_4231	G	T	.	G/G	.	T/T	G/G	G/G	G/G	T/T	G/T	G/T	G/G	G/G	G/G	G/G	T/T	T/T	T/T	G/G	G/G	G/G	G/G	G/G	G/G	G/G	G/G	.	T/T	T/T	T/T	G/G	T/T	G/G	G/G	G/G	G/G	G/G	T/T	.	.	T/T	T/T	G/G	T/T	G/G	G/G
Pv01	49276924	ANNZ01003902-1_12961	T	G	.	G/G	G/G	G/G	G/G	T/T	T/T	G/G	T/G	T/G	T/T	T/T	T/T	T/T	G/G	G/G	G/G	G/G	G/G	T/T	T/T	T/T	T/T	T/T	T/T	G/G	G/G	G/G	G/G	T/T	G/G	T/T	T/T	T/T	T/T	T/T	G/G	G/G	G/G	G/G	G/G	T/T	G/G	T/T	T/T
Pv01	49385601	ANNZ01003905-1_9478	G	A	.	G/G	G/G	A/A	G/G	G/G	G/G	A/A	G/G	G/A	G/G	G/G	G/G	G/G	G/G	A/A	A/A	G/G	G/G	G/G	G/G	G/G	G/G	G/G	G/G	G/G	G/G	G/G	G/G	G/G	A/A	G/G	G/G	G/G	G/G	G/G	G/G	G/G	G/G	A/A	G/G	G/G	A/A	G/G	G/G
Pv01	49694707	ANNZ01003915-1_41302	C	T	.	T/T	.	T/T	T/T	C/C	C/C	T/T	C/T	C/T	C/C	C/C	C/C	C/C	T/T	T/T	T/T	T/T	T/T	C/C	C/C	C/C	C/C	C/C	C/C	.	T/T	T/T	T/T	C/C	T/T	C/C	C/C	C/C	C/C	C/C	T/T	.	.	T/T	T/T	T/T	T/T	C/C	C/C
Pv01	49776937	ANNZ01003926-1_8372	T	G	.	T/T	T/T	T/T	T/T	T/T	T/T	G/G	T/T	T/T	T/T	T/T	T/T	T/T	T/T	T/T	G/G	T/T	T/T	T/T	T/T	T/T	T/T	T/T	T/T	T/T	T/T	T/T	T/T	T/T	T/T	T/T	T/T	T/T	T/T	T/T	T/T	T/T	T/T	T/T	G/G	T/T	T/T	T/T	.
Pv01	49895922	ANNZ01003931-1_77827	G	A	.	G/G	G/G	G/G	G/G	G/G	G/G	A/A	G/G	G/G	G/G	G/G	G/G	G/G	G/G	G/G	A/A	A/A	G/G	G/G	G/G	G/G	G/G	G/G	G/G	G/G	G/G	A/A	A/A	G/G	G/G	G/G	G/G	G/G	G/G	G/G	A/A	G/G	G/G	G/G	A/A	G/G	G/G	G/G	G/G
Pv01	49940181	ANNZ01003932-1_22430	A	C	.	A/A	.	.	.	A/A	A/A	.	A/A	A/A	A/A	A/A	A/A	A/A	.	.	.	.	.	A/A	A/A	A/A	A/A	A/A	A/A	.	.	.	A/A	A/A	.	A/A	A/A	A/A	A/A	A/A	.	.	.	.	.	.	.	A/A	A/A
Pv01	50099878	ANNZ01003936-1_4329	T	C	.	C/C	.	T/T	C/C	T/T	T/T	T/T	T/C	T/C	T/T	T/T	T/T	T/T	C/C	T/T	T/T	C/C	C/C	T/T	T/T	T/T	T/T	T/T	T/T	.	T/T	C/C	C/C	T/T	C/C	T/T	T/T	T/T	T/T	T/T	C/C	.	.	T/T	T/T	C/C	C/C	T/T	T/T
Pv01	50190225	ANNZ01003936-1_94676	C	G;T	.	T/T	G/G	T/T	T/T	C/C	C/C	T/T	C/T	C/T	C/C	C/C	C/C	C/C	T/T	T/T	T/T	T/T	T/T	C/C	C/C	C/C	C/C	C/C	C/C	G/G	T/T	T/T	T/T	C/C	T/T	C/C	C/C	C/C	C/C	C/C	T/T	G/G	G/G	T/T	T/T	T/T	T/T	C/C	C/C
Pv01	50222644	ANNZ01003937-1_17848	C	A	.	A/A	.	A/A	A/A	C/C	C/C	A/A	C/A	C/A	C/C	C/C	C/C	C/C	A/A	A/A	A/A	A/A	A/A	C/C	C/C	C/C	C/C	C/C	C/C	C/A	A/A	A/A	A/A	C/C	A/A	C/C	C/C	C/C	C/C	C/C	A/A	.	.	A/A	A/A	A/A	A/A	C/C	C/C
Pv01	50301592	ANNZ01003939-1_62015	T	C	.	T/T	C/C	T/T	T/T	T/T	C/C	T/T	T/C	T/C	C/C	C/C	C/C	C/C	T/T	T/T	T/T	T/T	T/T	C/C	C/C	C/C	C/C	C/C	T/T	C/C	T/T	T/T	T/T	T/T	T/T	T/T	C/C	C/C	C/C	T/T	T/T	C/C	C/C	T/T	T/T	C/C	T/T	C/C	C/C
Pv01	51289581	ANNZ01003954-1_112344	G	T	.	T/T	G/G	T/T	G/G	G/G	G/G	G/G	G/G	G/T	G/G	G/G	G/G	G/G	T/T	T/T	G/G	T/T	T/T	G/G	G/G	G/G	G/G	G/G	G/G	G/G	T/T	T/T	T/T	G/G	T/T	G/G	G/G	G/G	G/G	T/T	T/T	G/G	G/G	T/T	T/T	G/G	T/T	G/G	G/G
Pv01	51557213	ANNZ01003955-1_215378	C	T	.	C/C	.	C/C	C/C	T/T	C/C	C/C	C/T	C/C	C/C	T/T	C/C	T/T	C/C	C/C	C/C	C/C	C/C	C/C	C/C	T/T	C/C	T/T	C/C	.	C/C	C/C	C/C	C/C	C/C	C/C	C/C	C/C	T/T	C/C	C/C	.	.	C/C	C/C	C/C	C/C	C/C	C/C
Pv01	51617802	ANNZ01003957-1_3213	C	T	.	C/C	.	.	.	C/C	T/T	C/C	C/T	C/T	T/T	C/C	T/T	C/C	.	C/C	.	.	.	C/C	T/T	C/C	C/T	C/C	T/T	.	C/C	C/C	C/C	T/T	C/C	C/C	T/T	C/C	C/C	C/C	.	.	.	.	C/C	T/T	.	T/T	T/T
Pv01	51653736	ANNZ01003958-1_11099	A	G	.	G/G	.	G/G	G/G	A/A	G/G	G/G	A/A	G/G	A/A	A/A	G/G	A/A	G/G	G/G	G/G	G/G	G/G	A/A	G/G	A/A	A/G	A/A	G/G	.	G/G	G/G	G/G	A/A	G/G	A/A	G/G	A/A	A/A	G/G	G/G	.	.	G/G	G/G	G/G	G/G	G/G	G/G
Pv01	51787008	ANNZ01003958-1_144371	A	C	.	C/C	C/C	A/A	A/A	A/A	A/A	A/A	A/A	A/A	A/A	A/A	A/A	A/A	C/C	A/A	A/A	C/C	A/C	A/A	A/A	A/A	A/A	A/A	A/A	C/C	A/A	A/A	A/A	A/A	A/A	A/A	A/A	A/A	A/A	C/C	A/A	C/C	C/C	A/A	A/A	A/A	A/A	A/A	A/A
Pv01	51883772	ANNZ01003960-1_6273	G	A	.	A/A	G/G	G/G	G/G	G/G	G/G	G/G	G/G	G/A	G/G	G/G	G/G	G/G	G/G	G/G	G/G	A/A	A/A	G/G	G/G	G/G	G/G	G/G	G/G	G/G	G/G	G/G	A/A	G/G	G/G	G/G	G/G	G/G	G/G	G/G	G/G	G/G	G/G	G/G	G/G	G/G	G/G	G/G	G/G
Pv01	52039723	ANNZ01003961-1_30542	A	G	.	A/A	G/G	G/G	G/G	A/A	A/A	G/G	A/A	A/A	A/A	A/A	A/A	A/A	A/A	G/G	G/G	A/A	A/A	A/A	A/A	G/G	G/G	A/A	A/A	G/G	G/G	G/G	A/A	A/A	G/G	A/A	A/A	A/A	A/A	A/A	G/G	G/G	G/G	G/G	G/G	A/A	G/G	A/A	A/A
Pv01	52183544	ANNZ01003967-1_39746	T	C	.	C/C	.	T/T	T/T	T/T	T/T	T/T	C/C	T/C	T/T	T/T	T/T	C/C	C/C	T/T	T/T	C/C	C/C	T/T	T/T	C/C	C/C	T/T	T/T	.	T/T	T/T	C/C	T/T	T/T	T/T	T/T	C/C	C/C	C/C	T/T	T/C	.	T/T	T/T	T/T	T/T	T/T	T/T
Pv02	6803	ANNZ01003972-1_5602	C	T	.	C/C	.	T/T	T/T	C/C	C/C	T/T	C/C	C/T	T/T	T/T	C/C	C/C	T/T	T/T	T/T	T/T	T/T	T/T	C/C	T/T	C/C	C/C	C/C	.	T/T	T/T	T/T	C/C	T/T	C/C	C/C	.	C/C	T/T	T/T	.	.	T/T	T/T	T/T	T/T	C/C	C/C
Pv02	195928	ANNZ01003984-1_2468	G	A	.	A/A	A/A	A/A	G/G	G/G	G/G	G/G	G/G	G/G	G/G	G/G	G/G	G/G	G/G	A/A	G/G	G/G	G/G	G/G	G/G	G/G	G/G	G/G	G/G	A/A	G/G	G/G	A/A	G/G	G/G	G/G	G/G	G/G	G/G	G/G	G/G	A/A	A/A	A/A	A/A	G/G	G/G	G/G	G/G
Pv02	328388	ANNZ01003987-1_13660	G	A	.	G/G	.	G/G	G/G	G/G	G/G	G/G	A/A	G/A	G/G	G/G	G/G	A/A	G/G	G/G	G/G	G/G	G/G	G/G	G/A	G/G	A/A	G/G	A/A	.	G/G	G/G	G/G	G/G	G/G	A/A	A/A	G/G	A/A	G/G	G/G	.	.	G/G	G/G	G/G	G/G	G/G	G/G
Pv02	585012	ANNZ01003992-1_125402	G	T	.	G/G	G/G	G/G	G/G	G/G	G/G	G/G	G/T	G/G	G/G	G/G	G/G	G/G	G/G	G/G	G/G	G/G	G/G	G/G	G/T	G/G	G/G	G/G	T/T	G/G	G/G	G/G	G/G	G/G	G/G	G/G	T/T	G/G	T/T	G/G	G/G	G/G	G/G	G/G	G/G	G/G	G/G	G/G	G/G
Pv02	623253	ANNZ01003993-1_22940	A	G	.	G/G	A/A	G/G	A/A	A/A	G/G	A/A	G/G	A/G	A/A	G/G	A/A	G/G	A/A	G/G	A/A	G/G	G/G	A/A	G/G	A/A	G/G	G/G	G/G	A/A	A/A	G/G	G/G	G/G	A/A	A/A	G/G	A/A	G/G	A/A	A/A	A/A	A/A	A/G	G/G	G/G	A/A	A/A	A/A
Pv02	1026678	ANNZ01004010-1_3420	C	T	.	C/C	C/T	C/C	T/T	C/C	C/C	C/C	C/C	C/T	C/C	C/C	C/C	C/C	C/C	C/C	C/C	T/T	T/T	C/C	C/C	C/C	C/C	C/C	C/C	C/T	C/C	C/C	C/C	C/C	T/T	C/C	C/C	C/C	C/C	C/C	C/C	.	C/T	T/T	C/C	C/C	T/T	C/C	C/C
Pv02	1362753	ANNZ01004017-1_38366	G	A;C	.	G/G	C/C	G/G	G/G	G/G	G/G	G/G	G/G	G/G	G/G	G/G	G/G	G/G	A/A	G/G	A/A	G/G	G/G	G/G	G/G	G/G	G/G	G/G	G/G	C/C	G/G	G/G	G/G	G/G	G/G	G/G	G/G	G/G	G/G	G/G	G/G	C/C	C/C	G/G	G/G	G/G	G/G	G/G	G/G
Pv02	1493449	ANNZ01004021-1_83167	G	A	.	G/G	G/G	G/G	G/G	G/G	G/G	G/G	G/G	G/G	G/G	G/G	G/G	G/G	G/G	G/G	A/A	G/G	G/G	G/G	G/G	G/G	G/G	G/G	G/G	G/G	G/G	G/G	A/A	G/G	G/G	G/G	G/G	G/G	G/G	G/G	G/G	G/G	G/G	G/G	A/A	G/G	G/G	G/G	G/G
Pv02	1695436	ANNZ01004031-1_17029	C	A	.	A/A	.	A/A	A/A	C/C	C/C	A/A	C/A	A/A	C/C	C/C	C/C	C/C	A/A	A/A	C/C	C/C	A/A	A/A	C/C	C/C	C/C	C/C	C/C	.	A/A	A/A	A/A	C/C	A/A	A/A	C/C	C/C	C/C	A/A	A/A	.	.	C/C	A/A	C/C	A/A	C/A	A/A
Pv02	1756563	ANNZ01004035-1_39317	T	C	.	.	.	.	T/T	T/T	T/T	.	T/T	.	T/T	T/T	T/T	T/T	T/T	T/T	T/C	.	.	.	T/T	T/T	T/T	T/T	T/T	T/T	.	.	.	T/T	.	T/T	T/T	T/T	T/T	.	.	.	.	.	.	T/T	.	.	.
Pv02	2191154	ANNZ01004046-1_29851	G	A	.	A/A	G/G	A/A	A/A	G/G	G/G	A/A	G/A	G/A	G/G	G/G	G/G	G/G	A/A	A/A	A/A	G/G	A/A	G/G	G/G	G/G	G/G	G/G	G/G	G/G	A/A	A/A	A/A	G/G	A/A	A/A	G/G	A/A	G/G	G/G	A/A	G/G	G/G	G/G	A/A	G/G	A/A	G/G	A/A
Pv02	2270492	ANNZ01004049-1_9783	C	T	.	T/T	C/C	T/T	T/T	C/C	C/C	T/T	C/T	C/T	C/C	C/C	C/C	C/C	T/T	T/T	T/T	C/C	T/T	C/C	C/C	C/C	C/C	C/C	C/C	C/C	T/T	T/T	T/T	C/C	T/T	T/T	C/C	C/C	C/C	C/C	.	C/C	C/C	T/T	T/T	C/C	T/T	T/T	T/T
Pv02	2371634	ANNZ01004053-1_19616	A	G	.	G/G	A/A	G/G	A/A	A/A	A/A	A/A	G/G	G/G	G/G	A/A	A/A	A/A	A/A	G/G	A/A	G/G	G/G	A/A	A/A	A/A	A/A	G/G	A/A	A/A	G/G	G/G	G/G	A/A	G/G	G/G	A/A	G/G	A/A	G/G	G/G	A/A	A/A	A/A	G/G	A/A	G/G	A/A	G/G
Pv02	2485276	ANNZ01004056-1_12015	A	G	.	G/G	A/A	A/A	A/A	A/A	A/A	A/A	G/G	A/G	G/G	A/A	A/A	A/A	A/A	A/A	A/A	G/G	G/G	A/A	A/A	A/A	A/A	G/G	A/A	A/A	G/G	A/A	A/A	A/A	G/G	G/G	A/A	G/G	A/A	G/G	G/G	A/A	A/A	A/A	A/A	A/A	G/G	A/A	G/G
Pv02	2520432	ANNZ01004056-1_47171	T	C	.	T/T	T/T	C/C	C/C	T/T	T/T	C/C	T/T	T/C	T/T	T/T	T/T	T/T	C/C	C/C	C/C	T/T	T/T	T/T	T/T	T/T	T/T	T/T	T/T	T/T	T/T	C/C	C/C	T/T	T/T	T/T	T/T	T/T	T/T	T/T	T/T	T/T	T/T	C/C	C/C	T/T	T/T	C/C	T/T
Pv02	2794986	ANNZ01004065-1_13463	A	G	.	A/A	.	G/G	A/A	A/A	A/A	G/G	A/G	A/A	A/A	A/A	A/A	A/A	A/A	G/G	G/G	G/G	G/G	A/A	A/A	A/A	A/A	A/A	A/A	.	A/A	G/G	G/G	A/A	A/A	A/A	A/A	G/G	A/A	G/G	A/A	.	.	G/G	G/G	A/A	A/A	A/A	G/G
Pv02	2802946	ANNZ01004065-1_21483	A	G	.	A/A	A/A	A/A	A/A	A/A	A/A	A/A	A/G	A/A	A/A	A/A	A/A	A/A	G/G	A/A	A/A	A/A	A/A	A/A	A/A	A/A	A/A	A/A	A/A	A/A	G/G	A/A	A/A	A/A	G/G	G/G	A/A	A/A	A/A	A/A	G/G	A/A	A/A	A/A	A/A	G/G	G/G	G/G	A/A
Pv02	3110547	ANNZ01004076-1_4989	C	T	.	C/C	C/C	C/C	C/C	C/C	C/C	C/C	C/T	C/C	C/C	C/C	C/C	C/C	C/C	C/C	C/C	T/T	T/T	C/C	C/C	C/C	C/C	C/C	C/C	C/C	C/C	C/C	C/C	C/C	C/C	T/T	C/C	C/C	C/C	T/T	T/T	C/C	C/C	C/C	C/C	C/C	C/C	C/C	T/T
Pv02	3296131	ANNZ01004081-1_64700	G	A	.	A/A	G/G	G/G	G/G	G/G	G/G	G/G	G/A	G/G	G/G	G/G	G/G	G/G	A/A	G/G	G/G	A/A	A/A	G/G	G/G	G/G	G/G	G/G	G/G	G/G	G/G	G/G	G/G	G/G	G/G	A/A	G/G	G/G	G/G	G/G	G/G	G/G	G/G	G/G	G/G	A/A	G/G	G/G	A/A
Pv02	3395129	ANNZ01004089-1_38001	T	C	.	C/C	.	C/C	C/C	T/T	T/T	C/C	T/C	T/T	T/T	T/T	C/C	T/T	C/C	C/C	C/C	C/C	C/C	C/C	T/T	C/C	T/T	T/T	T/T	.	C/C	C/C	C/C	T/T	C/C	C/C	T/T	T/T	T/T	T/T	C/C	.	.	C/C	C/C	C/C	C/C	C/C	C/C
Pv02	3499921	ANNZ01004089-1_142793	A	.	.	.	.	.	.	.	.	.	.	.	.	.	.	.	.	.	.	.	.	.	.	.	.	.	.	.	.	.	.	.	.	.	.	.	.	.	.	.	.	.	.	.	.	.	.
Pv02	3598722	ANNZ01004092-1_9756	A	G	.	G/G	A/A	G/G	G/G	A/A	A/A	G/G	A/G	A/A	A/A	A/A	G/G	A/A	G/G	G/G	G/G	G/G	G/G	A/A	A/A	A/A	A/A	A/A	A/A	A/A	G/G	G/G	G/G	A/A	G/G	G/G	A/A	A/A	A/A	A/A	G/G	A/A	A/A	G/G	G/G	G/G	G/G	A/A	G/G
Pv02	3633844	ANNZ01004092-1_44878	T	G	.	G/G	G/G	G/G	G/G	T/T	T/T	G/G	T/G	T/T	T/T	T/T	G/G	T/T	G/G	G/G	G/G	G/G	G/G	T/T	T/T	T/T	T/T	T/T	T/T	G/G	G/G	G/G	G/G	T/T	G/G	G/G	T/T	G/G	T/T	T/T	G/G	G/G	G/G	G/G	G/G	G/G	G/G	T/T	G/G
Pv02	3915879	ANNZ01004099-1_56840	G	T	.	G/G	T/T	G/G	G/G	G/G	G/G	G/G	G/G	G/G	G/G	G/G	T/T	G/G	G/G	G/G	T/T	G/G	G/G	G/G	G/G	G/G	G/G	G/G	G/G	T/T	G/G	G/G	G/G	G/G	G/G	G/G	G/G	G/G	G/G	G/G	G/G	T/T	T/T	G/G	G/G	G/G	G/G	G/G	T/T
Pv02	4280298	ANNZ01004111-1_44693	C	A	.	C/C	C/C	C/C	C/C	C/C	C/C	C/C	C/C	C/C	C/C	C/C	C/C	C/C	C/C	C/C	C/C	A/A	A/A	C/C	C/C	C/C	C/C	C/C	C/C	C/C	C/C	C/C	C/C	C/C	C/C	A/A	C/C	C/C	C/C	C/C	C/C	C/C	C/C	C/C	C/C	A/A	C/C	C/C	C/C
Pv02	4334434	ANNZ01004111-1_98829	G	A	.	G/G	G/G	A/A	A/A	G/G	G/G	A/A	G/G	G/A	G/G	G/G	A/A	G/G	A/A	A/A	A/A	G/G	G/G	G/G	G/G	G/G	G/G	G/G	G/G	G/G	A/A	A/A	A/A	G/G	A/A	G/G	G/G	G/G	G/G	G/G	A/A	G/G	G/G	A/A	A/A	G/G	A/A	G/G	G/G
Pv02	4551101	ANNZ01004129-1_16018	G	T	.	T/T	G/G	T/T	T/T	G/G	G/G	T/T	G/T	G/T	G/G	G/G	T/T	G/G	T/T	T/T	T/T	T/T	T/T	G/G	G/G	G/G	G/G	G/G	G/G	G/G	T/T	T/T	T/T	G/G	G/G	G/G	G/G	G/G	G/G	G/G	T/T	G/G	G/G	T/T	T/T	G/G	G/G	G/G	G/G
Pv02	4635274	ANNZ01004129-1_100191	G	T	.	T/T	.	G/G	G/G	G/G	G/G	G/G	G/T	G/G	G/G	G/G	G/G	G/G	G/G	G/G	G/G	T/T	T/T	G/G	G/G	G/G	G/G	G/G	G/G	T/T	G/G	G/G	G/G	G/G	G/G	T/T	G/G	T/T	G/G	G/G	G/G	T/T	G/T	G/G	G/G	G/G	G/G	G/G	G/G
Pv02	4732292	ANNZ01004133-1_31302	C	A	.	A/A	C/C	A/A	A/A	C/C	C/C	A/A	C/A	C/A	C/C	C/C	C/C	C/C	A/A	A/A	A/A	A/A	A/A	C/C	C/C	C/C	C/C	C/C	A/A	C/C	A/A	A/A	A/A	C/C	A/A	C/C	C/C	C/C	C/C	C/C	A/A	C/C	C/C	A/A	A/A	C/C	A/A	C/C	C/C
Pv02	4809907	ANNZ01004135-1_21470	G	T	.	G/G	.	G/G	G/G	G/G	G/G	G/G	G/G	G/G	G/G	G/G	G/G	G/G	G/G	G/G	G/G	G/G	G/G	G/G	G/G	G/G	G/G	G/G	G/G	G/G	G/G	G/G	G/G	G/G	G/G	T/T	G/G	G/G	G/G	G/G	G/G	.	.	G/G	G/G	G/G	G/G	G/G	G/G
Pv02	4993649	ANNZ01004143-1_61759	T	G	.	G/G	T/T	G/G	G/G	T/T	T/T	G/G	T/G	T/G	T/T	T/T	T/T	T/T	G/G	G/G	G/G	G/G	G/G	T/T	T/T	T/T	T/T	T/T	G/G	T/T	G/G	G/G	G/G	T/T	G/G	T/T	T/T	T/T	T/T	T/T	G/G	T/T	T/T	G/G	G/G	T/T	G/G	T/T	G/G
Pv02	5034223	ANNZ01004143-1_102333	A	G	.	A/A	.	A/A	A/A	A/A	A/A	A/A	A/A	A/A	A/A	A/A	A/A	A/A	A/A	A/A	A/A	A/A	A/A	A/A	A/A	A/A	A/A	A/A	A/A	.	A/A	A/A	A/A	A/A	A/A	G/G	A/A	G/G	A/A	A/A	A/A	.	.	A/A	A/A	A/A	A/A	A/A	A/A
Pv02	5755570	ANNZ01004269-1_50635	C	T	.	C/C	C/C	C/C	C/C	C/C	C/C	C/C	C/C	C/C	C/C	C/C	C/C	C/C	C/C	C/C	T/T	C/C	C/C	C/C	C/C	C/C	C/C	C/C	C/C	C/C	C/C	C/C	C/C	C/C	C/C	C/C	C/C	C/C	C/C	C/C	C/C	C/C	C/C	C/C	C/C	C/C	C/C	C/C	C/C
Pv02	5899123	ANNZ01004285-1_22175	G	A	.	G/G	.	G/G	G/G	G/G	G/G	G/G	G/G	G/G	G/G	G/G	G/G	G/G	G/G	G/G	G/G	G/G	G/G	G/G	G/G	G/G	G/G	G/G	G/G	.	G/G	G/G	G/G	G/G	G/G	A/A	G/G	A/A	G/G	G/G	G/G	.	.	G/G	G/G	G/G	G/G	G/G	G/G
Pv02	6067022	ANNZ01004311-1_53388	T	C	.	T/T	.	T/T	T/T	T/T	T/T	T/T	T/T	T/T	T/T	T/T	T/T	T/T	T/T	T/T	T/T	T/T	T/T	T/T	T/T	T/T	T/T	T/T	T/T	.	T/T	T/T	T/T	T/T	T/T	C/C	T/T	C/C	T/T	T/T	T/T	.	.	T/T	T/T	T/T	T/T	T/T	T/T
Pv02	6466739	ANNZ01004363-1_71364	G	T	.	T/T	.	T/T	T/T	G/G	G/G	T/T	G/T	G/T	G/G	G/G	G/G	G/G	T/T	T/T	T/T	T/T	T/T	G/G	G/G	G/G	G/G	G/G	T/T	.	T/T	T/T	T/T	G/G	T/T	G/G	G/G	G/G	G/G	G/G	T/T	.	.	T/T	T/T	G/G	T/T	G/G	T/T
Pv02	6578570	ANNZ01004370-1_17689	G	A	.	G/G	.	G/G	G/G	G/G	G/G	G/G	G/G	G/G	G/G	G/G	G/G	G/G	.	G/G	G/G	G/G	G/G	G/G	G/G	G/G	G/G	G/G	G/G	.	G/G	G/G	G/G	G/G	G/G	A/A	G/G	A/A	G/G	G/G	G/G	.	.	G/G	G/G	G/G	G/G	.	G/G
Pv02	6664328	ANNZ01004380-1_5622	A	C	.	A/A	.	A/A	A/A	A/A	A/A	A/A	A/C	A/A	A/A	A/A	A/A	A/A	A/A	A/A	C/C	C/C	C/C	A/A	A/A	A/A	A/A	A/A	A/A	A/A	C/C	A/A	A/A	A/A	A/A	A/A	A/A	A/A	A/A	A/A	A/A	.	.	A/A	A/A	A/A	A/A	A/A	A/A
Pv02	6873190	ANNZ01004392-1_4206	T	C	.	T/T	.	T/T	T/T	T/T	T/T	T/T	T/T	T/T	T/T	T/T	T/T	T/T	T/T	T/T	T/T	T/T	T/T	T/T	T/T	T/T	T/T	T/T	T/T	.	T/T	T/T	T/T	T/T	T/T	C/C	T/T	C/C	T/T	T/T	T/T	.	.	T/T	T/T	T/T	T/T	T/T	T/T
Pv02	7023056	ANNZ01004398-1_12662	T	G	.	T/T	.	T/T	T/T	T/T	T/T	T/T	T/T	T/T	T/T	T/T	T/T	T/T	T/T	T/T	T/T	T/T	T/T	T/T	T/T	T/T	T/T	T/T	T/T	.	T/T	T/T	T/T	T/T	T/T	G/G	T/T	G/G	T/T	T/T	T/T	.	.	T/T	T/T	T/T	T/T	T/T	T/T
Pv02	7150219	ANNZ01004406-1_7652	G	A	.	G/G	.	G/G	G/G	G/G	G/G	A/A	G/G	G/G	G/G	G/G	G/G	G/G	G/G	G/G	A/A	G/G	G/G	G/G	G/G	G/G	G/G	G/G	G/G	.	G/G	G/G	G/G	G/G	G/G	G/G	G/G	G/G	G/G	G/G	G/G	.	.	G/G	G/G	G/G	G/G	G/G	G/G
Pv02	7391329	ANNZ01004422-1_8426	A	G	.	A/A	G/G	A/A	A/A	A/A	A/A	G/G	A/A	A/A	A/A	A/A	A/A	A/A	A/A	A/A	G/G	A/A	A/A	A/A	A/A	A/A	A/A	A/A	A/A	G/G	A/A	A/A	A/A	A/A	A/A	A/A	A/A	A/A	A/A	A/A	A/A	G/G	G/G	A/A	A/A	A/A	A/A	A/A	A/A
Pv02	7590982	ANNZ01004445-1_7236	A	.	.	A/A	.	A/A	A/A	A/A	A/A	A/A	A/A	A/A	A/A	A/A	A/A	A/A	A/A	A/A	A/A	A/A	A/A	A/A	A/A	A/A	A/A	A/A	A/A	.	A/A	A/A	A/A	A/A	A/A	A/A	A/A	A/A	A/A	A/A	A/A	.	.	A/A	A/A	A/A	A/A	A/A	A/A
Pv02	7834480	ANNZ01004460-1_29415	T	C	.	C/C	.	T/T	T/T	T/T	T/T	T/T	T/C	T/T	T/T	T/T	T/T	T/T	T/T	T/T	T/T	C/C	C/C	T/T	T/T	T/T	T/T	T/T	T/T	.	T/T	T/T	T/T	T/T	T/T	C/C	T/T	C/C	T/T	T/T	T/T	.	.	T/T	T/T	T/T	T/T	T/T	T/T
Pv02	8345140	ANNZ01004489-1_35995	T	C	.	C/C	C/C	C/C	C/C	T/T	C/C	C/C	T/C	T/C	C/C	C/C	C/C	T/T	C/C	C/C	C/C	C/C	C/C	T/T	C/C	T/T	T/T	C/C	C/C	C/C	C/C	C/C	C/C	C/C	C/C	C/C	C/C	C/C	T/T	T/T	C/C	C/C	C/C	C/C	C/C	C/C	C/C	T/T	C/C
Pv02	8734620	ANNZ01004534-1_12647	G	.	.	G/G	.	G/G	G/G	G/G	G/G	G/G	G/G	G/G	G/G	G/G	G/G	G/G	G/G	G/G	G/G	G/G	G/G	G/G	G/G	G/G	G/G	G/G	G/G	.	G/G	G/G	G/G	G/G	G/G	G/G	G/G	G/G	G/G	G/G	G/G	.	.	G/G	G/G	G/G	G/G	G/G	G/G
Pv02	8879246	ANNZ01004559-1_55436	G	A	.	G/G	.	A/A	A/A	G/G	G/G	G/G	G/G	G/A	G/G	G/G	G/G	G/G	A/A	A/A	A/A	G/G	G/G	G/G	G/G	G/G	G/G	G/G	G/G	.	A/A	A/A	A/A	G/G	G/G	G/G	G/G	G/G	G/G	G/G	G/G	.	.	A/A	A/A	G/G	G/G	G/G	G/G
Pv02	8977185	ANNZ01004560-1_3626	T	C	.	T/T	.	C/C	C/C	T/T	T/T	T/T	T/T	T/C	T/T	T/T	T/T	T/T	C/C	C/C	C/C	T/T	T/T	T/T	T/T	T/T	T/T	T/T	T/T	.	C/C	C/C	C/C	T/T	T/T	T/T	T/T	T/T	T/T	T/T	T/T	.	.	C/C	C/C	T/T	T/T	T/T	T/T
Pv02	9076286	ANNZ01004567-1_2629	G	A	.	G/G	.	A/A	A/A	G/G	G/G	G/G	G/G	G/A	G/G	G/G	G/G	G/G	A/A	A/A	A/A	G/G	G/G	G/G	G/G	G/G	G/G	G/G	G/G	.	A/A	A/A	A/A	G/G	G/G	G/G	G/G	G/G	G/G	G/G	G/G	.	.	A/A	A/A	G/G	G/G	G/G	G/G
Pv02	9161335	ANNZ01004569-1_16204	T	C	.	T/T	.	C/C	C/C	T/T	T/T	T/T	T/T	T/C	T/T	T/T	T/T	T/T	C/C	C/C	C/C	T/T	T/T	T/T	T/T	T/T	T/T	T/T	T/T	.	C/C	C/C	C/C	T/T	T/T	T/T	T/T	T/T	T/T	T/T	T/T	.	.	C/C	C/C	T/T	T/T	T/T	T/T
Pv02	9610369	ANNZ01004632-1_25908	A	G	.	G/G	.	G/G	G/G	G/G	G/G	G/G	A/G	G/G	G/G	G/G	G/G	A/A	G/G	G/G	G/G	G/G	G/G	A/A	G/G	A/A	A/A	G/G	G/G	.	G/G	G/G	G/G	G/G	G/G	G/G	G/G	G/G	A/A	A/A	G/G	.	.	G/G	G/G	G/G	G/G	G/G	G/G
Pv02	9709848	ANNZ01004637-1_71266	C	T	.	T/T	.	C/C	C/C	C/C	C/C	T/T	C/C	C/C	C/C	C/C	C/C	C/C	C/C	C/C	C/C	T/T	T/T	C/C	C/C	C/C	C/C	C/C	T/T	.	C/C	C/C	C/C	C/C	C/C	T/T	C/C	T/T	C/C	C/C	T/T	.	.	C/C	C/C	C/C	C/C	C/C	T/T
Pv02	10070116	ANNZ01004675-1_12528	G	A	.	G/G	.	A/A	A/A	G/G	G/G	G/G	G/G	G/A	G/G	G/G	G/G	G/G	A/A	A/A	A/A	G/G	G/G	G/G	G/G	G/G	G/G	G/G	G/G	.	A/A	A/A	A/A	G/G	G/G	G/G	G/G	G/G	G/G	G/G	G/G	.	.	A/A	A/A	G/G	G/G	G/G	G/G
Pv02	10105079	ANNZ01004683-1_8273	A	C	.	A/A	A/A	C/C	C/C	A/A	A/A	A/A	A/A	A/C	A/A	A/A	A/A	A/A	C/C	C/C	C/C	A/A	A/A	A/A	A/A	A/A	A/A	A/A	A/A	A/A	C/C	C/C	C/C	A/A	A/A	A/A	A/A	A/A	A/A	A/A	A/A	A/A	A/A	C/C	C/C	A/A	A/A	A/A	A/A
Pv02	10412916	ANNZ01004697-1_24406	G	A	.	.	.	.	.	G/G	G/G	.	G/G	G/G	G/G	G/G	G/G	G/G	.	.	G/G	.	.	G/G	G/G	G/G	G/G	G/G	.	.	.	.	.	G/G	.	.	G/G	.	G/G	G/G	.	.	.	.	.	G/G	.	G/G	.
Pv02	10616898	ANNZ01004710-1_1656	G	A	.	G/G	G/G	A/A	A/A	G/G	G/G	G/G	G/G	G/A	G/G	G/G	G/G	G/G	A/A	A/A	G/G	G/G	G/G	G/G	G/G	G/G	G/G	G/G	G/G	G/G	G/G	A/A	A/A	G/G	G/G	G/G	G/G	G/G	G/G	G/G	G/G	G/G	G/G	A/A	A/A	G/G	G/G	G/G	G/G
Pv02	10879425	ANNZ01004728-1_1332	C	.	.	C/C	.	C/C	C/C	C/C	C/C	C/C	C/C	C/C	C/C	C/C	C/C	C/C	C/C	C/C	C/C	C/C	C/C	C/C	C/C	C/C	C/C	C/C	C/C	.	C/C	C/C	C/C	C/C	C/C	C/C	C/C	C/C	C/C	C/C	C/C	.	.	C/C	C/C	C/C	C/C	C/C	C/C
Pv02	11182766	ANNZ01004752-1_31638	GAAAAAAAT	AAAAAAAAT	.	AAAAAAAAT/AAAAAAAAT	.	AAAAAAAAT/AAAAAAAAT	AAAAAAAAT/AAAAAAAAT	GAAAAAAAT/GAAAAAAAT	GAAAAAAAT/GAAAAAAAT	GAAAAAAAT/GAAAAAAAT	GAAAAAAAT/AAAAAAAAT	GAAAAAAAT/AAAAAAAAT	GAAAAAAAT/GAAAAAAAT	GAAAAAAAT/GAAAAAAAT	GAAAAAAAT/GAAAAAAAT	GAAAAAAAT/GAAAAAAAT	AAAAAAAAT/AAAAAAAAT	AAAAAAAAT/AAAAAAAAT	GAAAAAAAT/GAAAAAAAT	AAAAAAAAT/AAAAAAAAT	AAAAAAAAT/AAAAAAAAT	GAAAAAAAT/GAAAAAAAT	GAAAAAAAT/GAAAAAAAT	GAAAAAAAT/GAAAAAAAT	GAAAAAAAT/GAAAAAAAT	GAAAAAAAT/GAAAAAAAT	AAAAAAAAT/AAAAAAAAT	.	AAAAAAAAT/AAAAAAAAT	AAAAAAAAT/AAAAAAAAT	AAAAAAAAT/AAAAAAAAT	GAAAAAAAT/GAAAAAAAT	AAAAAAAAT/AAAAAAAAT	AAAAAAAAT/AAAAAAAAT	GAAAAAAAT/GAAAAAAAT	AAAAAAAAT/AAAAAAAAT	GAAAAAAAT/GAAAAAAAT	GAAAAAAAT/GAAAAAAAT	AAAAAAAAT/AAAAAAAAT	.	.	AAAAAAAAT/AAAAAAAAT	AAAAAAAAT/AAAAAAAAT	GAAAAAAAT/GAAAAAAAT	AAAAAAAAT/AAAAAAAAT	GAAAAAAAT/GAAAAAAAT	AAAAAAAAT/AAAAAAAAT
Pv02	11678014	ANNZ01004780-1_5202	T	C	.	T/T	T/T	T/T	T/T	T/T	T/T	T/T	T/T	T/T	T/T	T/T	T/T	T/T	T/T	T/T	C/C	T/T	T/T	T/T	T/T	T/T	T/T	T/T	T/T	T/T	T/T	T/T	T/T	T/T	T/T	T/T	T/T	T/T	T/T	T/T	T/T	T/T	T/T	T/T	T/T	T/T	T/T	T/T	T/T
Pv02	11762500	ANNZ01004787-1_43639	T	C	.	C/C	.	C/C	C/C	T/T	T/T	C/C	T/C	T/C	T/T	T/T	T/T	T/T	C/C	C/C	C/C	C/C	C/C	T/T	T/T	T/T	T/T	T/T	C/C	.	C/C	C/C	C/C	T/T	C/C	C/C	T/T	C/C	T/T	T/T	C/C	.	.	C/C	C/C	T/T	C/C	T/T	C/C
Pv02	12192156	ANNZ01004808-1_3427	C	T	.	C/C	.	T/T	T/T	C/C	C/C	T/T	C/T	C/T	C/C	C/C	C/C	C/C	C/C	C/C	T/T	T/T	T/T	C/C	C/C	C/C	C/C	C/C	C/C	.	T/T	C/C	C/C	C/C	C/C	T/T	C/C	T/T	C/C	C/C	C/C	.	.	C/C	C/C	C/C	C/C	C/C	C/C
Pv02	12264973	ANNZ01004810-1_6166	A	C	.	.	.	.	.	.	.	.	.	.	.	.	.	.	.	.	.	.	.	.	.	.	.	.	.	.	.	.	.	.	.	.	.	.	.	.	.	.	.	.	.	.	.	.	.
Pv02	12320037	ANNZ01004811-1_5715	A	C	.	A/A	.	C/C	C/C	A/A	A/A	C/C	A/C	A/C	A/A	A/A	A/A	A/A	A/A	A/A	C/C	A/A	C/C	A/A	A/A	A/A	A/A	A/A	A/A	.	C/C	A/A	A/A	A/A	A/A	C/C	A/A	C/C	A/A	A/A	A/A	.	.	A/A	A/A	A/A	A/A	A/A	A/A
Pv02	12607143	ANNZ01004831-1_15867	T	G	.	G/G	.	G/G	G/G	T/T	T/T	G/G	T/G	T/G	T/T	T/T	T/T	T/T	G/G	G/G	G/G	G/G	G/G	T/T	T/T	T/T	T/T	T/T	G/G	.	G/G	G/G	G/G	T/T	G/G	G/G	T/T	G/G	T/T	T/T	G/G	.	.	G/G	G/G	T/T	G/G	T/T	G/G
Pv02	12794568	ANNZ01004834-1_83326	A	C	.	A/A	.	A/A	A/A	A/A	A/A	A/A	A/A	A/A	A/A	A/A	A/A	A/A	A/A	C/C	A/A	A/A	A/A	A/A	A/A	A/A	A/A	A/A	A/A	.	A/A	C/C	C/C	A/A	C/C	C/C	A/A	A/A	A/A	A/A	A/A	.	.	C/C	C/C	A/A	C/C	A/A	A/A
Pv02	13056075	ANNZ01004846-1_12403	G	.	.	G/G	.	G/G	G/G	G/G	G/G	G/G	G/G	G/G	G/G	G/G	G/G	G/G	G/G	G/G	G/G	G/G	G/G	G/G	G/G	G/G	G/G	G/G	G/G	.	G/G	G/G	G/G	G/G	G/G	G/G	G/G	G/G	G/G	G/G	G/G	.	.	G/G	G/G	G/G	G/G	G/G	G/G
Pv02	13184263	ANNZ01004851-1_32250	G	A	.	A/A	A/A	G/G	G/G	G/G	G/G	G/G	G/G	G/G	G/G	G/G	G/G	G/G	A/A	A/A	G/G	A/A	G/G	G/G	G/G	G/G	G/G	G/G	A/A	A/A	G/G	A/A	A/A	G/G	A/A	A/A	G/G	G/G	G/G	G/G	A/A	G/A	G/A	A/A	A/A	G/G	A/A	G/G	A/A
Pv02	13283626	ANNZ01004852-1_21419	G	A	.	A/A	G/G	G/G	G/G	G/G	G/G	G/G	G/G	G/G	G/G	G/G	G/G	G/G	A/A	A/A	G/G	A/A	A/A	G/G	G/G	G/G	G/G	G/G	A/A	G/A	G/G	A/A	A/A	G/G	G/G	A/A	G/G	A/A	G/G	G/G	A/A	.	G/G	A/A	A/A	G/G	G/G	G/G	A/A
Pv02	13396278	ANNZ01004855-1_53973	G	A	.	A/A	G/G	G/G	G/G	G/G	G/G	G/G	G/G	G/G	G/G	G/G	G/G	G/G	A/A	A/A	G/G	A/A	A/A	G/G	G/G	G/G	G/G	G/G	A/A	G/G	G/G	A/A	A/A	G/G	G/G	A/A	G/G	A/A	G/G	G/G	A/A	G/G	G/G	A/A	A/A	G/G	G/G	G/G	G/G
Pv02	13572494	ANNZ01004862-1_93190	A	G	.	G/G	A/A	A/A	A/A	A/A	A/A	A/A	A/A	A/A	A/A	A/A	A/A	A/A	G/G	G/G	A/A	G/G	G/G	A/A	A/A	A/A	A/A	A/A	G/G	A/A	A/A	G/G	G/G	A/A	A/A	G/G	A/A	G/G	A/A	A/A	G/G	A/A	A/A	G/G	G/G	A/A	A/A	A/A	A/A
Pv02	14141608	ANNZ01004891-1_10930	G	A	.	.	.	.	.	G/G	G/G	.	G/G	G/G	G/G	G/G	G/G	G/G	.	.	.	.	.	G/G	G/G	G/G	G/G	G/G	.	.	.	.	.	G/G	.	.	G/G	.	G/G	G/G	.	.	.	.	.	G/G	.	G/G	G/G
Pv02	14684234	ANNZ01004920-1_57294	C	T	.	C/C	.	T/T	T/T	C/C	C/C	T/T	C/C	C/T	C/C	C/C	C/C	C/C	T/T	T/T	T/T	C/C	C/C	C/C	C/C	C/C	C/C	C/C	C/C	.	T/T	T/T	T/T	C/C	T/T	T/T	C/C	C/C	C/C	C/C	C/C	.	.	T/T	T/T	C/C	T/T	C/C	C/C
Pv02	14792196	ANNZ01004929-1_13169	A	G	.	A/A	G/G	G/G	G/G	A/A	A/A	G/G	A/A	A/G	A/A	A/A	A/A	A/A	G/G	G/G	G/G	A/A	A/A	A/A	A/A	A/A	A/A	A/A	A/A	G/G	G/G	G/G	G/G	A/A	G/G	G/G	A/A	A/A	A/A	A/A	A/A	G/G	G/G	G/G	G/G	A/A	G/G	A/A	A/A
Pv02	14875746	ANNZ01004931-1_31742	G	A	.	A/A	.	G/G	G/G	G/G	G/G	G/G	G/G	G/G	G/G	G/G	G/G	G/G	G/G	G/G	G/G	A/A	A/A	G/G	G/G	G/G	G/G	G/G	A/A	.	G/G	G/G	G/G	G/G	G/G	G/G	G/G	A/A	G/G	G/G	A/A	.	.	G/G	G/G	G/G	G/G	G/G	G/G
Pv02	17448654	ANNZ01005226-1_9012	C	T	.	C/C	C/C	T/T	T/T	C/C	C/C	T/T	C/C	C/T	C/C	C/C	C/C	C/C	C/C	T/T	T/T	T/T	C/C	C/C	C/C	C/C	C/C	C/C	C/C	C/C	T/T	T/T	T/T	C/C	C/C	T/T	C/C	C/C	C/C	C/C	C/C	C/C	C/C	T/T	T/T	C/C	C/C	C/C	C/C
Pv02	17583918	ANNZ01005240-1_2535	A	C	.	C/C	.	C/C	C/C	A/A	A/A	C/C	A/A	A/C	A/A	A/A	A/A	A/A	C/C	C/C	C/C	C/C	C/C	A/A	A/A	A/A	A/A	A/A	C/C	.	C/C	C/C	C/C	A/A	C/C	C/C	A/A	C/C	A/A	A/A	C/C	.	.	C/C	C/C	A/A	C/C	A/A	A/A
Pv02	21430808	ANNZ01005591-1_28540	C	T	.	C/C	.	T/T	T/T	C/C	C/C	T/T	C/C	C/T	C/C	C/C	C/C	C/C	T/T	T/T	T/T	T/T	C/C	C/C	C/C	C/C	C/C	C/C	T/T	.	T/T	T/T	T/T	C/C	T/T	T/T	C/C	C/C	C/C	C/C	T/T	.	.	T/T	T/T	C/C	T/T	C/C	C/C
Pv02	21792289	ANNZ01005614-1_21958	G	A	.	G/G	.	G/G	G/G	A/A	A/A	G/G	A/A	G/G	A/A	A/A	A/A	A/A	G/G	G/G	G/G	G/G	G/G	A/A	A/A	A/A	A/A	A/A	G/G	G/A	G/G	G/G	G/G	G/G	G/G	G/G	A/A	G/G	A/A	A/A	G/G	.	.	G/G	G/G	A/A	G/G	G/G	A/A
Pv02	23053780	ANNZ01005680-1_36957	A	C	.	A/A	.	A/A	C/C	A/A	A/A	A/A	A/A	A/C	A/A	A/A	A/A	A/A	A/A	A/A	C/C	A/A	A/A	A/A	A/A	A/A	A/A	A/A	A/A	.	A/A	A/A	A/A	A/A	A/A	A/A	A/A	A/A	A/A	A/A	A/A	.	.	A/A	A/A	A/A	A/A	A/A	A/A
Pv02	23255852	ANNZ01005690-1_8334	A	G	.	G/G	A/A	G/G	G/G	A/A	A/A	G/G	A/A	A/G	A/A	A/A	A/A	A/A	G/G	G/G	G/G	G/G	G/G	A/A	A/A	A/A	A/A	A/A	G/G	A/A	G/G	G/G	G/G	A/A	G/G	G/G	A/A	A/A	A/A	A/A	G/G	A/A	A/A	G/G	G/G	A/A	G/G	A/A	A/A
Pv02	23489737	ANNZ01005700-1_5201	C	A	.	C/C	.	C/C	C/C	A/A	A/A	C/C	A/A	C/A	A/A	A/A	A/A	A/A	A/A	A/A	C/C	C/C	C/C	A/A	A/A	A/A	A/A	A/A	C/C	.	C/C	A/A	A/A	A/A	C/C	A/A	A/A	A/A	A/A	A/A	C/C	.	.	A/A	A/A	A/A	C/C	A/A	A/A
Pv02	23542475	ANNZ01005706-1_3414	T	C	.	T/T	C/C	T/T	T/T	C/C	C/C	T/T	C/C	T/C	C/C	C/C	C/C	C/C	C/C	C/C	T/T	T/T	T/T	C/C	C/C	C/C	C/C	C/C	T/T	C/C	T/T	C/C	C/C	C/C	T/T	C/C	C/C	C/C	C/C	C/C	T/T	C/C	C/C	C/C	C/C	C/C	T/T	C/C	C/C
Pv02	23644618	ANNZ01005719-1_1677	C	T	.	C/C	.	C/C	C/C	T/T	T/T	C/C	T/T	C/T	T/T	T/T	T/T	T/T	T/T	T/T	C/C	C/C	C/C	T/T	T/T	T/T	T/T	T/T	C/C	.	C/C	T/T	T/T	T/T	C/C	T/T	T/T	T/T	T/T	T/T	C/C	.	.	T/T	T/T	T/T	C/C	T/T	T/T
Pv02	24010885	ANNZ01005751-1_1694	T	G	.	G/G	.	T/T	G/G	T/T	T/T	G/G	T/T	T/G	T/T	T/T	T/T	T/T	G/G	G/G	G/G	G/G	T/T	T/T	T/T	T/T	T/T	T/T	T/T	.	T/T	G/G	G/G	T/T	T/T	T/T	T/T	T/T	T/T	T/T	T/T	.	.	G/G	G/G	T/T	T/T	T/T	T/T
Pv02	24142792	ANNZ01005754-1_13786	C	T	.	T/T	.	C/C	T/T	C/C	C/C	T/T	C/C	C/T	C/C	C/C	C/C	C/C	T/T	T/T	T/T	T/T	C/C	C/C	C/C	C/C	C/C	C/C	C/C	.	C/C	T/T	T/T	C/C	C/C	C/C	C/C	C/C	C/C	C/C	C/C	.	.	T/T	T/T	C/C	C/C	C/C	C/C
Pv02	24446194	ANNZ01005775-1_35286	G	A	.	G/G	A/A	A/A	A/A	G/G	G/G	A/A	G/G	G/A	G/G	G/G	G/G	G/G	G/G	G/G	A/A	G/G	G/G	G/G	G/G	G/G	G/G	G/G	A/A	A/A	A/A	G/G	G/G	G/G	A/A	G/G	G/G	G/G	G/G	G/G	A/A	A/A	A/A	G/G	G/G	G/G	A/A	G/G	G/G
Pv02	24587572	ANNZ01005779-1_4103	T	G	.	T/T	.	G/G	G/G	T/T	T/T	G/G	T/T	T/G	T/T	T/T	T/T	T/T	T/T	T/T	G/G	T/T	T/T	T/T	T/T	T/T	T/T	T/T	T/T	T/G	G/G	T/T	T/T	T/T	G/G	T/T	T/T	T/T	T/T	T/T	T/T	G/G	G/G	T/T	T/T	T/T	G/G	T/T	T/T
Pv02	24689664	ANNZ01005781-1_5341	C	A	.	C/C	.	C/C	A/A	C/C	C/C	A/A	C/C	C/A	C/C	C/C	C/C	C/C	C/C	C/C	A/A	C/C	C/C	C/C	C/C	C/C	C/C	C/C	C/C	.	C/C	C/C	C/C	C/C	A/A	C/C	C/C	C/C	C/C	C/C	C/C	.	.	C/C	C/C	C/C	A/A	C/C	C/C
Pv02	25522297	ANNZ01005855-1_52063	A	C	.	C/C	.	A/A	C/C	A/A	A/A	C/C	A/A	A/A	A/A	A/A	A/A	A/A	A/A	A/A	C/C	A/A	A/A	A/A	A/A	A/A	A/A	A/A	A/A	.	A/A	A/A	A/A	A/A	C/C	A/A	A/A	A/A	A/A	A/A	A/A	.	.	A/A	A/A	A/A	C/C	A/A	A/A
Pv02	27287052	ANNZ01005923-1_13359	A	G	.	G/G	A/A	G/G	G/G	A/A	A/A	G/G	A/A	A/A	A/A	A/A	A/A	A/A	G/G	G/G	G/G	A/A	G/G	G/G	A/A	A/A	A/A	A/A	A/A	A/A	G/G	G/G	G/G	A/A	G/G	G/G	A/A	A/A	A/A	A/A	A/A	A/A	A/A	G/G	G/G	A/A	G/G	A/A	A/A
Pv02	33041575	ANNZ01006186-1_110339	T	C	.	C/C	C/C	T/T	C/C	T/T	T/T	C/C	T/T	T/C	T/T	T/T	T/T	T/T	T/T	T/T	C/C	T/T	C/C	C/C	T/T	T/T	T/T	T/T	T/T	C/C	T/T	T/T	T/T	T/T	T/T	C/C	T/T	T/T	T/T	T/T	C/C	C/C	C/C	C/C	T/T	T/T	T/T	T/T	T/T
Pv02	33268254	ANNZ01006201-1_25039	T	C	.	C/C	.	C/C	C/C	T/T	T/T	C/C	T/T	T/C	T/T	T/T	T/T	T/T	C/C	C/C	C/C	C/C	C/C	C/C	T/T	T/T	T/T	T/T	T/T	.	C/C	C/C	C/C	T/T	C/C	C/C	T/T	T/T	T/T	T/T	C/C	.	.	C/C	C/C	T/T	C/C	T/T	T/T
Pv02	33889745	ANNZ01006226-1_69162	T	C	.	C/C	T/T	T/T	T/T	T/T	T/T	T/T	T/T	T/C	T/T	T/T	T/T	T/T	T/T	T/T	T/T	C/C	C/C	C/C	T/T	T/T	T/T	T/T	T/T	T/T	T/T	T/T	T/T	T/T	T/T	C/C	T/T	T/T	T/T	T/T	C/C	T/T	T/T	T/C	T/T	T/T	T/T	T/T	T/T
Pv02	34002403	ANNZ01006237-1_2348	C	T	.	C/C	.	C/C	C/C	C/C	C/C	C/C	C/C	C/T	C/C	C/C	C/C	C/C	C/C	C/C	C/C	T/T	T/T	T/T	C/C	C/C	C/C	C/C	C/C	.	C/C	C/C	C/C	C/C	C/C	T/T	C/C	C/C	C/C	C/C	C/C	.	.	C/T	C/C	C/C	C/C	C/C	C/C
Pv02	35039376	ANNZ01006282-1_100330	A	G	.	A/A	.	A/A	A/A	A/A	A/A	A/A	A/A	A/A	A/A	A/A	A/A	A/A	G/G	A/A	A/A	A/A	A/A	A/A	A/A	A/A	A/A	A/A	A/A	A/A	G/G	A/A	A/A	G/G	A/A	A/A	A/A	A/A	A/A	A/A	A/A	.	.	A/A	A/A	G/G	A/A	A/A	A/A
Pv02	35511686	ANNZ01006304-1_17053	T	C	.	T/T	T/C	C/C	C/C	T/T	T/T	C/C	T/T	T/T	T/T	T/T	T/T	T/T	C/C	C/C	C/C	C/C	T/T	T/T	T/T	T/T	T/T	T/T	T/T	T/C	C/C	C/C	C/C	C/C	C/C	T/T	T/T	T/T	T/T	T/T	C/C	.	T/C	C/C	C/C	C/C	C/C	T/T	T/T
Pv02	37562924	ANNZ01006408-1_36029	G	A	.	G/G	.	G/G	A/A	G/G	G/G	A/A	G/G	G/G	G/G	G/G	G/G	G/G	A/A	G/G	A/A	G/G	A/A	G/G	G/G	G/G	G/G	G/G	G/G	.	G/G	G/G	G/G	G/G	G/G	G/G	G/G	G/G	G/G	G/G	G/G	.	.	G/G	G/G	G/G	G/G	G/G	G/G
Pv02	37883135	ANNZ01006429-1_39863	C	T	.	T/T	C/C	T/T	C/C	C/C	C/C	C/C	C/C	C/C	C/C	C/C	C/C	C/C	C/C	T/T	C/C	T/T	T/T	C/C	C/C	C/C	C/C	C/C	C/C	C/C	T/T	T/T	T/T	C/C	T/T	C/C	C/C	C/C	C/C	C/C	T/T	C/C	C/C	T/T	T/T	C/C	T/T	C/C	C/C
Pv02	38769202	ANNZ01006470-1_1951	C	T	.	C/C	.	C/C	C/C	C/C	.	C/C	C/C	C/C	C/C	C/C	C/C	C/C	C/C	C/C	C/C	C/C	C/C	C/C	C/C	C/C	C/C	C/C	C/C	.	C/C	C/C	C/C	C/C	C/C	C/C	C/C	C/C	C/C	C/C	C/C	.	.	C/C	C/C	.	C/C	C/C	C/C
Pv02	43001848	ANNZ01006663-1_18464	C	A	.	C/C	C/C	C/C	A/A	C/C	C/C	A/A	C/C	C/C	C/C	C/C	C/C	C/C	C/C	C/C	A/A	C/C	C/C	C/C	C/C	C/C	C/C	C/C	C/C	C/C	C/C	C/C	C/C	C/C	A/A	C/C	C/C	C/C	C/C	C/C	C/C	C/C	C/C	C/C	C/C	C/C	A/A	C/C	C/C
Pv02	44374642	ANNZ01006708-1_13922	A	G	.	A/A	.	A/A	G/G	A/A	A/A	A/A	A/A	A/A	G/G	A/A	A/A	A/A	A/A	A/A	G/G	A/A	A/A	A/A	A/A	A/A	A/A	A/A	A/A	.	A/A	A/A	A/A	A/A	A/A	A/A	A/A	A/A	A/A	A/A	G/G	.	.	A/A	A/A	G/G	A/A	G/G	A/A
Pv02	44676606	ANNZ01006715-1_65503	T	C	.	T/T	T/T	T/T	T/T	T/T	T/T	C/C	T/T	T/T	T/T	T/T	T/T	T/T	T/T	T/T	T/T	T/T	T/T	T/T	T/T	T/T	T/T	T/T	T/T	T/T	T/T	T/T	T/T	T/T	T/T	T/T	T/T	T/T	T/T	T/T	T/T	T/T	T/T	T/T	T/T	T/T	T/T	T/T	T/T
Pv02	44774570	ANNZ01006716-1_92253	A	G	.	A/A	A/A	G/G	A/A	A/A	A/A	G/G	A/A	A/G	A/A	A/A	A/A	A/A	A/A	G/G	A/A	A/A	G/G	A/A	A/A	A/A	A/A	A/A	A/A	A/A	A/A	G/G	G/G	A/A	A/A	A/A	A/A	A/A	A/A	A/A	A/A	A/A	A/A	A/G	G/G	A/A	A/A	A/A	A/A
Pv02	44959429	ANNZ01006727-1_70594	T	G	.	T/T	.	G/G	T/T	T/T	T/T	G/G	T/T	T/G	T/T	T/T	T/T	T/T	T/T	G/G	T/T	T/T	G/G	T/T	T/T	T/T	T/T	T/T	T/T	.	T/T	G/G	G/G	T/T	T/T	T/T	T/T	T/T	T/T	T/T	T/T	.	.	G/G	G/G	T/T	T/T	T/T	T/T
Pv02	45319981	ANNZ01006739-1_60420	G	T	.	T/T	G/G	T/T	G/G	G/G	G/G	T/T	G/G	G/T	G/G	G/G	G/G	G/G	G/G	T/T	G/G	G/G	T/T	G/G	G/G	G/G	G/G	G/G	G/G	G/G	G/G	T/T	T/T	G/G	G/G	G/G	G/G	G/G	G/G	G/G	G/G	G/G	G/G	T/T	T/T	G/G	G/G	G/G	G/G
Pv02	45420131	ANNZ01006741-1_17556	C	T	.	C/C	C/C	T/T	T/T	C/C	C/C	T/T	C/C	C/T	C/C	C/C	C/C	C/C	C/C	T/T	T/T	C/C	C/C	C/C	C/C	C/C	C/C	C/C	C/C	C/C	C/C	T/T	T/T	C/C	C/C	C/C	C/C	C/C	C/C	C/C	C/C	C/C	C/C	T/T	T/T	C/C	C/C	T/T	C/C
Pv02	45739491	ANNZ01006750-1_18837	C	T	.	T/T	T/T	C/C	C/C	C/C	C/C	C/C	C/T	C/C	T/T	C/C	T/T	T/T	T/T	C/C	C/C	T/T	T/T	C/C	C/T	T/T	T/T	C/C	T/T	T/T	T/T	C/C	C/C	T/T	C/C	C/C	C/C	C/C	T/T	C/C	T/T	T/T	T/T	C/C	C/C	C/C	C/C	C/C	C/C
Pv02	46250566	ANNZ01006760-1_55138	T	G	.	T/T	T/T	G/G	T/T	T/T	T/T	G/G	T/T	T/T	T/T	T/T	T/T	T/T	T/T	G/G	T/T	T/T	T/T	T/T	T/T	T/T	T/T	T/T	T/T	T/T	T/T	G/G	G/G	T/T	T/T	T/T	T/T	T/T	T/T	T/T	T/T	T/T	T/T	G/G	G/G	T/T	T/T	T/T	T/T
Pv02	46336266	ANNZ01006761-1_14181	G	A	.	G/G	.	A/A	A/A	G/G	G/G	A/A	G/G	G/A	G/G	G/G	G/G	G/G	A/A	A/A	A/A	G/G	G/G	G/G	G/G	G/G	G/G	G/G	G/G	.	A/A	A/A	A/A	G/G	G/G	G/G	G/G	G/G	G/G	G/G	A/A	.	.	A/A	A/A	G/G	G/G	G/G	G/G
Pv02	46519930	ANNZ01006763-1_26401	T	C	.	C/C	C/C	C/C	C/C	T/T	T/T	C/C	T/T	T/C	T/T	T/T	T/T	T/T	C/C	C/C	C/C	C/C	C/C	T/T	T/T	T/T	T/T	T/T	T/T	C/C	C/C	C/C	C/C	T/T	C/C	T/T	T/T	T/T	T/T	T/T	C/C	C/C	C/C	C/C	C/C	T/T	C/C	T/T	T/T
Pv02	47987061	ANNZ01006791-1_39866	C	T	.	C/C	.	C/C	C/C	T/T	T/T	C/C	C/T	C/T	C/C	T/T	T/T	T/T	C/C	C/C	C/C	C/C	T/T	C/C	C/C	C/C	C/C	C/C	T/T	.	C/C	C/C	C/C	C/C	C/C	C/C	C/C	C/C	T/T	C/C	C/C	.	.	C/C	C/C	T/T	C/C	T/T	C/C
Pv02	48030706	ANNZ01006791-1_83511	A	C	.	A/A	A/A	A/A	A/A	C/C	C/C	A/A	A/C	A/C	A/A	C/C	C/C	C/C	A/A	A/A	A/A	A/A	A/A	A/A	A/A	A/A	A/A	A/A	C/C	A/A	A/A	A/A	A/A	A/A	A/A	A/A	A/A	A/A	C/C	A/A	A/A	A/A	A/A	A/A	A/A	C/C	A/A	C/C	A/A
Pv02	48160108	ANNZ01006793-1_2217	G	T	.	G/G	.	G/G	T/T	G/G	G/G	T/T	G/G	G/G	G/G	G/G	G/G	G/G	G/G	G/G	T/T	G/G	G/G	G/G	G/G	G/G	G/G	G/G	G/G	.	G/G	G/G	G/G	G/G	G/G	G/G	G/G	G/G	G/G	G/G	T/T	.	.	G/G	G/G	G/G	G/G	G/G	G/G
Pv03	61877	ANNZ01006822-1_61877	A	G	.	A/A	.	G/G	A/A	A/A	G/G	A/A	A/A	A/A	A/A	A/A	A/A	G/G	G/G	G/G	A/A	G/G	G/G	A/A	A/G	A/A	A/A	A/A	G/G	.	A/A	G/G	G/G	A/A	G/G	A/A	A/A	A/A	G/G	G/G	G/G	.	.	G/G	G/G	A/A	G/G	A/A	G/G
Pv03	173774	ANNZ01006826-1_18020	G	T	.	G/G	T/T	G/G	T/T	G/G	G/G	T/T	G/G	G/G	G/G	G/G	G/G	G/G	T/T	G/G	T/T	T/T	T/T	G/G	G/G	G/G	G/G	G/G	G/G	T/T	G/G	G/T	G/G	G/G	G/G	G/G	G/G	G/G	G/G	G/G	T/T	T/T	T/T	G/G	G/G	G/G	G/G	G/G	T/T
Pv03	319870	ANNZ01006830-1_5208	G	A	.	G/G	G/G	G/G	A/A	G/G	G/G	A/A	G/G	G/G	G/G	G/G	G/G	G/G	A/A	G/G	A/A	G/G	G/G	G/G	G/G	G/G	G/G	G/G	G/G	G/G	A/A	G/A	G/G	G/G	G/G	G/G	G/G	G/G	G/G	G/G	A/A	G/G	G/G	G/G	G/G	G/G	G/G	G/G	G/G
Pv03	480199	ANNZ01006836-1_58718	A	C	.	C/C	A/A	C/C	A/A	A/A	A/A	A/A	A/A	A/A	A/A	A/A	A/A	C/C	C/C	C/C	A/A	A/A	C/C	A/A	A/A	A/A	A/A	A/A	A/A	A/A	A/A	C/C	C/C	A/A	C/C	A/A	A/A	A/A	A/A	A/A	C/C	A/A	A/A	C/C	C/C	A/A	C/C	A/A	C/C
Pv03	565194	ANNZ01006837-1_36661	C	T	.	T/T	C/C	T/T	C/C	C/C	T/T	C/C	T/T	C/T	T/T	C/C	T/T	T/T	T/T	T/T	C/C	T/T	T/T	C/C	C/T	T/T	T/T	C/C	C/C	C/C	C/C	C/T	T/T	C/C	T/T	C/C	T/T	T/T	T/T	T/T	C/C	C/C	C/C	T/T	T/T	C/C	T/T	C/C	C/C
Pv03	886258	ANNZ01006852-1_42215	T	C	.	T/T	C/C	T/T	C/C	T/T	T/T	C/C	T/T	T/T	T/T	T/T	T/T	T/T	T/T	T/T	C/C	T/T	T/T	T/T	T/T	T/T	T/T	T/T	T/T	C/C	C/C	T/C	T/T	T/T	T/T	T/T	T/T	T/T	T/T	T/T	C/C	C/C	C/C	T/T	T/T	T/T	T/T	T/T	T/T
Pv03	907610	ANNZ01006853-1_13468	G	A	.	G/G	A/A	G/G	G/G	G/G	G/G	G/G	G/G	G/G	G/G	G/G	G/G	G/G	A/A	G/G	G/G	G/G	A/A	G/G	G/G	G/G	G/G	G/G	G/G	A/A	G/G	G/G	G/G	G/G	G/G	G/G	G/G	G/G	G/G	G/G	G/G	A/A	A/A	G/G	G/G	G/G	G/G	G/G	G/G
Pv03	1086776	ANNZ01006862-1_48083	G	A	.	G/G	A/A	G/G	G/G	G/G	G/G	G/G	G/G	G/G	G/G	G/G	G/G	G/G	G/G	G/G	G/G	G/G	G/G	G/G	G/G	G/G	G/G	G/G	G/G	A/A	A/A	G/G	G/G	G/G	G/G	G/G	G/G	G/G	G/G	G/G	G/G	A/A	A/A	G/G	G/G	A/A	G/G	G/G	G/G
Pv03	1190575	ANNZ01006863-1_51854	C	A	.	C/C	.	C/C	A/A	C/C	C/C	A/A	C/C	C/C	C/C	C/C	C/C	C/C	A/A	C/C	A/A	A/A	C/C	C/C	C/C	C/C	C/C	C/C	C/C	.	A/A	C/C	C/C	C/C	C/C	C/C	C/C	C/C	C/C	C/C	C/C	.	.	C/C	C/C	C/C	C/C	C/C	C/C
Pv03	1335020	ANNZ01006865-1_6473	G	A	.	A/A	.	A/A	G/G	G/G	.	A/A	.	.	.	G/G	.	.	.	A/A	A/A	.	A/A	.	.	.	.	G/G	.	.	.	A/A	A/A	.	A/A	.	.	.	.	.	A/A	.	.	A/A	A/A	A/A	A/A	.	.
Pv03	1870375	ANNZ01006880-1_52112	T	C	.	T/T	.	T/T	C/C	T/T	T/T	C/C	T/T	T/T	T/T	T/T	T/T	T/T	C/C	T/T	C/C	T/T	T/T	T/T	T/T	T/T	T/T	T/T	T/T	.	T/T	T/C	T/T	T/T	T/T	T/T	T/T	T/T	T/T	T/T	C/C	.	.	T/T	T/T	T/T	T/T	T/T	T/T
Pv03	2082674	ANNZ01006881-1_76050	A	G	.	G/G	.	A/A	A/G	A/A	A/A	G/G	A/A	A/A	A/A	A/A	A/A	A/A	G/G	A/A	G/G	G/G	G/G	A/A	A/A	A/A	A/G	A/A	A/A	.	A/A	A/G	A/A	A/A	A/A	A/A	A/A	A/A	A/A	A/A	G/G	.	.	A/A	A/A	A/A	A/A	A/A	A/A
Pv03	2121717	ANNZ01006882-1_16483	C	T	.	C/C	C/C	C/C	C/C	C/C	C/C	C/C	C/C	T/T	C/C	T/T	T/T	T/T	C/C	C/C	C/C	C/C	C/C	T/T	T/T	C/C	C/C	C/C	C/C	C/C	C/C	C/C	C/C	C/C	C/C	C/C	C/C	C/C	T/T	T/T	C/C	C/C	C/C	C/C	C/C	T/T	C/C	T/T	T/T
Pv03	2275208	ANNZ01006885-1_79069	A	G	.	A/A	A/A	A/A	G/G	A/A	A/A	G/G	A/A	A/A	A/A	A/A	A/A	A/A	G/G	A/A	G/G	A/A	A/A	A/A	A/A	A/A	A/A	A/A	A/A	A/A	G/G	A/G	A/A	A/A	A/A	A/A	A/A	A/A	A/A	A/A	G/G	A/A	A/A	A/A	A/A	A/A	A/A	A/A	A/A
Pv03	2620505	ANNZ01006889-1_26523	G	A	.	A/A	G/G	G/G	G/G	G/G	G/G	G/G	G/G	G/G	G/G	G/G	G/G	G/G	G/G	G/G	G/G	A/A	A/A	G/G	G/G	G/G	A/A	G/G	G/G	G/G	G/G	G/G	G/G	G/G	A/A	G/G	G/G	G/G	G/G	G/G	G/G	G/G	G/G	G/G	G/G	G/G	A/A	G/G	G/G
Pv03	3044489	ANNZ01006905-1_11306	G	A	.	A/A	.	A/A	A/A	G/G	G/G	A/A	G/G	G/G	G/G	G/G	G/G	G/G	A/A	A/A	A/A	G/G	G/G	G/G	G/G	G/G	G/G	G/G	G/G	.	A/A	A/A	A/A	G/G	G/G	G/G	G/G	G/G	G/G	G/G	A/A	.	.	A/A	A/A	A/A	A/A	G/G	G/G
Pv03	3183842	ANNZ01006911-1_30393	A	C	.	.	.	.	.	A/A	A/A	.	A/C	A/A	C/C	A/A	C/C	C/C	.	.	.	.	.	A/A	A/A	C/C	.	A/A	C/C	.	.	.	.	C/C	.	A/A	C/C	C/C	C/C	.	.	.	.	.	.	.	.	A/A	A/A
Pv03	3298438	ANNZ01006917-1_20958	A	G	.	.	.	.	.	.	.	.	.	.	G/G	.	G/G	G/G	.	.	.	.	.	.	.	.	.	.	G/G	.	.	.	.	.	.	.	.	.	.	.	.	.	.	.	.	.	.	.	.
Pv03	3433066	ANNZ01006922-1_4223	T	G	.	G/G	T/T	G/G	T/T	T/T	T/T	T/T	T/T	T/T	T/T	T/T	T/T	T/T	G/G	T/G	T/T	G/G	G/G	T/T	T/T	T/T	G/G	T/T	T/T	T/T	G/G	T/G	G/G	T/T	G/G	T/T	T/T	T/T	T/T	G/G	T/T	T/T	T/T	G/G	G/G	G/G	T/T	T/T	T/T
Pv03	3670201	ANNZ01006934-1_73649	A	G	.	A/A	.	G/G	G/G	A/A	A/A	G/G	A/A	A/A	A/A	A/A	A/A	A/A	G/G	G/G	G/G	G/G	G/G	A/A	A/A	A/A	G/G	A/A	A/A	.	G/G	G/G	G/G	A/A	G/G	A/A	A/A	A/A	A/A	G/G	G/G	.	.	G/G	G/G	A/A	G/G	A/A	A/A
Pv03	3963582	ANNZ01006951-1_22699	T	C	.	C/C	C/C	C/C	C/C	C/C	C/C	C/C	T/C	T/T	C/C	T/T	T/T	T/T	C/C	C/C	C/C	C/C	C/C	T/T	T/T	C/C	C/C	T/T	T/T	T/C	C/C	C/C	C/C	C/C	C/C	T/T	T/T	C/C	T/T	C/C	C/C	.	.	C/C	C/C	T/T	C/C	T/T	T/T
Pv03	4059842	ANNZ01006957-1_87054	A	G	.	G/G	G/G	G/G	G/G	A/A	A/A	G/G	A/A	A/A	A/A	A/A	A/A	A/A	A/A	A/G	G/G	G/G	G/G	A/A	A/A	A/A	G/G	A/A	A/A	G/G	A/A	G/G	G/G	A/A	G/G	A/A	A/A	A/A	A/A	A/A	G/G	G/G	G/G	G/G	G/G	A/A	G/G	A/A	A/A
Pv03	4897581	ANNZ01006992-1_95775	T	G	.	G/G	T/T	G/G	G/G	T/T	T/T	G/G	T/T	T/T	G/G	T/T	T/T	T/T	T/T	G/G	G/G	G/G	G/G	T/T	T/T	G/G	T/T	T/T	T/T	T/T	T/T	G/G	G/G	T/T	G/G	T/T	T/T	T/T	T/T	G/G	G/G	T/T	T/T	G/G	G/G	T/T	G/G	T/T	G/G
Pv03	4979967	ANNZ01007003-1_4166	G	A	.	A/A	.	A/A	A/A	G/G	G/G	A/A	G/G	G/G	A/A	G/G	G/G	G/G	G/G	A/A	A/A	A/A	A/A	G/G	G/G	A/A	G/G	G/G	G/G	.	G/G	A/A	A/A	G/G	A/A	G/G	G/G	G/G	G/G	A/A	A/A	.	.	A/A	A/A	G/G	A/A	G/G	A/A
Pv03	5023787	ANNZ01007005-1_1045	A	G	.	A/A	A/A	A/A	A/A	A/A	A/A	A/A	A/A	A/A	A/A	A/A	A/A	A/A	G/G	A/A	A/A	A/A	A/A	A/A	A/A	A/A	A/A	A/A	A/A	A/A	G/G	A/G	A/A	A/A	A/A	A/A	A/A	A/A	A/A	A/A	G/G	A/A	A/A	A/A	A/A	A/A	A/A	A/A	A/A
Pv03	5147546	ANNZ01007007-1_13153	C	A;T	.	C/C	A/T	C/C	C/C	C/C	C/C	C/C	C/C	C/C	C/C	C/C	A/A	A/A	C/C	C/C	C/C	C/C	C/C	C/C	C/C	C/C	A/A	C/C	A/A	C/T	C/C	C/C	C/C	A/A	C/C	C/C	C/C	C/C	A/A	C/C	C/C	C/T	A/T	C/C	C/C	C/C	C/C	C/C	C/C
Pv03	5472029	ANNZ01007041-1_5182	T	A;G	.	A/A	.	.	.	T/T	T/T	.	T/T	T/T	.	T/T	G/G	G/G	.	T/A	.	.	.	T/T	T/T	T/A	G/G	T/T	G/G	.	.	.	.	G/G	.	T/T	T/T	T/T	G/G	.	.	.	.	.	.	T/T	.	T/T	.
Pv03	5893845	ANNZ01007062-1_4042	G	A	.	A/A	.	A/A	A/A	G/G	G/G	A/A	G/G	G/G	G/G	G/G	G/G	G/G	A/A	A/A	A/A	A/A	A/A	G/G	G/G	G/G	G/G	G/G	G/G	.	A/A	A/A	A/A	G/G	A/A	G/G	G/G	G/G	G/G	A/A	A/A	.	.	A/A	A/A	G/G	A/A	G/G	A/A
Pv03	6476319	ANNZ01007091-1_3339	C	T	.	C/C	C/C	C/C	T/T	C/C	C/C	T/T	C/C	C/C	C/C	C/C	C/C	C/C	C/C	C/C	T/T	C/C	C/C	C/C	C/C	C/C	C/C	C/C	C/C	C/C	C/C	C/C	C/C	C/C	C/C	C/C	C/C	C/C	C/C	C/C	C/C	.	.	C/C	C/C	C/C	C/C	C/C	C/C
Pv03	6545664	ANNZ01007093-1_4137	C	T	.	C/C	.	T/T	T/T	C/C	C/C	T/T	C/C	C/C	C/C	C/C	C/C	C/C	T/T	T/T	T/T	T/T	T/T	C/C	C/C	C/C	C/C	C/C	C/C	.	T/T	T/T	T/T	C/C	C/C	C/C	C/C	C/C	C/C	T/T	T/T	.	.	T/T	T/T	C/C	C/C	C/C	C/T
Pv03	6681257	ANNZ01007095-1_44524	G	.	.	.	.	.	.	G/G	G/G	.	G/G	G/G	G/G	G/G	G/G	G/G	.	.	.	.	.	G/G	G/G	G/G	G/G	G/G	G/G	.	.	.	.	G/G	.	G/G	G/G	G/G	G/G	.	.	.	.	.	.	G/G	.	G/G	.
Pv03	7054558	ANNZ01007111-1_65652	C	T	.	T/T	C/C	C/C	C/C	C/C	C/C	C/C	C/C	C/C	C/C	C/C	C/C	C/C	C/C	C/C	C/C	C/C	C/C	C/C	C/C	C/C	C/C	C/C	C/C	C/C	C/C	C/C	C/C	C/C	T/T	C/C	C/C	C/C	C/C	T/T	C/C	C/C	C/C	C/C	C/C	C/C	T/T	C/C	T/T
Pv03	7589168	ANNZ01007169-1_1516	C	T	.	C/C	.	.	.	C/C	T/T	.	C/T	C/T	T/T	T/T	C/C	C/C	.	.	.	C/C	C/C	C/C	C/C	T/T	.	C/C	C/C	.	.	.	.	T/T	C/C	C/C	C/C	T/T	C/C	.	.	.	.	.	.	C/C	C/C	C/C	.
Pv03	7748410	ANNZ01007188-1_12500	T	G	.	G/G	G/G	T/T	T/T	T/T	T/T	T/T	T/T	T/T	T/T	T/T	T/T	T/T	T/T	T/T	T/T	G/G	G/G	T/T	T/T	T/T	T/T	T/T	T/T	G/G	T/T	T/T	T/T	T/T	G/G	T/T	T/T	T/T	T/T	G/G	T/T	G/G	G/G	T/T	T/T	T/T	G/G	T/T	G/G
Pv03	7951989	ANNZ01007203-1_10069	C	T	.	C/C	.	T/T	T/T	C/C	C/C	T/T	C/C	C/C	C/C	C/C	C/C	C/C	T/T	T/T	T/T	C/C	C/C	C/C	C/C	C/C	C/C	C/C	C/C	.	T/T	T/T	T/T	C/C	T/T	C/C	C/C	C/C	C/C	C/C	T/T	.	.	T/T	T/T	C/C	T/T	C/C	C/C
Pv03	8518261	ANNZ01007225-1_11598	T	C	.	C/C	.	T/T	T/T	T/T	T/T	T/T	T/T	T/T	T/T	T/T	T/T	T/T	T/T	T/T	T/T	C/C	C/C	T/T	T/T	T/T	T/T	T/T	T/T	.	T/T	T/T	T/T	T/T	T/T	T/T	T/T	T/T	T/T	T/T	T/T	.	.	T/T	T/T	T/T	T/T	T/T	T/T
Pv03	8787369	ANNZ01007241-1_16450	G	A	.	A/A	.	A/A	A/A	G/G	G/G	A/A	G/G	G/G	G/G	G/G	G/G	G/G	A/A	A/A	A/A	G/G	G/G	G/G	G/G	G/G	G/G	G/G	G/G	.	A/A	A/A	A/A	G/G	A/A	G/G	G/G	G/G	G/G	A/A	A/A	.	.	A/A	A/A	G/G	A/A	G/G	A/A
Pv03	8832638	ANNZ01007248-1_11934	C	T	.	C/T	.	.	C/T	C/C	C/C	.	C/C	C/C	C/C	C/C	C/C	C/C	C/T	.	.	.	.	C/C	C/C	C/C	C/C	C/C	C/C	.	T/T	.	C/T	C/C	.	C/C	C/C	C/C	C/C	C/T	.	.	.	T/T	.	C/C	C/T	C/C	.
Pv03	9276612	ANNZ01007260-1_48847	C	.	.	.	.	.	.	C/C	C/C	.	C/C	C/C	C/C	C/C	C/C	C/C	.	.	.	.	.	C/C	C/C	C/C	C/C	C/C	C/C	.	.	.	.	C/C	.	C/C	C/C	C/C	C/C	.	.	.	.	.	.	C/C	.	C/C	.
Pv03	9392895	ANNZ01007274-1_56793	G	A	.	A/A	.	G/G	G/G	G/G	G/G	G/G	G/G	G/G	G/G	G/G	G/G	G/G	G/G	G/G	G/G	G/G	G/G	G/G	G/G	G/G	G/G	G/G	G/G	G/A	G/G	G/G	G/G	G/G	A/A	G/G	G/G	G/G	G/G	G/G	G/G	.	.	G/G	G/G	G/G	A/A	G/G	G/G
Pv03	9506925	ANNZ01007277-1_21309	T	G	.	G/G	G/G	G/G	G/G	T/T	T/T	G/G	T/T	T/T	T/T	T/T	T/T	T/T	G/G	G/G	G/G	G/G	G/G	T/T	T/T	T/T	T/T	T/T	T/T	G/G	G/G	G/G	G/G	T/T	G/G	T/T	T/T	T/T	T/T	G/G	G/G	G/G	G/G	G/G	G/G	T/T	G/G	T/T	G/G
Pv03	9651443	ANNZ01007285-1_13197	T	G	.	G/G	T/T	T/T	T/T	T/T	T/T	T/T	T/T	T/T	T/T	T/T	T/T	T/T	T/T	T/T	T/T	G/G	G/G	T/T	T/T	T/T	T/T	T/T	T/T	T/T	T/T	T/T	T/T	T/T	G/G	T/T	T/T	T/T	T/T	T/T	T/T	T/T	T/T	T/T	T/T	T/T	G/G	T/T	T/T
Pv03	9890190	ANNZ01007297-1_31171	C	T	.	.	C/C	C/C	C/C	C/C	.	C/C	C/C	C/C	C/C	C/C	C/C	C/C	C/C	C/C	C/C	.	.	C/C	C/C	C/C	C/C	C/C	C/C	C/C	C/C	C/C	C/C	C/C	.	C/C	C/C	C/C	C/C	C/C	C/C	C/C	.	C/C	C/C	C/C	.	C/C	C/C
Pv03	9947472	ANNZ01007299-1_15356	T	G	.	G/G	T/G	G/G	G/G	T/T	T/T	G/G	T/T	T/T	T/T	T/T	T/T	T/T	G/G	G/G	G/G	G/G	G/G	T/T	T/T	T/T	T/T	T/T	T/T	.	G/G	G/G	G/G	T/T	G/G	T/T	T/T	T/T	T/T	G/G	G/G	.	.	G/G	G/G	T/T	G/G	T/T	G/G
Pv03	10092713	ANNZ01007306-1_13145	G	A	.	A/A	.	A/A	A/A	G/G	G/G	A/A	G/G	G/G	G/G	G/G	G/G	G/G	A/A	A/A	A/A	A/A	A/A	G/G	G/G	G/G	G/G	G/G	G/G	G/A	A/A	A/A	A/A	G/G	A/A	G/G	G/G	G/G	G/G	A/A	A/A	.	.	A/A	A/A	G/G	A/A	G/G	A/A
Pv03	10160968	ANNZ01007311-1_2079	C	A	.	A/A	.	C/C	C/C	C/C	C/C	C/C	C/C	C/C	C/C	C/C	C/C	C/C	C/C	C/C	C/C	A/A	A/A	C/C	C/C	C/C	C/C	C/C	C/C	C/C	C/C	C/C	C/C	C/C	A/A	C/C	C/C	C/C	C/C	C/C	C/C	.	.	C/C	C/C	C/C	A/A	C/C	C/C
Pv03	10265676	ANNZ01007314-1_3434	G	A	.	G/G	.	G/G	A/A	G/G	G/G	A/A	G/G	G/G	G/G	G/G	G/G	G/G	A/A	G/G	A/A	G/G	G/G	G/G	G/G	G/G	G/G	G/G	G/G	.	A/A	G/A	G/G	G/G	G/G	G/G	G/G	G/G	G/G	A/A	A/A	.	.	G/G	G/G	G/G	G/G	G/G	A/A
Pv03	10388662	ANNZ01007322-1_696	C	T	.	T/T	.	T/T	C/C	C/C	C/C	C/C	C/C	C/C	C/C	C/C	C/C	C/C	C/C	T/T	C/C	T/T	T/T	C/C	C/C	C/C	C/C	C/C	C/C	.	C/C	C/T	T/T	C/C	T/T	C/C	C/C	C/C	C/C	C/C	C/C	.	.	T/T	T/T	C/C	T/T	C/C	C/C
Pv03	10494746	ANNZ01007328-1_1493	G	A	.	G/G	.	G/G	A/A	G/G	G/G	A/A	G/G	G/G	G/G	G/G	G/G	G/G	A/A	G/G	A/A	G/G	G/G	G/G	G/G	G/G	G/G	G/G	G/G	.	A/A	G/A	G/G	G/G	G/G	G/G	G/G	G/G	G/G	A/A	A/A	.	.	G/G	G/G	G/G	G/G	G/G	A/A
Pv03	10559521	ANNZ01007334-1_2248	G	A	.	A/A	.	A/A	G/G	G/G	G/G	G/G	G/G	G/G	G/G	G/G	G/G	G/G	G/G	A/A	G/G	A/A	G/A	G/G	G/G	G/G	G/G	G/G	G/G	.	G/G	G/A	A/A	G/G	A/A	G/G	G/G	G/G	G/G	G/G	G/G	.	.	A/A	A/A	G/G	A/A	G/G	G/G
Pv03	10603957	ANNZ01007340-1_14297	T	G	.	G/G	T/T	G/G	T/T	T/T	T/T	T/T	T/T	T/T	T/T	T/T	T/T	T/T	T/T	G/G	T/T	G/G	G/G	T/T	T/T	T/T	T/T	T/T	T/T	T/T	T/T	T/G	G/G	T/T	G/G	T/T	T/T	T/T	T/T	T/T	T/T	T/T	T/T	G/G	G/G	T/T	G/G	T/T	T/T
Pv03	10780679	ANNZ01007348-1_67768	C	T	.	T/T	C/C	T/T	C/C	C/C	C/C	C/C	C/C	C/C	C/C	C/C	C/C	C/C	C/C	T/T	C/C	T/T	T/T	C/C	C/C	C/C	C/C	C/C	C/C	C/C	C/C	C/T	T/T	C/C	T/T	C/C	C/C	C/C	C/C	C/C	C/C	C/C	C/C	T/T	T/T	C/C	T/T	C/C	C/C
Pv03	10870753	ANNZ01007350-1_38065	C	T	.	T/T	.	T/T	C/C	C/C	C/C	C/C	C/C	C/C	C/C	C/C	C/C	C/C	C/C	T/T	C/C	T/T	T/T	C/C	C/C	C/C	C/C	C/C	C/C	.	C/C	C/T	T/T	C/C	T/T	C/C	C/C	C/C	C/C	C/C	C/C	.	.	T/T	T/T	C/C	T/T	C/C	C/C
Pv03	10966595	ANNZ01007360-1_6642	G	A	.	G/G	.	G/G	A/A	G/G	G/G	A/A	G/G	G/G	G/G	G/G	G/G	G/G	G/G	G/G	A/A	G/G	G/G	G/G	G/G	G/G	G/G	G/G	G/G	.	G/G	G/A	G/G	G/G	G/G	G/G	G/G	G/G	G/G	A/A	A/A	.	.	G/G	G/G	G/G	G/G	G/G	A/A
Pv03	11070174	ANNZ01007360-1_110221	G	A	.	A/A	G/G	A/A	G/G	G/G	G/G	G/G	G/G	G/G	G/G	G/G	G/G	G/G	G/G	A/A	G/G	A/A	A/A	G/G	G/G	G/G	G/G	G/G	G/G	G/G	G/G	G/A	A/A	G/G	A/A	G/G	G/G	G/G	G/G	G/G	G/G	G/G	G/G	A/A	A/A	G/G	A/A	G/G	G/G
Pv03	11255572	ANNZ01007370-1_23164	A	G	.	G/G	.	G/G	.	A/A	A/A	.	A/A	A/A	A/A	A/A	A/A	A/A	.	G/G	.	G/G	G/G	A/A	A/A	A/A	A/A	A/A	A/A	.	.	G/G	G/G	A/A	G/G	A/A	A/A	A/A	A/A	.	.	.	.	G/G	G/G	A/A	G/G	A/A	.
Pv03	11365758	ANNZ01007370-1_133350	G	A	.	A/A	.	A/A	G/G	G/G	G/G	G/G	G/G	G/G	G/G	G/G	G/G	G/G	G/G	A/A	G/G	A/A	A/A	G/G	G/G	G/G	G/G	G/G	G/G	.	G/G	G/A	A/A	G/G	A/A	G/G	G/G	G/G	G/G	G/G	G/G	.	.	A/A	A/A	G/G	A/A	G/G	G/G
Pv03	11479403	ANNZ01007374-1_7771	C	T	.	T/T	.	T/T	C/C	C/C	C/C	C/C	C/C	C/C	C/C	C/C	C/C	C/C	C/C	T/T	C/C	T/T	T/T	C/C	C/C	C/C	C/C	C/C	C/C	.	C/C	C/T	T/T	C/C	T/T	C/C	C/C	C/C	C/C	C/C	C/C	.	.	T/T	T/T	C/C	T/T	C/C	C/C
Pv03	11574473	ANNZ01007376-1_83838	T	G	.	G/G	T/T	G/G	T/T	T/T	T/T	T/T	T/T	T/T	T/T	T/T	T/T	T/T	T/T	G/G	T/T	G/G	G/G	T/T	T/T	T/T	T/T	T/T	T/T	T/T	T/T	T/G	G/G	T/T	G/G	T/T	T/T	T/T	T/T	T/T	T/T	T/T	T/T	G/G	G/G	T/T	G/G	T/T	T/T
Pv03	11698186	ANNZ01007376-1_207551	T	G	.	T/T	.	T/T	G/G	T/T	T/T	G/G	T/T	T/T	T/T	T/T	T/T	T/T	G/G	T/T	G/G	T/T	T/T	T/T	T/T	T/T	T/T	T/T	T/T	.	G/G	T/G	T/T	T/T	T/T	T/T	T/T	T/T	T/T	G/G	G/G	.	.	T/T	T/T	T/T	T/T	T/T	G/G
Pv03	11788524	ANNZ01007381-1_17628	C	T	.	C/C	.	C/C	T/T	C/C	C/C	T/T	C/C	C/C	C/C	C/C	C/C	C/C	T/T	C/C	T/T	C/C	C/C	C/C	C/C	C/C	C/C	C/C	C/C	C/T	T/T	C/T	C/C	C/C	C/C	C/C	C/C	C/C	C/C	T/T	T/T	.	.	C/C	C/C	C/C	C/C	C/C	T/T
Pv03	11867243	ANNZ01007384-1_21463	T	G	.	G/G	T/T	G/G	T/T	T/T	T/T	T/T	T/T	T/T	T/T	T/T	T/T	T/T	T/T	G/G	T/T	G/G	G/G	T/T	T/T	T/T	T/T	T/T	T/T	T/T	T/T	T/G	G/G	T/T	G/G	T/T	T/T	T/T	T/T	T/T	T/T	T/T	T/T	G/G	G/G	T/T	G/G	T/T	T/T
Pv03	12085055	ANNZ01007398-1_32478	C	T	.	T/T	.	C/C	C/C	C/C	C/C	C/C	C/C	C/C	C/C	C/C	C/C	C/C	C/C	C/C	C/C	T/T	T/T	C/C	C/C	C/C	C/C	C/C	C/C	.	C/C	C/C	C/C	C/C	T/T	C/C	C/C	C/C	C/C	C/C	C/C	.	.	C/C	C/C	C/C	T/T	C/C	C/C
Pv03	12198383	ANNZ01007401-1_32409	T	C	.	C/C	.	T/T	T/T	T/T	T/T	T/T	T/T	T/T	T/T	T/T	T/T	T/T	T/T	T/T	T/T	C/C	C/C	T/T	T/T	T/T	T/T	T/T	T/T	.	T/T	T/T	T/T	T/T	C/C	T/T	T/T	T/T	T/T	T/T	T/T	.	.	T/T	T/T	T/T	C/C	T/T	T/T
Pv03	12225509	ANNZ01007401-1_59535	G	A	.	A/A	.	G/G	G/G	G/G	G/G	G/G	G/G	G/G	G/G	G/G	G/G	G/G	G/G	G/G	G/G	A/A	A/A	G/G	G/G	G/G	G/G	G/G	G/G	.	G/G	G/G	G/G	G/G	A/A	G/G	G/G	G/G	G/G	G/G	G/G	.	.	G/G	G/G	G/G	A/A	G/G	G/G
Pv03	12394984	ANNZ01007403-1_151538	C	A	.	A/A	.	C/C	C/C	C/C	C/C	C/C	C/C	C/C	C/C	C/C	C/C	C/C	C/C	C/C	C/C	A/A	A/A	C/C	C/C	C/C	C/C	C/C	C/C	.	C/C	C/C	C/C	C/C	A/A	C/C	C/C	C/C	C/C	C/C	C/C	.	.	C/C	C/C	C/C	A/A	C/C	C/C
Pv03	12483803	ANNZ01007410-1_5430	C	T	.	T/T	.	C/C	C/C	C/C	C/C	C/C	C/C	C/C	C/C	C/C	C/C	C/C	C/C	C/C	C/C	T/T	T/T	C/C	C/C	C/C	C/C	C/C	C/C	.	C/C	C/C	C/C	C/C	T/T	C/C	C/C	C/C	C/C	C/C	C/C	.	.	C/C	C/C	C/C	T/T	C/C	C/C
Pv03	12589547	ANNZ01007417-1_1632	C	T	.	T/T	T/T	C/C	C/C	C/C	C/C	C/C	C/C	C/C	C/C	C/C	C/C	C/C	C/C	C/C	C/C	T/T	T/T	C/C	C/C	C/C	C/C	C/C	C/C	T/T	C/C	C/C	C/C	C/C	T/T	C/C	C/C	C/C	C/C	C/C	C/C	T/T	T/T	C/C	C/C	C/C	T/T	C/C	C/C
Pv03	12667875	ANNZ01007418-1_57582	T	C	.	C/C	.	.	T/T	T/T	.	T/T	T/T	T/T	.	.	T/T	T/T	T/T	T/T	T/T	.	.	T/T	T/T	T/T	.	.	T/T	.	T/T	T/T	T/T	T/T	C/C	T/T	.	.	.	.	.	.	.	T/T	.	.	C/C	T/T	T/T
Pv03	12790910	ANNZ01007438-1_5401	A	G	.	G/G	A/A	A/A	A/A	A/A	A/A	A/A	A/A	A/A	A/A	A/A	A/A	A/A	A/A	A/A	A/A	G/G	G/G	A/A	A/A	A/A	A/A	A/A	A/A	A/A	A/A	A/A	A/A	A/A	G/G	A/A	A/A	A/A	A/A	A/A	A/A	A/A	A/A	A/A	A/A	A/A	G/G	A/A	A/A
Pv03	12806237	ANNZ01007438-1_20728	A	G	.	G/G	.	A/A	A/A	A/A	A/A	A/A	A/A	A/A	A/A	A/A	A/A	A/A	A/A	A/A	A/A	G/G	G/G	A/A	A/A	A/A	.	A/A	A/A	.	A/A	A/A	A/A	A/A	G/G	A/A	A/A	.	.	.	A/A	.	.	A/A	.	A/A	G/G	A/A	A/A
Pv03	13222149	ANNZ01007475-1_96621	G	A	.	G/G	G/G	G/G	G/G	G/G	G/G	G/G	G/A	G/G	G/G	G/G	A/A	A/A	G/G	G/G	G/G	G/G	G/G	G/G	G/G	G/G	A/A	G/G	A/A	G/G	G/G	G/G	G/G	G/G	G/G	G/G	G/G	G/G	A/A	G/G	G/G	G/G	G/G	G/G	G/G	G/G	G/G	G/G	G/G
Pv03	14900463	ANNZ01007631-1_2812	G	A	.	G/G	.	G/G	G/G	G/G	G/G	G/G	G/G	G/G	G/G	G/G	G/G	G/G	G/G	G/G	G/G	G/G	G/G	G/G	G/G	G/G	G/G	G/G	G/G	.	G/G	G/G	G/G	G/G	G/G	G/G	G/G	G/G	G/G	G/G	G/G	.	.	G/G	G/G	G/G	G/G	G/G	G/G
Pv03	15714108	ANNZ01007773-1_19595	G	A	.	G/G	G/G	G/G	G/G	G/G	G/G	G/G	G/A	G/G	G/G	G/G	A/A	A/A	G/G	G/G	G/G	G/G	G/G	G/G	G/G	G/G	A/A	G/G	A/A	G/G	G/G	G/G	G/G	G/G	G/G	G/G	G/G	G/G	A/A	G/G	G/G	G/G	G/G	G/G	G/G	G/G	G/G	G/G	G/G
Pv03	19496543	ANNZ01008317-1_41973	G	A	.	A/A	A/A	G/G	G/G	G/G	G/G	G/G	G/A	G/G	G/G	G/G	G/G	G/G	A/A	G/G	G/G	A/A	A/A	G/G	G/G	G/G	A/A	G/G	A/A	A/A	A/A	G/G	G/G	G/G	A/A	G/G	G/G	G/G	G/G	A/A	G/G	A/A	A/A	G/G	G/G	G/G	A/A	G/G	G/G
Pv03	25241153	ANNZ01009056-1_13103	A	G	.	G/G	.	G/G	G/G	A/A	A/A	A/G	A/A	A/A	A/A	A/A	A/A	A/A	G/G	G/G	G/G	G/G	G/G	A/A	A/A	A/A	A/A	A/A	A/A	.	G/G	G/G	G/G	A/A	G/G	A/A	A/A	A/A	A/A	A/A	G/G	.	.	G/G	G/G	A/A	G/G	A/A	A/A
Pv03	28823413	ANNZ01009305-1_23871	A	C;G	.	G/G	.	G/G	G/G	A/A	A/A	G/G	A/A	C/G	A/A	G/G	A/A	A/A	G/G	G/G	G/G	G/G	G/G	A/A	A/A	A/A	A/A	A/A	A/A	.	G/G	G/G	G/G	G/G	G/G	A/A	A/A	A/A	A/A	G/G	G/G	.	.	G/G	G/G	A/A	G/G	A/A	G/G
Pv03	29082249	ANNZ01009318-1_28832	C	T	.	C/C	.	C/C	C/C	C/C	T/T	C/C	C/T	C/C	T/T	C/C	T/T	T/T	C/C	C/C	C/C	C/C	C/C	C/C	C/T	T/T	T/T	C/C	T/T	.	C/C	C/C	C/C	C/C	C/C	C/C	C/C	C/C	T/T	C/C	C/C	.	.	C/C	C/C	C/C	C/C	T/T	C/C
Pv03	30207822	ANNZ01009372-1_25096	C	T	.	C/C	.	.	C/C	C/C	C/C	C/C	C/C	C/C	C/C	C/C	C/C	C/C	C/C	C/C	C/C	C/C	C/C	C/C	C/C	C/C	C/C	C/C	C/C	.	C/C	C/C	C/C	C/C	C/C	C/C	C/C	C/C	C/C	.	.	.	.	.	.	C/C	C/C	C/C	C/T
Pv03	32787342	ANNZ01009524-1_17171	G	A	.	G/G	.	G/G	G/G	G/G	G/G	G/G	G/G	G/A	G/G	G/G	G/G	G/G	A/A	G/G	G/G	G/G	G/G	A/A	G/A	G/G	G/G	G/G	G/G	.	G/G	G/G	G/G	G/G	G/G	A/A	G/G	G/G	G/G	G/G	G/G	.	.	G/G	G/G	G/G	G/G	G/G	G/G
Pv03	33557340	ANNZ01009570-1_49296	G	A	.	G/G	G/G	A/A	G/G	G/G	G/G	G/G	G/G	G/A	G/G	G/G	G/G	G/G	A/A	A/A	G/G	G/G	G/G	A/A	G/A	G/G	G/G	G/G	G/G	G/G	G/G	A/A	A/A	G/G	G/G	A/A	G/G	G/G	G/G	G/G	G/G	G/G	G/G	A/A	A/A	G/G	G/G	G/G	G/G
Pv03	37740818	ANNZ01009844-1_2087	G	A	.	G/G	.	.	.	.	.	.	.	G/G	G/G	.	A/A	G/G	A/A	A/A	A/A	.	.	.	.	G/G	.	.	.	.	.	A/A	.	.	G/G	G/G	.	.	.	.	.	.	.	.	.	.	.	.	.
Pv03	38268688	ANNZ01009868-1_38903	G	A	.	G/G	G/G	G/G	A/A	G/G	G/G	A/A	G/G	G/G	G/G	G/G	A/A	G/G	A/A	G/G	A/A	G/G	G/G	G/G	G/G	G/G	G/G	G/G	G/G	G/G	A/A	G/G	G/G	G/G	A/A	G/G	G/G	G/G	G/G	G/G	A/A	G/G	G/G	G/A	G/G	G/G	A/A	G/G	G/G
Pv03	38799836	ANNZ01009887-1_22215	G	A	.	G/G	G/G	A/A	A/A	G/G	G/G	A/A	G/G	G/G	G/G	G/G	G/G	G/G	G/G	A/A	A/A	G/G	G/G	G/G	G/G	G/G	G/G	G/G	G/G	G/G	A/A	A/A	A/A	G/G	G/G	G/G	G/G	G/G	G/G	G/G	G/G	G/G	G/G	A/A	A/A	G/G	G/G	G/G	G/G
Pv03	39239084	ANNZ01009901-1_57299	A	G	.	A/A	A/A	A/A	A/A	A/A	A/A	A/A	A/G	A/G	A/A	A/A	A/A	A/A	G/G	A/A	A/A	G/G	G/G	G/G	A/G	A/A	A/A	A/A	A/A	A/A	A/A	A/A	A/A	A/A	A/A	G/G	A/A	A/A	A/A	A/A	A/A	A/A	A/A	A/A	A/A	A/A	A/A	A/A	G/G
Pv03	39489330	ANNZ01009911-1_35807	A	G	.	G/G	.	A/A	A/A	A/A	A/A	A/A	A/G	A/G	A/A	A/A	A/A	A/A	G/G	A/A	A/A	G/G	G/G	G/G	A/G	A/A	A/A	A/A	A/A	.	G/G	A/A	G/G	A/A	G/G	G/G	A/A	A/A	A/A	A/A	G/G	.	.	A/A	G/G	A/A	G/G	A/A	G/G
Pv03	39662191	ANNZ01009921-1_22340	T	C	.	T/T	T/T	T/T	T/T	T/T	T/T	T/T	T/C	T/C	T/T	T/T	T/T	T/T	T/T	T/T	T/T	T/T	T/T	C/C	T/C	T/T	T/T	T/T	T/T	T/T	C/C	T/T	T/T	T/T	T/T	C/C	T/T	T/T	T/T	T/T	T/T	T/T	T/T	T/T	T/T	T/T	T/T	T/T	T/T
Pv03	40296194	ANNZ01009943-1_29962	G	A	.	G/G	.	G/G	G/G	G/G	A/A	G/G	G/A	G/G	G/G	G/G	G/G	G/G	G/G	G/G	G/G	G/G	G/G	G/G	G/G	G/G	G/G	G/G	G/G	.	G/G	G/G	G/G	A/A	G/G	G/G	G/G	G/G	A/A	G/G	G/G	G/G	.	G/G	G/G	G/G	G/G	G/G	G/G
Pv03	40428786	ANNZ01009952-1_30928	A	G	.	A/A	.	A/A	A/A	A/A	G/G	A/A	A/G	A/A	A/A	A/A	A/A	A/A	A/A	A/A	A/A	A/A	A/A	A/A	A/A	A/A	.	A/A	A/A	.	A/A	A/A	A/A	A/A	A/A	A/A	A/A	A/A	G/G	A/A	A/A	.	.	A/A	A/A	A/A	A/A	A/A	A/A
Pv03	41099271	ANNZ01009978-1_46706	C	T	.	C/C	.	C/C	C/C	C/C	C/C	C/C	C/C	C/C	C/C	C/C	C/C	C/C	C/C	C/C	C/C	C/C	C/C	C/C	C/C	C/C	C/C	C/C	C/C	.	C/C	C/C	C/C	C/C	C/C	C/C	C/C	C/C	T/T	C/C	C/C	.	.	C/C	C/C	C/C	C/C	C/C	C/C
Pv03	41293671	ANNZ01009994-1_18908	C	A	.	C/C	C/C	C/C	C/C	C/C	C/C	C/C	C/C	C/C	C/C	C/C	C/C	C/C	C/C	C/C	C/C	C/C	C/C	C/C	C/C	C/C	C/C	C/C	C/C	C/C	C/C	C/C	C/C	C/C	C/C	C/C	C/C	C/C	A/A	C/C	C/C	C/C	C/C	C/C	C/C	C/C	C/C	C/C	C/C
Pv03	42472363	ANNZ01010058-1_14340	T	C	.	T/T	.	T/T	T/T	T/T	C/C	T/T	T/C	T/T	T/T	T/T	T/T	T/T	T/T	T/T	T/T	T/T	T/T	T/T	T/T	T/T	T/T	T/T	T/T	.	T/T	T/T	T/T	T/T	T/T	T/T	T/T	T/T	C/C	T/T	T/T	.	T/T	T/T	T/T	T/T	T/T	T/T	T/T
Pv03	42704383	ANNZ01010063-1_61741	A	G	.	G/G	.	G/G	G/G	A/A	A/A	G/G	A/A	.	.	A/A	A/A	.	G/G	G/G	G/G	G/G	G/G	A/A	A/A	.	G/G	A/A	.	.	G/G	G/G	G/G	A/A	G/G	A/A	A/A	G/G	A/A	G/G	G/G	.	.	G/G	G/G	.	G/G	.	A/A
Pv03	42803164	ANNZ01010071-1_7588	T	C	.	C/C	.	C/C	C/C	T/T	T/T	C/C	T/T	T/C	C/C	T/T	T/T	C/C	C/C	C/C	C/C	C/C	C/C	T/T	T/T	C/C	C/C	T/T	C/C	.	C/C	C/C	C/C	T/T	C/C	T/T	T/T	T/T	T/T	T/T	C/C	.	.	C/C	C/C	C/C	C/C	C/C	T/T
Pv03	43177636	ANNZ01010085-1_29452	T	C	.	C/C	C/C	C/C	C/C	C/C	T/T	C/C	T/C	T/C	C/C	T/T	T/T	C/C	C/C	C/C	C/C	C/C	C/C	C/C	T/C	C/C	C/C	T/T	C/C	C/C	C/C	C/C	C/C	C/C	C/C	C/C	T/T	C/C	T/T	C/C	C/C	C/C	C/C	C/C	C/C	T/T	C/C	C/C	T/T
Pv03	43205704	ANNZ01010088-1_7530	T	C	.	C/C	C/C	C/C	C/C	T/T	T/T	C/C	T/C	T/C	C/C	C/C	C/C	C/C	C/C	C/C	C/C	C/C	C/C	C/C	C/C	C/C	C/C	C/C	C/C	C/C	C/C	C/C	C/C	C/C	C/C	C/C	C/C	C/C	T/T	C/C	C/C	C/C	C/C	C/C	C/C	C/C	C/C	C/C	C/C
Pv03	43979370	ANNZ01010122-1_44459	C	T	.	C/C	.	C/C	C/C	C/C	T/T	C/C	T/T	C/C	C/C	C/C	C/C	C/C	C/C	C/C	C/C	C/C	C/C	.	C/C	C/C	C/C	C/C	C/C	.	C/C	C/C	C/C	C/C	C/C	.	C/C	C/C	T/T	C/C	C/C	.	.	C/C	C/C	C/C	C/C	C/C	C/C
Pv03	45577423	ANNZ01010179-1_3653	C	T	.	T/T	.	T/T	T/T	C/C	C/C	T/T	C/C	C/C	C/C	C/C	C/C	C/C	T/T	T/T	T/T	T/T	T/T	T/T	C/T	C/C	C/C	C/C	C/C	.	T/T	T/T	T/T	C/C	T/T	T/T	C/C	C/C	C/C	T/T	T/T	.	.	T/T	T/T	C/C	T/T	T/T	C/C
Pv03	46054732	ANNZ01010201-1_15858	G	A	.	A/A	.	A/A	A/A	G/G	G/G	A/A	G/G	G/G	G/G	G/G	G/G	G/G	A/A	A/A	A/A	A/A	A/A	G/G	G/G	G/G	G/G	G/G	G/G	.	A/A	A/A	A/A	G/G	A/A	G/G	G/G	G/G	G/G	A/A	A/A	.	.	A/A	A/A	G/G	A/A	A/A	G/G
Pv03	50004506	ANNZ01010379-1_94078	A	G	.	A/A	A/A	A/A	A/A	A/A	A/A	A/A	A/G	A/G	A/A	A/A	A/A	A/A	G/G	A/A	A/A	G/G	G/G	A/A	A/A	A/A	G/G	A/A	A/A	A/A	G/G	A/A	A/A	A/A	A/A	A/A	A/A	A/A	A/A	A/A	A/A	A/A	A/A	A/A	A/A	G/G	A/A	A/A	A/A
Pv03	50120699	ANNZ01010381-1_81553	G	A	.	A/A	G/G	G/G	G/G	G/G	G/G	G/G	G/A	A/A	G/G	G/G	G/G	G/G	G/G	G/G	G/G	A/A	A/A	G/G	G/G	G/G	G/G	G/G	G/G	G/G	A/A	G/G	G/G	G/G	G/G	G/G	G/G	G/G	G/G	G/G	G/G	G/G	G/G	G/G	G/G	G/G	G/G	G/G	G/G
Pv03	51734449	ANNZ01010424-1_47677	G	T	.	G/G	G/G	G/G	G/G	G/G	G/G	G/G	G/G	G/T	G/G	G/G	G/G	G/G	G/G	G/G	G/G	T/T	T/T	G/G	G/G	G/G	T/T	G/G	G/G	G/G	G/G	G/G	G/G	G/G	G/G	G/G	G/G	G/G	G/G	G/G	G/G	G/G	G/G	G/G	G/G	T/T	G/G	G/G	G/G
Pv04	90666	ANNZ01010432-1_7231	C	A	.	C/C	C/C	C/C	C/C	A/A	C/C	C/C	A/A	C/A	C/C	C/C	C/C	C/C	C/C	C/C	C/C	C/C	C/C	C/C	C/A	A/A	A/A	A/A	C/C	C/C	A/A	C/C	C/C	C/C	C/C	C/C	A/A	A/A	C/C	C/C	C/C	C/C	C/C	C/C	C/C	A/A	C/C	A/A	A/A
Pv04	96165	ANNZ01010432-1_12730	G	A	.	G/G	A/A	G/G	G/G	A/A	G/G	G/G	A/A	A/A	A/A	G/G	G/G	G/G	G/G	G/G	G/G	A/A	A/A	A/A	G/A	A/A	A/A	A/A	G/G	A/A	A/A	G/G	G/G	A/A	G/G	A/A	A/A	A/A	G/G	G/G	G/G	A/A	A/A	G/G	G/G	A/A	G/G	A/A	A/A
Pv04	101676	ANNZ01010432-1_18241	C	A	.	C/C	C/C	C/C	C/C	A/A	C/C	C/C	A/A	C/A	C/C	C/C	C/C	C/C	C/C	C/C	C/C	C/C	C/C	C/C	C/A	A/A	A/A	A/A	C/C	C/C	A/A	C/C	C/C	C/C	C/C	C/C	A/A	A/A	C/C	C/C	C/C	C/C	C/C	C/C	C/C	A/A	C/C	A/A	A/A
Pv04	297698	ANNZ01010451-1_12673	G	A	.	G/G	.	.	G/G	G/G	G/G	G/G	G/A	G/G	.	G/G	G/G	G/G	G/G	G/G	G/G	.	.	G/G	G/G	G/G	G/G	G/G	G/G	.	.	G/G	G/G	G/G	G/G	G/G	G/G	G/G	G/G	G/G	.	.	.	G/G	G/G	G/G	G/G	G/G	A/A
Pv04	354682	ANNZ01010456-1_35065	C	T	.	C/C	.	.	C/C	C/C	C/C	C/C	T/T	C/T	T/T	C/C	C/C	C/C	T/T	T/T	C/C	C/C	C/C	T/T	C/T	T/T	C/T	T/T	T/T	.	T/T	.	C/C	T/T	T/T	T/T	T/T	T/T	C/C	.	T/T	.	.	C/T	C/C	T/T	T/T	T/T	T/T
Pv04	381360	ANNZ01010456-1_61743	A	G	.	A/A	A/A	A/A	A/A	A/A	A/A	A/A	G/G	A/G	A/A	A/A	A/A	A/A	A/A	A/A	A/A	A/A	A/A	G/G	A/G	G/G	G/G	G/G	A/A	A/A	G/G	A/A	A/A	A/A	A/A	G/G	G/G	G/G	A/A	A/A	A/A	A/A	A/A	A/A	A/A	G/G	A/A	G/G	G/G
Pv04	447225	ANNZ01010465-1_8205	A	C;G	.	A/A	A/G	G/G	A/A	A/A	G/G	A/A	A/A	A/A	A/A	G/G	A/A	G/G	G/G	G/G	A/A	A/A	A/A	A/A	A/G	A/A	A/A	A/A	G/G	C/G	A/A	G/G	A/A	G/G	G/G	A/A	A/A	A/A	A/A	G/G	G/G	.	C/G	G/G	A/A	A/A	G/G	A/A	A/A
Pv04	487659	ANNZ01010465-1_48639	T	G	.	T/T	.	G/G	T/T	T/T	G/G	T/T	T/T	T/T	T/T	G/G	T/T	G/G	G/G	G/G	T/T	T/T	T/T	T/T	T/G	T/T	T/T	T/T	G/G	.	T/T	G/G	T/T	G/G	G/G	T/T	T/T	T/T	T/T	G/G	G/G	.	.	G/G	T/T	T/T	G/G	T/T	T/T
Pv04	575066	ANNZ01010466-1_76187	C	T	.	T/T	T/T	C/C	T/T	T/T	C/C	T/T	C/C	C/C	C/C	C/C	T/T	C/C	C/C	C/C	T/T	T/T	T/T	C/C	C/C	C/C	C/C	C/C	C/C	T/T	T/T	C/C	T/T	C/C	C/C	C/C	C/C	C/C	T/T	C/C	T/T	T/T	T/T	C/C	T/T	C/C	C/C	C/C	C/C
Pv04	593836	ANNZ01010466-1_95017	G	A	.	A/A	.	G/G	A/A	A/A	G/G	A/A	A/A	G/A	A/A	G/G	A/A	G/G	G/G	G/G	A/A	A/A	A/A	A/A	G/A	G/G	A/A	A/A	A/A	.	A/A	G/G	A/A	A/A	G/G	A/A	A/A	A/A	A/A	A/A	A/A	.	.	G/G	A/A	A/A	G/G	A/A	A/A
Pv04	607533	ANNZ01010466-1_108714	G	A	.	G/G	G/G	G/G	G/G	G/G	G/G	G/G	G/G	G/G	G/G	G/G	G/G	G/G	G/G	G/G	G/G	G/G	G/G	G/G	G/G	G/G	G/G	G/G	G/G	G/G	G/G	G/G	G/G	G/G	G/G	G/G	G/G	G/G	A/A	G/G	G/G	G/G	G/G	G/G	G/G	G/G	G/G	G/G	G/G
Pv04	1099511	ANNZ01010548-1_19249	T	C	.	.	.	T/T	.	.	.	.	.	T/T	C/C	.	T/T	C/C	.	T/T	.	.	.	.	.	.	.	.	.	.	.	T/T	.	.	T/T	.	.	.	.	.	.	.	.	T/T	.	.	T/T	.	.
Pv04	1165722	ANNZ01010549-1_43866	C	T	.	C/C	.	C/C	C/C	C/C	T/T	C/C	C/C	C/C	C/C	T/T	C/C	T/T	C/C	C/C	C/C	C/C	C/C	C/C	C/C	T/T	C/C	C/C	C/C	.	C/C	C/C	C/C	C/C	C/C	C/C	C/C	C/C	C/C	C/C	C/C	.	.	C/C	C/C	C/C	C/C	C/C	C/C
Pv04	1178006	ANNZ01010549-1_56150	G	A	.	.	A/A	G/G	A/A	G/G	A/A	A/A	.	G/G	.	A/A	G/G	A/A	.	G/G	A/A	G/G	G/G	.	.	A/A	.	.	G/G	.	G/G	G/G	G/A	G/G	G/G	.	.	.	G/G	G/G	G/G	.	A/A	G/G	A/A	.	G/G	.	.
Pv04	1284794	ANNZ01010552-1_39693	G	A	.	G/G	.	G/G	G/G	G/G	A/A	G/G	G/G	G/G	G/G	A/A	G/G	A/A	G/G	G/G	G/G	G/G	G/G	G/G	G/G	G/G	G/G	G/G	G/G	.	G/G	G/G	G/G	G/G	G/G	G/G	G/G	G/G	G/G	G/G	.	.	.	G/G	G/G	G/G	G/G	G/G	G/G
Pv04	1433996	ANNZ01010559-1_29697	G	A	.	A/A	.	A/A	A/A	A/A	A/A	A/A	G/G	G/A	A/A	A/A	A/A	A/A	A/A	A/A	A/A	A/A	A/A	G/G	G/G	G/G	G/G	G/G	A/A	G/G	A/A	A/A	A/A	A/A	A/A	G/G	G/G	G/G	A/A	A/A	A/A	.	.	A/A	A/A	G/G	A/A	G/G	G/G
Pv04	1497419	ANNZ01010562-1_582	A	C	.	C/C	C/C	C/C	C/C	C/C	C/C	C/C	A/A	A/C	C/C	C/C	C/C	C/C	C/C	C/C	C/C	C/C	C/C	A/A	A/A	A/A	A/A	A/A	C/C	A/C	C/C	C/C	C/C	C/C	C/C	A/A	A/A	A/A	C/C	C/C	C/C	C/C	C/C	C/C	C/C	A/A	C/C	A/A	A/A
Pv04	1543869	ANNZ01010566-1_5026	A	C	.	C/C	.	A/A	A/A	A/A	C/C	A/A	A/A	A/A	C/C	C/C	.	C/C	A/A	A/A	A/A	.	.	A/A	A/A	A/A	A/A	A/A	C/C	.	C/C	A/A	A/A	A/A	A/A	A/A	A/A	A/A	A/A	.	A/A	.	.	A/A	A/A	A/A	A/A	A/A	A/A
Pv04	1627690	ANNZ01010570-1_59585	T	C	.	T/T	.	C/C	C/C	T/T	T/T	T/C	T/T	T/T	T/C	T/T	T/T	T/T	T/T	C/C	C/C	T/T	T/T	T/T	T/T	T/T	T/T	T/T	T/T	.	T/T	T/C	C/C	T/T	T/C	T/T	T/T	T/T	C/C	T/C	T/T	.	.	C/C	.	T/T	C/C	T/T	T/T
Pv04	1728453	ANNZ01010587-1_3986	G	T	.	T/T	T/T	G/G	T/T	G/G	T/T	T/T	G/G	G/G	G/G	T/T	T/T	T/T	T/T	G/G	T/T	T/T	T/T	G/G	G/G	G/G	G/G	G/G	T/T	.	G/G	G/G	T/T	G/G	G/G	G/G	G/G	G/G	T/T	T/T	G/G	T/T	T/T	G/G	T/T	G/G	G/G	G/G	G/G
Pv04	1745263	ANNZ01010587-1_20796	T	G	.	T/T	T/T	T/T	T/T	T/T	T/T	T/T	T/T	T/T	T/T	T/T	T/T	T/T	T/T	T/T	T/T	T/T	T/T	T/T	T/T	T/T	T/T	T/T	T/T	T/T	T/T	T/T	T/T	T/T	T/T	T/T	T/T	T/T	G/G	T/T	T/T	T/T	T/T	T/T	T/T	T/T	T/T	T/T	T/T
Pv04	1898893	ANNZ01010592-1_99431	A	C	.	A/A	.	C/C	C/C	A/A	C/C	C/C	C/C	C/C	A/A	C/C	C/C	C/C	C/C	C/C	C/C	C/C	C/C	C/C	C/C	A/A	C/C	C/C	C/C	.	C/C	C/C	C/C	A/A	C/C	C/C	C/C	C/C	A/A	C/C	C/C	.	.	C/C	C/C	C/C	C/C	C/C	C/C
Pv04	1982297	ANNZ01010593-1_42850	C	T	.	C/C	.	C/C	C/C	C/C	C/C	C/C	C/T	C/C	C/C	C/C	.	C/C	C/C	C/C	C/C	C/C	C/C	C/C	C/T	C/C	T/T	C/C	C/C	.	C/C	C/C	C/C	C/C	C/C	C/C	C/C	C/C	C/C	C/C	C/C	.	.	C/C	C/C	C/C	C/C	C/C	T/T
Pv04	2072060	ANNZ01010595-1_24316	T	C	.	C/C	T/T	C/C	C/C	T/T	C/C	C/C	T/C	T/C	C/C	C/C	C/C	C/C	C/C	C/C	C/C	C/C	C/C	T/T	T/T	T/T	T/T	T/T	C/C	T/T	C/C	C/C	C/C	T/T	C/C	T/T	T/T	T/T	C/C	C/C	C/C	T/T	T/T	C/C	C/C	T/T	C/C	T/T	T/T
Pv04	2192408	ANNZ01010605-1_30157	T	C	.	T/T	.	T/C	T/C	T/T	T/T	T/C	T/C	T/C	T/C	T/C	T/T	T/T	T/T	T/C	T/C	T/T	T/T	T/T	T/T	T/T	T/T	T/T	T/C	.	T/C	T/C	T/C	T/T	T/C	T/T	T/T	T/T	T/T	T/C	T/C	.	.	T/C	T/C	T/T	T/C	T/T	T/T
Pv04	2294146	ANNZ01010608-1_38908	A	G	.	G/G	G/G	A/A	A/A	A/A	G/G	A/A	A/A	A/A	A/A	A/A	A/A	G/G	G/G	A/A	A/A	A/A	A/A	A/A	A/A	A/A	A/A	A/A	A/A	A/A	A/A	A/A	A/A	A/A	A/A	A/A	A/A	A/A	G/G	A/A	A/A	A/G	A/A	A/A	A/A	A/A	A/A	A/A	A/A
Pv04	2389964	ANNZ01010613-1_54190	A	G	.	G/G	.	A/A	A/A	A/A	G/G	A/A	A/A	A/A	A/A	A/A	A/A	A/A	A/A	A/A	A/A	A/A	A/A	A/A	A/A	A/A	A/A	A/A	A/A	.	A/A	A/A	A/A	A/A	A/A	A/A	A/A	A/A	G/G	A/A	A/A	.	.	A/A	A/A	A/A	A/A	A/A	A/A
Pv04	2483880	ANNZ01010616-1_63903	T	C	.	T/T	T/T	T/T	T/T	T/T	C/C	T/T	T/T	T/T	T/T	T/T	T/T	T/T	T/T	T/T	T/T	C/C	C/C	T/T	T/T	T/T	T/T	T/T	T/T	T/T	T/T	T/T	T/T	T/T	T/T	T/T	T/T	T/T	C/C	T/T	T/T	T/T	T/T	T/T	T/T	T/T	T/T	T/T	T/T
Pv04	2596653	ANNZ01010619-1_14545	A	G	.	G/G	.	A/A	A/A	A/A	G/G	A/A	A/G	A/A	A/A	A/A	A/A	A/A	A/A	A/A	A/A	G/G	G/G	A/A	A/A	A/A	A/A	A/A	G/G	.	G/G	A/A	A/A	A/A	A/A	A/A	A/A	A/A	G/G	G/G	A/A	.	.	A/A	A/A	A/A	A/A	A/A	A/A
Pv04	2676473	ANNZ01010621-1_18163	G	A	.	A/A	A/A	A/A	A/A	G/G	G/G	A/A	G/A	G/A	G/G	G/G	G/G	G/G	A/A	A/A	A/A	A/A	A/A	G/G	G/G	G/G	G/G	G/G	A/A	A/A	A/A	A/A	A/A	G/G	A/A	G/G	G/G	G/G	A/A	A/A	A/A	A/A	A/A	A/A	A/A	G/G	A/A	G/G	G/G
Pv04	2798776	ANNZ01010623-1_62687	A	G	.	G/G	.	G/G	G/G	A/A	A/A	G/G	A/G	A/G	A/A	A/A	A/A	A/A	G/G	G/G	G/G	G/G	G/G	A/A	A/A	A/A	A/A	A/A	G/G	G/G	G/G	G/G	G/G	A/A	G/G	A/A	A/A	A/A	G/G	G/G	G/G	.	.	G/G	G/G	A/A	G/G	A/A	A/A
Pv04	2894249	ANNZ01010627-1_34861	C	A	.	A/A	.	A/A	A/A	C/C	C/C	A/A	C/A	C/A	C/C	C/C	C/C	C/C	A/A	A/A	A/A	A/A	A/A	C/C	C/C	C/C	C/C	C/C	A/A	C/A	C/C	A/A	A/A	C/C	A/A	C/C	C/C	C/C	A/A	A/A	A/A	.	.	A/A	A/A	C/C	A/A	C/C	C/C
Pv04	2981879	ANNZ01010629-1_31880	T	C	.	C/C	T/T	C/C	C/C	T/T	T/T	C/C	T/C	T/C	T/T	T/T	T/T	T/T	C/C	C/C	C/C	C/C	C/C	T/T	T/T	T/T	T/T	T/T	C/C	T/T	T/T	C/C	C/C	T/T	C/C	T/T	T/T	T/T	C/C	C/C	C/C	T/T	T/T	C/C	C/C	T/T	C/C	T/T	T/T
Pv04	5083694	ANNZ01010790-1_62732	A	G	.	A/A	.	G/G	G/G	A/A	A/A	G/G	A/A	A/G	A/A	A/A	A/A	A/A	G/G	G/G	G/G	G/G	G/G	G/G	A/A	A/A	A/A	A/A	A/A	.	G/G	G/G	G/G	A/A	G/G	A/A	A/A	A/A	A/A	A/A	G/G	.	.	G/G	G/G	A/A	G/G	G/G	A/A
Pv04	5109527	ANNZ01010790-1_88565	C	A	.	C/C	.	.	C/C	C/C	C/C	.	C/C	C/C	C/C	C/C	C/C	C/C	C/C	.	.	A/A	A/A	.	C/C	C/C	C/C	C/C	C/C	.	C/C	.	.	C/C	C/C	C/C	C/C	C/C	C/C	C/C	C/C	.	.	.	.	C/C	C/C	.	C/C
Pv04	5400710	ANNZ01010814-1_29285	G	A	.	A/A	G/G	G/G	G/G	G/G	G/G	G/G	G/G	G/G	G/G	G/G	G/G	G/G	G/G	G/G	G/G	A/A	A/A	A/A	G/G	G/G	G/G	G/G	G/G	G/G	G/G	G/G	G/G	G/G	G/G	G/G	G/G	G/G	G/G	G/G	G/G	G/G	G/G	G/G	G/G	G/G	G/G	A/A	G/G
Pv04	7965745	ANNZ01010957-1_4196	C	A	.	C/C	.	A/A	C/C	A/A	C/C	C/C	C/A	A/A	C/C	C/C	A/A	C/C	C/C	A/A	C/C	C/C	C/C	A/A	A/A	C/C	C/C	C/C	A/A	.	C/C	C/C	A/A	C/C	C/C	A/A	A/A	A/A	C/C	C/C	C/C	.	.	A/A	A/A	A/A	C/C	A/A	C/C
Pv04	41643720	ANNZ01014218-1_76266	A	G	.	A/A	G/G	G/G	G/G	A/A	A/A	G/G	A/G	A/G	A/A	A/A	A/A	A/A	A/A	G/G	G/G	A/A	G/G	G/G	A/G	A/A	A/A	A/A	A/A	G/G	A/A	G/G	G/G	A/A	G/G	G/G	G/G	A/A	A/A	A/A	G/G	G/G	G/G	G/G	G/G	A/A	G/G	G/G	A/A
Pv04	41795672	ANNZ01014229-1_56228	A	C	.	C/C	C/C	A/A	A/A	A/A	C/C	A/A	C/C	C/C	A/A	A/A	A/A	C/C	C/C	A/A	A/A	C/C	C/C	C/C	C/C	A/A	A/A	A/A	C/C	C/C	C/C	A/A	A/A	A/A	A/A	C/C	C/C	A/A	C/C	A/A	A/A	C/C	C/C	C/C	A/A	C/C	A/A	C/C	C/C
Pv04	41814509	ANNZ01014229-1_75065	A	G	.	A/A	G/G	G/G	G/G	G/G	A/A	G/G	A/A	A/A	G/G	G/G	G/G	A/A	A/A	G/G	G/G	A/A	A/A	A/A	A/A	G/G	G/G	G/G	A/A	A/G	A/A	G/G	G/G	G/G	G/G	A/A	A/A	A/A	A/A	A/A	G/G	G/G	G/G	G/G	G/G	A/A	G/G	A/A	A/A
Pv04	42076428	ANNZ01014239-1_15202	T	G	.	G/G	.	T/T	T/T	G/G	G/G	T/T	G/G	G/G	G/G	G/G	G/G	G/G	T/T	T/T	T/T	G/G	G/G	G/G	G/G	G/G	G/G	G/G	G/G	.	T/T	T/T	T/T	G/G	T/T	G/G	G/G	T/T	G/G	T/T	T/T	.	.	G/G	T/T	G/G	T/T	G/G	G/G
Pv04	42310722	ANNZ01014252-1_23091	A	G	.	G/G	G/G	G/G	G/G	A/A	A/A	G/G	A/G	G/G	A/A	A/A	A/A	A/A	G/G	G/G	G/G	G/G	G/G	G/G	A/G	A/A	A/A	A/A	A/A	G/G	G/G	G/G	G/G	A/A	G/G	G/G	A/A	A/A	A/A	A/A	G/G	G/G	G/G	A/A	G/G	A/A	G/G	G/G	A/A
Pv04	42523245	ANNZ01014260-1_10622	C	T	.	C/T	.	T/T	T/T	C/C	C/C	C/C	C/C	C/C	C/C	C/C	C/C	C/C	T/T	T/T	C/C	T/T	T/T	C/C	C/T	C/C	C/C	C/C	C/C	.	T/T	T/T	T/T	C/C	T/T	C/C	C/C	C/C	C/C	C/C	T/T	.	.	C/C	T/T	C/C	T/T	C/C	C/C
Pv04	42567534	ANNZ01014261-1_1743	A	C	.	C/C	A/A	C/C	C/C	A/A	A/A	A/A	A/C	C/C	A/A	A/A	A/A	A/A	C/C	C/C	A/A	C/C	C/C	C/C	A/C	A/A	A/A	A/A	A/A	A/A	C/C	C/C	C/C	A/A	C/C	C/C	A/A	A/A	A/A	A/A	C/C	A/A	A/A	A/A	C/C	A/A	C/C	C/C	A/A
Pv04	42616895	ANNZ01014266-1_4693	G	A	.	G/G	.	A/A	A/A	G/G	G/G	G/G	G/G	G/G	G/G	G/G	G/G	G/G	.	A/A	G/G	G/G	G/G	G/G	G/G	G/G	G/G	G/G	G/G	.	.	A/A	G/G	G/G	G/G	G/G	G/G	G/G	G/G	G/G	A/A	.	.	.	G/G	G/G	G/G	G/G	G/G
Pv04	42755888	ANNZ01014274-1_8988	T	G	.	T/T	T/T	G/G	G/G	T/T	T/T	T/T	T/T	T/G	T/T	T/T	T/T	T/T	G/G	G/G	T/T	T/T	G/G	T/T	T/T	T/T	T/T	T/T	T/T	T/T	G/G	G/G	G/G	T/T	G/G	T/T	T/T	T/T	T/T	T/T	G/G	T/T	T/T	T/T	G/G	T/T	G/G	T/T	T/T
Pv04	43050988	ANNZ01014287-1_83715	C	T	.	T/T	C/C	C/C	C/C	C/C	C/C	C/C	C/T	C/T	C/C	C/C	C/C	C/C	T/T	C/C	C/C	T/T	C/C	T/T	C/C	C/C	C/C	C/C	C/C	C/C	T/T	C/C	C/C	C/C	C/C	T/T	C/C	C/C	C/C	C/C	C/C	C/C	C/C	C/C	C/C	C/C	C/C	T/T	C/C
Pv04	43121211	ANNZ01014287-1_153938	G	T	.	T/T	T/T	G/G	G/G	G/G	G/G	G/G	G/T	G/T	G/G	T/T	T/T	G/G	T/T	G/G	G/G	T/T	G/G	T/T	G/T	T/T	G/G	T/T	G/G	T/T	T/T	G/G	G/G	G/G	G/G	T/T	T/T	G/G	G/G	G/G	G/G	T/T	T/T	G/G	G/G	G/G	G/G	T/T	G/G
Pv04	43347824	ANNZ01014296-1_6026	T	C	.	C/C	T/T	C/C	C/C	T/T	T/T	T/T	T/C	C/C	T/T	T/T	T/T	T/T	T/T	C/C	T/T	C/C	T/T	C/C	T/T	T/T	C/C	T/T	T/T	T/T	T/T	C/C	C/C	T/T	T/T	C/C	T/T	T/T	T/T	T/T	C/C	T/T	T/T	C/C	C/C	T/T	T/T	C/C	T/T
Pv04	43497706	ANNZ01014299-1_17740	A	G	.	A/A	A/A	A/A	A/A	G/G	A/A	G/G	A/A	A/A	A/A	A/A	A/A	A/A	G/G	A/A	G/G	A/A	A/A	A/A	A/A	A/A	A/A	A/A	A/A	A/A	G/G	A/A	A/A	A/A	G/G	A/A	A/A	G/G	A/A	A/A	A/A	A/A	A/A	A/A	A/A	A/A	G/G	A/A	A/A
Pv04	43591210	ANNZ01014307-1_19903	A	G	.	A/A	A/A	A/A	A/A	A/A	A/A	G/G	A/A	A/A	A/A	A/A	A/A	A/A	A/A	A/A	G/G	A/A	A/A	A/A	A/A	A/A	A/A	A/A	A/A	A/A	A/A	A/A	A/A	A/A	A/A	A/A	A/A	A/A	A/A	A/A	A/A	A/A	A/A	A/A	A/A	A/A	A/A	A/A	A/A
Pv04	43868165	ANNZ01014323-1_16259	G	A	.	A/A	G/G	G/G	G/G	G/G	G/G	G/G	A/A	G/A	G/G	G/G	G/G	G/G	A/A	G/G	G/G	A/A	A/A	A/A	G/A	G/G	A/A	G/G	A/A	G/G	A/A	G/G	G/G	G/G	A/A	A/A	G/G	G/G	G/G	A/A	G/G	G/G	G/G	G/G	G/G	G/G	A/A	A/A	G/G
Pv04	44447991	ANNZ01014346-1_46866	T	C	.	T/T	T/C	C/C	C/C	T/T	T/T	C/C	T/C	C/C	T/T	T/T	T/T	T/T	C/C	C/C	C/C	T/T	T/T	C/C	T/C	T/T	C/C	T/T	T/T	C/C	C/C	C/C	C/C	T/T	T/T	C/C	T/T	T/T	T/T	T/T	C/C	T/T	C/C	C/C	C/C	T/T	T/T	C/C	T/T
Pv04	44740001	ANNZ01014353-1_42804	C	A;T	.	A/A	T/T	A/A	A/A	A/A	C/C	A/A	C/A	C/A	C/C	C/C	C/C	C/C	A/A	A/A	A/A	A/A	C/C	A/A	C/C	C/C	A/A	C/C	C/C	T/T	A/A	A/A	A/A	C/C	A/A	A/A	C/C	C/C	C/C	C/C	A/A	T/T	T/T	C/A	A/A	C/C	A/A	A/A	C/C
Pv04	44892910	ANNZ01014361-1_2469	C	T	.	C/C	.	T/T	T/T	T/T	C/C	T/T	C/T	C/T	C/C	C/C	C/C	C/C	T/T	T/T	T/T	C/C	C/C	T/T	C/C	C/C	T/T	C/C	T/T	C/T	T/T	T/T	T/T	C/C	C/C	T/T	C/C	C/C	C/C	C/C	T/T	C/T	.	C/C	T/T	C/C	C/C	T/T	C/C
Pv04	45017192	ANNZ01014375-1_5887	G	A	.	G/G	.	G/G	G/G	G/G	G/A	G/G	G/A	G/A	G/G	G/G	G/A	G/A	G/G	G/G	G/G	G/G	G/G	G/A	G/A	G/G	G/G	G/G	G/A	.	G/G	G/G	G/G	G/G	G/G	G/A	G/A	G/G	G/G	G/A	G/G	.	.	G/G	G/G	G/G	G/G	G/A	G/A
Pv04	45076430	ANNZ01014376-1_55598	T	C	.	C/C	C/C	T/T	T/T	T/T	T/T	T/T	T/T	T/T	T/T	T/T	T/T	T/T	T/T	T/T	T/T	C/C	T/T	T/T	T/T	T/T	T/T	T/T	T/T	C/C	T/T	T/T	T/T	T/T	T/T	T/T	T/T	T/T	T/T	T/T	T/T	C/C	C/C	C/C	T/T	T/T	T/T	T/T	T/T
Pv04	45361108	ANNZ01014381-1_39137	T	C	.	C/C	T/T	C/C	C/C	T/T	T/T	T/T	T/T	T/C	T/T	T/T	T/T	T/T	C/C	C/C	C/C	C/C	C/C	T/T	T/T	T/T	C/C	T/T	C/C	T/T	C/C	C/C	C/C	T/T	C/C	T/T	T/T	T/T	T/T	T/T	C/C	T/T	T/T	T/T	C/C	T/T	C/C	T/T	T/T
Pv04	45453583	ANNZ01014381-1_131612	C	T	.	C/C	.	C/C	C/C	C/C	C/C	T/T	C/C	C/C	C/C	C/C	C/C	C/C	T/T	C/C	T/T	C/C	C/C	C/C	C/C	C/C	T/T	C/C	T/T	C/C	C/C	C/C	T/T	C/C	C/C	C/C	C/C	C/C	C/C	C/C	T/T	.	.	.	T/T	C/C	C/C	C/C	C/C
Pv05	189562	ANNZ01014412-1_20863	C	A	.	A/A	.	A/A	C/C	C/C	C/C	C/C	C/C	C/C	C/C	C/C	C/C	C/C	A/A	A/A	C/C	A/A	A/A	C/C	C/C	C/C	C/C	C/C	C/C	C/A	A/A	A/A	A/A	C/C	A/A	C/C	A/A	C/C	C/C	C/C	A/A	.	.	A/A	A/A	C/C	A/A	A/A	C/C
Pv05	285830	ANNZ01014414-1_25149	C	T	.	C/C	C/C	C/C	T/T	C/C	C/C	C/C	C/C	C/C	C/C	C/C	C/C	C/C	C/C	C/C	.	C/C	C/C	C/C	C/C	C/C	C/C	C/C	C/C	C/C	.	C/C	C/T	C/C	.	C/C	C/C	C/C	C/C	C/C	C/C	C/C	C/C	C/C	.	C/C	.	C/C	C/C
Pv05	344200	ANNZ01014416-1_35092	T	C	.	C/C	T/T	C/C	T/T	T/T	T/T	C/C	T/T	T/T	T/T	T/T	T/T	T/T	C/C	C/C	T/T	C/C	C/C	T/T	T/T	T/T	T/T	T/T	T/T	T/T	T/T	C/C	T/T	T/T	T/T	T/T	C/C	T/T	T/T	T/T	C/C	T/T	T/T	C/C	T/T	T/T	T/T	C/C	T/T
Pv05	453717	ANNZ01014421-1_1473	T	C	.	C/C	C/C	C/C	T/T	T/T	T/T	C/C	T/T	T/T	T/T	T/T	T/T	T/T	T/T	C/C	T/T	C/C	C/C	T/T	T/T	T/T	T/T	T/T	T/T	C/C	C/C	C/C	T/T	T/T	T/T	T/T	C/C	T/T	T/T	T/T	C/C	C/C	C/C	C/C	T/T	T/T	T/T	T/T	T/T
Pv05	577906	ANNZ01014424-1_78731	C	T	.	C/C	C/C	C/C	T/T	C/C	C/C	C/C	C/C	C/C	C/C	C/C	C/C	C/C	C/C	C/C	T/T	C/C	C/C	C/C	C/C	C/C	C/C	C/C	C/C	C/C	T/T	C/C	C/C	C/C	C/C	C/C	C/C	C/C	C/C	C/C	C/C	C/C	C/C	C/C	C/C	C/C	C/C	C/C	C/C
Pv05	996629	ANNZ01014452-1_8412	G	A	.	G/G	.	A/A	G/G	G/G	G/G	A/A	G/G	G/G	A/A	G/G	A/A	A/A	G/G	A/A	G/G	G/G	G/G	A/A	G/A	A/A	A/A	G/G	A/A	.	A/A	A/A	A/A	G/G	A/A	A/A	A/A	G/G	A/A	G/G	G/G	.	.	A/A	A/A	A/A	A/A	G/G	G/G
Pv05	1331792	ANNZ01014470-1_49246	G	A	.	A/A	G/G	G/G	A/A	G/G	G/G	G/G	G/G	G/G	G/G	G/G	G/G	G/G	G/G	G/G	A/A	A/A	A/A	G/G	G/G	G/G	G/G	G/G	G/G	G/G	G/G	G/G	G/G	G/G	G/G	G/G	G/G	G/G	G/G	G/G	A/A	G/G	G/G	G/G	G/G	G/G	G/G	G/G	G/G
Pv05	1488090	ANNZ01014477-1_13035	A	G	.	G/G	G/G	G/G	G/G	G/G	A/A	A/A	A/G	A/G	A/A	A/G	A/G	A/A	G/G	G/G	G/G	G/G	G/G	G/G	A/G	A/A	A/A	A/G	A/G	G/G	A/A	G/G	A/A	A/A	A/A	G/G	A/G	A/G	A/A	A/G	G/G	G/G	G/G	G/G	A/A	A/A	A/A	A/G	A/A
Pv05	1577552	ANNZ01014482-1_33689	C	T	.	C/C	.	C/C	C/C	C/C	C/C	T/T	C/C	C/C	T/T	C/C	T/T	C/C	C/C	C/C	C/C	C/C	C/C	C/C	C/C	T/T	C/C	C/C	C/C	.	T/T	C/C	T/T	C/C	T/T	C/C	T/T	C/C	C/C	C/C	C/C	.	.	C/C	T/T	C/C	T/T	C/C	C/C
Pv05	1608022	ANNZ01014482-1_64099	C	T	.	T/T	T/T	T/T	T/T	T/T	C/C	T/T	C/C	C/C	T/T	C/C	T/T	C/C	T/T	T/T	T/T	T/T	T/T	C/C	C/C	T/T	C/C	C/C	T/T	T/T	T/T	T/T	T/T	C/C	T/T	C/C	T/T	C/C	C/C	C/C	T/T	T/T	T/T	T/T	T/T	C/C	T/T	C/C	C/C
Pv05	1742788	ANNZ01014484-1_95704	A	G	.	A/A	G/G	G/G	A/A	A/A	G/G	G/G	G/G	G/G	G/G	G/G	G/G	G/G	A/A	G/G	A/A	A/A	A/A	G/G	G/G	G/G	G/G	G/G	A/A	G/G	G/G	G/G	G/G	G/G	G/G	G/G	G/G	G/G	G/G	G/G	A/A	G/G	G/G	G/G	G/G	G/G	G/G	G/G	A/A
Pv05	1880470	ANNZ01014486-1_22054	T	G	.	G/G	G/G	G/G	T/T	T/T	G/G	T/T	G/G	G/G	T/T	G/G	G/G	G/G	G/G	G/G	G/G	T/T	T/T	G/G	G/G	T/T	G/G	G/G	G/G	G/G	T/T	G/G	T/T	G/G	T/T	G/G	G/G	G/G	G/G	G/G	T/T	G/G	G/G	G/G	T/T	G/G	T/T	G/G	G/G
Pv05	1971349	ANNZ01014487-1_15504	A	C	.	A/A	A/A	C/C	A/A	A/A	.	C/C	A/A	A/A	C/C	A/A	A/A	A/A	C/C	C/C	C/C	A/A	A/A	A/A	A/A	C/C	A/A	A/A	A/A	.	A/A	C/C	C/C	A/A	C/C	A/A	A/A	A/A	A/A	A/A	A/A	A/A	.	C/C	C/C	A/A	C/C	A/A	A/A
Pv05	2501072	ANNZ01014509-1_5470	T	C	.	T/T	.	T/T	T/T	T/T	.	T/T	.	.	T/T	T/T	.	.	T/T	T/T	T/T	T/T	T/T	.	.	T/T	.	.	.	.	T/T	T/T	T/T	T/T	T/T	T/T	.	.	.	.	T/T	.	.	T/T	T/T	.	T/T	.	.
Pv05	2663417	ANNZ01014525-1_34153	C	.	.	C/C	.	C/C	C/C	C/C	C/C	C/C	C/C	C/C	C/C	C/C	C/C	C/C	C/C	C/C	C/C	C/C	C/C	C/C	C/C	C/C	C/C	C/C	C/C	.	C/C	C/C	C/C	C/C	C/C	C/C	C/C	C/C	C/C	C/C	C/C	.	.	C/C	C/C	C/C	C/C	C/C	C/C
Pv05	2784024	ANNZ01014528-1_13863	G	A	.	A/A	.	A/A	G/G	G/G	G/G	A/A	G/G	G/G	A/A	G/G	G/G	G/G	G/G	A/A	A/A	A/A	A/A	G/G	G/G	A/A	G/G	G/G	G/G	G/A	A/A	A/A	A/A	G/G	A/A	G/G	G/G	G/G	G/G	G/G	A/A	.	.	A/A	A/A	G/G	A/A	G/G	G/G
Pv05	2839644	ANNZ01014528-1_69483	T	C	.	C/C	T/T	T/T	C/C	T/T	T/T	C/C	T/T	T/T	C/C	T/T	T/T	T/T	C/C	T/T	T/T	C/C	C/C	T/T	T/T	C/C	T/T	T/T	T/T	T/T	C/C	T/T	C/C	T/T	C/C	T/T	T/T	T/T	T/T	T/T	C/C	T/T	T/T	T/T	C/C	T/T	C/C	T/T	T/T
Pv05	3101003	ANNZ01014542-1_5204	A	G	.	.	.	.	A/A	A/A	A/A	.	A/A	A/A	.	A/A	A/A	A/A	A/A	.	.	.	.	A/A	A/A	.	A/A	A/A	A/A	.	.	.	.	A/A	.	A/A	A/A	A/A	A/A	A/A	.	.	.	.	.	A/A	.	A/A	A/A
Pv05	3248617	ANNZ01014555-1_9387	G	A	.	G/G	.	A/A	G/G	G/G	G/G	A/A	G/G	G/G	G/G	G/G	G/G	G/G	G/G	A/A	G/G	G/G	G/G	G/G	G/G	G/G	G/G	G/G	G/G	.	A/A	A/A	G/G	G/G	G/G	G/G	G/G	G/G	G/G	G/G	G/G	.	.	A/A	G/G	G/G	G/G	G/G	G/G
Pv05	3458507	ANNZ01014566-1_13146	A	C;G	.	G/G	C/C	G/G	A/A	A/A	A/A	G/G	A/A	A/A	A/A	G/G	A/A	A/A	A/A	G/G	A/A	G/G	A/A	A/A	A/A	A/A	A/A	A/A	A/A	C/C	G/G	G/G	A/A	A/A	A/A	A/A	A/A	A/A	A/A	A/A	A/A	C/C	C/C	G/G	A/A	A/A	A/A	A/A	A/A
Pv05	3534543	ANNZ01014571-1_57475	T	C	.	C/C	.	C/C	T/T	T/T	T/T	C/C	T/T	T/T	T/T	C/C	T/T	T/T	T/T	C/C	T/T	C/C	C/C	T/T	T/T	T/T	T/T	T/T	T/T	.	C/C	C/C	T/T	T/T	T/T	T/T	T/T	T/T	T/T	T/T	T/T	.	.	C/C	T/T	T/T	T/T	T/T	T/T
Pv05	3818344	ANNZ01014595-1_2042	G	T	.	G/G	.	G/G	G/G	G/G	G/G	G/G	G/G	G/G	G/G	G/G	G/G	G/G	G/G	G/G	G/G	G/G	G/G	G/G	G/G	G/G	G/G	G/G	G/G	.	G/G	G/G	G/G	G/G	G/G	G/G	G/G	G/G	G/G	G/G	G/G	.	.	G/G	G/G	G/G	G/G	G/G	G/G
Pv05	3962033	ANNZ01014599-1_98740	A	G	.	.	.	G/G	G/G	.	.	G/G	A/A	A/G	.	.	A/A	A/A	.	G/G	G/G	.	.	.	.	A/A	.	.	.	.	.	G/G	G/G	.	G/G	A/A	.	.	.	.	.	.	.	G/G	.	.	G/G	.	.
Pv05	4298377	ANNZ01014630-1_8587	C	A	.	C/C	C/C	A/A	A/A	C/C	C/C	A/A	C/C	C/A	C/C	A/A	C/C	C/C	A/A	A/A	A/A	C/C	A/A	C/C	C/C	C/C	C/C	C/C	C/C	C/C	C/C	A/A	A/A	C/C	A/A	C/C	C/C	C/C	C/C	C/C	A/A	C/C	C/C	A/A	A/A	C/C	A/A	C/C	C/C
Pv05	4370420	ANNZ01014634-1_19030	G	A	.	A/A	A/A	A/A	G/G	G/G	G/G	A/A	G/G	G/A	G/G	G/G	G/G	G/G	A/A	A/A	A/A	G/G	A/A	G/G	G/G	G/G	G/G	G/G	G/G	A/A	A/A	A/A	A/A	G/G	A/A	G/G	G/G	G/G	G/G	G/G	G/G	A/A	A/A	A/A	A/A	G/G	A/A	G/G	G/G
Pv05	4491671	ANNZ01014637-1_22894	C	A	.	C/C	C/C	C/C	C/C	C/C	C/C	C/C	C/C	C/C	C/C	C/C	C/C	C/C	C/C	C/C	C/C	C/C	C/C	C/C	C/C	C/C	C/C	C/C	C/C	C/C	C/C	C/C	C/C	C/C	C/C	C/C	C/C	C/C	C/C	C/C	C/C	C/C	C/C	C/C	C/C	C/C	C/C	C/C	C/C
Pv05	4583012	ANNZ01014649-1_13073	G	A	.	G/G	.	.	G/G	G/G	.	.	G/G	G/G	G/G	G/G	G/G	G/G	.	.	.	G/G	G/G	G/G	G/G	G/G	G/G	G/G	G/G	.	.	.	.	G/G	.	G/G	G/G	G/G	G/G	G/G	.	.	.	.	.	G/G	.	G/G	G/G
Pv05	4662017	ANNZ01014657-1_33986	A	G	.	G/G	G/G	G/G	G/G	A/A	G/G	G/G	A/A	A/G	A/A	G/G	A/A	A/A	A/A	G/G	A/A	G/G	G/G	A/A	A/A	A/A	A/A	A/A	A/A	G/G	A/A	G/G	G/G	A/A	G/G	A/A	A/A	A/A	A/A	A/A	A/A	G/G	G/G	G/G	G/G	A/A	G/G	A/A	A/A
Pv05	4792428	ANNZ01014664-1_9470	C	T	.	C/C	.	T/T	.	C/C	T/T	T/T	C/C	C/T	C/C	.	C/C	C/C	T/T	T/T	T/T	C/C	T/T	C/C	C/C	C/C	C/C	C/C	C/C	.	T/T	T/T	T/T	C/C	T/T	C/C	C/C	C/C	C/C	T/T	T/T	.	.	T/T	T/T	C/C	T/T	C/C	C/C
Pv05	4898904	ANNZ01014671-1_37041	C	T	.	C/C	C/C	C/C	C/C	C/C	C/C	C/C	C/C	C/C	C/C	C/C	C/C	C/C	C/C	C/C	C/C	C/C	C/C	C/C	C/C	C/C	C/C	C/C	C/C	C/C	C/C	C/C	C/C	C/C	C/C	C/C	C/C	C/C	C/C	C/C	C/C	C/C	C/C	C/C	C/C	C/C	C/C	C/C	C/C
Pv05	4971397	ANNZ01014671-1_109534	T	C	.	C/C	.	T/T	C/C	C/C	C/C	C/C	T/T	T/T	T/T	C/C	T/T	T/T	C/C	T/T	C/C	C/C	C/C	T/T	T/T	T/T	T/T	T/T	T/T	.	C/C	T/T	T/C	T/T	T/C	T/T	T/T	T/T	T/T	C/C	C/C	.	.	T/C	.	T/T	T/C	T/T	T/T
Pv05	5087105	ANNZ01014683-1_16010	G	A	.	G/G	G/G	G/G	A/A	A/A	A/A	A/A	G/G	G/G	G/G	A/A	G/G	G/G	A/A	G/G	A/A	A/A	G/G	G/G	G/G	G/G	G/G	G/G	G/G	G/G	A/A	G/G	G/G	G/G	G/G	G/G	G/G	G/G	G/G	A/A	A/A	.	G/G	G/G	G/G	G/G	G/G	G/G	G/G
Pv05	5179743	ANNZ01014689-1_20121	C	A	.	A/A	C/C	C/C	A/A	A/A	A/A	A/A	C/C	C/C	C/C	A/A	C/C	C/C	A/A	C/C	A/A	A/A	.	C/C	C/C	C/C	C/C	C/C	C/C	C/C	A/A	C/C	C/C	C/C	C/C	C/C	C/C	C/C	C/C	A/A	A/A	C/C	C/C	C/C	C/C	C/C	C/C	C/C	C/C
Pv05	5240041	ANNZ01014691-1_14779	G	A	.	G/G	G/G	G/G	G/G	G/G	G/G	G/G	G/G	G/G	G/G	G/G	G/G	G/G	G/G	G/G	G/G	G/G	G/G	G/G	G/G	G/G	G/G	G/G	G/G	G/G	G/G	G/G	G/G	G/G	G/G	G/G	G/G	G/G	G/G	G/G	G/G	G/G	G/G	G/G	G/G	G/G	G/G	G/G	G/G
Pv05	5399253	ANNZ01014699-1_24359	C	A	.	A/A	.	A/A	A/A	A/A	A/A	A/A	C/C	C/C	C/C	A/A	C/C	C/C	A/A	A/A	A/A	C/C	.	C/C	C/C	C/C	C/C	C/C	C/C	.	A/A	A/A	C/C	C/C	C/C	C/C	C/C	C/C	C/C	A/A	A/A	.	.	A/A	C/C	C/C	C/C	C/C	C/C
Pv05	5492357	ANNZ01014705-1_12067	G	A	.	G/G	G/G	A/A	A/A	A/A	A/A	A/A	G/G	G/G	G/G	A/A	G/G	G/G	A/A	A/A	A/A	A/A	G/G	G/G	G/G	G/G	G/G	G/G	G/G	G/G	A/A	A/A	G/G	G/G	G/G	G/G	G/G	G/G	G/G	A/A	A/A	G/G	G/G	A/A	G/G	G/G	G/G	G/G	G/G
Pv05	5589934	ANNZ01014712-1_40435	T	C	.	C/C	.	C/C	C/C	C/C	C/C	C/C	T/T	T/C	T/T	C/C	T/T	T/T	C/C	C/C	C/C	C/C	.	T/T	T/T	T/T	T/T	T/T	T/T	.	C/C	C/C	C/C	T/T	C/C	T/T	T/T	T/T	T/T	C/C	C/C	.	.	C/C	C/C	T/T	C/C	T/T	T/T
Pv05	5676669	ANNZ01014714-1_15920	C	T	.	T/T	.	T/T	T/T	T/T	C/C	T/T	C/C	C/T	C/C	T/T	C/C	C/C	T/T	T/T	T/T	T/T	T/T	C/C	C/C	C/C	C/C	C/C	C/C	.	T/T	T/T	T/T	C/C	T/T	C/C	C/C	C/C	C/C	T/T	T/T	.	.	T/T	T/T	C/C	T/T	C/C	C/C
Pv05	5794988	ANNZ01014726-1_57965	T	C	.	T/T	.	T/T	T/T	T/T	T/T	T/T	T/T	T/T	T/T	T/T	T/T	T/T	T/T	T/T	T/T	T/T	T/T	T/T	T/T	T/T	T/T	T/T	T/T	.	T/T	T/T	T/T	T/T	T/T	T/T	T/T	T/T	T/T	T/T	T/T	.	.	T/T	T/T	T/T	T/T	T/T	T/T
Pv05	5831868	ANNZ01014727-1_32952	A	C	.	A/A	.	A/A	A/A	A/A	A/A	A/A	A/A	A/A	A/A	A/A	A/A	A/A	A/A	A/A	A/A	A/A	A/A	A/A	A/A	A/A	A/A	A/A	A/A	.	A/A	A/A	A/A	A/A	A/A	A/A	A/A	A/A	A/A	A/A	A/A	.	.	A/A	A/A	A/A	A/A	A/A	A/A
Pv05	6014871	ANNZ01014737-1_33085	G	A	.	G/G	G/G	A/A	G/G	G/G	G/G	A/A	G/G	G/G	G/G	G/G	G/G	G/G	A/A	A/A	A/A	G/G	G/G	G/G	G/G	G/G	G/G	G/G	G/G	G/G	G/G	A/A	G/G	G/G	G/G	G/G	G/G	G/G	G/G	A/A	A/A	G/G	G/G	G/A	G/G	G/G	G/G	G/G	G/G
Pv05	6129262	ANNZ01014743-1_95937	C	T	.	C/C	.	C/C	C/C	C/C	C/C	C/C	C/C	C/C	C/C	C/C	C/C	C/C	C/C	C/C	C/C	C/C	C/C	C/C	C/C	C/C	C/C	C/C	C/C	.	C/C	C/C	C/C	C/C	C/C	C/C	C/C	C/C	C/C	C/C	C/C	.	.	C/C	C/C	C/C	C/C	C/C	C/C
Pv05	6721865	ANNZ01014767-1_8749	G	A	.	A/A	.	A/A	G/G	G/G	G/G	A/A	G/G	G/G	G/G	G/G	G/G	G/G	A/A	A/A	A/A	G/G	G/G	G/G	G/G	G/G	G/G	G/G	G/G	.	G/G	A/A	G/G	G/G	G/G	G/G	G/G	G/G	G/G	A/A	A/A	.	.	G/A	G/G	G/G	G/G	G/G	G/G
Pv05	7176170	ANNZ01014785-1_55987	T	G	.	G/G	.	G/G	T/T	T/T	T/T	G/G	T/T	T/G	T/T	T/T	T/T	T/T	G/G	G/G	G/G	G/G	G/G	T/T	T/T	T/T	T/T	T/T	T/T	.	G/G	G/G	G/G	T/T	G/G	T/T	T/T	T/T	T/T	G/G	G/G	T/G	.	G/G	G/G	T/T	G/G	T/T	T/T
Pv05	7294451	ANNZ01014788-1_56730	T	C	.	C/C	T/T	T/T	C/C	T/T	T/T	C/C	T/T	T/T	T/T	C/C	T/T	T/T	T/T	T/T	C/C	T/T	T/T	T/T	T/T	T/T	T/T	T/T	T/T	T/T	T/T	T/T	T/T	T/T	T/T	T/T	T/T	T/T	T/T	T/T	T/T	T/T	T/T	T/T	T/T	T/T	T/T	T/T	T/T
Pv05	7301936	ANNZ01014788-1_64215	C	T	.	T/T	.	C/C	T/T	C/C	C/C	T/T	C/C	C/C	C/C	T/T	C/C	C/C	C/C	C/C	T/T	C/C	C/C	C/C	C/C	C/C	C/C	C/C	C/C	.	C/C	C/C	C/C	C/C	C/C	C/C	C/C	C/C	C/C	C/C	C/C	.	.	C/C	C/C	C/C	C/C	C/C	C/C
Pv05	7629419	ANNZ01014806-1_15694	G	A	.	G/G	.	G/G	G/G	G/G	G/G	A/A	G/G	G/G	G/G	G/G	G/G	G/G	G/G	G/G	A/A	G/G	G/G	G/G	G/G	G/G	G/G	G/G	G/G	.	G/G	G/G	G/G	G/G	G/G	G/G	G/G	G/G	G/G	G/G	G/G	.	.	G/G	G/G	G/G	G/G	G/G	G/G
Pv05	8378573	ANNZ01014850-1_7693	A	G	.	G/G	.	G/G	A/A	A/A	A/A	G/G	A/A	A/G	A/A	A/A	A/A	A/A	G/G	G/G	G/G	A/A	A/A	A/A	A/A	A/A	A/A	A/A	A/A	.	G/G	G/G	G/G	G/G	G/G	A/A	A/A	A/A	A/A	G/G	.	.	.	A/G	G/G	A/A	G/G	A/A	A/A
Pv05	9517622	ANNZ01014952-1_16346	G	A	.	G/G	.	G/G	G/G	G/G	G/G	A/A	G/G	G/A	G/G	G/G	G/G	G/G	A/A	G/G	A/A	G/G	G/G	G/G	G/G	G/G	G/G	G/G	G/G	G/A	A/A	G/G	A/A	A/A	A/A	G/G	G/G	G/G	G/G	A/A	G/G	.	.	G/G	A/A	G/G	A/A	G/G	G/G
Pv05	11364832	ANNZ01015107-1_3908	C	T	.	C/C	.	T/T	T/T	C/C	C/C	C/C	C/C	C/C	C/C	T/T	C/C	C/C	T/T	T/T	C/C	C/C	C/C	C/C	C/C	C/C	C/C	C/C	C/C	.	C/C	T/T	T/T	T/T	T/T	C/C	C/C	C/C	C/C	T/T	T/T	.	.	T/T	T/T	C/C	T/T	C/C	C/C
Pv05	24404441	ANNZ01016681-1_13705	A	G	.	A/A	A/A	G/G	A/A	A/A	A/A	G/G	A/A	A/G	A/A	A/A	A/A	A/A	G/G	G/G	G/G	A/A	A/A	A/A	A/A	A/A	A/A	A/A	A/A	A/A	G/G	G/G	G/G	A/A	G/G	A/A	A/A	A/A	A/A	G/G	G/G	A/A	A/A	A/G	G/G	A/A	G/G	A/A	A/A
Pv05	27277253	ANNZ01017115-1_14771	G	A	.	G/G	.	A/A	G/G	G/G	G/G	A/A	G/G	G/A	G/G	G/G	G/G	G/G	A/A	A/A	A/A	G/G	G/G	G/G	G/G	G/G	G/G	G/G	G/G	.	A/A	A/A	A/A	G/G	A/A	G/G	G/G	G/G	G/G	A/A	A/A	.	.	A/A	A/A	G/G	A/A	G/G	G/G
Pv05	27957447	ANNZ01017173-1_43270	T	C	.	T/T	.	C/C	T/T	T/T	T/T	C/C	T/T	T/C	T/T	T/T	T/T	T/T	C/C	C/C	C/C	T/T	T/T	T/T	T/T	T/T	T/T	T/T	T/T	T/C	C/C	C/C	C/C	T/T	C/C	T/T	T/T	T/T	T/T	C/C	C/C	.	.	C/C	C/C	T/T	C/C	T/T	T/T
Pv05	30434123	ANNZ01017434-1_10784	C	T	.	C/C	.	T/T	C/C	C/C	C/C	T/T	C/C	C/C	C/C	C/C	C/C	C/C	T/T	T/T	T/T	C/C	C/C	C/C	C/C	C/C	C/C	C/C	C/C	.	C/C	T/T	C/C	C/C	T/T	C/C	C/C	C/C	C/C	T/T	T/T	.	.	T/T	C/C	C/C	T/T	C/C	C/C
Pv05	31078939	ANNZ01017464-1_12202	T	C	.	T/T	.	C/C	T/T	T/T	T/T	C/C	T/T	T/C	T/T	T/T	T/T	T/T	C/C	C/C	C/C	T/T	T/T	T/T	T/T	T/T	T/T	T/T	T/T	.	C/C	C/C	C/C	T/T	C/C	T/T	T/T	T/T	T/T	T/T	C/C	.	.	C/C	C/C	T/T	C/C	T/T	T/T
Pv05	33024482	ANNZ01017590-1_75318	G	A	.	G/G	.	G/G	G/G	G/G	G/G	G/G	G/G	G/G	G/G	G/G	G/G	G/G	A/A	G/G	G/G	G/G	G/G	G/G	G/G	G/G	G/G	G/G	G/G	.	G/G	G/G	G/G	G/G	A/A	G/G	G/G	G/G	G/G	G/G	G/G	.	.	G/G	G/G	G/G	G/G	G/G	G/G
Pv05	34786720	ANNZ01017709-1_92699	G	T	.	T/T	G/G	T/T	T/T	G/G	G/G	T/T	G/G	G/G	T/T	G/G	G/G	G/G	T/T	T/T	T/T	T/T	T/T	G/G	G/G	G/G	G/G	G/G	G/G	G/G	G/G	T/T	T/T	G/G	T/T	G/G	G/G	G/G	G/G	G/G	T/T	G/G	G/G	G/T	T/T	G/G	T/T	G/G	G/G
Pv05	36614327	ANNZ01017803-1_61421	T	C	.	T/T	.	C/C	T/T	T/T	T/T	T/T	T/T	T/T	T/T	T/T	T/T	T/T	C/C	C/C	T/T	T/T	T/T	T/T	T/T	T/T	T/T	T/T	T/T	.	T/T	C/C	C/C	T/T	C/C	T/T	T/T	T/T	T/T	T/T	T/T	.	.	T/C	C/C	T/T	C/C	T/T	T/T
Pv05	37973686	ANNZ01017846-1_31662	T	C	.	C/C	C/C	C/C	C/C	T/T	T/T	C/C	T/T	T/C	C/C	T/C	T/T	T/T	C/C	C/C	C/C	C/C	C/C	T/T	T/T	T/T	T/T	T/T	T/T	C/C	C/C	C/C	C/C	C/C	C/C	T/T	T/T	T/T	C/C	T/T	C/C	C/C	C/C	C/C	C/C	T/T	C/C	T/T	T/T
Pv05	38045885	ANNZ01017846-1_103861	A	G	.	G/G	.	G/G	G/G	A/A	A/A	G/G	A/A	A/G	G/G	A/G	A/A	A/A	G/G	G/G	G/G	G/G	G/G	A/A	A/A	A/A	A/A	A/A	A/A	.	G/G	G/G	G/G	G/G	G/G	A/A	A/A	A/A	G/G	A/A	G/G	.	.	G/G	G/G	A/A	G/G	A/A	A/A
Pv05	38187733	ANNZ01017847-1_91918	A	G	.	G/G	G/G	G/G	G/G	A/A	A/A	G/G	A/A	A/G	G/G	A/G	A/A	A/A	G/G	G/G	G/G	G/G	G/G	A/A	A/A	A/A	A/A	A/A	A/A	G/G	G/G	G/G	G/G	G/G	G/G	A/A	A/A	A/A	G/G	A/A	G/G	G/G	G/G	G/G	G/G	A/A	G/G	A/A	A/A
Pv05	38222613	ANNZ01017849-1_25807	C	T	.	T/T	T/T	T/T	T/T	C/C	C/C	T/T	C/C	C/T	T/T	C/C	C/C	C/C	T/T	T/T	T/T	T/T	T/T	C/C	C/C	C/C	C/C	C/C	C/C	T/T	T/T	T/T	T/T	T/T	T/T	C/C	C/C	C/C	T/T	C/C	T/T	T/T	T/T	T/T	T/T	C/C	T/T	C/C	C/C
Pv05	38380694	ANNZ01017851-1_17265	G	A	.	.	G/G	G/G	G/G	G/G	.	G/G	G/G	G/G	.	G/G	G/G	.	G/G	G/G	G/G	G/G	G/G	.	G/G	.	.	G/G	.	G/G	G/G	G/G	G/G	G/G	G/G	.	G/G	G/G	G/G	.	G/G	G/G	G/G	G/G	G/G	G/G	G/G	G/G	G/G
Pv05	38484487	ANNZ01017853-1_15461	A	G	.	A/A	A/A	A/A	G/G	A/A	A/A	G/G	A/A	A/A	A/A	A/A	A/A	A/A	G/G	A/A	G/G	A/A	A/A	A/A	A/A	A/A	A/A	A/A	A/A	A/A	A/A	A/A	G/G	G/G	G/G	A/A	A/A	A/A	G/G	A/A	G/G	A/A	A/A	A/A	G/G	A/A	G/G	A/A	A/A
Pv05	38510663	ANNZ01017854-1_2741	T	C	.	C/C	C/C	C/C	C/C	T/T	T/T	C/C	T/T	T/C	T/T	T/T	T/T	T/T	C/C	C/C	C/C	C/C	C/C	T/T	T/T	T/T	T/T	T/T	T/T	C/C	C/C	C/C	C/C	C/C	C/C	T/T	T/T	T/T	C/C	T/T	C/C	C/C	C/C	C/C	C/C	T/T	C/C	T/T	T/T
Pv05	38652238	ANNZ01017856-1_34615	G	A	.	A/A	.	A/A	G/G	G/G	A/A	G/G	G/A	G/A	A/A	G/G	G/G	A/A	A/A	A/A	G/G	A/A	A/A	A/A	G/A	A/A	A/A	G/G	A/A	.	A/A	A/A	G/G	G/G	G/G	G/G	G/G	G/G	A/A	A/A	G/G	.	.	A/A	G/G	G/G	G/G	G/G	G/G
Pv05	38752855	ANNZ01017857-1_82052	C	A	.	C/C	A/A	C/C	C/C	C/C	A/A	C/C	C/A	C/C	A/A	C/C	C/C	A/A	C/C	C/C	C/C	C/C	C/C	A/A	C/C	C/C	C/C	C/C	A/A	A/A	C/C	C/C	C/C	C/C	C/C	C/C	C/C	C/C	C/C	A/A	C/C	A/A	A/A	C/C	C/C	C/C	C/C	C/C	C/C
Pv05	38867662	ANNZ01017866-1_5571	A	C	.	C/C	.	A/A	A/A	A/A	C/C	A/A	A/C	A/A	C/C	A/A	A/A	C/C	A/A	A/A	A/A	C/C	C/C	C/C	A/A	A/A	A/A	A/A	C/C	.	A/A	A/A	A/A	A/A	A/A	A/A	A/A	A/A	A/A	C/C	A/A	.	.	A/A	A/A	A/A	A/A	A/A	A/A
Pv05	39080203	ANNZ01017876-1_5083	T	C	.	C/C	C/C	C/C	C/C	T/T	T/T	C/C	T/T	T/C	T/T	T/T	T/T	T/T	C/C	C/C	C/C	C/C	C/C	T/T	T/C	C/C	C/C	T/T	T/T	C/C	C/C	C/C	C/C	C/C	C/C	T/T	T/T	T/T	C/C	T/T	C/C	C/C	C/C	C/C	C/C	T/T	C/C	T/T	T/T
Pv05	39182900	ANNZ01017876-1_107780	G	A	.	A/A	G/G	A/A	G/G	G/G	G/G	G/G	G/G	G/A	G/G	G/G	G/G	G/G	G/G	A/A	G/G	G/G	G/G	G/G	G/G	G/G	G/G	G/G	G/G	G/G	A/A	A/A	G/G	A/A	A/A	G/G	G/G	G/G	G/G	G/G	G/G	G/G	G/G	A/A	G/G	G/G	A/A	G/G	G/G
Pv05	39292843	ANNZ01017877-1_69518	T	C	.	C/C	T/T	C/C	T/T	T/T	T/T	C/C	T/T	T/C	T/T	T/T	T/T	T/T	T/T	C/C	C/C	C/C	C/C	T/T	T/T	T/T	T/T	T/T	T/T	T/T	C/C	C/C	C/C	C/C	C/C	T/T	T/T	T/T	T/T	T/T	T/T	T/T	T/T	C/C	C/C	T/T	C/C	T/T	T/T
Pv05	39322303	ANNZ01017877-1_98978	C	T	.	T/T	T/T	T/T	T/T	C/C	C/C	T/T	C/C	C/T	C/C	C/C	C/C	C/C	T/T	T/T	T/T	T/T	T/T	C/C	C/C	C/C	C/C	C/C	C/C	T/T	T/T	T/T	T/T	T/T	T/T	C/C	C/C	C/C	T/T	C/C	T/T	T/T	T/T	T/T	T/T	C/C	T/T	C/C	C/C
Pv05	39497168	ANNZ01017880-1_83507	T	C	.	C/C	C/C	C/C	C/C	T/T	T/T	C/C	T/T	T/C	T/T	T/T	T/T	T/T	T/T	C/C	C/C	C/C	C/C	T/T	T/T	C/C	C/C	T/T	T/T	C/C	C/C	C/C	C/C	C/C	C/C	T/T	T/T	C/C	C/C	T/T	C/C	C/C	C/C	C/C	C/C	T/T	C/C	T/T	T/T
Pv05	39562550	ANNZ01017881-1_13746	T	C	.	C/C	C/C	C/C	C/C	T/T	T/T	C/C	T/T	T/C	T/T	T/T	T/T	T/T	C/C	C/C	C/C	C/C	C/C	T/T	T/T	C/C	C/C	T/T	T/T	C/C	C/C	C/C	C/C	C/C	C/C	T/T	T/T	C/C	C/C	T/T	C/C	C/C	C/C	C/C	C/C	T/T	C/C	T/T	T/T
Pv06	94380	ANNZ01017970-1_22745	A	G	.	G/G	.	A/A	G/G	A/A	A/A	G/G	A/G	A/A	A/A	A/A	A/A	A/A	A/A	A/A	G/G	G/G	G/G	A/A	A/A	A/A	A/A	A/A	A/A	.	G/G	A/G	A/A	A/A	A/A	A/A	G/G	A/A	G/G	A/A	G/G	A/G	.	A/A	A/A	A/A	A/A	G/G	A/A
Pv06	193032	ANNZ01017972-1_57826	G	T	.	T/T	.	G/G	T/T	G/G	G/G	T/T	G/T	G/G	G/G	G/G	G/G	G/G	G/G	G/G	T/T	T/T	T/T	G/G	G/G	G/G	G/G	G/G	G/G	.	T/T	G/T	G/G	G/G	G/G	G/G	T/T	G/G	T/T	G/G	T/T	.	.	G/G	G/G	G/G	G/G	T/T	G/G
Pv06	257714	ANNZ01017979-1_1565	G	A	.	A/A	.	G/G	A/A	G/G	G/G	A/A	G/A	G/G	G/G	G/G	G/G	G/G	G/G	G/G	A/A	A/A	A/A	G/G	G/G	G/G	G/G	G/G	G/G	.	A/A	G/A	G/G	G/G	G/G	G/G	A/A	G/G	A/A	G/G	A/A	.	.	G/G	G/G	G/G	G/G	A/A	G/G
Pv06	521607	ANNZ01017992-1_1762	T	G	.	G/G	T/G	T/T	G/G	T/T	T/T	G/G	T/G	T/T	T/T	T/T	T/T	T/T	G/G	T/T	G/G	G/G	G/G	T/T	T/T	T/T	T/T	T/T	T/T	T/G	G/G	T/G	T/T	T/T	T/T	T/T	G/G	T/T	G/G	T/T	G/G	.	.	T/T	T/T	T/T	T/T	G/G	T/T
Pv06	655021	ANNZ01018002-1_29442	G	A	.	A/A	.	G/G	A/A	G/G	G/G	A/A	G/A	G/G	G/G	G/G	G/G	G/G	A/A	G/A	A/A	A/A	A/A	G/G	G/G	G/G	G/G	G/G	G/G	.	A/A	G/A	G/G	G/G	G/G	G/G	A/A	G/G	A/A	G/G	A/A	.	.	G/G	G/G	G/G	G/G	A/A	G/G
Pv06	786086	ANNZ01018014-1_5859	G	A	.	.	.	.	.	.	.	.	.	.	.	.	.	.	.	.	.	.	.	.	.	.	.	.	.	.	.	.	.	.	.	.	.	.	.	.	.	.	.	.	.	.	.	.	.
Pv06	1015034	ANNZ01018038-1_28780	T	G	.	G/G	.	T/T	G/G	T/T	T/T	G/G	T/G	T/T	T/T	T/T	T/T	T/T	G/G	T/G	G/G	G/G	G/G	T/T	T/T	T/T	T/T	T/T	T/T	.	G/G	T/G	T/T	T/T	T/T	T/T	G/G	T/T	G/G	T/T	G/G	.	.	T/T	T/T	T/T	T/T	G/G	T/T
Pv06	2740190	ANNZ01018260-1_22346	C	T	.	T/T	.	C/C	T/T	C/C	C/C	T/T	C/T	C/C	C/C	C/C	C/C	C/C	C/C	C/T	T/T	T/T	T/T	C/C	C/C	C/C	C/C	C/C	C/C	.	T/T	C/T	C/C	C/C	C/C	C/C	T/T	C/C	T/T	C/C	T/T	.	.	C/C	C/C	C/C	C/C	T/T	C/C
Pv06	2894091	ANNZ01018278-1_21120	T	C	.	C/C	T/C	T/T	C/C	T/T	.	C/C	T/C	T/T	T/T	T/T	T/T	T/T	T/T	T/T	C/C	C/C	C/C	T/T	T/T	T/T	.	T/T	T/T	T/T	C/C	T/C	T/T	T/T	T/T	T/T	C/C	T/T	T/C	T/T	C/C	.	.	T/T	T/T	T/T	T/T	C/C	T/T
Pv06	3277987	ANNZ01018319-1_16926	A	C	.	C/C	.	A/A	C/C	A/A	A/A	C/C	A/C	A/A	A/A	A/A	A/A	A/A	A/A	A/A	C/C	C/C	C/C	A/A	A/A	A/A	A/A	A/A	A/A	.	C/C	A/C	A/A	A/A	A/A	A/A	C/C	A/A	C/C	A/A	C/C	.	.	A/A	A/A	A/A	A/A	C/C	A/A
Pv06	3392903	ANNZ01018322-1_37234	G	T	.	T/T	T/T	G/G	T/T	G/G	G/G	T/T	G/T	G/G	G/G	G/G	G/G	G/G	G/G	G/T	T/T	T/T	T/T	G/G	G/G	G/G	G/G	G/G	G/G	T/T	T/T	G/T	G/G	G/G	G/G	G/G	T/T	G/G	T/T	G/G	T/T	T/T	T/T	G/G	G/G	G/G	G/G	T/T	G/G
Pv06	4043637	ANNZ01018422-1_19972	G	A	.	A/A	.	G/G	A/A	G/G	G/G	A/A	G/A	G/G	G/G	G/G	G/G	G/G	G/G	G/A	A/A	A/A	A/A	G/G	G/G	G/G	G/G	G/G	G/G	.	A/A	G/A	G/G	G/G	G/G	G/G	A/A	G/G	A/A	G/G	A/A	.	.	G/G	G/G	G/G	G/G	A/A	G/G
Pv06	4253032	ANNZ01018448-1_38164	T	C	.	C/C	.	T/T	C/C	T/T	T/T	C/C	T/C	T/T	T/T	T/T	T/T	T/T	T/T	T/T	C/C	C/C	C/C	T/T	T/T	T/T	T/T	T/T	T/T	.	C/C	T/C	T/T	T/T	T/T	T/T	C/C	T/T	C/C	T/T	C/C	.	.	T/T	T/T	T/T	T/T	C/C	T/T
Pv06	4651766	ANNZ01018478-1_27672	T	C	.	C/C	.	T/T	C/C	T/T	T/T	C/C	T/C	T/T	T/T	T/T	T/T	T/T	T/T	T/C	C/C	C/C	C/C	T/T	T/T	T/T	T/T	T/T	T/T	T/C	C/C	T/T	T/T	T/T	T/T	T/T	C/C	T/T	T/C	T/T	T/C	.	.	T/T	T/T	T/T	T/T	C/C	T/T
Pv06	4784459	ANNZ01018487-1_73447	C	T	.	T/T	.	C/C	T/T	C/C	C/C	T/T	C/T	C/C	C/C	C/C	C/C	C/C	C/C	C/C	T/T	T/T	T/T	C/C	C/C	C/C	C/C	C/C	C/C	C/T	T/T	C/T	C/C	C/C	C/C	C/C	T/T	C/C	T/T	C/C	T/T	.	.	C/C	C/C	C/C	C/C	T/T	C/C
Pv06	4894303	ANNZ01018491-1_7272	C	T	.	T/T	.	C/C	T/T	C/C	C/C	T/T	C/T	C/C	C/C	C/C	C/C	C/C	C/C	C/C	T/T	T/T	T/T	C/C	C/C	C/C	C/C	C/C	C/C	.	T/T	C/T	C/C	C/C	C/C	C/C	T/T	C/C	T/T	C/C	T/T	.	.	C/C	C/C	C/C	C/C	T/T	C/C
Pv06	4996726	ANNZ01018497-1_2789	A	G	.	G/G	.	A/A	G/G	A/A	A/A	G/G	A/G	A/A	A/A	A/A	A/A	A/A	A/A	A/A	G/G	G/G	G/G	A/A	A/A	A/A	A/A	A/A	A/A	.	G/G	A/G	A/A	A/A	A/A	A/A	G/G	A/A	G/G	A/A	G/G	.	.	A/A	A/A	A/A	A/A	G/G	A/A
Pv06	5058196	ANNZ01018498-1_2097	G	A	.	A/A	.	G/G	A/A	G/G	.	A/A	G/A	G/G	G/G	G/G	G/G	G/G	G/G	G/A	A/A	A/A	A/A	G/G	G/G	G/G	G/G	.	G/G	.	A/A	G/A	G/G	G/G	G/G	G/G	A/A	G/G	.	G/A	A/A	.	.	G/G	.	G/G	G/A	A/A	G/G
Pv06	5192272	ANNZ01018527-1_14599	T	C	.	C/C	.	T/T	C/C	T/T	T/T	C/C	T/C	T/T	T/T	T/T	T/T	T/T	T/T	T/T	C/C	C/C	C/C	T/T	T/T	T/T	T/T	T/T	T/T	.	C/C	T/C	T/T	T/T	T/T	T/T	C/C	T/T	C/C	T/T	C/C	.	.	T/T	T/T	T/T	T/T	C/C	T/T
Pv06	5275960	ANNZ01018532-1_33640	G	T	.	T/T	.	G/G	T/T	G/G	G/G	T/T	G/T	G/G	G/G	G/G	G/G	G/G	G/G	G/G	T/T	T/T	T/T	G/G	G/G	G/G	G/G	G/G	G/G	.	T/T	G/T	G/G	G/G	G/G	G/G	T/T	G/G	T/T	G/G	T/T	.	.	G/G	G/G	G/G	G/G	T/T	G/G
Pv06	5480411	ANNZ01018555-1_24453	C	A	.	A/A	.	C/C	A/A	C/C	C/C	A/A	C/A	C/C	C/C	C/C	C/C	C/C	C/C	C/C	A/A	A/A	A/A	C/C	C/C	C/C	C/C	C/C	C/C	.	A/A	C/A	C/C	C/C	C/C	C/C	A/A	C/C	A/A	C/C	A/A	.	.	C/C	C/C	C/C	C/C	A/A	C/C
Pv06	5563484	ANNZ01018557-1_40459	T	C	.	T/T	.	T/T	C/C	T/T	T/T	C/C	T/C	T/T	T/T	T/T	T/T	T/T	T/T	T/T	C/C	T/T	C/C	T/T	T/T	T/T	T/T	T/T	T/T	.	C/C	T/C	T/T	T/T	T/T	T/T	C/C	T/T	T/C	T/T	C/C	.	.	T/T	T/T	T/T	T/T	C/C	T/T
Pv06	5657180	ANNZ01018567-1_4978	C	A	.	C/C	.	C/C	A/A	C/C	C/C	A/A	C/A	C/C	C/C	C/C	C/C	C/C	C/C	C/C	A/A	C/C	A/A	C/C	C/C	C/C	C/C	C/C	C/C	.	A/A	C/A	C/C	C/C	C/C	C/C	A/A	C/C	A/A	C/C	A/A	.	.	C/C	C/C	C/C	C/C	A/A	C/C
Pv06	5790909	ANNZ01018578-1_33714	T	C	.	C/C	.	T/T	C/C	T/T	T/T	C/C	T/C	T/T	T/T	T/T	T/T	T/T	T/T	T/T	C/C	C/C	C/C	T/T	T/T	T/T	T/T	T/T	T/T	.	C/C	T/C	T/T	T/T	T/T	T/T	C/C	T/T	C/C	T/T	C/C	.	.	T/T	T/T	T/T	T/T	C/C	T/T
Pv06	5836750	ANNZ01018578-1_79555	T	C	.	C/C	.	T/T	C/C	T/T	T/T	C/C	T/C	T/T	T/T	T/T	T/T	T/T	T/T	T/T	C/C	C/C	C/C	T/T	T/T	T/T	T/T	T/T	T/T	.	C/C	T/C	T/T	T/T	T/T	T/T	C/C	T/T	C/C	T/T	C/C	.	.	T/T	T/T	T/T	T/T	C/C	T/T
Pv06	5924610	ANNZ01018589-1_21934	A	G	.	G/G	A/G	A/A	G/G	A/A	A/A	G/G	A/G	A/A	A/A	A/A	A/A	A/A	A/A	A/A	G/G	G/G	G/G	A/A	A/A	A/A	A/A	A/A	A/A	.	G/G	A/G	A/A	A/A	A/A	A/A	G/G	A/A	G/G	A/A	G/G	.	.	A/A	A/A	A/A	A/A	G/G	A/A
Pv06	6293995	ANNZ01018644-1_22262	C	T	.	T/T	.	C/C	T/T	C/C	C/C	T/T	C/T	C/C	C/C	C/C	C/C	C/C	C/C	C/C	T/T	T/T	T/T	C/C	C/C	C/C	C/C	C/C	C/C	.	T/T	C/T	C/C	C/C	C/C	C/C	T/T	C/C	C/T	C/C	T/T	.	.	C/C	C/C	C/C	C/C	T/T	C/C
Pv06	6397326	ANNZ01018649-1_20647	A	G	.	G/G	.	A/A	G/G	A/G	A/A	G/G	A/G	A/A	A/A	A/A	A/A	A/A	A/A	A/G	G/G	G/G	G/G	A/A	A/A	A/A	A/A	A/A	A/A	.	G/G	A/G	A/A	A/A	A/A	A/A	G/G	A/A	G/G	A/A	G/G	.	.	A/A	A/A	A/A	A/A	G/G	A/A
Pv06	6459230	ANNZ01018651-1_46389	A	C	.	C/C	A/C	A/A	C/C	A/A	A/A	C/C	A/C	A/A	A/A	A/A	A/A	A/A	A/A	A/C	C/C	C/C	C/C	A/A	A/A	A/A	A/A	A/A	A/A	A/C	C/C	A/C	A/A	A/A	A/A	A/A	C/C	A/A	C/C	A/A	C/C	A/C	C/C	A/A	A/A	A/A	A/A	C/C	A/A
Pv06	6538329	ANNZ01018652-1_39060	C	A	.	C/C	.	C/C	C/C	C/C	C/C	C/C	C/C	C/C	C/C	C/C	C/C	C/C	.	C/C	C/C	C/C	C/C	C/C	C/C	C/C	C/C	C/C	C/C	.	C/C	C/C	C/C	C/C	C/C	C/C	.	C/C	C/A	C/C	C/C	.	.	C/C	C/C	C/C	C/C	C/A	C/C
Pv06	6818373	ANNZ01018668-1_19700	T	C	.	C/C	.	T/T	C/C	T/T	T/T	C/C	T/C	T/T	T/T	T/T	T/T	T/T	T/T	T/T	C/C	C/C	C/C	T/T	T/T	T/T	T/T	T/T	T/T	.	C/C	T/C	T/T	T/T	T/T	T/T	C/C	T/T	C/C	T/T	C/C	.	.	T/T	T/T	T/T	T/T	C/C	T/T
Pv06	6943287	ANNZ01018676-1_6406	G	A	.	A/A	.	G/G	A/A	G/G	G/G	A/A	G/A	G/G	G/G	G/G	G/G	G/G	G/G	G/G	A/A	A/A	G/G	G/G	G/G	G/G	G/G	G/G	G/G	.	A/A	G/G	G/G	G/G	G/G	G/G	A/A	G/G	A/A	G/G	G/G	.	.	G/G	G/G	G/G	G/G	A/A	G/G
Pv06	7394347	ANNZ01018741-1_11121	T	C	.	T/T	C/C	T/T	C/C	T/T	T/T	C/C	T/C	T/T	T/T	T/T	T/T	T/T	C/C	T/C	C/C	T/T	C/C	T/T	T/T	T/T	T/T	T/T	T/T	C/C	C/C	T/C	T/T	T/T	T/T	T/T	C/C	T/T	C/C	T/T	C/C	C/C	C/C	T/T	T/T	T/T	T/T	C/C	T/T
Pv06	7445433	ANNZ01018743-1_41403	G	A	.	A/A	.	G/G	A/A	G/G	G/G	A/A	G/A	G/G	G/G	G/G	G/G	G/G	A/A	G/G	A/A	A/A	A/A	G/G	G/G	G/G	G/G	G/G	G/G	.	A/A	G/A	G/G	G/G	G/G	G/G	A/A	G/G	A/A	G/G	A/A	.	.	G/G	G/G	G/G	G/G	A/A	G/G
Pv06	7899860	ANNZ01018794-1_27531	C	T	.	C/C	.	C/C	C/C	C/C	C/C	C/C	C/C	C/C	C/C	C/C	C/C	C/C	T/T	C/C	C/C	C/C	C/C	C/C	C/C	C/C	C/C	C/C	C/C	.	C/C	C/C	C/C	C/C	C/C	C/C	T/T	C/C	T/T	C/C	C/C	.	.	C/C	C/C	C/C	C/C	T/T	C/C
Pv06	8080231	ANNZ01018814-1_14484	C	T	.	T/T	C/C	C/C	T/T	C/C	C/C	T/T	C/T	C/C	C/C	C/C	C/C	C/C	T/T	C/C	T/T	T/T	T/T	C/C	C/C	C/C	C/C	C/C	C/C	C/C	T/T	C/T	C/C	C/C	C/C	C/C	T/T	C/C	T/T	C/C	T/T	C/C	C/C	C/C	C/C	C/C	C/C	T/T	C/C
Pv06	8168075	ANNZ01018819-1_60434	C	T	.	T/T	.	C/C	T/T	C/C	C/C	T/T	C/T	C/C	C/C	C/C	C/C	C/C	T/T	C/C	T/T	T/T	T/T	C/C	C/C	C/C	C/C	C/C	C/C	.	T/T	C/T	C/C	C/C	T/T	C/C	T/T	C/C	T/T	C/C	T/T	.	.	C/C	C/C	C/C	T/T	T/T	C/C
Pv06	8404581	ANNZ01018863-1_7365	G	A	.	A/A	.	G/G	.	G/G	.	.	G/G	G/G	G/G	G/G	G/G	.	.	G/G	A/A	.	.	G/G	G/G	G/G	.	G/G	G/G	.	.	G/G	G/G	.	.	G/G	.	G/G	.	G/G	.	.	.	G/G	G/G	.	.	.	G/G
Pv06	8591293	ANNZ01018882-1_28046	T	C	.	C/C	T/T	T/T	C/C	T/T	T/T	C/C	T/C	T/T	T/T	T/T	T/T	T/T	C/C	T/T	C/C	C/C	C/C	T/T	T/T	T/T	T/T	T/T	T/T	T/T	C/C	T/C	T/T	T/T	C/C	T/T	C/C	T/T	C/C	T/T	C/C	T/T	T/T	T/T	T/T	T/T	C/C	C/C	T/T
Pv06	8830196	ANNZ01018910-1_23522	A	C	.	C/C	.	A/A	C/C	A/A	A/A	C/C	A/C	A/A	A/A	A/A	A/A	A/A	C/C	A/A	C/C	C/C	C/C	A/A	A/A	A/A	A/A	A/A	A/A	.	C/C	A/C	A/A	A/A	C/C	A/A	C/C	A/A	C/C	A/A	C/C	.	.	A/A	A/A	A/A	C/C	C/C	A/A
Pv06	8933885	ANNZ01018924-1_49325	T	G	.	G/G	.	T/T	G/G	T/T	T/T	G/G	T/G	T/T	T/T	T/T	T/T	T/T	G/G	T/T	G/G	G/G	G/G	T/T	T/T	T/T	T/T	T/T	T/T	.	G/G	T/G	T/T	T/T	G/G	T/T	G/G	T/T	G/G	T/T	G/G	.	.	T/T	T/T	T/T	G/G	G/G	T/T
Pv06	9005680	ANNZ01018928-1_21008	C	T	.	T/T	.	T/T	T/T	C/C	C/C	T/T	C/T	C/C	C/C	C/C	C/C	C/C	T/T	T/T	T/T	T/T	T/T	C/C	C/C	C/C	C/C	C/C	C/C	C/T	T/T	T/T	T/T	C/C	T/T	C/C	T/T	C/C	T/T	C/C	T/T	.	.	C/T	T/T	C/C	T/T	T/T	C/C
Pv06	9116322	ANNZ01018933-1_30327	C	T	.	T/T	C/T	T/T	T/T	C/C	C/C	T/T	C/T	C/C	C/C	C/C	C/C	C/C	T/T	C/T	T/T	T/T	T/T	C/C	C/C	C/C	C/C	C/C	C/C	C/T	T/T	T/T	T/T	C/C	T/T	C/C	T/T	C/C	T/T	C/C	T/T	C/T	C/C	T/T	T/T	C/C	T/T	T/T	C/C
Pv06	9363801	ANNZ01018944-1_32869	A	C;T	.	C/C	T/T	C/C	C/C	A/A	A/A	C/C	A/C	A/A	A/A	A/A	A/A	A/A	C/C	A/C	C/C	C/C	C/C	A/A	A/A	A/A	A/A	A/A	A/A	T/T	C/C	C/C	C/C	A/A	C/C	A/A	C/C	A/A	C/C	A/A	C/C	T/T	T/T	C/C	C/C	A/A	C/C	C/C	A/A
Pv06	9482874	ANNZ01018954-1_2953	T	C	.	C/C	.	C/C	C/C	T/T	T/T	C/C	T/C	T/T	T/T	T/T	T/T	T/T	C/C	T/C	C/C	C/C	C/C	T/T	T/T	T/T	T/T	T/T	T/T	T/T	C/C	C/C	C/C	T/T	C/C	T/T	C/C	T/T	C/C	T/T	C/C	T/T	.	C/C	C/C	T/T	C/C	C/C	T/T
Pv06	9619281	ANNZ01018962-1_8926	C	T	.	C/C	C/C	C/C	C/C	C/C	C/C	C/C	C/C	C/C	C/C	C/C	C/C	C/C	C/C	C/C	C/C	C/C	T/T	C/C	C/C	C/C	C/C	C/C	C/C	C/C	C/C	C/C	C/C	C/C	C/C	C/C	T/T	C/C	T/T	C/C	C/C	C/C	C/C	C/C	C/C	C/C	C/C	T/T	C/C
Pv06	9858482	ANNZ01018980-1_41591	C	T	.	C/C	.	C/C	C/C	C/C	C/C	C/C	C/C	C/C	C/C	C/C	C/C	C/C	C/C	C/C	C/C	C/C	T/T	C/C	C/C	C/C	C/C	C/C	C/C	C/C	C/C	C/C	C/C	C/C	C/C	C/C	T/T	C/C	T/T	C/C	C/C	.	.	C/C	C/C	C/C	C/C	T/T	C/C
Pv06	9904196	ANNZ01018983-1_9845	G	T	.	T/T	.	T/T	T/T	G/G	G/G	T/T	G/T	G/G	G/G	G/G	G/G	G/G	T/T	T/T	T/T	T/T	T/T	G/G	G/G	G/G	G/G	G/G	G/G	.	T/T	T/T	T/T	G/G	T/T	G/G	T/T	G/G	T/T	G/G	T/T	.	.	T/T	T/T	G/G	T/T	T/T	G/G
Pv06	10227525	ANNZ01018989-1_161053	T	C	.	C/C	C/C	C/C	C/C	T/T	T/T	C/C	T/C	T/T	T/T	T/T	T/T	T/T	C/C	C/C	C/C	C/C	C/C	T/T	T/T	T/T	T/T	T/T	T/T	C/C	C/C	C/C	C/C	T/T	C/C	T/T	C/C	T/T	C/C	T/T	C/C	C/C	C/C	C/C	C/C	T/T	C/C	C/C	T/T
Pv06	10477403	ANNZ01019003-1_47995	T	C	.	C/C	.	T/C	C/C	T/T	T/T	C/C	T/T	T/T	T/T	T/T	T/T	T/T	.	.	.	.	.	T/T	T/T	T/T	T/T	T/T	T/T	.	C/C	C/C	C/C	T/T	T/C	T/T	.	T/T	T/C	T/T	T/C	.	.	C/C	.	T/T	.	T/C	T/T
Pv06	10571358	ANNZ01019010-1_2291	C	T	.	T/T	.	T/T	T/T	C/C	C/C	T/T	C/T	C/C	C/C	C/C	C/C	C/C	T/T	T/T	T/T	C/C	C/C	C/C	C/C	C/C	C/C	C/C	C/C	.	T/T	T/T	T/T	C/C	T/T	C/C	T/T	C/C	T/T	C/C	T/T	.	.	T/T	T/T	C/C	T/T	T/T	C/C
Pv06	10665788	ANNZ01019018-1_35865	G	A	.	A/A	G/G	A/A	A/A	G/G	G/G	A/A	G/A	G/G	G/G	G/G	G/G	G/G	A/A	A/A	A/A	G/G	G/G	G/G	G/G	G/G	G/G	G/G	G/G	G/G	A/A	A/A	A/A	G/G	A/A	G/G	A/A	G/G	A/A	G/G	A/A	G/G	G/G	A/A	A/A	G/G	A/A	A/A	G/G
Pv06	10782043	ANNZ01019027-1_3436	G	A	.	A/A	.	A/A	A/A	G/G	G/G	A/A	G/A	G/G	G/G	G/G	G/G	G/G	A/A	G/A	A/A	G/G	G/G	G/G	G/G	G/G	G/G	G/G	G/G	G/A	A/A	A/A	A/A	G/G	A/A	G/G	A/A	G/G	A/A	G/G	A/A	.	.	A/A	A/A	G/G	A/A	A/A	G/G
Pv06	10874858	ANNZ01019041-1_8118	G	A	.	A/A	.	A/A	A/A	G/G	G/G	A/A	G/A	G/G	G/G	G/G	G/G	G/G	A/A	A/A	A/A	G/G	G/G	G/G	G/G	G/G	G/G	G/G	G/G	.	A/A	A/A	A/A	G/G	A/A	G/G	A/A	G/G	A/A	G/G	A/A	.	.	A/A	A/A	G/G	A/A	A/A	G/G
Pv06	11052618	ANNZ01019058-1_11252	G	T	.	T/T	.	T/T	T/T	G/G	G/G	T/T	G/T	G/G	G/G	G/G	G/G	G/G	T/T	T/T	T/T	G/G	.	G/G	G/G	G/G	G/G	G/G	G/G	.	T/T	T/T	T/T	G/G	T/T	G/G	T/T	G/G	T/T	G/G	T/T	.	.	T/T	T/T	G/G	T/T	T/T	G/G
Pv06	11294220	ANNZ01019101-1_6504	T	G	.	G/G	.	G/G	G/G	T/T	T/T	G/G	T/G	T/T	T/T	T/T	T/T	T/T	G/G	G/G	G/G	G/G	G/G	T/T	T/T	T/T	T/T	T/T	T/T	.	G/G	G/G	G/G	T/T	G/G	T/T	G/G	T/T	G/G	T/T	G/G	.	.	G/G	G/G	T/T	G/G	G/G	T/T
Pv06	11378754	ANNZ01019108-1_7775	C	T	.	T/T	.	T/T	T/T	C/C	C/C	T/T	C/T	C/C	C/C	C/C	C/C	C/C	T/T	C/T	T/T	C/C	C/C	C/C	C/C	C/C	C/C	C/C	C/C	.	T/T	T/T	T/T	C/C	T/T	C/C	T/T	C/C	T/T	C/C	T/T	.	.	T/T	T/T	C/C	T/T	T/T	C/C
Pv06	11586795	ANNZ01019127-1_21426	C	T	.	T/T	.	T/T	T/T	C/C	C/C	T/T	C/T	C/C	C/C	C/C	C/C	C/C	T/T	T/T	T/T	.	C/C	C/C	C/C	C/C	C/C	C/C	C/C	.	T/T	T/T	T/T	C/C	T/T	C/C	T/T	C/C	T/T	C/C	T/T	.	.	T/T	T/T	C/C	T/T	T/T	C/C
Pv06	11631797	ANNZ01019128-1_18024	G	A	.	A/A	.	A/A	A/A	G/G	G/G	A/A	G/A	G/G	G/G	G/G	G/G	G/G	A/A	A/A	A/A	G/G	G/G	G/G	G/G	G/G	G/G	G/G	G/G	.	A/A	A/A	A/A	G/G	A/A	G/G	A/A	G/G	A/A	G/G	A/A	.	.	A/A	A/A	G/G	A/A	A/A	G/G
Pv06	11794564	ANNZ01019147-1_31094	C	T	.	T/T	.	T/T	T/T	C/C	C/C	T/T	C/T	C/C	C/C	C/C	C/C	C/C	T/T	T/T	T/T	.	C/C	C/C	C/C	C/C	C/C	C/C	C/C	.	T/T	T/T	T/T	C/C	T/T	C/C	T/T	C/C	T/T	C/C	T/T	.	.	T/T	T/T	C/C	T/T	T/T	C/C
Pv06	11823894	ANNZ01019150-1_3688	A	G	.	G/G	.	G/G	G/G	A/A	A/A	G/G	A/G	A/A	A/A	A/A	A/A	A/A	G/G	G/G	G/G	.	A/A	A/A	A/A	A/A	A/A	A/A	A/A	.	G/G	G/G	G/G	A/A	G/G	A/A	G/G	A/A	G/G	A/A	G/G	.	.	G/G	G/G	A/A	G/G	G/G	A/A
Pv06	12330337	ANNZ01019174-1_77503	C	A	.	A/A	.	A/A	A/A	C/C	C/C	A/A	C/A	C/C	C/C	C/C	C/C	C/C	A/A	A/A	A/A	A/A	A/A	C/C	C/C	C/C	C/C	C/C	C/C	.	A/A	A/A	A/A	C/C	A/A	C/C	A/A	C/C	A/A	C/C	A/A	.	.	A/A	A/A	C/C	A/A	A/A	C/C
Pv06	12412774	ANNZ01019177-1_45628	A	G	.	G/G	G/G	G/G	A/A	A/A	A/A	A/A	A/G	A/A	A/A	A/A	A/A	A/A	G/G	A/G	A/A	G/G	G/G	A/A	A/A	A/A	A/A	A/A	A/A	G/G	G/G	G/G	G/G	A/A	G/G	A/A	G/G	A/A	G/G	A/A	G/G	G/G	G/G	G/G	G/G	A/A	G/G	G/G	A/A
Pv06	20339470	ANNZ01019654-1_8226	G	A	.	A/A	.	A/A	A/A	G/G	G/G	G/G	G/G	G/G	G/G	G/G	G/G	G/G	A/A	A/A	A/A	A/A	A/A	G/G	G/G	G/G	G/G	G/G	G/G	.	A/A	A/A	A/A	G/G	A/A	G/G	G/G	G/G	G/G	G/G	A/A	.	.	A/A	A/A	G/G	A/A	G/G	G/G
Pv06	20586377	ANNZ01019671-1_6591	A	C	.	A/A	A/C	C/C	C/C	A/A	A/A	A/A	A/A	A/A	A/A	A/A	A/A	A/A	A/A	A/C	C/C	A/A	A/A	A/A	A/A	A/A	A/A	A/A	A/A	A/A	C/C	C/C	C/C	A/A	C/C	A/A	A/A	A/A	A/A	A/A	C/C	C/C	.	C/C	C/C	A/A	C/C	A/A	A/A
Pv06	20675014	ANNZ01019675-1_1662	C	T	.	T/T	C/C	T/T	T/T	C/C	C/C	T/T	C/C	C/C	C/C	C/C	C/C	C/C	T/T	C/T	C/C	T/T	T/T	C/C	C/C	C/C	C/C	C/C	C/C	C/C	C/C	T/T	T/T	C/C	C/C	C/C	C/C	C/C	C/C	C/C	T/T	C/C	C/C	T/T	T/T	C/C	T/T	C/C	C/C
Pv06	21496876	ANNZ01019705-1_3678	T	C	.	T/T	.	T/T	T/T	T/T	T/T	T/T	T/T	T/T	T/T	T/T	T/T	T/T	C/C	T/T	T/T	T/T	T/T	T/T	T/T	T/T	T/T	T/T	T/T	.	T/T	T/C	T/T	T/T	T/T	T/T	T/T	T/T	T/T	T/T	C/C	.	.	T/T	T/T	T/T	C/C	T/T	T/T
Pv06	21552819	ANNZ01019706-1_30232	C	T	.	C/C	C/C	T/T	C/C	C/C	C/C	C/C	C/C	C/C	C/C	C/C	C/C	C/C	T/T	C/T	C/C	C/C	C/C	C/C	C/C	C/C	C/C	C/C	C/C	C/C	C/C	T/T	T/T	C/C	C/C	C/C	C/C	C/C	C/C	C/C	T/T	C/C	C/C	T/T	T/T	C/C	T/T	C/C	C/C
Pv06	24246872	ANNZ01019821-1_7190	A	G	.	A/A	A/A	A/A	A/A	A/A	A/A	A/A	A/A	A/G	G/G	A/A	A/A	A/A	A/A	A/A	A/A	A/A	A/A	A/A	A/A	G/G	A/A	A/A	A/A	A/A	A/A	A/A	A/A	A/A	A/A	A/A	A/A	A/A	A/A	G/G	A/A	A/A	A/A	A/A	A/A	A/A	A/A	A/A	A/A
Pv06	24482201	ANNZ01019826-1_21925	C	T	.	C/C	.	T/T	C/C	C/C	T/T	C/C	T/T	C/T	C/C	T/T	T/T	T/T	C/C	T/T	C/C	C/C	C/C	T/T	T/T	C/C	T/T	T/T	T/T	.	C/C	T/T	C/C	C/C	C/C	T/T	T/T	C/C	T/T	C/C	T/T	.	.	T/T	C/C	T/T	C/C	T/T	T/T
Pv06	24672740	ANNZ01019835-1_34209	T	C	.	C/C	T/T	T/T	T/T	T/T	T/T	T/T	T/T	T/C	C/C	T/T	T/T	T/T	T/T	T/T	T/T	T/T	T/T	T/T	T/T	C/C	T/T	T/T	T/T	T/T	C/C	T/T	T/T	T/T	T/T	T/T	T/T	T/T	T/T	C/C	T/T	T/T	T/T	T/T	T/T	T/T	T/T	T/T	T/T
Pv06	24895085	ANNZ01019838-1_12360	T	G	.	T/T	T/T	G/G	T/T	T/T	T/T	T/T	T/T	T/G	G/G	T/T	T/T	T/T	G/G	G/G	G/G	T/T	T/T	T/T	T/T	G/G	T/T	T/T	T/T	T/T	T/T	T/G	G/G	G/G	T/T	T/T	T/T	T/T	T/T	G/G	T/T	T/T	T/T	G/G	G/G	T/T	T/T	T/T	T/T
Pv06	24951098	ANNZ01019839-1_27036	A	G	.	G/G	G/G	G/G	A/A	A/A	A/A	A/A	A/A	A/G	G/G	A/A	A/A	A/A	G/G	G/G	A/A	A/A	A/A	A/A	A/A	G/G	A/A	A/A	A/A	G/G	G/G	A/G	G/G	A/A	A/A	A/A	A/A	A/A	A/A	G/G	A/A	G/G	G/G	G/G	G/G	A/A	A/A	A/A	A/A
Pv06	25050978	ANNZ01019839-1_126916	G	A	.	A/A	G/G	G/G	G/G	G/G	G/G	G/G	G/G	G/A	A/A	G/G	G/G	G/G	G/G	G/G	G/G	G/G	G/G	G/G	G/G	A/A	A/A	G/G	G/G	G/G	A/A	G/G	G/G	G/G	G/G	G/G	G/G	G/G	G/G	A/A	G/G	G/G	G/G	G/G	G/G	G/G	G/G	G/G	G/G
Pv06	25190824	ANNZ01019846-1_6940	C	T	.	C/C	.	T/T	T/T	C/C	T/T	T/T	T/T	C/T	C/C	T/T	T/T	T/T	T/T	T/T	T/T	T/T	T/T	T/T	T/T	C/C	C/T	T/T	T/T	.	C/C	T/T	T/T	T/T	T/T	T/T	T/T	T/T	T/T	C/C	T/T	.	.	T/T	T/T	T/T	T/T	T/T	T/T
Pv06	25535869	ANNZ01019871-1_45267	C	T	.	T/T	C/C	T/T	C/C	C/C	C/C	T/T	C/C	C/C	C/C	C/C	C/C	C/C	C/C	T/T	T/T	T/T	T/T	C/C	C/C	C/C	C/C	C/C	C/C	C/C	C/C	C/T	T/T	T/T	C/C	C/C	C/C	C/C	C/C	C/C	C/C	C/C	C/C	T/T	T/T	C/C	C/C	C/C	C/C
Pv06	25645479	ANNZ01019872-1_6182	C	A	.	C/C	.	C/C	C/C	C/C	C/C	C/C	C/C	C/A	A/A	C/C	C/C	C/C	C/C	C/C	C/C	C/C	C/C	C/C	C/C	A/A	A/A	C/C	C/C	.	C/C	C/C	C/C	C/C	C/C	C/C	C/C	C/C	C/C	A/A	C/C	.	.	C/C	C/C	C/C	C/C	C/C	C/C
Pv06	25750947	ANNZ01019875-1_1250	G	T	.	G/G	.	G/G	G/G	G/G	G/G	G/G	G/T	T/T	T/T	G/G	G/G	G/G	G/G	G/G	G/G	G/G	G/G	.	G/G	T/T	T/T	G/G	G/G	.	G/G	G/G	G/G	G/G	G/G	T/T	G/G	G/G	G/G	T/T	G/G	.	.	G/G	G/G	G/G	G/G	G/G	G/G
Pv06	25816530	ANNZ01019875-1_66833	T	C	.	C/C	C/C	T/C	T/T	T/T	T/T	C/C	T/T	T/T	T/T	T/T	T/T	T/T	T/T	T/T	T/T	C/C	C/C	T/T	T/T	T/T	T/T	T/T	T/T	C/C	C/C	T/T	C/C	T/T	T/T	T/T	T/T	T/T	T/T	T/T	T/T	C/C	C/C	T/T	C/C	T/T	T/T	T/T	T/T
Pv06	27437837	ANNZ01019921-1_244245	C	T	.	C/C	C/C	C/C	C/C	C/C	C/C	C/C	C/C	C/T	T/T	T/T	C/C	C/C	C/C	C/C	C/C	C/C	C/C	C/C	C/C	T/T	T/T	C/C	C/T	C/C	C/C	C/C	C/C	C/C	C/C	C/C	C/C	C/C	C/C	T/T	C/C	C/C	C/C	C/C	C/C	C/C	C/C	C/C	C/C
Pv06	28640704	ANNZ01019957-1_56711	G	T	.	T/T	G/G	G/G	G/G	G/G	G/G	T/T	G/T	G/G	T/T	G/G	G/G	G/G	T/T	G/G	G/G	G/G	G/G	G/G	G/G	T/T	G/G	G/G	G/G	G/G	G/G	G/G	T/T	G/G	G/G	G/G	G/G	G/G	G/G	G/G	G/G	G/G	G/G	G/T	T/T	G/G	G/G	G/G	G/G
Pv07	95703	ANNZ01020032-1_94935	A	G	.	A/A	.	G/G	G/G	A/A	A/A	A/A	A/A	A/A	A/A	A/A	A/A	A/A	A/A	A/A	G/G	A/A	A/A	A/A	A/A	A/A	A/A	A/A	A/A	.	A/A	A/A	G/G	A/A	A/A	A/A	A/A	A/A	A/A	A/A	A/A	.	.	A/A	G/G	A/A	A/A	A/A	A/A
Pv07	197583	ANNZ01020032-1_196815	G	A	.	G/G	G/G	A/A	A/A	G/G	G/G	G/G	G/G	G/G	G/G	G/G	G/G	G/G	A/A	A/A	A/A	G/G	G/G	G/G	G/G	G/G	G/G	G/G	G/G	G/G	G/G	G/G	A/A	G/G	A/A	G/G	G/G	G/G	G/G	G/G	G/G	G/G	G/G	G/G	A/A	G/G	A/A	G/G	G/G
Pv07	234207	ANNZ01020032-1_233439	T	C	.	T/T	T/T	C/C	C/C	T/T	T/T	T/T	T/T	T/T	T/T	T/T	T/T	T/T	T/T	T/T	C/C	T/T	T/T	T/T	T/T	T/T	T/T	T/T	T/T	T/T	T/T	T/T	C/C	T/T	C/C	T/T	T/T	T/T	T/T	T/T	T/T	T/T	T/T	T/T	C/C	T/T	C/C	T/T	T/T
Pv07	570604	ANNZ01020037-1_121379	T	C	.	T/T	C/C	C/C	C/C	T/T	T/T	T/T	T/T	T/T	T/T	T/T	T/T	T/T	T/T	C/C	C/C	T/T	T/T	T/T	T/T	T/T	T/T	T/T	T/T	C/C	T/T	T/T	C/C	T/T	C/C	T/T	T/T	T/T	T/T	T/T	T/T	C/C	C/C	T/T	C/C	T/T	C/C	T/T	T/T
Pv07	633913	ANNZ01020037-1_184688	T	C	.	C/C	C/C	T/T	T/T	T/T	T/T	T/T	C/C	T/C	T/T	T/T	T/T	T/T	C/C	C/C	T/T	C/C	C/C	T/T	T/T	T/T	T/T	C/C	T/T	C/C	T/T	T/T	T/T	T/T	T/T	T/T	T/T	T/T	T/T	C/C	T/T	C/C	C/C	T/T	T/T	T/T	T/T	T/T	T/T
Pv07	794870	ANNZ01020039-1_55010	A	G	.	A/A	A/A	G/G	G/G	A/A	A/A	A/A	A/G	A/A	A/A	A/A	A/A	A/A	G/G	A/A	G/G	G/G	A/A	A/A	A/A	A/A	A/A	A/A	A/A	A/A	A/A	G/G	G/G	A/A	G/G	A/A	A/A	A/A	A/A	A/A	G/G	A/A	A/A	G/G	G/G	A/A	G/G	A/A	A/A
Pv07	894829	ANNZ01020039-1_155029	G	A	.	A/A	.	A/A	A/A	G/G	G/G	G/G	G/A	G/G	G/G	G/G	G/G	G/G	G/G	G/G	A/A	A/A	G/G	G/G	G/G	G/G	G/G	G/G	G/G	.	G/G	A/A	A/A	G/G	A/A	G/G	G/G	G/G	G/G	A/A	A/A	.	.	A/A	A/A	G/G	A/A	G/G	G/G
Pv07	981168	ANNZ01020040-1_70840	T	C	.	C/C	T/T	C/C	C/C	T/T	T/T	C/C	T/T	T/C	T/T	C/C	T/T	T/T	T/T	T/T	C/C	T/T	C/C	T/T	T/T	T/T	T/T	T/T	T/T	T/T	T/T	C/C	C/C	T/T	C/C	T/T	T/T	T/T	T/T	T/T	T/T	T/T	T/T	C/C	C/C	T/T	C/C	T/T	T/T
Pv07	1158951	ANNZ01020041-1_109971	A	G	.	A/A	A/A	G/G	G/G	G/G	G/G	A/A	A/G	A/G	G/G	A/A	G/G	G/G	A/A	.	G/G	A/A	A/A	G/G	G/G	G/G	G/G	A/A	G/G	G/G	A/A	G/G	G/G	G/G	G/G	G/G	G/G	G/G	G/G	A/A	A/A	A/G	A/G	A/A	G/G	G/G	G/G	G/G	G/G
Pv07	1573849	ANNZ01020049-1_14709	G	T	.	G/G	G/G	T/T	G/G	G/G	T/T	G/G	G/T	T/T	T/T	G/G	T/T	T/T	G/G	G/G	G/G	G/G	G/G	T/T	T/T	T/T	T/T	T/T	T/T	G/G	T/T	T/T	T/T	T/T	T/T	T/T	T/T	T/T	T/T	G/G	T/T	G/G	G/G	G/G	T/T	T/T	T/T	T/T	T/T
Pv07	1642908	ANNZ01020051-1_31501	C	A	.	A/A	C/C	.	A/A	.	.	.	C/A	C/A	C/C	C/C	C/C	C/C	.	C/C	A/A	.	.	C/C	C/C	C/C	.	.	C/C	C/C	A/A	A/A	A/A	C/C	.	C/C	C/C	.	.	.	A/A	C/C	.	.	.	.	A/A	C/C	.
Pv07	1793745	ANNZ01020055-1_59716	T	G	.	G/G	T/T	G/G	G/G	T/T	T/T	G/G	T/G	T/G	T/T	T/T	T/T	T/T	T/T	T/T	G/G	T/T	G/G	T/T	T/T	T/T	T/T	T/T	T/T	T/T	T/T	T/T	G/G	T/T	G/G	T/T	T/T	T/T	T/T	G/G	T/T	T/T	T/T	G/G	G/G	T/T	G/G	T/T	T/T
Pv07	1810214	ANNZ01020055-1_76125	A	G	.	A/A	A/A	A/A	A/A	A/A	G/G	A/A	A/G	A/G	G/G	A/A	G/G	G/G	A/A	G/G	A/A	G/G	A/A	G/G	G/G	G/G	G/G	G/G	G/G	A/A	G/G	G/G	A/A	G/G	A/A	G/G	G/G	G/G	G/G	A/A	G/G	A/A	A/A	A/A	A/A	G/G	A/A	G/G	G/G
Pv07	2120435	ANNZ01020064-1_21584	C	T	.	C/C	C/C	T/T	T/T	C/C	C/C	C/C	C/C	C/C	C/C	C/C	C/C	C/C	C/C	T/T	T/T	C/C	C/C	C/C	C/C	C/C	C/C	C/C	C/C	C/C	T/T	C/C	T/T	C/C	T/T	C/C	C/C	C/C	C/C	C/C	C/C	C/C	C/C	C/C	T/T	C/C	T/T	C/C	C/C
Pv07	2372142	ANNZ01020069-1_48928	A	C	.	A/A	.	C/C	C/C	A/A	A/A	A/A	A/A	A/A	A/A	A/A	A/A	A/A	C/C	C/C	C/C	A/A	A/A	A/A	A/A	A/A	A/A	A/A	A/A	.	C/C	A/A	C/C	A/A	A/A	A/A	A/A	A/A	A/A	A/C	A/A	.	.	A/A	C/C	A/A	A/A	A/A	A/A
Pv07	2433811	ANNZ01020074-1_7360	T	G	.	G/G	.	G/G	G/G	T/T	G/G	G/G	T/G	G/G	G/G	T/T	T/T	G/G	G/G	G/G	G/G	G/G	.	G/G	T/T	G/G	G/G	T/T	G/G	.	G/G	G/G	G/G	G/G	G/G	G/G	G/G	G/G	G/G	G/G	G/G	.	.	G/G	.	G/G	G/G	G/G	T/T
Pv07	2672043	ANNZ01020081-1_41253	C	A	.	C/C	.	A/A	C/C	C/C	C/C	C/C	C/C	C/C	C/C	C/C	C/C	C/C	C/C	A/A	A/A	C/C	C/C	C/C	C/C	C/C	C/C	C/C	C/C	.	A/A	C/C	A/A	C/C	A/A	C/C	C/C	C/C	C/C	A/A	C/C	.	.	C/C	A/A	C/C	A/A	C/C	C/C
Pv07	2914466	ANNZ01020087-1_8572	T	C	.	C/C	T/T	C/C	C/C	T/T	T/T	C/C	T/T	T/T	T/T	T/T	T/T	T/T	T/T	C/C	C/C	C/C	C/C	T/T	T/T	T/T	T/T	T/T	T/T	T/T	C/C	T/T	C/C	T/T	C/C	T/T	T/T	T/T	T/T	T/C	T/T	T/T	T/T	C/C	C/C	T/T	C/C	T/T	T/T
Pv07	3054435	ANNZ01020093-1_4382	T	C	.	C/C	.	C/C	T/T	T/T	T/T	C/C	T/T	T/T	T/T	T/T	T/T	T/T	C/C	C/C	C/C	C/C	C/C	T/T	T/T	T/T	T/T	T/T	T/T	.	C/C	C/C	C/C	T/T	C/C	T/T	T/T	T/T	C/C	T/C	C/C	T/C	.	C/C	C/C	T/T	C/C	T/T	T/T
Pv07	3380046	ANNZ01020107-1_7803	C	T	.	.	.	.	.	C/C	C/C	C/T	C/C	C/C	C/C	C/C	C/C	C/C	.	.	C/T	.	.	C/C	C/C	C/C	C/C	C/C	C/C	.	T/T	.	T/T	C/C	T/T	C/C	C/C	C/C	.	C/C	.	.	.	T/T	C/T	C/C	C/T	C/C	C/C
Pv07	3466183	ANNZ01020107-1_94000	T	C	.	T/T	T/T	T/T	C/C	T/T	T/T	C/C	T/T	T/T	T/T	T/T	T/T	T/T	C/C	T/T	C/C	C/C	C/C	T/T	T/T	T/T	T/T	T/T	T/T	T/T	C/C	C/C	C/C	T/T	C/C	T/T	T/T	T/T	C/C	T/C	C/C	T/T	T/T	C/C	C/C	T/T	C/C	T/T	T/T
Pv07	3648568	ANNZ01020109-1_84954	G	T	.	T/T	T/T	G/G	G/G	G/G	T/T	G/G	T/T	T/T	T/T	T/T	T/T	T/T	G/G	G/G	G/G	T/T	G/G	T/T	T/T	T/T	T/T	G/G	G/T	T/T	G/G	T/T	G/G	G/G	G/G	T/T	T/T	T/T	T/T	G/T	T/T	T/T	T/T	G/G	G/G	G/G	G/G	T/T	T/T
Pv07	3780517	ANNZ01020119-1_6792	G	A	.	G/G	.	G/G	G/G	A/A	A/A	G/G	A/A	A/A	A/A	A/A	A/A	A/A	G/G	G/G	G/G	G/G	G/G	A/A	A/A	A/A	A/A	G/G	A/A	.	G/G	G/G	G/G	A/A	G/G	A/A	A/A	A/A	G/G	G/A	G/G	.	.	G/G	G/G	A/A	G/G	A/A	A/A
Pv07	3898543	ANNZ01020123-1_13791	C	.	.	C/C	.	C/C	C/C	C/C	C/C	C/C	C/C	C/C	C/C	C/C	C/C	C/C	C/C	C/C	C/C	C/C	C/C	C/C	C/C	C/C	C/C	C/C	C/C	C/C	C/C	C/C	C/C	C/C	C/C	C/C	C/C	C/C	C/C	C/C	C/C	.	.	C/C	C/C	C/C	C/C	C/C	C/C
Pv07	3996411	ANNZ01020128-1_3247	C	T	.	.	.	.	C/C	C/C	C/C	C/C	C/C	C/C	C/C	C/C	T/T	C/C	C/C	.	C/C	.	.	C/C	C/T	C/C	C/C	C/C	C/T	.	C/C	C/C	C/C	C/C	C/C	C/C	C/C	C/C	C/C	C/C	C/C	.	.	C/C	C/C	C/C	C/C	C/C	C/C
Pv07	4096482	ANNZ01020130-1_69182	A	G	.	A/A	A/A	G/G	A/A	A/A	A/A	G/G	A/A	A/A	A/A	A/A	A/A	A/A	G/G	G/G	G/G	G/G	G/G	A/A	A/A	A/A	A/A	A/A	A/A	A/A	A/A	G/G	A/A	A/A	A/A	A/A	A/A	A/A	G/G	A/G	G/G	A/A	A/A	G/G	A/A	A/A	A/A	A/A	A/A
Pv07	4196826	ANNZ01020133-1_70758	G	A	.	G/G	.	A/A	A/A	G/G	G/G	A/A	G/G	G/G	G/G	G/G	G/G	G/G	A/A	A/A	A/A	A/A	A/A	G/G	G/G	G/G	G/G	G/G	G/G	.	A/A	A/A	A/A	G/G	A/A	G/G	G/G	G/G	A/A	G/A	A/A	.	.	A/A	A/A	G/G	A/A	G/G	G/G
Pv07	4277150	ANNZ01020135-1_22643	C	T	.	T/T	.	T/T	T/T	C/C	C/C	T/T	C/C	C/C	C/C	C/C	C/C	C/C	T/T	T/T	T/T	T/T	T/T	C/C	C/C	C/C	C/C	C/C	C/C	.	T/T	T/T	T/T	C/C	T/T	C/C	C/C	C/C	T/T	C/T	T/T	.	.	T/T	T/T	C/C	T/T	C/C	C/C
Pv07	4317380	ANNZ01020135-1_62873	C	T	.	C/C	.	C/C	T/T	C/C	C/C	T/T	C/C	C/C	C/C	C/C	C/C	C/C	T/T	C/C	T/T	T/T	T/T	C/C	C/C	C/C	C/C	C/C	C/C	.	T/T	T/T	C/C	C/C	T/T	C/C	C/C	C/C	T/T	C/T	T/T	.	.	T/T	C/C	C/C	T/T	C/C	C/C
Pv07	4594627	ANNZ01020145-1_16613	G	A	.	G/G	.	G/G	G/G	G/G	G/G	G/G	G/G	G/G	G/G	G/G	G/G	G/G	G/G	G/G	G/G	G/G	G/G	G/G	G/G	G/G	G/G	G/G	G/G	.	G/G	A/A	G/G	G/G	G/G	G/G	G/G	G/G	G/G	G/G	A/A	.	.	G/G	G/G	G/G	G/G	G/G	G/G
Pv07	4625426	ANNZ01020147-1_1767	G	A	.	A/A	.	G/G	A/A	G/G	G/G	A/A	G/G	G/G	G/G	G/G	G/G	G/G	A/A	G/G	A/A	A/A	G/A	G/G	G/G	G/G	G/G	G/G	G/G	.	A/A	G/G	G/G	G/G	A/A	G/G	G/G	G/G	G/A	G/G	G/G	.	.	A/A	G/G	G/G	A/A	G/G	G/G
Pv07	4742187	ANNZ01020151-1_2054	A	G	.	A/A	G/G	G/G	A/A	A/A	A/A	A/A	A/A	A/A	A/A	A/A	A/A	A/A	A/A	G/G	A/A	A/A	A/A	A/A	A/A	A/A	A/A	A/A	A/A	G/G	A/A	G/G	G/G	A/A	A/A	A/A	A/A	A/A	G/G	A/A	G/G	G/G	G/G	A/A	G/G	A/A	A/A	A/A	A/A
Pv07	5986657	ANNZ01020213-1_1074	C	T	.	T/T	.	T/T	T/T	C/C	C/C	T/T	C/C	C/C	C/C	C/C	C/C	C/C	T/T	T/T	T/T	T/T	T/T	C/C	C/C	C/C	C/C	C/C	C/C	C/T	T/T	T/T	T/T	C/C	T/T	C/C	C/C	C/C	C/C	C/C	T/T	.	.	T/T	T/T	C/C	T/T	C/C	C/C
Pv07	6043782	ANNZ01020214-1_20686	G	A	.	A/A	G/G	A/A	A/A	G/G	G/G	A/A	G/G	G/G	G/G	G/G	G/G	G/G	A/A	A/A	A/A	A/A	A/A	G/G	G/G	G/G	G/G	G/G	G/G	G/G	A/A	A/A	A/A	G/G	A/A	G/G	G/G	G/G	G/G	G/G	A/A	G/G	G/G	A/A	A/A	G/G	A/A	G/G	G/G
Pv07	6194175	ANNZ01020223-1_13453	A	C	.	C/C	.	C/C	C/C	A/A	A/A	C/C	A/A	A/A	A/A	A/A	A/A	A/A	C/C	C/C	C/C	C/C	C/C	A/A	A/A	A/A	A/A	A/A	A/A	.	C/C	C/C	C/C	A/A	C/C	A/A	A/A	A/A	A/A	A/A	C/C	.	.	C/C	C/C	A/A	C/C	A/A	A/A
Pv07	6384905	ANNZ01020225-1_40271	C	T	.	C/C	.	C/C	T/T	C/C	C/C	C/C	C/C	C/C	C/C	C/C	C/C	C/C	T/T	C/C	T/T	C/C	C/C	C/C	C/C	C/C	C/C	C/C	C/C	.	T/T	T/T	T/T	C/C	T/T	C/C	C/C	C/C	C/C	C/C	T/T	.	.	C/C	T/T	C/C	T/T	C/C	C/C
Pv07	6926390	ANNZ01020249-1_12107	C	A	.	C/C	.	A/A	A/A	C/C	C/C	A/A	C/C	C/C	C/C	C/C	C/C	C/C	A/A	A/A	A/A	A/A	A/A	C/C	C/C	C/C	C/C	C/C	C/C	.	A/A	A/A	A/A	C/C	A/A	C/C	C/C	C/C	C/C	C/C	A/A	.	.	A/A	A/A	C/C	A/A	C/C	C/C
Pv07	7065640	ANNZ01020259-1_18917	G	A	.	G/G	.	G/G	A/A	G/G	G/G	G/G	G/G	G/G	G/G	G/G	G/G	G/G	A/A	G/G	A/A	A/A	G/G	G/G	G/G	G/G	G/G	G/G	G/G	.	A/A	A/A	A/A	G/G	A/A	G/G	G/G	G/G	G/G	G/G	A/A	.	.	G/G	A/A	G/G	A/A	G/G	G/G
Pv07	7157210	ANNZ01020267-1_42097	G	A	.	.	.	G/G	G/G	A/A	A/A	G/G	A/A	A/A	A/A	A/A	A/A	A/A	G/G	G/G	G/G	G/G	G/G	A/A	A/A	A/A	A/A	G/G	A/A	.	G/G	G/G	G/G	A/A	G/G	A/A	A/A	G/G	A/A	G/G	G/G	.	.	G/G	G/G	A/A	G/G	A/A	A/A
Pv07	7244483	ANNZ01020281-1_13152	C	T	.	C/C	.	C/C	C/C	T/T	T/T	C/C	C/T	C/C	T/T	C/C	T/T	C/C	C/C	C/C	C/C	C/C	C/C	T/T	T/T	T/T	T/T	C/C	T/T	.	C/C	C/C	C/C	T/T	C/C	T/T	T/T	C/C	C/C	C/C	C/C	.	.	C/C	C/C	T/T	C/C	T/T	T/T
Pv07	7406552	ANNZ01020289-1_7611	T	G	.	G/G	.	G/G	G/G	T/T	T/T	G/G	T/T	G/G	T/T	G/G	T/T	G/G	G/G	G/G	G/G	G/G	G/G	T/T	T/G	T/T	T/T	G/G	T/T	.	G/G	G/G	G/G	T/T	G/G	T/T	T/T	G/G	G/G	G/G	G/G	.	.	G/G	G/G	T/T	G/G	T/T	T/T
Pv07	7759866	ANNZ01020302-1_62882	C	T	.	C/C	T/T	T/T	T/T	C/C	C/C	T/T	C/C	C/C	C/C	C/C	C/C	C/C	T/T	T/T	T/T	C/C	C/C	C/C	C/C	C/C	C/C	C/C	C/C	T/T	T/T	T/T	T/T	C/C	T/T	C/C	C/C	C/C	C/C	C/C	T/T	T/T	T/T	T/T	T/T	C/C	T/T	C/C	C/C
Pv07	8056052	ANNZ01020327-1_2366	T	.	.	.	.	.	.	T/T	T/T	.	T/T	T/T	T/T	T/T	T/T	T/T	.	.	.	.	.	T/T	T/T	T/T	T/T	T/T	T/T	.	.	.	.	T/T	.	T/T	T/T	T/T	T/T	T/T	.	.	.	.	.	T/T	.	T/T	T/T
Pv07	8396541	ANNZ01020340-1_23242	G	A	.	.	.	.	.	.	.	.	.	.	.	.	.	.	.	.	.	.	.	.	.	.	.	.	.	.	.	.	.	.	.	A/A	.	.	.	.	.	.	.	.	.	.	.	.	.
Pv07	8439266	ANNZ01020341-1_19571	C	T	.	T/T	.	T/T	T/T	C/C	C/C	T/T	C/C	C/C	C/C	C/C	C/C	C/C	T/T	T/T	T/T	C/C	T/T	C/C	C/C	C/C	C/C	C/C	C/C	.	T/T	T/T	T/T	C/C	T/T	C/C	C/C	C/C	C/C	C/C	T/T	.	.	T/T	T/T	C/C	T/T	C/C	C/C
Pv07	9104167	ANNZ01020375-1_21021	G	T	.	T/T	T/T	T/T	T/T	G/G	G/G	T/T	G/G	G/G	G/G	G/G	G/G	G/G	T/T	T/T	T/T	G/G	T/T	G/G	G/G	G/G	G/G	G/G	G/G	T/T	T/T	T/T	T/T	G/G	T/T	G/G	G/G	G/G	G/G	G/G	T/T	T/T	T/T	T/T	T/T	G/G	T/T	G/G	G/G
Pv07	9291437	ANNZ01020380-1_18025	A	C	.	C/C	.	C/C	C/C	A/A	A/A	A/A	A/A	A/A	A/A	A/A	A/A	A/A	C/C	C/C	C/C	A/A	A/A	A/A	A/A	A/A	A/A	A/A	A/A	.	C/C	C/C	C/C	A/A	C/C	A/A	A/A	A/A	A/A	A/A	C/C	.	.	C/C	C/C	A/A	C/C	A/A	A/A
Pv07	9338719	ANNZ01020380-1_65367	T	G	.	G/G	G/G	G/G	G/G	T/T	T/T	T/T	T/T	T/T	T/T	T/T	T/T	T/T	G/G	G/G	G/G	T/T	T/T	T/T	T/T	T/T	T/T	T/T	T/T	G/G	G/G	G/G	G/G	T/T	G/G	T/T	T/T	T/T	T/T	T/T	G/G	G/G	G/G	G/G	G/G	T/T	G/G	T/T	T/T
Pv07	9453581	ANNZ01020383-1_21291	C	T	.	T/T	.	T/T	T/T	C/C	C/C	T/T	C/C	C/C	C/C	C/C	C/C	C/C	T/T	T/T	T/T	T/T	T/T	C/C	C/C	C/C	C/C	C/C	C/C	.	T/T	T/T	T/T	C/C	T/T	C/C	C/C	C/C	C/C	C/C	T/T	.	.	T/T	T/T	C/C	T/T	C/C	C/C
Pv07	9751807	ANNZ01020398-1_8696	C	T	.	T/T	.	T/T	T/T	C/C	C/C	T/T	C/C	C/C	C/C	C/C	C/C	C/C	T/T	T/T	T/T	T/T	T/T	C/C	C/C	C/C	C/C	C/C	C/C	.	T/T	T/T	T/T	C/C	T/T	C/C	C/C	C/C	C/C	C/C	T/T	.	.	T/T	T/T	C/C	T/T	C/C	C/C
Pv07	10052105	ANNZ01020407-1_12734	G	A	.	A/A	.	A/A	A/A	G/G	G/G	A/A	G/G	G/G	G/G	G/G	G/G	G/G	A/A	A/A	A/A	A/A	A/A	G/G	G/G	G/G	G/G	G/G	G/G	.	A/A	A/A	A/A	G/G	A/A	G/G	G/G	G/G	G/G	G/G	A/A	.	.	A/A	A/A	G/G	A/A	G/G	G/G
Pv07	10154774	ANNZ01020414-1_22100	C	.	.	C/C	.	C/C	C/C	C/C	C/C	C/C	C/C	C/C	C/C	C/C	C/C	C/C	C/C	C/C	C/C	C/C	C/C	C/C	C/C	C/C	C/C	C/C	C/C	.	C/C	C/C	C/C	C/C	C/C	C/C	C/C	C/C	C/C	C/C	C/C	.	.	C/C	C/C	C/C	C/C	C/C	C/C
Pv07	10329304	ANNZ01020430-1_10903	G	A	.	A/A	G/G	A/A	A/A	G/G	G/G	A/A	G/G	G/G	G/G	G/G	G/G	G/G	A/A	A/A	A/A	A/A	A/A	G/G	G/G	G/G	G/G	G/G	G/G	G/G	A/A	A/A	A/A	G/G	A/A	G/G	G/G	G/G	G/G	G/G	A/A	G/G	G/G	A/A	A/A	G/G	A/A	G/G	G/G
Pv07	10542709	ANNZ01020441-1_61849	C	T	.	C/C	.	C/C	C/C	C/C	C/C	C/C	C/C	C/T	C/C	C/C	C/C	C/C	C/C	C/C	C/C	C/C	C/C	C/C	C/C	C/C	C/C	C/C	C/C	.	C/C	C/C	C/C	C/C	C/C	C/C	T/T	C/C	T/T	C/C	C/C	.	.	C/C	C/C	C/C	C/C	C/C	C/C
Pv07	10692735	ANNZ01020443-1_16147	C	T	.	.	.	C/C	.	C/C	C/C	C/C	C/C	C/C	C/C	C/C	C/C	C/C	.	C/C	C/T	.	.	C/C	C/C	C/C	C/C	C/C	C/C	.	C/T	C/T	T/T	C/C	.	C/C	C/C	C/C	C/C	C/C	.	.	.	C/C	.	C/C	C/T	C/C	C/C
Pv07	10750606	ANNZ01020444-1_17945	A	C	.	C/C	.	A/A	C/C	A/A	A/A	A/A	A/A	A/A	A/A	A/A	A/A	A/A	C/C	A/A	C/C	C/C	C/C	A/A	A/A	A/A	A/A	A/A	A/A	.	C/C	C/C	C/C	A/A	C/C	A/A	A/A	A/A	A/A	A/A	C/C	.	.	A/A	C/C	A/A	C/C	A/A	A/A
Pv07	10832226	ANNZ01020452-1_49094	G	A	.	A/A	.	G/G	A/A	G/G	G/G	G/G	G/G	G/G	G/G	G/G	G/G	G/G	A/A	G/G	A/A	A/A	A/A	G/G	G/G	G/G	G/G	G/G	G/G	.	A/A	A/A	A/A	G/G	A/A	G/G	G/G	G/G	G/G	G/G	A/A	.	.	G/G	A/A	G/G	A/A	G/G	G/G
Pv07	11061315	ANNZ01020465-1_6904	G	A	.	G/G	.	G/G	G/G	G/G	G/G	G/G	G/G	G/A	G/G	G/G	G/G	G/G	G/G	G/G	G/G	G/G	G/G	G/G	G/G	G/G	A/A	G/G	G/G	.	G/G	G/G	G/G	G/G	G/G	G/G	A/A	G/G	A/A	G/G	G/G	.	.	G/G	G/G	G/G	G/G	G/G	G/G
Pv07	11251772	ANNZ01020475-1_51052	G	.	.	.	.	.	.	.	G/G	.	G/G	G/G	G/G	G/G	G/G	G/G	.	.	.	.	.	G/G	G/G	G/G	G/G	.	G/G	.	.	.	.	G/G	.	G/G	G/G	G/G	G/G	G/G	.	.	.	.	.	G/G	.	G/G	G/G
Pv07	11388741	ANNZ01020485-1_15828	T	C	.	C/C	T/T	C/C	C/C	T/T	T/T	C/C	T/T	T/T	T/T	T/T	T/T	T/T	C/C	C/C	C/C	C/C	C/C	T/T	T/T	T/T	T/T	T/T	T/T	T/T	C/C	C/C	C/C	T/T	C/C	T/T	T/T	T/T	T/T	T/T	C/C	T/T	T/T	C/C	C/C	T/T	C/C	T/T	T/T
Pv07	11587922	ANNZ01020497-1_1675	G	T	.	T/T	.	T/T	T/T	G/G	G/G	G/G	G/G	G/G	G/G	G/G	G/G	G/G	T/T	T/T	T/T	T/T	T/T	G/G	G/G	G/G	G/G	G/G	G/G	.	T/T	T/T	T/T	G/G	T/T	G/G	G/G	G/G	G/G	G/G	T/T	.	.	T/T	T/T	G/G	T/T	G/G	G/G
Pv07	11939824	ANNZ01020518-1_74472	C	T	.	T/T	C/C	C/C	C/C	C/C	C/C	C/C	C/C	C/C	C/C	C/C	C/C	C/C	C/C	C/C	C/C	C/C	C/C	C/C	C/C	C/C	C/C	C/C	C/C	C/C	C/C	C/C	C/C	C/C	C/C	C/C	C/C	C/C	C/C	C/C	C/C	C/C	C/C	C/C	C/C	C/C	C/C	C/C	C/C
Pv07	12014890	ANNZ01020521-1_25121	C	A	.	A/A	.	C/C	C/C	C/C	C/C	C/C	C/C	C/C	C/C	C/C	C/C	C/C	C/C	C/C	C/C	C/C	C/C	C/C	C/C	C/C	C/C	C/C	C/C	.	C/C	C/C	C/C	C/C	C/C	C/C	C/C	C/C	C/C	C/C	C/C	.	.	C/C	C/C	C/C	C/C	C/C	C/C
Pv07	12261154	ANNZ01020540-1_23824	A	G	.	G/G	.	A/A	A/A	A/A	A/A	G/G	A/A	A/A	A/A	A/A	A/A	A/A	A/A	A/A	A/A	A/A	A/A	A/A	A/A	A/A	A/A	A/A	A/A	A/G	A/A	A/A	A/A	A/A	A/A	A/A	A/A	A/A	A/A	A/A	A/A	.	A/G	A/A	A/A	A/A	A/A	A/A	A/A
Pv07	12529712	ANNZ01020560-1_13287	C	T	.	T/T	C/C	C/C	C/C	C/C	C/C	T/T	C/C	C/C	C/C	C/C	C/C	C/C	C/C	C/C	C/C	C/C	C/C	C/C	C/C	C/C	C/C	C/C	C/C	C/C	C/C	C/C	C/C	C/C	C/C	C/C	C/C	C/C	C/C	C/C	C/C	C/C	C/C	C/C	C/C	C/C	C/C	C/C	C/C
Pv07	13046190	ANNZ01020601-1_75307	C	T	.	T/T	.	C/C	C/C	C/C	C/C	T/T	C/C	C/C	C/C	C/C	C/C	C/C	C/C	C/C	C/C	C/C	C/C	C/C	C/C	C/C	C/C	C/C	C/C	.	C/C	C/C	C/C	C/C	C/C	C/C	C/C	C/C	C/C	C/C	C/C	.	.	C/C	C/C	C/C	C/C	C/C	C/C
Pv07	13283213	ANNZ01020622-1_5997	G	A	.	G/G	.	G/G	G/G	G/G	G/G	G/G	G/G	G/A	G/G	G/G	G/G	G/G	G/G	G/G	G/G	G/G	G/G	G/G	G/G	G/G	A/A	G/G	G/G	.	G/G	G/G	G/G	G/G	G/G	G/G	A/A	G/G	A/A	G/G	G/G	.	.	G/G	G/G	G/G	G/G	G/G	G/G
Pv07	13425612	ANNZ01020637-1_6915	C	T	.	C/C	.	C/C	C/C	C/C	C/C	C/C	C/C	C/T	C/C	C/C	C/C	C/C	C/C	C/C	C/C	C/C	C/C	C/C	C/C	C/C	T/T	C/C	C/C	.	C/C	C/C	C/C	C/C	C/C	C/C	T/T	C/C	T/T	C/C	C/C	.	.	C/C	C/C	C/C	C/C	C/C	C/C
Pv07	13656648	ANNZ01020653-1_5454	A	G	.	G/G	.	G/G	G/G	A/A	A/A	G/G	A/A	A/A	A/A	A/A	A/A	A/A	G/G	G/G	G/G	G/G	G/G	A/A	A/A	A/A	A/A	A/A	A/A	.	G/G	G/G	G/G	A/A	G/G	A/A	A/A	A/A	A/A	A/A	G/G	.	.	G/G	G/G	A/A	G/G	A/A	A/A
Pv07	14034383	ANNZ01020675-1_73806	A	G	.	G/G	.	G/G	G/G	A/A	A/A	G/G	A/A	A/A	A/A	A/A	A/A	A/A	G/G	G/G	G/G	G/G	G/G	A/A	A/A	A/A	A/A	A/A	A/A	.	G/G	G/G	G/G	A/A	G/G	A/A	A/A	A/A	A/A	A/A	G/G	.	.	G/G	G/G	A/A	G/G	A/A	A/A
Pv07	14272971	ANNZ01020680-1_5025	C	T	.	T/T	.	T/T	T/T	C/C	C/C	C/C	C/C	C/C	C/C	C/C	C/C	C/C	T/T	T/T	T/T	C/C	C/C	C/C	C/C	C/C	C/C	C/C	C/C	.	T/T	T/T	T/T	C/C	T/T	C/C	C/C	C/C	C/C	C/C	T/T	.	.	T/T	T/T	C/C	T/T	C/C	C/C
Pv07	14359675	ANNZ01020681-1_84356	G	T	.	T/T	G/G	T/T	T/T	G/G	G/G	T/T	G/G	G/G	G/G	G/G	G/G	G/G	T/T	T/T	T/T	T/T	T/T	G/G	G/G	G/G	G/G	G/G	G/G	G/G	T/T	T/T	T/T	G/G	T/T	G/G	G/G	G/G	G/G	G/G	T/T	G/G	G/G	T/T	T/T	G/G	T/T	G/G	G/G
Pv07	14455236	ANNZ01020683-1_23214	T	C	.	T/T	.	T/T	T/T	T/T	T/T	T/T	T/T	T/T	T/T	T/T	T/T	T/T	T/T	T/T	T/T	T/T	T/T	T/T	T/T	T/T	T/T	T/T	T/T	.	T/T	T/T	T/T	T/T	T/T	T/T	T/T	T/T	T/T	T/T	T/T	.	.	T/T	T/T	T/T	T/T	T/T	T/T
Pv07	14984535	ANNZ01020736-1_7735	A	G	.	G/G	.	G/G	G/G	A/A	A/A	G/G	A/A	A/A	A/A	A/A	A/A	A/A	G/G	G/G	G/G	G/G	G/G	A/A	A/A	A/A	A/A	A/A	A/A	.	G/G	G/G	G/G	A/A	G/G	A/A	A/A	A/A	A/A	A/A	G/G	.	.	G/G	G/G	A/A	G/G	A/A	A/A
Pv07	15021738	ANNZ01020737-1_15124	A	G	.	G/G	.	G/G	G/G	A/A	A/A	G/G	A/A	A/A	A/A	A/A	A/A	A/A	G/G	G/G	G/G	G/G	G/G	A/A	A/A	A/A	A/A	A/A	A/A	.	G/G	G/G	G/G	A/A	G/G	A/A	A/A	A/A	A/A	A/A	G/G	.	.	G/G	G/G	A/A	G/G	A/A	A/A
Pv07	15290470	ANNZ01020767-1_14407	G	A	.	A/A	.	A/A	A/A	G/G	G/G	A/A	G/G	G/G	G/G	G/G	G/G	G/G	A/A	A/A	A/A	A/A	A/A	G/G	G/G	G/G	G/G	G/G	G/G	G/A	A/A	A/A	A/A	G/G	A/A	G/G	G/G	G/G	G/G	G/G	A/A	.	.	A/A	A/A	G/G	A/A	G/G	G/G
Pv07	15316545	ANNZ01020767-1_40482	C	T	.	T/T	.	T/T	T/T	C/C	C/C	T/T	C/C	C/C	C/C	C/C	C/C	C/C	T/T	T/T	T/T	T/T	T/T	C/C	C/C	C/C	C/C	C/C	C/C	.	T/T	T/T	T/T	C/C	T/T	C/C	C/C	C/C	C/C	C/C	T/T	.	.	T/T	T/T	C/C	T/T	C/C	C/C
Pv07	15552930	ANNZ01020792-1_22566	T	C	.	T/T	T/T	T/T	T/T	T/T	T/T	T/T	T/T	T/C	T/T	T/T	T/T	T/T	T/T	T/T	T/T	T/T	T/T	T/T	T/C	T/T	C/C	T/T	T/T	T/T	T/T	T/T	T/T	T/T	T/T	T/T	C/C	T/T	C/C	T/T	T/T	T/T	T/T	T/T	T/T	T/T	T/T	T/T	T/T
Pv07	34595626	ANNZ01023308-1_36358	A	G	.	A/A	A/A	A/A	G/G	A/A	A/A	A/A	A/A	A/A	A/A	A/A	A/A	A/A	G/G	A/A	G/G	G/G	G/G	A/A	A/A	A/A	A/A	A/A	A/A	A/A	G/G	G/G	G/G	A/A	G/G	A/A	A/A	A/A	A/A	A/A	G/G	A/A	A/A	A/A	G/G	A/A	G/G	A/A	A/A
Pv07	36470060	ANNZ01023424-1_26870	G	A	.	G/G	.	G/G	A/A	G/G	G/G	A/A	G/G	G/G	G/G	G/G	G/G	G/G	A/A	G/G	A/A	G/G	G/G	G/G	G/G	G/G	G/G	G/G	G/G	G/A	A/A	A/A	A/A	G/G	A/A	G/G	G/G	G/G	G/G	G/G	A/A	.	.	G/G	A/A	G/G	A/A	G/G	G/G
Pv07	40059610	ANNZ01023611-1_8180	T	C	.	T/T	.	T/T	T/T	C/C	C/C	T/T	C/C	C/C	C/C	C/C	C/C	C/C	C/C	C/C	T/T	C/C	C/C	C/C	C/C	C/C	C/C	C/C	C/C	C/C	T/T	T/T	T/T	C/C	T/T	C/C	C/C	C/C	C/C	C/C	T/T	.	C/C	C/C	T/T	C/C	T/T	C/C	C/C
Pv07	41802076	ANNZ01023688-1_45300	A	C	.	A/A	.	C/C	C/C	A/A	A/A	A/A	A/A	A/A	A/A	A/A	A/A	A/A	C/C	A/A	C/C	A/A	A/A	A/A	A/A	A/A	A/A	A/A	A/A	.	C/C	C/C	C/C	A/A	C/C	A/A	A/A	A/A	A/A	A/A	C/C	.	.	A/A	C/C	A/A	C/C	A/A	A/A
Pv07	43707015	ANNZ01023778-1_844	A	G	.	A/A	.	A/A	A/A	.	.	.	A/A	A/A	.	.	A/A	A/A	A/A	A/A	A/A	A/A	.	A/A	A/A	A/A	.	.	A/A	.	A/A	G/G	G/G	.	A/A	A/A	.	.	.	.	.	.	.	.	.	.	.	.	A/A
Pv07	43971691	ANNZ01023783-1_42357	C	T	.	C/C	C/C	C/C	T/T	C/C	C/C	C/C	C/C	C/C	C/C	C/C	C/C	C/C	C/C	C/C	T/T	C/C	C/C	C/C	C/C	C/C	C/C	C/C	C/C	C/C	C/C	T/T	T/T	C/C	C/C	C/C	C/C	C/C	C/C	C/C	T/T	C/C	C/C	C/C	T/T	C/C	C/C	C/C	C/C
Pv07	44212377	ANNZ01023788-1_14926	C	T	.	T/T	C/C	C/C	C/C	C/C	C/C	C/C	C/C	C/C	C/C	C/C	C/C	C/C	T/T	C/C	C/C	C/C	C/C	C/C	C/C	C/C	C/C	C/C	C/C	C/C	T/T	T/T	C/C	C/C	C/C	C/C	C/C	C/C	C/C	C/C	T/T	C/C	C/C	C/C	C/C	C/C	C/C	C/C	C/C
Pv07	44383338	ANNZ01023789-1_155054	A	C	.	C/C	C/C	A/A	A/A	A/A	A/A	A/A	A/A	A/A	A/A	A/A	A/A	A/A	A/A	A/A	A/A	A/A	A/A	A/A	A/A	A/A	A/A	A/A	A/A	C/C	A/A	C/C	A/A	A/A	A/A	A/A	A/A	A/A	A/A	A/A	C/C	C/C	A/C	A/A	A/A	A/A	A/A	A/A	A/A
Pv07	44627319	ANNZ01023798-1_65833	T	C	.	T/T	C/C	T/T	T/T	T/T	T/T	T/T	T/T	T/C	T/T	T/T	T/T	T/T	T/T	T/T	T/T	T/T	T/T	T/T	T/T	T/T	T/T	C/C	T/T	C/C	T/T	T/T	T/T	T/T	T/T	T/T	T/T	T/T	C/C	C/C	T/T	C/C	C/C	T/T	T/T	T/T	T/T	T/T	T/T
Pv07	46697119	ANNZ01023856-1_44172	C	T	.	C/C	.	C/C	T/T	C/C	C/C	C/T	C/C	C/C	C/C	C/C	C/C	C/C	C/T	T/T	C/C	.	.	C/C	C/C	C/C	C/C	C/C	C/C	.	T/T	T/T	.	C/C	C/C	C/C	C/C	C/C	C/C	C/C	.	.	.	C/T	.	C/C	.	C/C	C/C
Pv07	47306249	ANNZ01023895-1_2947	T	G	.	T/T	.	G/G	T/T	T/T	T/T	T/T	T/T	T/T	T/T	T/T	T/T	T/T	T/T	G/G	T/T	T/T	T/T	T/T	T/T	T/T	T/T	T/T	T/T	.	G/G	G/G	T/T	T/T	G/G	T/T	T/T	T/T	T/T	T/T	G/G	.	.	G/G	T/T	T/T	G/G	T/T	T/T
Pv07	47475525	ANNZ01023901-1_98000	C	A	.	C/C	C/C	A/A	C/C	C/C	C/C	C/C	C/C	C/C	C/C	C/C	C/C	C/C	C/C	C/C	C/C	C/C	C/C	C/C	C/C	C/C	C/C	C/C	C/C	C/C	A/A	A/A	C/C	C/C	A/A	C/C	C/C	C/C	C/C	C/C	A/A	C/C	C/C	C/C	C/C	C/C	A/A	C/C	C/C
Pv07	47577351	ANNZ01023907-1_44090	C	A	.	C/C	C/C	A/A	C/C	C/C	C/C	C/C	C/C	C/C	C/C	C/C	C/C	C/C	C/C	A/A	C/C	C/C	C/C	C/C	C/C	C/C	C/C	C/C	C/C	C/C	A/A	A/A	C/C	C/C	A/A	C/C	C/C	C/C	C/C	C/C	A/A	C/C	C/C	A/A	C/C	C/C	A/A	C/C	C/C
Pv07	47708893	ANNZ01023909-1_50327	G	A	.	G/G	G/G	G/G	A/A	G/G	G/G	G/G	G/G	G/G	G/G	G/G	G/G	G/G	A/A	A/A	G/G	G/G	G/G	G/G	G/G	G/G	G/G	G/G	G/G	G/G	A/A	A/A	G/G	G/G	A/A	G/G	G/G	G/G	G/G	G/G	A/A	G/G	G/G	A/A	G/G	G/G	G/G	G/G	G/G
Pv07	48635079	ANNZ01023938-1_14109	G	A	.	A/A	.	A/A	A/A	G/G	G/G	G/G	G/G	G/G	G/G	G/G	G/G	G/G	G/G	G/G	A/A	G/G	G/G	G/G	G/G	G/G	G/A	G/G	G/G	.	G/G	A/A	G/G	G/G	A/A	G/G	G/G	G/G	G/G	A/A	A/A	.	.	G/G	G/G	G/G	A/A	G/G	G/G
Pv07	49371793	ANNZ01023956-1_35735	C	A	.	C/C	.	A/A	A/A	C/C	C/C	A/A	C/A	A/A	C/C	C/C	A/A	C/C	A/A	A/A	A/A	A/A	A/A	A/A	C/A	C/C	C/C	C/C	A/A	C/A	A/A	A/A	A/A	C/C	A/A	A/A	A/A	C/C	C/C	C/C	A/A	.	.	A/A	A/A	C/C	A/A	A/A	A/A
Pv07	49417284	ANNZ01023958-1_16453	T	G	.	T/T	T/T	G/G	G/G	T/T	T/T	G/G	T/T	T/T	T/T	T/T	G/G	T/T	G/G	G/G	G/G	G/G	G/G	T/T	T/T	T/T	T/T	T/T	G/G	T/T	G/G	G/G	G/G	T/T	G/G	T/T	T/T	T/T	T/T	T/T	G/G	T/T	T/T	G/G	G/G	T/T	G/G	T/T	G/G
Pv07	49437430	ANNZ01023958-1_36599	T	G	.	G/G	G/G	G/G	G/G	T/T	T/T	G/G	T/T	T/T	T/T	T/T	G/G	T/T	G/G	G/G	G/G	G/G	G/G	T/T	T/T	T/T	T/T	T/T	G/G	G/G	G/G	G/G	G/G	T/T	G/G	T/T	T/T	T/T	T/T	T/T	G/G	G/G	G/G	G/G	G/G	T/T	G/G	T/T	G/G
Pv07	49632587	ANNZ01023963-1_49439	T	G	.	T/T	T/G	T/T	T/T	T/T	T/T	T/T	T/G	G/G	T/T	T/T	T/T	T/T	T/T	T/T	T/T	G/G	G/G	G/G	T/G	T/T	T/T	T/T	T/T	T/G	T/T	T/T	T/T	T/T	T/T	G/G	G/G	T/T	T/T	T/T	T/T	T/G	T/G	T/T	T/T	T/T	T/T	G/G	T/T
Pv07	50750715	ANNZ01023989-1_102789	C	T	.	T/T	.	T/T	T/T	C/C	T/T	T/T	C/T	C/T	T/T	C/C	T/T	C/C	T/T	T/T	T/T	C/C	C/C	T/T	C/T	T/T	T/T	T/T	T/T	.	T/T	T/T	T/T	T/T	T/T	C/C	C/C	T/T	C/C	T/T	T/T	.	.	T/T	T/T	C/C	T/T	C/C	T/T
Pv07	51176324	ANNZ01024002-1_29638	T	G	.	G/G	T/T	T/T	T/T	T/T	.	T/T	.	T/T	T/T	T/T	T/T	T/T	.	T/T	T/T	.	.	T/T	T/T	T/T	T/T	G/G	T/T	.	.	T/T	T/T	T/T	T/T	T/T	.	.	T/T	T/T	.	.	T/T	T/T	.	T/T	T/T	T/T	.
Pv08	176016	ANNZ01024031-1_50865	G	A	.	G/G	.	G/G	G/G	G/G	G/G	G/G	G/G	G/G	G/G	G/G	G/G	G/G	G/G	G/G	G/G	G/G	A/A	G/G	G/G	G/G	G/G	G/G	G/G	.	G/G	G/G	G/G	G/G	G/G	G/G	G/G	G/G	G/G	G/G	G/G	.	.	G/G	G/G	G/G	G/G	A/A	G/G
Pv08	392355	ANNZ01024035-1_69525	C	T	.	T/T	.	C/C	C/C	C/C	C/C	C/C	C/C	C/C	C/C	C/C	C/C	C/C	T/T	C/C	C/C	.	C/C	C/C	C/C	C/C	C/C	C/C	C/C	.	T/T	C/C	C/C	C/C	C/T	C/C	C/C	C/C	C/C	C/C	C/C	.	.	C/C	C/C	C/C	C/T	.	C/C
Pv08	497445	ANNZ01024037-1_56934	C	T	.	T/T	C/C	C/C	T/T	C/C	C/C	C/C	C/C	C/C	C/C	C/C	C/C	C/C	C/C	C/C	C/C	T/T	C/C	C/C	C/C	C/C	C/C	C/C	C/C	C/C	C/C	C/C	C/C	C/C	C/C	C/C	C/C	C/C	C/C	C/C	T/T	C/C	C/C	C/C	C/C	C/C	C/C	T/T	C/C
Pv08	569881	ANNZ01024041-1_27558	A	C	.	C/C	A/A	C/C	C/C	A/A	A/A	C/C	A/C	A/A	A/A	A/A	A/A	A/A	A/A	C/C	C/C	C/C	A/A	A/A	A/A	A/A	A/A	A/A	A/A	A/A	A/A	C/C	A/A	A/A	A/A	A/A	A/A	A/A	A/A	A/A	C/C	A/A	A/A	C/C	A/A	A/A	A/A	C/C	A/A
Pv08	636198	ANNZ01024043-1_357	A	C	.	.	.	A/A	A/A	A/A	A/A	A/A	A/A	A/A	A/A	A/A	A/A	A/A	.	A/A	A/A	A/A	A/A	A/A	A/A	A/A	A/A	A/A	A/A	.	.	A/A	A/A	A/A	A/A	A/A	A/A	A/A	A/A	A/A	A/A	.	.	A/A	A/A	A/A	A/A	A/A	A/A
Pv08	1112553	ANNZ01024053-1_20676	G	T	.	G/G	G/G	G/G	G/G	G/G	G/G	G/G	G/G	G/G	G/G	G/G	G/G	G/G	T/T	G/G	G/G	T/T	T/T	G/G	G/G	G/G	G/G	G/G	G/G	G/G	T/T	G/G	G/G	G/G	G/G	G/G	G/G	G/G	G/G	G/G	G/G	G/G	G/G	G/G	G/G	G/G	G/G	G/G	G/G
Pv08	1210512	ANNZ01024053-1_118635	G	A	.	A/A	.	A/A	G/A	G/G	G/G	G/A	G/G	G/G	G/G	G/G	G/G	G/G	.	G/A	A/A	.	.	G/G	G/G	G/G	G/G	G/G	G/G	.	A/A	A/A	A/A	G/G	G/A	G/G	G/G	G/G	G/G	G/G	G/A	.	.	A/A	.	G/G	G/A	G/G	G/G
Pv08	1476642	ANNZ01024060-1_1421	G	A	.	G/G	.	G/G	A/A	G/G	G/G	A/A	G/G	G/G	G/G	G/G	G/G	G/G	G/G	A/A	A/A	G/G	G/G	G/G	G/G	G/G	G/G	G/G	G/G	.	G/G	A/A	G/G	G/G	G/G	G/G	G/G	G/G	G/G	G/G	A/A	.	.	A/A	G/G	G/G	G/G	G/G	G/G
Pv08	1590236	ANNZ01024061-1_34886	C	T	.	C/C	C/C	C/C	T/T	C/C	C/C	T/T	C/C	C/C	C/C	C/C	C/C	C/C	C/C	T/T	T/T	C/C	C/C	C/C	C/C	C/C	C/C	C/C	C/C	C/C	C/C	T/T	C/C	C/C	C/C	C/C	C/C	C/C	C/C	C/C	T/T	C/C	C/C	T/T	C/C	C/C	C/C	C/C	C/C
Pv08	1643898	ANNZ01024064-1_11275	C	A	.	C/C	C/A	C/C	A/A	C/C	C/C	A/A	C/C	C/C	C/C	C/C	C/C	C/C	A/A	A/A	A/A	C/C	C/C	C/C	C/C	C/C	C/C	C/C	C/C	C/C	A/A	A/A	C/C	C/C	C/C	C/C	C/C	C/C	C/C	C/C	A/A	C/A	C/C	A/A	C/C	C/C	C/C	C/C	C/C
Pv08	1768570	ANNZ01024065-1_25151	C	T	.	C/C	C/C	C/C	T/T	C/C	C/C	T/T	.	C/T	C/C	.	C/C	C/C	C/C	T/T	T/T	C/C	C/C	.	C/C	C/C	C/C	C/C	.	C/C	C/C	T/T	C/C	C/C	T/T	.	C/C	.	.	.	T/T	C/C	C/C	T/T	C/C	C/C	C/C	.	C/C
Pv08	1860951	ANNZ01024066-1_40317	G	T	.	T/T	T/T	G/G	G/G	G/G	G/G	G/G	G/G	G/G	G/G	G/G	G/G	G/G	T/T	G/G	G/G	T/T	T/T	G/G	G/G	G/G	G/G	T/T	G/G	T/T	T/T	G/G	G/G	G/G	G/G	G/G	G/G	G/G	G/G	G/G	G/G	T/T	T/T	G/G	G/G	G/G	G/G	G/G	T/T
Pv08	1936071	ANNZ01024067-1_23289	TT	TGT;GT	.	TT/TT	TGT/TGT	GT/GT	GT/GT	TT/TT	TT/TT	GT/GT	TT/TT	TT/TT	TT/TT	GT/GT	TT/TT	TT/TT	TT/TT	GT/GT	GT/GT	GT/GT	TT/TT	TT/TT	TT/TT	TT/TT	TT/TT	GT/GT	TT/TT	TGT/TGT	TT/TT	GT/GT	GT/GT	TT/TT	GT/GT	TT/TT	TT/TT	TT/TT	TT/TT	TT/TT	GT/GT	TGT/TGT	TGT/TGT	GT/GT	GT/GT	TT/TT	GT/GT	TT/TT	GT/GT
Pv08	2091646	ANNZ01024077-1_32115	A	G	.	A/A	.	A/A	A/A	A/A	A/A	A/A	A/A	A/A	A/A	A/A	A/A	A/A	A/A	A/A	A/A	A/A	A/A	A/A	A/A	A/A	A/A	A/A	A/A	.	A/A	A/A	A/A	A/A	A/A	A/A	A/A	A/A	A/A	A/A	A/A	.	.	A/A	A/A	A/A	A/A	A/A	A/A
Pv08	2120100	ANNZ01024077-1_60569	A	C	.	A/A	A/A	A/A	A/A	A/A	C/C	A/A	C/C	C/C	C/C	C/C	C/C	C/C	A/A	A/A	A/A	C/C	A/A	C/C	C/C	C/C	C/C	C/C	C/C	A/A	A/A	A/A	A/A	C/C	A/A	C/C	C/C	C/C	C/C	C/C	A/A	A/A	A/A	A/A	A/A	C/C	A/A	C/C	C/C
Pv08	2605598	ANNZ01024093-1_4843	G	A	.	A/A	A/A	G/G	G/G	G/G	G/G	G/G	G/G	G/G	G/G	G/G	G/G	G/G	G/G	G/G	G/G	A/A	A/A	G/G	G/G	G/G	G/G	G/G	G/G	A/A	G/G	G/G	A/A	G/G	G/G	G/G	G/G	G/G	G/G	G/G	G/G	A/A	A/A	G/G	A/A	G/G	G/G	G/G	G/G
Pv08	2746148	ANNZ01024100-1_61040	A	C	.	C/C	C/C	C/C	C/C	C/C	C/C	C/C	C/C	C/C	C/C	C/C	C/C	C/C	C/C	C/C	C/C	A/A	A/A	C/C	C/C	C/C	C/C	C/C	C/C	C/C	C/C	C/C	C/C	C/C	A/A	C/C	C/C	C/C	C/C	C/C	C/C	C/C	C/C	C/C	C/C	C/C	A/A	C/C	C/C
Pv08	2893560	ANNZ01024108-1_22460	T	C	.	C/C	.	C/C	C/C	T/T	T/T	C/C	T/T	T/C	T/T	T/T	T/T	T/T	T/T	T/T	C/C	T/T	T/T	T/T	T/T	T/T	T/T	T/T	T/T	.	C/C	T/T	T/T	T/T	T/T	T/T	T/T	T/T	T/T	T/T	C/C	.	.	T/T	T/T	T/T	T/T	T/T	T/T
Pv08	2973222	ANNZ01024111-1_33006	C	T	.	C/C	.	C/C	T/T	C/C	C/C	T/T	C/C	C/T	C/C	C/C	C/C	C/C	C/C	C/C	T/T	C/C	C/C	C/C	C/C	C/C	C/C	C/C	C/C	.	T/T	C/C	C/C	C/C	C/C	C/C	C/C	C/C	C/C	C/C	T/T	.	.	C/C	C/C	C/C	C/C	C/C	C/C
Pv08	3092821	ANNZ01024113-1_17850	C	A	.	C/C	C/C	C/C	A/A	C/C	C/C	A/A	C/C	C/A	C/C	C/C	C/C	C/C	C/C	A/A	A/A	C/C	C/C	C/C	C/C	C/C	C/C	C/C	C/C	C/C	A/A	A/A	A/A	C/C	C/C	C/C	C/C	C/C	C/C	C/C	A/A	C/C	C/C	A/A	A/A	C/C	C/C	C/C	C/C
Pv08	3197078	ANNZ01024116-1_6815	G	A	.	A/A	A/A	A/A	G/G	G/G	A/A	G/G	A/A	G/A	G/G	A/A	G/G	A/A	G/G	A/A	G/G	G/G	G/G	A/A	G/A	A/A	A/A	A/A	A/A	A/A	A/A	A/A	A/A	G/G	A/A	A/A	A/A	A/A	A/A	A/A	A/A	A/A	A/A	A/A	A/A	G/G	A/A	A/A	A/A
Pv08	3541649	ANNZ01024125-1_4225	T	G	.	T/T	T/T	G/G	G/G	T/T	T/T	G/G	T/T	T/G	T/T	T/T	T/T	T/T	T/T	G/G	G/G	G/G	G/G	T/T	T/T	T/T	T/T	T/T	T/T	T/T	G/G	G/G	G/G	T/T	G/G	T/T	T/T	T/T	T/T	T/T	G/G	T/T	T/T	G/G	G/G	T/T	G/G	T/T	T/T
Pv08	3989686	ANNZ01024140-1_69732	G	A	.	A/A	G/G	A/A	A/A	.	G/G	A/A	G/G	G/A	G/G	G/G	G/G	G/G	A/A	A/A	A/A	A/A	A/A	G/G	G/G	.	.	G/G	G/G	G/G	A/A	A/A	A/A	G/G	A/A	G/G	.	G/G	G/G	G/G	A/A	G/G	G/G	A/A	A/A	G/G	A/A	G/G	G/G
Pv08	4201220	ANNZ01024151-1_36775	A	G	.	G/G	.	G/G	G/G	A/A	A/A	G/G	A/A	A/G	A/A	A/A	A/A	A/A	G/G	G/G	G/G	G/G	G/G	A/A	A/A	A/A	A/A	A/A	A/A	.	G/G	G/G	G/G	A/A	G/G	A/A	A/A	A/A	A/A	A/A	G/G	.	.	G/G	G/G	A/A	G/G	A/A	A/A
Pv08	4426596	ANNZ01024159-1_2987	C	T	.	C/C	.	.	.	.	.	.	.	.	.	.	.	C/C	.	.	.	.	.	.	.	.	.	.	C/C	.	T/T	.	T/T	.	.	.	.	.	.	.	.	.	.	.	.	.	.	.	.
Pv08	4553675	ANNZ01024167-1_5970	T	C	.	C/C	T/T	C/C	C/C	T/T	T/T	C/C	T/T	T/C	T/T	T/T	T/T	T/T	C/C	C/C	C/C	C/C	C/C	T/T	T/T	T/T	T/T	T/T	T/T	T/T	C/C	C/C	C/C	T/T	C/C	T/T	T/T	T/T	T/T	C/C	C/C	T/T	T/T	C/C	C/C	T/T	C/C	T/T	T/T
Pv08	4743633	ANNZ01024174-1_1466	G	A	.	A/A	G/G	A/A	A/A	G/G	G/G	A/A	G/G	G/A	G/G	G/G	G/G	G/G	A/A	A/A	A/A	A/A	A/A	G/G	G/G	G/G	G/G	G/G	G/G	G/G	A/A	A/A	A/A	A/A	A/A	G/G	G/G	G/G	G/G	A/A	A/A	G/G	G/G	A/A	A/A	G/G	A/A	G/G	G/G
Pv08	4792400	ANNZ01024174-1_50233	A	G	.	G/G	G/G	G/G	G/G	A/A	A/A	G/G	A/A	A/G	A/A	A/A	A/A	A/A	G/G	G/G	G/G	G/G	G/G	A/A	A/A	A/A	A/A	A/A	A/A	G/G	G/G	G/G	G/G	G/G	G/G	A/A	A/A	A/A	A/A	G/G	G/G	G/G	G/G	G/G	G/G	A/A	G/G	A/A	A/A
Pv08	4874943	ANNZ01024182-1_13047	C	T	.	T/T	C/C	T/T	T/T	C/C	C/C	T/T	C/C	C/T	C/C	C/C	C/C	C/C	T/T	T/T	T/T	T/T	T/T	C/C	C/C	C/C	C/C	C/C	C/C	C/C	T/T	T/T	T/T	T/T	T/T	C/C	C/C	C/C	C/C	T/T	T/T	C/C	C/C	T/T	T/T	C/C	T/T	C/C	C/C
Pv08	4921773	ANNZ01024184-1_376	C	T	.	T/T	T/T	T/T	T/T	C/C	C/C	T/T	C/C	C/T	C/C	C/C	C/C	C/C	T/T	T/T	T/T	T/T	T/T	C/C	C/C	C/C	C/C	C/C	C/C	T/T	T/T	T/T	T/T	T/T	T/T	C/C	C/C	C/C	C/C	T/T	T/T	T/T	T/T	T/T	T/T	C/C	T/T	C/C	C/C
Pv08	5057881	ANNZ01024187-1_108910	G	A	.	A/A	A/A	A/A	A/A	G/G	G/G	A/A	G/G	G/A	G/G	G/G	G/G	G/G	A/A	A/A	A/A	A/A	A/A	G/G	G/G	G/G	G/G	G/G	G/G	A/A	A/A	A/A	A/A	A/A	A/A	G/G	G/G	G/G	G/G	A/A	A/A	A/A	A/A	A/A	A/A	G/G	A/A	G/G	G/G
Pv08	5117885	ANNZ01024189-1_7779	T	A;G	.	G/G	.	T/T	T/T	T/T	T/T	T/T	T/T	T/T	T/T	T/T	T/T	T/T	G/G	T/T	T/T	G/G	G/G	T/T	T/T	T/T	T/T	T/T	T/T	T/A	T/T	T/T	T/T	G/G	T/T	T/T	T/T	T/T	T/T	G/G	T/T	.	.	T/T	T/T	T/T	T/T	T/T	T/T
Pv08	5150678	ANNZ01024191-1_9914	C	A	.	A/A	A/A	A/A	A/A	C/C	C/C	A/A	C/C	C/A	C/C	C/C	C/C	C/C	A/A	A/A	A/A	C/C	C/C	C/C	C/C	C/C	C/C	C/C	C/C	A/A	A/A	A/A	A/A	A/A	A/A	C/C	C/C	C/C	C/C	C/C	A/A	A/A	A/A	A/A	A/A	C/C	A/A	C/C	C/C
Pv08	5235409	ANNZ01024192-1_73881	C	A	.	A/A	.	C/C	C/C	C/C	C/C	C/C	C/C	C/C	C/C	C/C	C/C	C/C	A/A	C/C	C/C	A/A	A/A	C/C	C/C	C/C	C/C	C/C	C/C	.	A/A	C/C	C/C	A/A	C/C	C/C	C/C	C/C	C/C	A/A	C/C	.	.	C/C	C/C	C/C	C/C	C/C	C/C
Pv08	5585116	ANNZ01024199-1_34765	G	A	.	A/A	A/A	G/G	G/G	G/G	G/G	G/G	G/G	G/G	G/G	G/G	G/G	G/G	A/A	G/G	G/G	A/A	A/A	G/G	G/G	G/G	G/G	G/G	G/G	A/A	G/G	G/G	G/G	A/A	G/G	G/G	G/G	G/G	G/G	A/A	G/G	A/A	A/A	G/G	G/G	G/G	G/G	G/G	G/G
Pv08	5670170	ANNZ01024202-1_1504	C	T	.	T/T	.	C/C	C/C	C/C	C/C	C/C	C/C	C/C	C/C	C/C	C/C	C/C	T/T	C/C	C/C	T/T	T/T	C/C	C/C	C/C	C/C	C/C	C/C	.	T/T	C/C	C/C	T/T	C/C	C/C	C/C	C/C	C/C	T/T	C/C	.	.	C/C	C/C	C/C	C/C	C/C	C/C
Pv08	5950229	ANNZ01024231-1_35493	T	C	.	C/C	T/T	T/T	T/T	T/T	T/T	T/T	T/T	T/T	T/T	T/T	T/T	T/T	C/C	T/T	T/T	C/C	C/C	T/T	T/T	T/T	T/T	T/T	T/T	T/T	C/C	T/T	T/T	C/C	T/T	T/T	T/T	T/T	T/T	C/C	T/T	T/T	T/T	T/T	T/T	T/T	T/T	T/T	T/T
Pv08	6217643	ANNZ01024239-1_33623	T	C	.	C/C	T/T	T/T	T/T	T/T	T/T	T/T	T/T	T/T	T/T	T/T	T/T	T/T	C/C	T/T	T/T	T/T	T/T	T/T	T/T	T/T	T/T	T/T	T/T	T/T	C/C	T/T	T/T	C/C	T/T	T/T	T/T	T/T	T/T	C/C	T/T	T/T	T/T	T/T	T/T	T/T	T/T	T/T	T/T
Pv08	6483262	ANNZ01024254-1_6739	G	T	.	T/T	.	G/G	T/T	G/G	G/G	T/T	G/G	G/G	G/G	G/G	G/G	G/G	T/T	G/G	T/T	G/G	G/G	G/G	G/G	G/G	G/G	G/G	G/G	.	G/G	G/G	G/G	T/T	G/G	G/G	G/G	G/G	G/G	T/T	T/T	.	.	G/G	G/G	G/G	G/G	G/G	G/G
Pv08	6652014	ANNZ01024261-1_56094	A	G	.	G/G	.	A/A	A/A	A/A	A/A	A/A	A/A	A/A	A/A	A/A	A/A	A/A	G/G	A/A	A/A	G/G	A/G	A/G	A/A	A/A	A/A	A/A	A/A	.	A/A	A/A	A/A	G/G	A/A	G/G	A/A	A/A	A/A	G/G	A/A	.	.	A/A	A/A	A/A	A/A	A/A	A/A
Pv08	6933275	ANNZ01024279-1_20375	T	C	.	C/C	C/C	T/T	T/T	T/T	T/T	T/T	T/T	T/T	T/T	T/T	T/T	T/T	C/C	T/T	T/T	C/C	C/C	C/C	T/T	T/T	T/T	T/T	T/T	C/C	T/T	T/T	T/T	C/C	T/T	C/C	T/T	T/T	T/T	C/C	T/T	C/C	C/C	T/T	T/T	T/T	T/T	T/C	T/T
Pv08	7095903	ANNZ01024287-1_459	T	C	.	C/C	T/T	C/C	T/T	T/T	T/T	T/T	T/T	T/C	T/T	T/T	T/T	T/T	C/C	C/C	T/T	C/C	C/C	C/C	T/T	T/T	T/T	T/T	T/T	T/T	T/T	C/C	C/C	T/T	T/T	C/C	T/T	T/T	T/T	T/C	T/T	T/T	T/T	C/C	C/C	T/T	T/T	T/C	T/T
Pv08	7684856	ANNZ01024313-1_17810	G	T	.	T/T	.	G/G	G/G	G/G	G/G	G/G	G/G	G/G	G/G	G/G	G/G	G/G	T/T	G/G	G/G	T/T	T/T	G/G	G/G	G/G	G/G	G/G	G/G	G/G	T/T	G/G	G/G	G/G	T/T	G/G	G/G	G/G	G/G	T/T	G/G	G/T	G/G	G/G	G/G	G/G	T/T	G/G	G/G
Pv08	7790518	ANNZ01024317-1_2415	A	G	.	A/A	.	G/G	G/G	A/A	A/A	G/G	A/A	A/G	A/A	A/A	G/G	A/A	A/A	G/G	G/G	A/A	A/A	A/A	A/A	A/A	A/A	A/A	A/A	.	A/A	G/G	G/G	A/A	A/A	G/G	A/A	A/A	A/A	A/A	G/G	.	.	G/G	G/G	A/A	A/A	A/G	A/A
Pv08	7819620	ANNZ01024317-1_31517	G	A	.	G/G	A/A	A/A	A/A	G/G	G/G	A/A	G/G	G/A	G/G	G/G	A/A	G/G	A/A	A/A	A/A	G/G	G/G	G/G	G/G	G/G	G/G	G/G	G/G	A/A	A/A	A/A	A/A	G/G	G/G	A/A	G/G	G/G	G/G	G/G	A/A	A/A	A/A	A/A	A/A	G/G	G/G	G/A	G/G
Pv08	7952109	ANNZ01024324-1_38404	T	C	.	C/C	T/T	T/T	T/T	T/T	T/T	T/T	T/T	T/T	T/T	T/T	T/T	T/T	T/T	T/T	T/T	C/C	C/C	T/T	T/T	T/T	T/T	T/T	T/T	T/T	T/T	T/T	T/T	T/T	C/C	T/T	T/T	T/T	T/T	C/C	T/T	T/T	T/T	T/T	T/T	T/T	C/C	T/T	T/T
Pv08	8091547	ANNZ01024334-1_10431	G	A	.	G/G	G/G	G/G	A/A	G/G	G/G	A/A	G/G	G/G	G/G	G/G	G/G	G/G	G/G	G/G	A/A	G/G	G/G	G/G	G/G	G/G	G/G	G/G	G/G	G/G	G/G	G/G	G/G	G/G	G/G	G/G	G/G	G/G	G/G	G/G	A/A	G/G	G/G	G/G	G/G	G/G	G/G	G/G	G/G
Pv08	8252332	ANNZ01024338-1_1887	T	G	.	T/T	G/G	T/T	G/G	T/T	T/T	G/G	T/T	T/T	T/T	T/T	T/T	T/T	T/T	T/T	G/G	T/T	T/T	T/T	T/T	T/T	T/T	T/T	T/T	G/G	T/T	T/T	T/T	T/T	T/T	T/T	T/T	T/T	T/T	T/T	G/G	G/G	G/G	T/T	T/T	T/T	T/T	T/T	T/T
Pv08	8312580	ANNZ01024344-1_9466	T	C	.	T/T	C/C	T/T	C/C	T/T	T/T	C/C	T/T	T/T	T/T	T/T	T/T	T/T	C/C	T/T	C/C	T/T	T/T	T/T	T/T	T/T	T/T	T/T	T/T	C/C	T/T	T/T	T/T	T/T	T/T	C/C	T/T	T/T	T/T	T/T	C/C	C/C	C/C	T/T	T/T	T/T	T/T	T/C	T/T
Pv08	8591437	ANNZ01024367-1_22155	G	A	.	G/G	A/A	G/G	A/A	G/G	G/G	A/A	G/G	G/G	G/G	G/G	G/G	G/G	A/A	G/G	A/A	G/G	G/G	G/G	G/G	G/G	G/G	G/G	G/G	A/A	G/G	G/G	G/G	G/G	G/G	A/A	G/G	G/G	G/G	G/G	A/A	A/A	A/A	G/G	G/G	G/G	G/G	G/A	G/G
Pv08	8618378	ANNZ01024367-1_49096	C	T	.	C/C	.	.	T/T	C/C	C/C	T/T	C/C	C/C	C/C	C/C	C/C	C/C	C/C	C/C	T/T	T/T	T/T	C/C	C/C	C/C	C/C	C/C	C/C	.	C/C	.	C/T	.	C/C	C/C	C/C	C/C	C/C	C/C	T/T	.	.	.	.	C/C	C/C	C/C	C/C
Pv08	8757909	ANNZ01024374-1_3690	C	A	.	A/A	C/C	A/A	A/A	C/C	C/C	A/A	C/C	C/A	C/C	C/C	A/A	C/C	C/C	A/A	A/A	C/C	C/C	C/C	C/C	C/C	C/C	C/C	C/C	C/C	A/A	A/A	A/A	C/C	C/C	C/C	C/C	C/C	C/C	C/C	A/A	C/C	C/C	A/A	A/A	C/C	C/C	C/C	C/C
Pv08	8815975	ANNZ01024374-1_61756	A	G	.	G/G	.	A/A	A/A	A/A	A/A	A/A	A/A	A/A	A/A	A/A	A/A	A/A	G/G	A/A	A/A	A/A	A/A	A/A	A/A	A/A	A/A	A/A	A/A	.	A/A	A/A	A/A	A/A	G/G	A/G	A/A	A/A	A/A	A/G	A/A	.	.	A/A	A/A	A/A	A/G	A/G	A/A
Pv08	8945062	ANNZ01024382-1_2068	G	A	.	G/G	.	G/G	A/A	G/G	G/G	A/A	G/G	G/G	G/G	G/G	G/G	G/G	G/G	G/G	A/A	G/G	G/G	G/G	G/G	G/G	G/G	G/G	G/G	.	G/G	G/G	G/G	G/G	G/G	G/G	G/G	G/G	G/G	G/G	A/A	.	.	G/G	G/G	G/G	G/G	G/G	G/G
Pv08	9056086	ANNZ01024392-1_9081	G	A	.	G/G	.	G/G	A/A	G/G	G/G	A/A	G/G	G/G	G/G	G/G	G/G	G/G	G/G	G/G	A/A	G/G	G/G	G/G	G/G	G/G	G/G	G/G	G/G	.	G/G	G/G	G/G	G/G	G/G	.	G/G	G/G	G/G	G/G	A/A	.	.	G/G	G/G	G/G	G/G	G/G	G/G
Pv08	9144742	ANNZ01024392-1_97677	C	.	.	.	.	.	.	.	.	.	.	.	.	.	.	.	.	.	.	.	.	.	.	.	.	.	.	.	.	.	.	.	.	.	.	.	.	.	.	.	.	.	.	.	.	.	.
Pv08	9296154	ANNZ01024396-1_44739	C	T	.	T/T	C/C	T/T	C/C	C/C	C/C	C/C	C/C	C/T	C/C	C/C	T/T	C/C	T/T	T/T	C/C	T/T	T/T	C/C	C/C	C/C	C/C	C/C	C/C	C/C	T/T	T/T	T/T	C/C	T/T	T/T	C/C	C/C	C/C	T/T	C/C	C/C	C/C	T/T	T/T	C/C	T/T	C/T	C/C
Pv08	9392914	ANNZ01024399-1_4605	C	A	.	C/C	.	.	A/A	C/C	C/C	A/A	C/C	C/C	C/C	C/C	.	C/C	C/C	.	A/A	.	.	C/C	C/C	C/C	C/C	C/C	C/C	.	.	.	.	C/C	C/C	C/C	C/C	C/C	C/C	C/C	A/A	.	.	.	.	C/C	C/C	C/C	C/C
Pv08	9489267	ANNZ01024404-1_9499	C	T	.	C/C	.	C/C	C/C	C/C	C/C	C/C	C/C	C/C	C/C	C/C	C/C	C/C	T/T	C/C	C/C	C/C	C/C	C/C	C/C	C/C	C/C	C/C	C/C	.	C/C	C/C	C/C	C/C	T/T	C/C	C/C	C/C	C/C	T/T	C/C	.	.	C/C	C/C	C/C	T/T	C/C	C/C
Pv08	9556700	ANNZ01024405-1_21650	C	T	.	T/T	.	C/C	C/C	C/C	C/C	C/C	C/C	C/C	C/C	C/C	C/C	C/C	T/T	C/C	C/C	T/T	T/T	C/C	C/C	C/C	C/C	C/C	C/C	.	C/C	C/C	C/C	C/C	T/T	C/C	C/C	C/C	C/C	T/T	C/C	.	.	C/C	C/C	C/C	T/T	C/C	C/C
Pv08	9797641	ANNZ01024418-1_71800	C	T	.	C/C	.	C/C	T/T	C/C	C/C	T/T	C/C	C/C	C/C	C/C	C/C	C/C	C/C	C/C	T/T	C/C	C/C	C/C	C/C	C/C	C/C	C/C	C/C	.	C/C	C/C	C/C	C/C	C/C	C/C	C/C	C/C	C/C	C/C	T/T	.	.	C/C	C/C	C/C	C/C	C/C	C/C
Pv08	9885833	ANNZ01024423-1_34433	C	T	.	T/T	.	C/C	C/C	C/C	C/C	C/C	C/C	C/C	C/C	C/C	C/C	C/C	T/T	C/C	C/C	T/T	T/T	C/C	C/C	C/C	C/C	C/C	C/C	.	C/C	C/C	C/C	C/C	T/T	C/C	C/C	C/C	C/C	T/T	C/C	.	.	C/C	C/C	C/C	T/T	C/C	C/C
Pv08	9940996	ANNZ01024428-1_30881	G	A	.	G/G	.	A/A	A/A	G/G	G/G	A/A	G/G	G/A	G/G	G/G	G/G	G/G	G/G	A/A	A/A	G/G	G/G	G/G	G/G	G/G	G/G	G/G	G/G	.	A/A	A/A	A/A	G/G	G/G	A/A	G/G	G/G	G/G	G/G	A/A	.	.	A/A	A/A	G/G	G/G	G/A	G/G
Pv08	10053937	ANNZ01024436-1_18214	A	C	.	A/C	.	A/A	A/A	A/A	A/A	A/A	A/A	A/A	A/A	A/A	A/A	A/A	A/C	A/A	A/A	A/C	A/C	A/A	A/A	A/A	A/A	A/A	A/A	.	A/A	A/A	A/A	A/A	A/C	A/A	A/A	A/A	A/A	A/C	A/A	.	.	A/A	A/A	A/A	A/C	A/A	A/A
Pv08	10190174	ANNZ01024452-1_33031	A	G	.	G/G	A/A	G/G	A/A	A/A	A/A	A/A	A/A	A/G	A/A	A/A	A/A	A/A	G/G	G/G	A/A	G/G	G/G	A/A	A/A	A/A	A/A	A/A	A/A	A/A	G/G	G/G	G/G	A/A	G/G	G/G	A/A	A/A	A/A	G/G	A/A	A/A	A/A	G/G	G/G	A/A	G/G	A/G	A/A
Pv08	10232625	ANNZ01024452-1_75482	T	C	.	T/T	.	T/T	C/C	T/T	T/T	C/C	T/T	T/T	T/T	T/T	T/T	T/T	T/T	T/T	C/C	T/T	T/T	T/T	T/T	T/T	T/T	T/T	T/T	.	T/T	T/T	T/T	T/T	T/T	T/T	T/T	T/T	T/T	T/T	C/C	.	.	T/T	T/T	T/T	T/T	T/T	T/T
Pv08	10387173	ANNZ01024466-1_41990	C	T	.	T/T	T/T	C/C	C/C	C/C	C/C	C/C	C/C	C/C	C/C	C/C	C/C	C/C	T/T	C/C	C/C	T/T	T/T	C/C	C/C	C/C	C/C	C/C	C/C	T/T	C/C	C/C	C/C	C/C	T/T	C/C	C/C	C/C	C/C	T/T	C/C	T/T	T/T	C/C	C/C	C/C	T/T	C/C	C/C
Pv08	10487149	ANNZ01024475-1_5007	A	G	.	A/A	.	G/G	G/G	A/A	A/A	A/A	A/A	A/A	A/A	A/A	A/A	A/A	G/G	G/G	G/G	G/G	G/G	A/A	A/A	A/A	A/A	A/A	A/A	A/G	G/G	G/G	G/G	A/A	A/A	G/G	A/A	A/A	A/A	G/G	A/A	.	.	G/G	G/G	A/A	A/A	A/G	A/A
Pv08	10542071	ANNZ01024485-1_4722	T	C	.	T/T	.	C/C	C/C	T/T	T/T	T/T	T/T	T/T	T/T	T/T	T/T	T/T	C/C	C/C	C/C	C/C	C/C	T/T	T/T	T/T	T/T	T/T	T/T	.	C/C	C/C	C/C	T/T	T/T	C/C	T/T	T/T	T/T	C/C	T/T	.	.	C/C	C/C	T/T	T/T	T/C	T/T
Pv08	10689882	ANNZ01024500-1_13645	T	G	.	T/T	.	G/G	G/G	T/T	T/T	T/T	T/T	T/T	T/T	T/T	T/T	T/T	G/G	G/G	G/G	G/G	G/G	T/T	T/T	T/T	T/T	T/T	T/T	.	G/G	G/G	G/G	T/T	T/T	G/G	T/T	T/T	T/T	G/G	T/T	.	.	G/G	G/G	T/T	T/T	T/G	T/T
Pv08	10771219	ANNZ01024505-1_5719	C	T	.	C/C	.	T/T	T/T	C/C	C/C	C/C	C/C	C/C	C/C	C/C	C/C	C/C	T/T	T/T	T/T	T/T	T/T	C/C	C/C	C/C	C/C	C/C	C/C	.	T/T	T/T	T/T	C/C	C/C	T/T	C/C	C/C	C/C	T/T	C/C	.	.	T/T	T/T	C/C	C/C	C/T	C/C
Pv08	11088723	ANNZ01024517-1_83402	G	A	.	A/A	G/G	G/G	A/A	G/G	G/G	G/G	G/G	G/G	G/G	G/G	G/G	G/G	A/A	G/G	A/A	A/A	A/A	G/G	G/G	G/G	G/G	G/G	G/G	G/G	A/A	G/G	G/G	G/G	G/G	A/A	G/G	G/G	G/G	A/A	G/G	G/G	G/G	G/G	G/G	G/G	G/G	G/A	G/G
Pv08	11124813	ANNZ01024519-1_23558	C	A	.	C/C	C/C	A/A	C/C	C/C	C/C	A/A	C/C	C/A	C/C	C/C	C/C	C/C	C/C	A/A	C/C	C/C	C/C	C/C	C/C	C/C	C/C	C/C	C/C	C/A	C/C	A/A	A/A	C/C	A/A	C/C	C/C	C/C	C/C	C/C	A/A	.	.	A/A	A/A	C/C	A/A	C/C	C/C
Pv08	11290466	ANNZ01024526-1_9463	C	T	.	T/T	.	C/C	T/T	C/C	C/C	C/C	C/C	C/C	C/C	C/C	C/C	C/C	T/T	C/C	T/T	T/T	T/T	C/C	C/C	C/C	C/C	C/C	C/C	.	T/T	C/C	C/C	C/C	T/T	C/C	C/C	C/C	C/C	T/T	C/C	.	.	C/C	C/C	C/C	T/T	C/C	C/C
Pv08	11539389	ANNZ01024565-1_8633	T	C	.	T/T	T/T	T/T	T/T	T/T	T/T	T/T	T/T	T/T	T/T	T/T	T/T	T/T	T/T	T/T	T/T	T/T	T/T	T/T	T/T	T/T	T/T	T/T	T/T	T/T	T/T	T/T	T/T	T/T	T/T	C/C	T/T	T/T	T/T	T/T	T/T	T/T	T/T	T/T	T/T	T/T	T/T	T/C	T/T
Pv08	12356676	ANNZ01024637-1_2891	T	G	.	G/G	.	T/T	G/G	T/T	T/T	T/T	T/T	T/T	T/T	T/T	T/T	T/T	G/G	T/T	G/G	G/G	G/G	T/T	T/T	T/T	T/T	T/T	T/T	.	T/T	T/T	T/T	T/T	T/T	T/T	T/T	T/T	T/T	G/G	T/T	.	.	T/T	T/T	T/T	T/T	T/T	T/T
Pv08	14062896	ANNZ01024749-1_1242	A	C	.	C/C	.	A/A	C/C	A/A	A/A	A/A	A/A	A/A	A/A	A/A	A/A	A/A	C/C	A/A	C/C	C/C	C/C	A/A	A/A	A/A	A/A	A/A	A/A	.	C/C	A/A	A/A	A/A	C/C	A/A	A/A	A/A	A/A	C/C	A/A	.	.	A/A	A/A	A/A	C/C	A/A	A/A
Pv08	14787414	ANNZ01024798-1_13163	T	G	.	G/G	G/G	G/G	G/G	T/T	T/T	T/T	T/T	T/G	T/T	T/T	T/T	T/T	G/G	G/G	G/G	G/G	G/G	T/T	T/T	T/T	T/T	T/T	T/T	G/G	G/G	G/G	G/G	T/T	T/T	T/T	T/T	T/T	T/T	G/G	T/T	G/G	G/G	G/G	G/G	T/T	T/T	T/T	T/T
Pv08	15144783	ANNZ01024818-1_6885	C	T	.	T/T	.	T/T	T/T	C/C	C/C	T/T	C/C	C/T	C/C	C/C	C/C	C/C	T/T	T/T	T/T	T/T	T/T	C/C	C/C	C/C	C/C	C/C	C/C	.	T/T	T/T	T/T	C/C	T/T	C/C	C/C	C/C	C/C	C/T	T/T	.	.	T/T	T/T	C/C	C/T	C/C	C/C
Pv08	33059900	ANNZ01026981-1_9030	C	T	.	T/T	.	T/T	T/T	C/C	C/C	T/T	C/C	C/T	C/C	C/C	C/C	C/C	T/T	T/T	T/T	T/T	T/T	C/C	C/C	C/C	C/C	C/C	T/T	.	T/T	T/T	T/T	C/C	T/T	T/T	C/C	T/T	C/C	C/C	T/T	.	.	T/T	T/T	C/C	T/T	C/C	C/C
Pv08	40168214	ANNZ01028047-1_9955	T	C	.	T/T	.	T/T	T/T	T/T	T/T	T/T	T/T	T/T	T/T	T/T	T/T	T/T	T/T	T/T	T/T	T/T	T/T	C/C	T/T	T/T	C/C	T/T	T/T	.	T/T	T/T	T/T	T/T	T/T	T/T	T/T	T/T	C/C	T/T	T/T	.	.	T/T	T/T	T/T	T/T	T/T	T/T
Pv08	42165978	ANNZ01028191-1_25485	C	A	.	A/A	A/A	C/C	A/A	C/C	C/C	C/C	C/C	C/C	C/C	C/C	C/C	C/C	A/A	C/C	A/A	A/A	A/A	C/C	C/C	C/C	C/C	C/C	C/C	A/A	C/C	C/C	C/C	C/C	C/C	C/C	C/C	C/C	C/C	A/A	A/A	A/A	A/A	C/C	C/C	C/C	C/C	C/C	C/C
Pv08	48550702	ANNZ01028628-1_7753	G	A	.	A/A	.	G/G	G/G	G/G	G/G	G/G	G/G	G/G	G/G	G/G	G/G	G/G	A/A	G/G	G/G	A/A	A/A	G/G	G/G	G/G	G/G	G/G	G/G	.	G/G	G/G	G/G	G/G	G/G	G/G	G/G	G/G	G/G	A/A	G/G	.	.	G/G	G/G	G/G	G/G	G/G	G/G
Pv08	49143141	ANNZ01028658-1_14098	G	A	.	G/G	.	G/G	G/G	G/G	G/G	G/G	G/G	G/G	G/G	G/G	G/G	G/G	A/A	G/G	G/G	G/G	G/G	G/G	G/G	G/G	G/G	G/G	G/G	.	G/G	G/G	G/G	G/G	G/G	G/G	G/G	G/G	G/G	G/G	G/G	.	.	G/G	G/G	G/G	G/G	G/G	G/G
Pv08	51162116	ANNZ01028759-1_29573	G	A	.	G/G	G/G	G/A	A/A	G/G	G/G	G/G	G/G	G/G	G/G	G/G	G/G	G/G	G/G	A/A	A/A	G/G	G/G	G/G	G/G	G/G	G/G	G/G	G/G	G/G	G/G	A/A	A/A	G/G	G/G	G/G	G/G	G/G	G/G	G/G	G/G	G/G	G/G	A/A	A/A	G/G	A/A	G/G	G/G
Pv08	52733970	ANNZ01028829-1_8727	G	T	.	G/G	.	G/G	G/G	G/G	G/G	G/G	G/G	G/G	G/G	G/G	G/G	G/G	G/G	G/G	G/G	.	G/G	G/G	G/G	G/G	G/G	G/G	G/G	.	G/G	G/G	G/G	G/G	G/G	G/G	G/G	G/G	G/G	G/G	G/G	.	.	G/G	G/G	G/G	G/G	G/G	G/G
Pv08	56047257	ANNZ01029003-1_15645	C	T	.	T/T	T/T	T/T	T/T	C/C	T/T	C/C	C/T	C/T	C/C	C/C	C/C	C/C	T/T	T/T	T/T	T/T	T/T	C/C	C/T	C/C	C/C	C/C	T/T	T/T	T/T	T/T	T/T	T/T	T/T	C/C	C/C	C/C	C/C	T/T	T/T	T/T	T/T	T/T	T/T	C/C	T/T	C/C	C/C
Pv08	57734740	ANNZ01029058-1_38872	A	G	.	G/G	G/G	G/G	G/G	A/A	G/G	G/G	A/G	A/G	G/G	G/G	G/G	G/G	G/G	G/G	G/G	G/G	G/G	A/A	A/G	A/A	A/A	G/G	G/G	G/G	G/G	G/G	G/G	G/G	G/G	A/A	G/G	A/A	G/G	A/A	G/G	G/G	G/G	G/G	G/G	G/G	G/G	A/A	A/A
Pv08	58286688	ANNZ01029071-1_126601	A	G	.	A/A	A/A	A/A	G/G	A/A	A/A	A/A	A/A	A/G	A/A	A/A	G/G	A/A	G/G	A/A	G/G	A/A	A/A	G/G	A/A	G/G	G/G	A/A	G/G	A/A	G/G	A/A	G/G	A/A	A/A	G/G	A/A	A/A	A/A	G/G	A/A	A/A	A/A	A/A	G/G	G/G	A/A	A/A	G/G
Pv08	58385592	ANNZ01029075-1_54406	C	T	.	C/C	C/C	C/T	T/T	T/T	C/C	T/T	C/T	C/T	T/T	C/C	C/C	C/C	C/C	T/T	T/T	T/T	T/T	T/T	C/C	T/T	T/T	C/C	C/T	C/C	C/C	T/T	T/T	C/C	T/T	T/T	C/C	C/C	C/C	T/T	T/T	C/C	C/C	T/T	T/T	T/T	T/T	C/C	T/T
Pv08	58573757	ANNZ01029080-1_68287	A	G;T	.	G/G	.	G/G	G/G	A/A	A/A	G/G	A/G	G/G	G/G	G/G	G/G	G/G	G/G	G/G	G/G	G/G	G/G	G/G	A/G	G/G	G/G	G/G	G/G	A/G	G/G	G/G	G/G	A/A	.	G/G	G/G	G/G	A/A	G/G	G/G	.	.	G/G	G/G	G/G	.	G/G	G/G
Pv08	58678386	ANNZ01029083-1_42739	G	A	.	A/A	.	A/A	A/A	A/A	G/G	A/A	G/A	A/A	A/A	A/A	A/A	A/A	G/G	A/A	A/A	A/A	A/A	A/A	G/A	A/A	A/A	A/A	A/A	.	G/G	A/A	A/A	A/A	A/A	A/A	A/A	A/A	G/G	A/A	A/A	.	.	A/A	A/A	A/A	A/A	A/A	A/A
Pv08	59279102	ANNZ01029088-1_130063	C	T	.	C/C	.	C/C	C/C	C/C	T/T	C/C	C/T	C/T	C/C	T/T	C/C	C/C	T/T	C/C	C/C	C/C	C/C	C/C	C/C	C/C	T/T	T/T	C/C	.	T/T	C/T	T/T	C/C	T/T	C/C	C/C	C/C	C/C	T/T	T/T	.	.	C/C	T/T	C/C	T/T	C/C	C/C
Pv08	59329684	ANNZ01029088-1_180645	G	A	.	.	.	G/G	G/G	G/G	.	G/G	G/G	G/G	.	.	G/G	G/G	.	.	G/G	G/G	G/G	G/G	G/G	G/G	.	.	G/G	.	.	G/G	A/A	G/G	.	G/G	G/G	.	G/G	.	.	.	.	G/G	.	.	.	.	.
Pv08	59337170	ANNZ01029088-1_188191	T	C	.	T/T	.	C/C	C/C	T/T	T/T	C/C	T/T	T/T	T/T	T/T	C/C	T/T	T/T	C/C	C/C	C/C	C/C	T/T	T/C	T/T	T/T	T/T	C/C	.	T/T	T/C	T/T	T/T	T/T	T/T	T/T	C/C	T/T	T/T	T/T	.	.	C/C	T/T	T/T	T/T	C/C	C/C
Pv08	59443062	ANNZ01029090-1_81951	G	A	.	G/G	.	G/G	G/G	G/G	.	G/G	G/G	G/A	A/A	G/G	G/G	G/G	G/G	G/G	G/G	G/G	G/G	G/G	G/G	G/G	G/G	G/G	G/G	.	G/G	G/A	A/A	G/G	A/A	G/G	G/G	G/G	G/G	G/G	A/A	.	.	G/G	A/A	G/G	A/A	G/G	G/G
Pv08	59613930	ANNZ01029101-1_16322	C	T	.	T/T	C/C	C/T	C/C	C/C	C/C	C/C	C/C	C/T	T/T	C/C	C/C	C/C	C/C	T/T	C/C	C/C	C/C	C/C	C/T	C/C	C/C	C/C	C/T	C/C	C/C	C/T	T/T	C/C	T/T	C/C	C/C	T/T	C/C	C/C	T/T	C/C	C/C	C/C	T/T	C/C	T/T	T/T	T/T
Pv09	298756	ANNZ01029173-1_3551	C	T	.	T/T	.	C/C	C/C	C/C	C/C	C/C	C/C	C/T	C/C	C/C	C/C	C/C	C/C	C/C	C/C	C/C	T/T	C/C	C/C	C/C	C/C	C/C	C/C	.	C/C	C/C	C/C	C/C	C/C	C/C	C/C	C/C	T/T	C/C	C/C	.	.	C/C	C/C	C/C	C/C	C/C	C/C
Pv09	399366	ANNZ01029177-1_1098	T	C	.	C/C	.	T/T	T/C	T/T	T/T	C/C	T/C	T/C	T/T	T/T	T/T	T/T	.	T/T	C/C	.	.	C/C	T/T	T/T	T/T	T/T	T/T	.	C/C	T/C	T/T	T/T	C/C	C/C	T/T	T/T	T/C	T/T	C/C	.	.	T/T	C/C	T/T	C/C	T/C	T/T
Pv09	452083	ANNZ01029177-1_53815	C	T	.	T/T	C/T	T/T	T/T	C/C	C/C	T/T	C/T	C/T	C/C	C/C	C/C	C/C	T/T	T/T	T/T	T/T	T/T	T/T	C/C	C/C	C/C	C/C	C/C	.	T/T	T/T	T/T	C/C	T/T	T/T	C/C	C/C	T/T	C/C	T/T	.	.	T/T	T/T	C/C	T/T	C/C	C/C
Pv09	592246	ANNZ01029185-1_37902	A	G	.	G/G	.	G/G	G/G	A/A	A/A	G/G	A/A	A/G	A/A	A/A	A/A	A/A	G/G	G/G	G/G	G/G	G/G	A/A	A/A	A/A	A/A	A/A	A/A	.	G/G	G/G	G/G	A/A	G/G	A/A	A/A	A/A	G/G	A/A	G/G	.	.	G/G	G/G	A/A	G/G	A/A	A/A
Pv09	1041612	ANNZ01029211-1_44677	T	C	.	.	.	.	.	T/T	C/C	.	T/C	T/C	T/T	T/T	T/T	C/C	.	.	.	C/C	C/C	T/T	T/T	T/T	T/T	C/C	T/T	.	.	.	.	T/T	.	T/T	T/T	T/T	T/T	T/T	.	.	.	.	.	T/T	.	T/T	T/T
Pv09	1200253	ANNZ01029227-1_15054	T	A	.	A/A	.	A/A	A/A	T/T	T/T	A/A	T/T	T/T	T/T	T/T	T/T	T/T	A/A	A/A	A/A	A/A	A/A	T/T	T/T	T/T	T/T	T/T	T/T	T/T	A/A	A/A	A/A	T/T	A/A	T/T	T/T	T/T	T/T	T/T	A/A	.	T/T	A/A	A/A	T/T	A/A	T/T	T/T
Pv09	1442835	ANNZ01029255-1_23983	A	C	.	A/A	A/A	A/A	A/A	A/A	A/A	A/A	A/C	A/C	A/A	A/A	C/C	A/A	A/A	A/A	A/A	A/A	A/A	C/C	A/C	A/A	C/C	C/C	C/C	A/A	A/A	A/A	A/A	C/C	A/A	C/C	A/A	A/A	C/C	A/A	A/A	A/A	A/A	A/A	A/A	C/C	A/A	C/C	A/A
Pv09	1896452	ANNZ01029285-1_14844	T	C	.	T/T	T/T	T/T	T/T	T/T	T/T	T/T	T/T	T/C	T/T	T/T	T/T	T/T	T/T	T/T	T/T	T/T	T/T	T/T	T/T	T/T	T/T	T/T	T/T	T/T	T/T	T/T	T/T	T/T	T/T	T/T	T/T	T/T	T/T	T/T	T/T	T/T	T/T	T/T	T/T	T/T	T/T	T/T	T/T
Pv09	1920965	ANNZ01029286-1_19252	C	T	.	C/C	C/C	C/C	C/C	C/C	C/C	C/C	C/C	C/T	C/C	C/C	T/T	C/C	C/C	C/C	C/C	C/C	C/C	C/C	C/T	C/C	T/T	T/T	T/T	C/C	C/C	C/C	C/C	T/T	C/C	C/C	C/C	C/C	T/T	C/C	C/C	C/C	C/C	C/C	C/C	T/T	C/C	T/T	C/C
Pv09	4130641	ANNZ01029503-1_49672	C	T	.	T/T	.	C/C	C/C	C/C	C/C	C/C	C/C	C/T	C/C	C/C	C/C	C/C	C/C	C/C	C/C	C/C	C/C	C/C	C/C	C/C	C/C	C/C	C/C	.	C/C	C/C	C/C	C/C	C/C	C/C	C/C	C/C	C/C	C/C	C/C	.	.	C/C	C/C	C/C	C/C	C/C	C/C
Pv09	4524073	ANNZ01029555-1_11468	G	A	.	G/G	.	G/A	G/A	G/G	G/G	G/A	G/G	G/G	G/G	G/G	G/G	G/G	G/A	G/A	G/A	G/A	G/A	G/G	G/G	G/G	G/G	G/G	G/G	.	A/A	G/A	G/A	G/G	G/A	G/G	G/G	G/G	G/G	G/G	G/A	.	.	G/A	G/A	G/G	G/A	G/G	G/G
Pv09	5291570	ANNZ01029667-1_3438	G	A	.	G/G	G/G	A/A	A/A	G/G	G/G	A/A	G/G	G/G	G/G	G/G	G/G	G/G	G/G	A/A	G/G	G/G	G/G	G/G	G/G	G/G	G/G	G/G	G/G	G/G	G/G	G/A	A/A	G/G	A/A	G/G	G/G	G/G	G/G	G/G	G/G	G/G	G/G	A/A	A/A	G/G	A/A	G/G	G/G
Pv09	5345844	ANNZ01029668-1_13975	C	T	.	C/C	.	T/T	T/T	C/C	C/C	T/T	C/C	C/C	C/C	C/C	C/C	C/C	T/T	T/T	T/T	T/T	T/T	C/C	C/C	C/C	C/C	C/C	C/C	.	T/T	T/T	T/T	C/C	T/T	C/C	C/C	C/C	C/C	C/C	T/T	.	.	T/T	T/T	C/C	T/T	C/C	C/C
Pv09	5663496	ANNZ01029685-1_3945	G	A	.	A/A	.	G/G	G/G	G/G	G/G	G/G	G/G	G/G	G/G	G/G	G/G	G/G	G/G	G/G	G/G	G/G	G/G	G/G	G/G	G/G	G/G	G/G	G/G	.	G/G	G/G	G/G	G/G	G/G	G/G	G/G	G/G	G/G	G/G	G/G	.	.	G/G	G/G	G/G	G/G	G/G	G/G
Pv09	5820133	ANNZ01029699-1_9564	C	T	.	C/C	.	T/T	T/T	C/C	C/C	T/T	C/C	C/T	C/C	C/C	C/C	C/C	T/T	T/T	T/T	T/T	T/T	C/C	C/C	C/C	C/C	C/C	C/C	.	T/T	T/T	T/T	C/C	T/T	C/C	C/C	C/C	C/C	C/C	T/T	.	.	T/T	T/T	C/C	T/T	C/C	C/C
Pv09	6038392	ANNZ01029708-1_25499	C	T	.	T/T	.	C/C	C/C	C/C	C/C	C/C	C/C	C/T	C/C	C/C	C/C	C/C	C/C	C/C	C/C	C/C	C/C	C/C	C/C	C/C	C/C	C/C	C/C	.	C/C	C/C	C/C	C/C	C/C	C/C	C/C	C/C	C/C	C/C	C/C	.	.	C/C	C/C	C/C	C/C	C/C	C/C
Pv09	6610195	ANNZ01029736-1_11476	C	T	.	C/C	.	C/C	C/C	C/C	C/C	C/C	C/C	C/C	C/C	C/C	C/C	C/C	C/C	C/C	C/C	C/C	C/C	C/C	C/C	C/C	C/C	C/C	C/C	.	C/C	C/C	T/T	C/C	T/T	C/C	C/C	C/C	C/C	C/C	C/C	.	.	C/C	T/T	C/C	T/T	C/C	C/C
Pv09	7197372	ANNZ01029774-1_9723	C	T	.	T/T	C/C	T/T	T/T	C/C	C/C	T/T	C/C	C/T	C/C	C/C	C/C	C/C	T/T	T/T	T/T	T/T	T/T	C/C	C/C	C/C	C/C	C/C	C/C	C/C	T/T	T/T	T/T	C/C	T/T	C/C	C/C	C/C	T/T	C/C	T/T	C/C	C/C	T/T	T/T	C/C	T/T	C/C	C/C
Pv09	7288943	ANNZ01029777-1_7057	A	C	.	C/C	.	C/C	C/C	A/A	A/A	C/C	A/A	A/C	A/A	A/A	A/A	A/A	C/C	C/C	C/C	C/C	C/C	A/A	A/A	A/A	A/A	A/A	A/A	.	C/C	C/C	C/C	A/A	C/C	A/A	A/A	A/A	C/C	A/A	C/C	.	.	C/C	C/C	A/A	C/C	A/A	A/A
Pv09	7321172	ANNZ01029778-1_26397	A	G	.	A/A	.	A/A	G/G	A/A	A/A	G/G	A/A	A/A	A/A	A/A	A/A	A/A	A/A	A/A	G/G	A/A	G/G	A/A	A/A	A/A	A/A	A/A	A/A	.	A/A	A/A	A/A	A/A	A/A	A/A	A/A	A/A	A/A	A/A	A/A	.	.	A/A	A/A	A/A	A/A	A/A	A/A
Pv09	7456327	ANNZ01029780-1_85342	G	T	.	T/T	.	G/G	G/G	G/G	G/G	G/G	G/G	G/T	G/G	G/G	G/G	G/G	G/G	G/G	G/G	G/G	G/G	G/G	G/G	G/G	G/G	G/G	G/G	.	G/G	G/G	T/T	G/G	T/T	G/G	G/G	G/G	G/G	G/G	G/G	.	.	G/G	T/T	G/G	T/T	G/G	G/G
Pv09	7598238	ANNZ01029784-1_41552	T	C	.	T/T	T/T	C/C	C/C	T/T	T/T	C/C	T/T	T/C	T/T	T/T	T/T	T/T	T/T	C/C	C/C	T/T	C/C	T/T	T/T	T/T	T/T	T/T	T/T	T/T	C/C	C/C	T/T	T/T	T/T	T/T	T/T	T/T	T/T	T/T	C/C	T/T	T/T	C/C	T/T	T/T	T/T	T/T	T/T
Pv09	7666764	ANNZ01029785-1_35256	T	C	.	T/T	T/C	C/C	C/C	T/T	T/T	C/C	T/T	T/C	T/T	T/T	T/T	T/T	C/C	C/C	C/C	T/T	C/C	T/T	T/T	T/T	T/T	T/T	T/T	T/T	C/C	C/C	T/T	T/T	T/T	T/T	T/T	T/T	T/T	T/T	C/C	T/C	T/C	C/C	T/T	T/T	T/T	T/T	T/T
Pv09	8180397	ANNZ01029811-1_39830	T	G	.	G/G	G/G	T/T	T/T	T/T	T/T	T/T	T/T	T/T	T/T	T/T	T/T	T/T	G/G	T/T	T/T	G/G	T/T	T/T	T/T	T/T	T/T	T/T	T/T	G/G	T/T	T/T	T/T	T/T	T/T	T/T	T/T	T/T	T/T	T/T	T/T	G/G	G/G	T/T	T/T	T/T	T/T	T/T	T/T
Pv09	8243604	ANNZ01029814-1_7699	C	T	.	C/C	T/T	T/T	T/T	C/C	C/C	T/T	C/C	C/C	C/C	C/C	C/C	C/C	C/C	T/T	T/T	C/C	T/T	C/C	C/C	C/C	C/C	C/C	C/C	T/T	T/T	T/T	T/T	C/C	T/T	C/C	C/C	C/C	C/C	C/C	T/T	T/T	T/T	T/T	T/T	C/C	T/T	C/C	C/C
Pv09	8833423	ANNZ01029844-1_3442	A	C	.	.	.	.	.	A/A	A/A	.	A/A	A/A	A/A	A/A	A/A	A/A	.	.	.	.	.	A/A	A/A	A/A	A/A	A/A	A/A	.	.	.	.	A/A	.	A/A	A/A	A/A	A/A	A/A	.	.	.	.	.	A/A	.	A/A	A/A
Pv09	8967151	ANNZ01029848-1_10158	A	G	.	A/A	.	G/G	G/G	A/A	A/A	G/G	A/A	A/A	A/A	A/A	A/A	A/A	G/G	G/G	G/G	G/G	G/G	A/A	A/A	A/A	A/A	A/A	A/A	A/G	G/G	G/G	G/G	A/A	G/G	A/A	A/A	A/A	A/A	A/A	G/G	.	.	G/G	G/G	A/A	G/G	A/A	A/A
Pv09	9385276	ANNZ01029871-1_28886	A	G	.	G/G	A/A	G/G	G/G	A/A	A/A	G/G	A/A	A/A	A/A	A/A	A/A	A/A	G/G	G/G	G/G	G/G	G/G	A/A	A/A	A/A	A/A	A/A	A/A	A/A	G/G	G/G	G/G	A/A	G/G	A/A	A/A	A/A	A/A	A/A	G/G	A/A	A/A	G/G	G/G	A/A	G/G	A/A	A/A
Pv09	9449810	ANNZ01029873-1_5608	A	G	.	G/G	A/A	G/G	G/G	A/A	A/A	G/G	A/A	A/A	A/A	A/A	A/A	A/A	G/G	G/G	G/G	G/G	G/G	A/A	A/A	A/A	A/A	A/A	A/A	A/A	G/G	G/G	G/G	A/A	G/G	A/A	A/A	A/A	A/A	A/A	G/G	A/A	A/A	G/G	G/G	A/A	G/G	A/A	A/A
Pv09	9583126	ANNZ01029884-1_20750	G	A	.	G/G	.	G/G	G/G	G/G	G/G	G/G	G/G	G/G	G/G	G/G	G/G	G/G	G/G	G/G	G/G	G/G	G/G	G/G	G/G	G/G	G/G	G/G	G/G	.	G/G	G/G	G/G	G/G	G/G	G/G	G/G	G/G	G/G	G/G	G/G	.	.	G/G	G/G	G/G	G/G	G/G	G/G
Pv09	9669985	ANNZ01029888-1_29279	G	A	.	G/G	G/G	G/G	G/G	G/G	G/G	G/G	G/G	G/G	G/G	G/G	G/G	G/G	G/G	G/G	G/G	G/G	G/G	G/G	G/G	G/G	G/G	G/G	G/G	G/G	G/G	G/G	G/G	G/G	G/G	G/G	G/G	G/G	G/G	G/G	G/G	.	G/G	G/G	G/G	G/G	G/G	G/G	G/G
Pv09	9817882	ANNZ01029899-1_49130	C	T	.	C/C	T/T	C/C	C/C	C/C	C/C	C/C	C/C	C/C	C/C	C/C	C/C	C/C	C/C	C/C	C/C	C/C	C/C	C/C	C/C	C/C	C/C	C/C	C/C	T/T	C/C	C/C	C/C	C/C	C/C	C/C	C/C	C/C	C/C	C/C	C/C	T/T	T/T	C/C	C/C	C/C	C/C	C/C	C/C
Pv09	9988357	ANNZ01029905-1_14062	G	A	.	A/A	G/G	A/A	A/A	G/G	G/G	A/A	G/G	G/G	G/G	G/G	G/G	G/G	A/A	A/A	A/A	A/A	G/G	G/G	G/G	G/G	G/G	G/G	G/G	G/G	A/A	A/A	A/A	G/G	A/A	G/G	G/G	G/G	G/G	G/G	A/A	G/G	G/G	A/A	A/A	G/G	G/G	G/G	G/G
Pv09	10005703	ANNZ01029905-1_31408	G	T	.	G/G	G/G	G/G	G/G	G/G	G/G	G/G	G/G	G/G	G/G	G/G	G/G	G/G	G/G	G/G	G/G	G/G	T/T	G/G	G/G	G/G	G/G	G/G	G/G	G/G	G/G	G/G	G/G	G/G	G/G	G/G	G/G	G/G	G/G	G/G	G/G	G/G	G/G	G/G	G/G	G/G	T/T	G/G	G/G
Pv09	10099236	ANNZ01029909-1_754	A	C	.	A/A	.	A/A	A/A	A/A	A/A	A/A	A/A	A/A	A/A	A/A	A/A	A/A	A/A	A/A	A/A	A/A	C/C	A/A	A/A	A/A	A/A	A/A	A/A	.	C/C	A/A	A/A	A/A	A/A	A/A	A/A	A/A	A/A	A/A	A/A	.	.	A/A	A/A	A/A	C/C	A/A	A/A
Pv09	10186218	ANNZ01029909-1_87736	A	G	.	G/G	A/A	G/G	G/G	A/A	A/A	G/G	A/A	A/A	A/A	A/A	A/A	A/A	A/A	G/G	G/G	G/G	A/A	A/A	A/A	A/A	A/A	A/A	A/A	A/A	G/G	G/G	G/G	A/A	G/G	A/A	A/A	A/A	A/A	A/A	G/G	A/A	A/A	A/G	G/G	A/A	A/A	A/A	A/A
Pv09	10285147	ANNZ01029911-1_54813	A	C	.	C/C	A/A	C/C	C/C	A/A	A/A	C/C	A/A	A/A	A/A	A/A	A/A	A/A	A/A	C/C	C/C	C/C	A/A	A/A	A/A	A/A	A/A	A/A	A/A	A/A	C/C	C/C	C/C	A/A	C/C	A/A	A/A	A/A	A/A	A/A	C/C	A/A	A/A	C/C	C/C	A/A	A/A	A/A	A/A
Pv09	10689027	ANNZ01029931-1_13946	G	T	.	G/G	G/G	G/G	G/G	G/G	G/G	G/G	G/G	G/T	T/T	T/T	T/T	G/G	G/G	G/G	G/G	G/G	G/G	G/G	G/G	G/G	G/G	T/T	G/G	G/G	G/G	G/G	G/G	G/G	G/G	G/G	G/G	G/G	G/G	G/G	G/G	G/G	G/G	G/G	G/G	T/T	G/G	G/G	G/G
Pv09	10797412	ANNZ01029932-1_23668	C	A	.	A/A	.	A/A	A/A	C/C	C/C	A/A	C/A	C/A	A/A	A/A	A/A	A/A	A/A	A/A	A/A	A/A	A/A	A/A	C/C	C/C	C/C	A/A	C/C	.	A/A	A/A	A/A	C/C	A/A	A/A	C/C	C/C	C/C	C/C	A/A	.	.	A/A	A/A	A/A	A/A	C/C	C/C
Pv09	10899579	ANNZ01029941-1_2545	G	T	.	.	.	.	.	.	.	.	.	G/T	.	.	G/G	.	.	.	.	.	.	.	.	G/G	.	.	.	.	.	.	.	.	.	.	.	.	.	.	.	.	.	.	.	.	.	.	.
Pv09	10996542	ANNZ01029943-1_29167	A	C	.	C/C	C/C	C/C	C/C	A/A	A/A	C/C	A/C	A/C	A/A	A/A	C/C	C/C	C/C	C/C	C/C	C/C	C/C	C/C	A/A	A/A	A/A	C/C	A/A	C/C	C/C	C/C	C/C	A/A	C/C	C/C	A/A	A/A	C/C	A/A	C/C	C/C	C/C	C/C	C/C	C/C	C/C	A/A	A/A
Pv09	11172548	ANNZ01029949-1_74588	C	T	.	C/C	.	C/C	C/C	C/C	T/T	C/C	C/T	C/T	C/C	C/C	C/C	C/C	C/C	C/C	C/C	C/C	C/C	C/C	C/T	T/T	T/T	C/C	T/T	.	C/C	C/C	C/C	T/T	C/C	C/C	T/T	T/T	C/C	T/T	C/C	.	.	C/C	C/C	C/C	C/C	T/T	C/C
Pv09	11263324	ANNZ01029953-1_23873	T	G	.	G/G	G/G	G/G	G/G	T/T	T/T	G/G	T/G	T/G	T/T	T/T	G/G	G/G	G/G	G/G	G/G	G/G	G/G	G/G	T/T	T/T	T/T	G/G	T/T	G/G	G/G	G/G	G/G	T/T	G/G	G/G	T/T	T/T	G/G	T/T	G/G	G/G	G/G	G/G	G/G	G/G	G/G	T/T	T/T
Pv09	11378863	ANNZ01029962-1_2218	T	C	.	C/C	.	C/C	C/C	T/T	T/T	C/C	C/C	T/C	T/T	T/T	C/C	C/C	C/C	C/C	C/C	C/C	C/C	C/C	T/T	T/T	T/T	C/C	C/C	.	C/C	C/C	C/C	T/T	C/C	C/C	T/T	T/T	C/C	T/T	C/C	.	.	C/C	C/C	C/C	C/C	T/T	T/T
Pv09	11463247	ANNZ01029974-1_17601	A	G	.	.	.	.	.	A/A	A/A	.	G/G	A/G	G/G	G/G	G/G	A/A	.	.	.	.	.	G/G	A/G	A/A	A/A	G/G	G/G	.	.	.	.	A/A	.	G/G	A/A	A/A	G/G	A/A	.	.	.	.	.	G/G	.	A/A	A/A
Pv09	11597553	ANNZ01029983-1_9853	A	G	.	A/A	.	A/A	A/A	A/A	A/A	A/A	A/G	A/A	A/A	A/A	G/G	A/A	A/A	A/A	A/A	A/A	A/A	A/A	A/A	A/A	A/A	G/G	G/G	.	A/A	A/A	A/A	A/A	A/A	A/A	A/A	A/A	G/G	A/A	A/A	.	.	A/A	A/A	G/G	A/A	A/A	A/A
Pv09	11649076	ANNZ01029983-1_61376	C	T	.	.	.	.	.	C/C	T/T	.	C/C	T/T	T/T	T/T	C/C	T/T	.	.	.	.	.	C/C	T/T	C/C	C/C	T/T	C/C	.	.	.	.	T/T	.	C/C	T/T	C/C	C/C	C/C	.	.	.	.	.	C/C	.	T/T	C/C
Pv09	11798326	ANNZ01029989-1_2288	C	T	.	.	.	.	.	C/C	T/T	.	C/C	C/T	C/C	C/C	C/C	T/T	.	.	.	.	.	C/C	C/T	C/C	T/T	C/C	C/C	.	.	.	.	T/T	.	C/C	T/T	C/C	C/C	T/T	.	.	.	.	.	C/C	.	C/C	C/C
Pv09	11854416	ANNZ01029991-1_24714	G	A	.	G/G	G/G	G/G	G/G	G/G	A/A	G/G	G/G	G/A	G/G	G/G	A/A	A/A	G/G	G/G	G/G	G/G	G/G	G/G	G/A	G/G	A/A	G/G	G/G	G/G	G/G	G/G	G/G	A/A	G/G	G/G	A/A	G/G	G/G	A/A	G/G	G/G	G/G	G/G	G/G	A/A	G/G	G/G	G/G
Pv09	11976431	ANNZ01029999-1_5448	G	T	.	G/G	G/G	G/G	T/T	G/G	G/G	T/T	G/G	G/G	G/G	G/G	G/G	G/G	G/G	G/G	G/G	G/G	G/G	G/G	G/G	G/G	G/G	G/G	G/G	G/G	G/G	G/G	T/T	G/G	T/T	G/G	G/G	G/G	G/G	G/G	G/G	G/G	G/G	G/G	T/T	G/G	T/T	G/G	G/G
Pv09	12099135	ANNZ01030007-1_15825	T	G	.	G/G	.	G/G	G/G	T/T	T/T	G/G	G/G	T/G	G/G	G/G	T/T	T/T	G/G	G/G	G/G	G/G	G/G	G/G	T/G	T/T	T/T	G/G	G/G	.	G/G	G/G	G/G	T/T	G/G	G/G	T/T	T/T	G/G	T/T	G/G	.	.	G/G	G/G	T/T	G/G	G/G	T/T
Pv09	12108352	ANNZ01030007-1_25042	C	A	.	C/C	C/C	C/C	A/A	C/C	C/C	A/A	C/C	C/C	C/C	C/C	C/C	C/C	C/C	C/C	C/C	C/C	C/C	C/C	C/C	C/C	C/C	C/C	C/C	C/C	C/C	C/C	A/A	C/C	A/A	C/C	C/C	C/C	C/C	C/C	C/C	C/C	C/C	C/C	A/A	C/C	A/A	C/C	C/C
Pv09	12209381	ANNZ01030011-1_2567	T	G	.	T/T	.	T/T	T/T	T/T	G/G	T/T	T/T	T/G	T/T	T/T	G/G	G/G	T/T	T/T	T/T	T/T	T/T	T/T	T/G	T/T	G/G	T/T	T/T	.	T/T	T/T	T/T	G/G	T/T	T/T	G/G	T/T	T/T	G/G	T/T	.	.	T/T	T/T	G/G	T/T	T/T	T/T
Pv09	12400878	ANNZ01030018-1_50317	T	C	.	T/T	T/T	T/T	T/T	T/T	T/T	T/T	T/C	C/C	C/C	C/C	T/T	T/T	T/T	T/T	T/T	T/T	T/T	C/C	T/C	T/T	T/T	C/C	C/C	T/T	T/T	T/T	T/T	T/T	T/T	C/C	T/T	T/T	C/C	T/T	T/T	T/T	T/T	T/T	T/T	T/T	T/T	C/C	T/T
Pv09	12699857	ANNZ01030033-1_2591	T	C	.	.	.	.	.	T/T	T/T	.	C/C	C/C	C/C	C/C	T/T	T/T	.	.	.	.	.	C/C	T/C	T/T	T/T	C/C	C/C	.	.	.	.	T/T	.	C/C	T/T	T/T	C/C	T/T	.	.	.	.	.	T/T	.	T/T	T/T
Pv09	12946683	ANNZ01030039-1_94761	G	A;T	.	G/G	.	G/G	G/G	G/G	G/G	G/G	G/G	G/G	G/G	G/G	G/G	G/G	G/G	G/G	G/G	G/G	G/G	G/G	G/A	G/G	G/G	G/G	A/A	.	G/G	G/G	G/G	G/G	G/G	G/G	A/A	G/G	G/G	A/A	G/G	.	.	G/G	G/G	G/G	G/G	G/G	G/G
Pv09	13097191	ANNZ01030047-1_15558	T	C	.	T/T	T/T	C/C	C/C	T/T	T/T	T/T	T/T	T/T	T/T	T/T	T/T	T/T	T/T	C/C	C/C	T/T	T/T	T/T	T/T	T/T	T/T	T/T	T/T	T/T	T/T	C/C	C/C	T/T	C/C	T/T	T/T	T/T	T/T	T/T	C/C	T/T	T/T	C/C	C/C	T/T	C/C	T/T	T/T
Pv09	13199002	ANNZ01030052-1_550	A	G	.	G/G	.	G/G	G/G	A/A	A/A	G/G	G/G	G/G	G/G	G/G	A/A	G/G	G/G	G/G	G/G	G/G	G/G	G/G	A/G	A/A	A/A	A/A	A/A	.	G/G	G/G	G/G	A/A	G/G	G/G	A/A	A/A	G/G	A/A	G/G	.	.	G/G	G/G	A/A	G/G	A/A	A/A
Pv09	13273974	ANNZ01030053-1_47168	T	C	.	T/T	T/T	C/C	C/C	T/T	T/T	C/C	T/C	T/T	T/T	T/T	T/T	T/T	T/T	C/C	C/C	T/T	T/T	T/T	T/T	T/T	T/T	T/T	T/T	T/T	T/T	C/C	C/C	T/T	C/C	T/T	T/T	T/T	T/T	T/T	C/C	T/T	T/T	C/C	C/C	T/T	C/C	T/T	T/T
Pv09	13305495	ANNZ01030054-1_14670	G	A	.	G/G	.	A/A	A/A	G/G	G/G	A/A	G/A	G/G	G/G	G/G	G/G	G/G	G/G	A/A	A/A	G/G	G/G	G/G	G/G	G/G	G/G	G/G	G/G	.	G/G	A/A	A/A	G/G	A/A	G/G	G/G	G/G	G/G	G/G	A/A	.	.	A/A	A/A	G/G	A/A	G/G	G/G
Pv09	13453874	ANNZ01030061-1_102879	T	C	.	T/T	T/T	C/C	C/C	T/T	T/T	C/C	T/C	T/T	T/T	T/T	T/T	T/T	T/T	C/C	C/C	T/T	T/T	T/T	T/T	T/T	T/T	T/T	T/T	T/T	C/C	C/C	C/C	T/T	C/C	T/T	T/T	T/T	T/T	T/T	C/C	T/T	T/T	C/C	C/C	T/T	C/C	T/T	T/T
Pv09	13565606	ANNZ01030063-1_47433	T	G	.	T/T	T/T	T/T	T/T	T/T	T/T	T/T	T/T	T/T	G/G	G/G	T/T	T/T	T/T	T/T	T/T	G/G	G/G	T/T	T/T	T/T	T/T	T/T	T/T	T/T	T/T	T/T	T/T	T/T	T/T	T/T	T/T	T/T	T/T	T/T	T/T	T/T	T/T	T/T	T/T	T/T	G/G	T/T	T/T
Pv09	13653262	ANNZ01030066-1_1134	A	C	.	C/C	C/C	C/C	C/C	A/A	A/A	C/C	A/C	A/A	C/C	C/C	A/A	A/A	C/C	C/C	C/C	C/C	C/C	A/A	A/A	A/A	A/A	A/A	A/A	C/C	C/C	C/C	C/C	A/A	C/C	A/A	A/A	A/A	A/A	A/A	C/C	C/C	C/C	C/C	C/C	A/A	A/A	A/A	A/A
Pv09	13766111	ANNZ01030071-1_14009	G	A	.	A/A	A/A	A/A	A/A	G/G	G/G	A/A	G/A	G/G	A/A	A/A	G/G	G/G	A/A	A/A	A/A	A/A	A/A	G/G	G/G	G/G	G/G	G/G	G/G	A/A	A/A	A/A	A/A	G/G	A/A	G/G	G/G	G/G	G/G	G/G	A/A	A/A	A/A	A/A	A/A	G/G	G/G	G/G	G/G
Pv09	14153173	ANNZ01030086-1_7333	G	A	.	G/G	A/A	A/A	A/A	A/A	A/A	A/A	A/A	A/A	A/A	A/A	A/A	G/G	G/G	A/A	A/A	G/G	A/A	A/A	G/A	A/A	A/A	G/G	G/G	A/A	A/A	A/A	A/A	A/A	A/A	A/A	G/G	A/A	G/G	G/G	A/A	A/A	A/A	A/A	A/A	A/A	A/A	G/G	G/G
Pv09	14943900	ANNZ01030125-1_31973	G	A	.	G/G	.	G/G	G/G	G/G	A/A	G/G	G/G	A/A	G/G	G/G	G/G	A/A	G/G	G/G	G/G	G/G	G/G	G/G	G/A	G/G	G/G	G/G	G/G	.	G/G	G/G	G/G	G/G	G/G	G/G	G/G	G/G	A/A	G/G	G/G	.	.	G/G	G/G	G/G	G/G	G/G	G/G
Pv09	15011862	ANNZ01030128-1_28306	C	T	.	C/C	C/C	C/C	C/C	C/C	T/T	C/C	C/C	T/T	C/C	C/C	C/C	T/T	C/C	C/C	C/C	C/C	C/C	C/C	C/T	T/T	T/T	C/C	C/C	C/C	C/C	C/C	C/C	C/C	C/C	C/C	C/C	C/C	T/T	C/C	C/C	C/C	C/C	C/C	C/C	C/C	C/C	C/C	C/C
Pv09	15117758	ANNZ01030132-1_76871	G	T	.	G/G	.	G/G	G/G	G/G	T/T	G/G	G/T	T/T	G/G	G/G	G/G	T/T	G/G	G/G	G/G	G/G	G/G	T/T	T/T	T/T	T/T	G/G	G/G	.	G/G	G/G	G/G	T/T	G/G	T/T	T/T	G/G	T/T	T/T	G/G	.	.	G/G	G/G	G/G	G/G	T/T	T/T
Pv09	16076146	ANNZ01030170-1_141930	G	T	.	.	.	G/G	G/G	G/G	T/T	G/G	G/T	T/T	G/G	G/G	T/T	T/T	G/G	G/G	G/G	G/G	G/G	T/T	G/T	G/G	T/T	G/G	T/T	.	G/G	G/G	G/G	T/T	G/G	T/T	G/G	G/G	T/T	G/G	G/G	.	.	G/G	G/G	G/G	G/G	G/G	G/G
Pv09	16129107	ANNZ01030172-1_36220	C	T	.	C/C	.	C/C	C/C	C/C	T/T	C/C	C/T	T/T	C/C	C/C	T/T	T/T	C/C	C/C	C/C	C/C	C/C	T/T	C/T	C/C	T/T	C/C	T/T	.	C/C	C/C	C/C	T/T	C/C	T/T	C/C	C/C	T/T	T/T	C/C	.	.	C/C	C/C	C/C	C/C	C/C	C/C
Pv09	16444559	ANNZ01030192-1_73184	G	A	.	A/A	.	A/A	A/A	G/G	G/G	A/A	G/A	G/G	A/A	A/A	G/G	G/G	G/G	A/A	A/A	G/G	A/A	G/G	G/G	G/G	G/G	G/G	G/G	.	A/A	A/A	A/A	G/G	A/A	G/G	G/G	G/G	G/G	G/G	A/A	.	.	A/A	A/A	G/G	A/A	G/G	G/G
Pv09	16591051	ANNZ01030202-1_6286	C	A	.	C/C	A/A	A/A	A/A	C/C	C/C	A/A	C/A	C/C	A/A	A/A	C/C	C/C	C/C	A/A	A/A	A/A	A/A	C/C	C/C	C/C	C/C	C/C	C/C	A/A	A/A	A/A	A/A	C/C	A/A	C/C	C/C	C/C	C/C	C/C	A/A	A/A	A/A	A/A	A/A	C/C	A/A	C/C	C/C
Pv09	16752542	ANNZ01030210-1_19099	C	A	.	C/C	A/A	A/A	A/A	C/C	C/C	A/A	C/A	C/C	C/C	C/C	C/C	C/C	C/C	A/A	A/A	C/C	A/A	C/C	C/C	C/C	C/C	C/C	C/C	A/A	A/A	A/A	A/A	C/C	A/A	C/C	C/C	C/C	C/C	C/C	A/A	A/A	A/A	A/A	A/A	C/C	A/A	C/C	C/C
Pv09	16814475	ANNZ01030214-1_32405	T	C	.	T/T	T/T	C/C	C/C	T/T	T/T	C/C	T/C	T/T	T/T	T/T	T/T	T/T	T/T	C/C	C/C	C/C	C/C	T/T	T/T	T/T	T/T	T/T	T/T	T/T	C/C	C/C	C/C	T/T	C/C	T/T	T/T	T/T	T/T	T/T	C/C	T/T	T/T	C/C	C/C	T/T	C/C	T/T	T/T
Pv09	17148355	ANNZ01030229-1_1113	A	G	.	A/A	G/G	G/G	G/G	A/A	A/A	G/G	A/G	A/A	A/A	A/A	A/A	A/A	A/A	G/G	G/G	A/A	G/G	A/A	A/A	A/A	A/A	A/A	A/A	G/G	G/G	G/G	G/G	A/A	G/G	A/A	A/A	A/A	A/A	A/A	G/G	G/G	G/G	G/G	G/G	A/A	G/G	A/A	A/A
Pv09	20618346	ANNZ01030397-1_28225	G	A	.	G/G	.	A/A	A/A	G/G	G/G	A/A	G/G	G/G	G/G	G/G	G/G	G/G	A/A	A/A	A/A	A/A	G/G	G/G	G/G	G/G	G/G	G/G	G/G	.	A/A	A/A	A/A	G/G	A/A	G/G	G/G	G/G	G/G	G/G	A/A	.	.	A/A	A/A	G/G	A/A	G/G	G/G
Pv09	20897972	ANNZ01030403-1_50729	A	G	.	A/A	A/A	G/G	A/A	A/A	A/A	G/G	A/A	A/A	A/A	A/A	A/A	A/A	A/A	G/G	A/A	A/A	A/A	A/A	A/A	A/A	A/A	A/A	A/A	A/A	G/G	G/G	G/G	A/A	G/G	A/A	A/A	A/A	A/A	A/A	G/G	A/A	A/A	G/G	G/G	A/A	G/G	A/A	A/A
Pv09	21132880	ANNZ01030410-1_9236	T	C	.	C/C	.	C/C	C/C	T/T	T/T	C/C	T/T	T/T	T/T	T/T	T/T	T/T	T/T	C/C	C/C	T/T	T/T	T/T	T/T	T/T	T/T	T/T	T/T	.	C/C	C/C	C/C	T/T	C/C	T/T	T/T	T/T	T/T	T/T	C/C	.	.	C/C	C/C	T/T	C/C	T/T	T/T
Pv09	21599631	ANNZ01030436-1_3093	A	C	.	A/A	.	A/A	A/A	A/A	A/A	A/A	A/A	A/A	A/A	A/A	A/A	A/A	A/A	A/A	A/A	A/A	A/A	A/A	A/A	A/A	A/A	A/A	A/A	.	A/A	A/A	A/A	A/A	A/A	A/A	A/A	A/A	A/A	A/A	A/A	.	.	A/A	A/A	A/A	C/C	A/A	A/A
Pv09	21833794	ANNZ01030445-1_40382	C	A	.	A/A	A/A	A/A	A/A	C/C	C/C	A/A	C/A	C/C	C/C	A/A	A/A	C/C	A/A	A/A	A/A	A/A	A/A	A/A	C/C	C/C	C/A	A/A	A/A	A/A	A/A	A/A	A/A	C/C	A/A	A/A	C/C	C/C	C/C	C/C	A/A	A/A	A/A	A/A	A/A	C/C	A/A	A/A	A/A
Pv09	22346230	ANNZ01030468-1_17907	G	A	.	G/G	G/G	G/G	G/G	G/G	A/A	G/G	G/A	G/G	A/A	G/G	G/G	G/G	G/G	G/G	G/G	G/G	G/G	G/G	A/A	A/A	G/G	G/G	G/G	G/G	G/G	G/G	G/G	G/G	G/G	G/G	A/A	G/G	A/A	G/G	G/G	G/G	G/G	G/G	G/G	A/A	G/G	G/G	G/G
Pv09	22786036	ANNZ01030486-1_5781	G	A	.	G/G	G/G	G/G	G/G	G/G	G/G	A/A	G/G	G/G	G/G	G/G	G/G	G/G	G/G	G/G	G/G	G/G	G/G	G/G	G/G	G/G	A/A	G/G	G/G	G/G	G/G	G/G	G/G	G/G	G/G	G/G	G/G	G/G	G/G	G/G	A/A	G/G	G/G	G/G	G/G	G/G	A/A	G/G	G/G
Pv09	23568418	ANNZ01030504-1_32520	G	A	.	G/G	G/G	G/G	G/G	G/G	G/G	G/G	G/A	G/G	A/A	G/G	G/G	G/G	G/G	G/G	G/G	G/G	G/G	G/G	G/A	A/A	G/G	G/G	G/G	G/G	G/G	G/G	G/G	G/G	G/G	G/G	A/A	G/G	A/A	G/G	G/G	G/G	G/G	G/G	G/G	A/A	G/G	G/G	G/G
Pv09	24937139	ANNZ01030559-1_6600	G	A	.	G/G	.	G/G	G/G	G/G	G/G	G/G	G/A	G/G	A/A	G/G	G/G	G/G	G/G	G/G	G/G	G/G	G/G	G/G	G/A	A/A	G/G	G/G	G/G	.	G/G	G/G	G/G	G/G	G/G	G/G	A/A	G/G	A/A	G/G	G/G	.	.	G/G	G/G	A/A	G/G	G/G	G/G
Pv09	25249363	ANNZ01030570-1_7106	G	T	.	G/G	G/G	T/T	G/G	G/G	G/G	T/T	G/G	G/G	G/G	G/G	G/G	G/G	G/G	T/T	G/G	G/G	G/G	G/G	G/G	G/G	G/G	G/G	G/G	G/G	G/G	T/T	T/T	G/G	G/G	G/G	G/G	G/G	G/G	G/G	G/G	G/G	G/G	T/T	T/T	G/G	T/T	G/G	G/G
Pv09	26718127	ANNZ01030655-1_106430	A	G	.	A/A	A/A	A/A	A/A	A/A	A/A	A/A	G/G	A/A	G/G	A/A	A/A	A/A	A/A	A/A	A/A	A/A	A/A	A/A	A/G	G/G	A/A	A/A	A/A	A/A	A/A	A/A	A/A	A/A	A/A	A/A	G/G	A/A	G/G	A/A	A/A	A/A	A/A	A/A	A/A	G/G	A/A	A/A	A/A
Pv09	26803057	ANNZ01030661-1_22542	G	A	.	G/G	.	G/G	G/G	G/G	G/G	G/G	A/A	G/G	A/A	G/G	G/G	G/G	G/G	G/G	G/G	G/G	G/G	G/G	G/A	A/A	G/G	G/G	G/G	.	G/G	G/G	G/G	G/G	G/G	G/G	A/A	G/G	A/A	G/G	G/G	.	.	G/G	G/G	A/A	G/G	G/G	G/G
Pv09	27627271	ANNZ01030692-1_54798	G	A	.	G/G	.	G/G	G/G	G/G	A/A	G/G	G/A	G/G	G/G	G/G	G/G	G/G	G/G	G/G	G/G	G/G	G/G	G/G	G/A	G/G	G/G	G/G	G/G	.	G/G	G/G	G/G	G/G	G/G	G/G	G/G	G/G	A/A	G/G	G/G	.	.	G/G	G/G	G/G	G/G	G/G	G/G
Pv09	28298127	ANNZ01030714-1_13520	G	T	.	G/G	.	.	.	G/G	G/G	.	G/G	G/G	G/G	.	G/G	G/G	T/T	.	.	.	.	G/G	G/G	G/G	.	G/G	G/G	.	G/G	.	G/G	G/G	.	G/G	G/G	G/G	G/G	.	.	.	.	T/T	.	G/G	G/T	G/G	G/G
Pv09	28496563	ANNZ01030716-1_80003	G	A	.	A/A	.	A/A	G/G	G/G	G/G	A/A	G/G	G/G	G/G	.	G/G	G/G	A/A	A/A	G/G	A/A	A/A	G/G	G/G	G/G	A/A	G/G	G/G	.	G/G	A/A	A/A	G/G	G/G	G/G	G/G	G/G	G/G	A/A	.	.	.	A/A	A/A	G/G	A/A	G/G	G/G
Pv09	28599736	ANNZ01030728-1_20651	C	T	.	C/C	C/C	C/C	C/C	C/C	C/C	C/C	C/C	C/C	C/C	C/C	C/C	C/C	C/C	C/C	C/C	C/C	C/C	C/C	C/C	C/C	C/C	C/C	C/T	C/C	C/C	C/C	C/C	C/C	C/C	C/C	C/C	C/C	T/T	C/C	C/C	C/C	C/C	C/C	C/C	C/C	C/C	C/C	C/C
Pv09	29140477	ANNZ01030741-1_51471	A	G	.	G/G	.	G/G	A/A	A/A	A/A	G/G	A/A	A/A	A/A	G/G	A/A	A/A	G/G	G/G	A/A	G/G	G/G	A/A	A/A	A/A	A/G	A/A	A/A	.	A/A	G/G	G/G	A/A	G/G	A/A	A/A	A/A	A/A	A/G	G/G	.	.	G/G	G/G	A/A	G/G	A/A	A/A
Pv09	31063768	ANNZ01030803-1_4245	T	C	.	C/C	T/T	C/C	C/C	T/T	T/T	C/C	T/T	T/T	T/T	C/C	T/T	T/T	T/T	C/C	C/C	C/C	C/C	T/T	T/T	T/T	T/T	T/T	T/T	T/T	T/T	C/C	C/C	T/T	C/C	T/T	T/T	T/T	T/T	T/C	C/C	T/T	.	C/C	C/C	T/T	C/C	T/T	T/T
Pv09	31852387	ANNZ01030870-1_8134	G	A	.	G/G	.	G/G	G/G	G/G	G/G	G/G	G/G	G/G	G/G	G/G	G/G	G/G	A/A	G/G	G/G	G/G	G/G	G/G	G/G	G/G	G/G	G/G	G/G	.	A/A	G/G	G/G	G/G	A/A	G/G	G/G	G/G	G/G	G/G	G/G	.	.	G/G	G/G	G/G	A/A	G/G	G/G
Pv09	32589354	ANNZ01030900-1_54666	A	G	.	A/A	.	G/G	G/G	A/A	.	G/G	A/A	A/A	A/A	G/G	A/A	A/A	A/A	G/G	A/A	.	A/A	A/A	A/A	A/A	A/A	A/A	A/A	.	G/G	G/G	A/A	A/A	G/G	A/A	A/A	A/A	A/A	A/A	A/A	.	.	G/G	A/A	A/A	G/G	A/A	A/A
Pv09	32748073	ANNZ01030909-1_52645	A	G	.	G/G	.	A/A	A/A	A/A	A/A	A/A	A/A	A/A	A/A	G/G	A/A	A/A	A/A	A/A	G/G	G/G	G/G	A/A	A/A	A/A	A/A	A/A	A/A	.	G/G	A/A	G/G	A/A	G/G	A/A	A/A	A/A	A/A	A/G	G/G	.	.	A/A	G/G	A/A	G/G	A/A	A/A
Pv09	32823352	ANNZ01030910-1_56885	C	T	.	.	.	C/C	C/C	C/C	C/C	C/C	C/C	C/C	C/C	.	C/C	C/C	C/C	C/C	C/C	.	.	C/C	C/C	C/C	C/C	C/C	C/C	.	C/C	C/C	C/C	C/C	.	C/C	C/C	C/C	C/C	C/C	.	.	.	C/C	C/C	C/C	.	C/C	C/C
Pv09	32907016	ANNZ01030915-1_8790	A	G	.	A/A	A/A	G/G	G/G	A/A	A/A	G/G	A/A	A/A	A/A	A/A	A/A	A/A	G/G	G/G	G/G	A/A	A/A	A/A	A/A	A/A	A/A	A/A	A/A	A/A	G/G	G/G	G/G	A/A	G/G	A/A	A/A	A/A	A/A	A/A	G/G	A/A	A/A	G/G	G/G	A/A	G/G	A/A	A/A
Pv09	33078098	ANNZ01030924-1_36509	T	C	.	C/C	.	C/C	C/C	T/T	T/T	C/C	T/C	C/C	T/T	C/C	T/T	C/C	C/C	C/C	C/C	C/C	C/C	T/T	C/C	T/T	C/C	T/T	C/C	.	C/C	C/C	C/C	T/T	C/C	T/T	C/C	C/C	C/C	C/C	C/C	.	.	C/C	C/C	C/C	C/C	C/C	T/T
Pv09	33213556	ANNZ01030924-1_171967	G	A	.	G/A	G/G	G/G	G/G	G/G	G/G	G/G	G/G	G/G	G/G	G/A	G/G	G/G	G/G	G/G	G/G	A/A	G/A	G/G	G/G	G/G	G/G	G/G	G/G	G/G	G/G	G/G	G/G	G/G	G/G	G/G	G/G	G/G	G/G	G/G	G/A	G/G	G/G	G/G	G/G	G/G	G/G	G/G	G/G
Pv09	33383033	ANNZ01030934-1_28705	G	A	.	A/A	A/A	A/A	A/A	G/G	G/G	A/A	G/G	G/G	G/G	A/A	G/G	G/G	A/A	A/A	A/A	A/A	A/A	G/G	G/G	G/G	G/G	G/G	G/G	A/A	A/A	A/A	A/A	G/G	A/A	G/G	G/G	G/G	G/G	G/G	A/A	A/A	A/A	A/A	A/A	G/G	A/A	G/G	G/G
Pv09	33489049	ANNZ01030936-1_36038	T	G	.	T/T	T/T	T/T	T/T	T/T	T/T	T/T	T/G	T/G	G/G	T/T	G/G	T/T	T/T	T/T	T/T	T/T	T/T	G/G	T/T	G/G	G/G	G/G	T/T	T/T	T/T	T/T	T/T	T/T	T/T	G/G	T/T	T/T	T/T	T/T	T/T	T/T	T/T	T/T	T/T	G/G	T/T	T/T	G/G
Pv09	33508620	ANNZ01030936-1_55609	C	A	.	A/A	C/C	C/C	C/C	C/C	C/C	C/C	C/C	C/C	C/C	A/A	C/C	C/C	C/C	C/C	C/C	A/A	A/A	C/C	C/C	C/C	C/C	C/C	C/C	C/C	C/C	C/C	C/C	C/C	C/C	C/C	C/C	C/C	C/C	C/C	A/A	C/A	C/C	C/C	C/C	C/C	C/C	C/C	C/C
Pv09	33769589	ANNZ01030949-1_25874	C	T	.	C/C	.	C/C	C/C	C/C	C/C	C/C	T/T	C/T	T/T	C/C	T/T	C/C	C/C	C/C	C/C	C/C	C/C	T/T	C/T	T/T	T/T	T/T	C/C	.	C/C	C/C	C/C	T/T	C/C	T/T	T/T	C/C	T/T	C/C	C/C	.	.	C/C	C/C	T/T	C/C	C/C	C/C
Pv09	33810884	ANNZ01030950-1_18598	A	G	.	G/G	.	G/G	G/G	A/A	A/A	G/G	A/A	A/G	A/A	G/G	A/A	G/G	G/G	G/G	G/G	G/G	G/G	A/A	A/G	A/A	A/A	A/A	G/G	.	G/G	G/G	G/G	A/A	G/G	A/A	A/A	A/A	A/A	G/G	G/G	.	.	G/G	G/G	A/A	G/G	G/G	G/G
Pv09	34061109	ANNZ01030966-1_20344	C	T	.	T/T	T/T	T/T	T/T	C/C	T/T	T/T	C/C	C/T	C/C	T/T	C/C	T/T	T/T	T/T	T/T	T/T	T/T	C/C	C/T	C/C	C/C	C/C	T/T	T/T	T/T	T/T	T/T	C/C	T/T	C/C	C/C	C/C	C/C	T/T	T/T	T/T	T/T	T/T	T/T	C/C	T/T	T/T	T/T
Pv09	34168918	ANNZ01030970-1_4518	G	T	.	T/T	T/T	T/T	T/T	G/G	G/G	G/T	G/G	G/G	G/G	T/T	G/G	G/G	.	T/T	T/T	.	.	G/G	G/G	G/G	G/G	G/G	G/G	T/T	G/T	T/T	T/T	G/G	G/T	G/G	G/G	G/G	G/G	G/G	G/T	T/T	T/T	T/T	.	G/G	G/T	G/G	G/T
Pv09	34260085	ANNZ01030975-1_28368	C	A	.	A/A	.	A/A	A/A	C/C	C/C	A/A	C/A	C/C	C/C	A/A	C/C	C/C	A/A	A/A	A/A	A/A	A/A	C/C	C/C	C/C	C/C	C/C	C/C	.	A/A	A/A	A/A	C/C	A/A	C/C	C/C	C/C	C/C	A/A	A/A	.	.	A/A	A/A	C/C	A/A	C/C	A/A
Pv09	34399414	ANNZ01030980-1_30701	A	C	.	C/C	.	C/C	C/C	.	.	C/C	A/C	A/A	A/A	.	A/A	A/A	C/C	C/C	C/C	C/C	A/C	A/A	A/A	A/A	.	A/A	A/A	.	C/C	C/C	C/C	A/A	C/C	A/A	A/A	A/A	.	C/C	.	.	.	C/C	C/C	A/A	C/C	A/A	C/C
Pv09	34428572	ANNZ01030981-1_22294	T	C	.	C/C	.	.	.	.	.	.	.	.	.	.	.	.	.	.	.	.	.	.	.	T/T	.	.	.	.	.	.	.	.	.	.	.	.	.	.	.	.	.	.	.	.	.	.	.
Pv09	34556291	ANNZ01030991-1_10196	A	G	.	G/G	A/A	G/G	G/G	A/A	A/A	G/G	A/G	A/A	A/A	G/G	A/A	A/A	G/G	G/G	G/G	G/G	G/G	A/A	A/A	A/A	A/A	A/A	A/A	A/A	G/G	G/G	G/G	A/A	G/G	A/A	A/A	A/A	A/A	G/G	G/G	A/A	A/A	G/G	G/G	A/A	G/G	A/A	G/G
Pv09	35368089	ANNZ01031021-1_9730	C	T	.	C/C	.	T/T	T/T	C/C	C/C	T/T	C/T	C/C	C/C	C/C	C/C	C/C	T/T	T/T	C/C	T/T	T/T	C/C	C/C	C/C	C/C	C/C	C/C	C/T	T/T	T/T	T/T	C/C	T/T	C/C	C/C	C/C	C/C	C/C	T/T	.	.	T/T	T/T	C/C	T/T	C/C	C/C
Pv09	35369957	ANNZ01031021-1_11538	G	A	.	G/G	.	A/A	A/A	G/G	G/G	A/A	G/A	G/G	G/G	G/G	G/G	G/G	A/A	A/A	G/G	A/A	A/A	G/G	G/G	G/G	G/G	G/G	G/G	.	A/A	A/A	A/A	G/G	A/A	G/G	G/G	G/G	G/G	G/G	G/G	.	.	A/A	A/A	G/G	A/A	G/G	G/G
Pv09	35454633	ANNZ01031027-1_31884	G	A	.	A/A	G/G	A/A	A/A	G/G	A/A	A/A	G/A	G/G	G/G	G/G	G/G	G/G	A/A	A/A	A/A	A/A	A/A	G/G	G/G	G/G	G/G	G/G	G/G	G/G	A/A	A/A	A/A	A/A	A/A	G/G	G/G	A/A	G/G	A/A	A/A	G/G	G/G	A/A	A/A	G/G	A/A	A/A	A/A
Pv09	36035904	ANNZ01031040-1_34679	T	C	.	C/C	T/T	C/C	C/C	T/T	T/T	C/C	T/T	T/T	T/T	T/T	T/T	T/T	C/C	C/C	T/T	C/C	C/C	T/T	T/T	T/T	T/T	T/T	T/T	T/T	T/T	C/C	C/C	T/T	T/T	T/T	T/T	T/T	T/T	C/C	C/C	T/T	T/T	C/C	C/C	C/C	T/T	T/T	C/C
Pv09	36196957	ANNZ01031042-1_66878	A	C	.	C/C	.	A/A	A/A	A/A	A/A	A/A	A/C	A/A	A/A	A/A	A/A	A/A	A/A	A/A	A/A	C/C	C/C	A/A	A/A	A/A	A/A	A/A	A/A	.	A/A	A/A	A/A	A/A	C/C	A/A	A/A	A/A	A/A	A/A	A/A	.	.	A/A	A/A	C/C	C/C	A/A	A/A
Pv09	36698504	ANNZ01031063-1_73037	C	T	.	T/T	T/T	T/T	C/C	C/C	C/C	C/C	C/T	C/C	C/C	C/C	C/C	C/C	C/C	T/T	T/T	T/T	T/T	C/C	C/C	C/C	C/C	C/C	C/C	T/T	C/C	T/T	T/T	C/C	C/C	C/C	C/C	C/C	C/C	C/C	T/T	T/T	T/T	T/T	T/T	T/T	C/C	C/C	C/C
Pv09	37169063	ANNZ01031078-1_13069	G	A	.	G/G	.	G/G	G/G	G/G	G/G	G/G	G/G	G/G	G/G	G/G	.	G/G	G/G	G/G	G/G	G/G	G/G	G/G	G/G	G/G	G/G	G/G	G/G	.	A/A	G/G	G/G	G/G	G/G	G/G	G/G	G/G	G/G	G/G	G/G	.	.	G/G	G/G	G/G	G/G	.	G/G
Pv09	37217760	ANNZ01031083-1_22234	C	T	.	C/C	C/C	C/C	C/C	C/C	C/C	C/C	C/C	C/C	C/C	C/C	C/C	C/C	T/T	C/C	C/C	C/C	C/C	C/C	C/C	C/C	C/C	C/C	C/C	C/C	T/T	C/C	C/C	C/C	C/C	C/C	C/C	C/C	C/C	C/C	C/C	C/C	C/C	C/C	C/C	C/C	C/C	C/C	T/T
Pv09	37338468	ANNZ01031083-1_142942	C	T	.	C/C	C/C	C/C	T/T	C/C	C/C	T/T	C/C	C/C	C/C	C/C	C/C	C/C	C/C	C/C	T/T	T/T	T/T	C/C	C/C	C/C	C/C	C/C	C/C	C/C	C/C	C/C	C/C	C/C	C/C	C/C	C/C	C/C	C/C	C/C	C/C	C/C	C/C	C/C	C/C	T/T	C/C	C/C	C/C
Pv10	182336	ANNZ01031113-1_14813	T	G	.	T/T	.	G/G	T/T	T/T	T/T	T/T	T/G	T/T	G/G	T/T	G/G	T/T	.	G/G	T/T	T/T	T/T	G/G	T/T	T/T	T/T	T/T	T/T	.	T/T	G/G	G/G	T/T	T/T	G/G	T/T	T/T	T/T	T/G	G/G	.	.	G/G	T/T	T/T	T/T	T/T	G/G
Pv10	764399	ANNZ01031137-1_19015	G	A	.	A/A	G/G	G/A	G/A	G/G	G/G	A/A	G/A	G/A	A/A	G/G	A/A	G/G	A/A	G/A	G/A	A/A	A/A	A/A	G/G	G/A	G/A	G/G	G/G	G/G	A/A	G/A	G/A	G/G	A/A	A/A	G/G	G/A	G/G	G/A	A/A	G/G	G/G	G/A	A/A	G/G	A/A	G/G	A/A
Pv10	984396	ANNZ01031147-1_40783	G	A	.	A/A	.	A/A	A/A	G/G	G/G	A/A	G/A	G/G	G/G	G/G	G/G	G/G	A/A	A/A	A/A	G/G	G/G	A/A	G/G	G/G	G/G	G/G	G/G	.	A/A	A/A	A/A	G/G	G/G	A/A	G/G	G/G	G/G	G/G	G/G	.	.	A/A	A/A	G/G	G/G	G/G	G/G
Pv10	2313463	ANNZ01031196-1_11178	A	G	.	A/A	A/A	A/A	G/G	A/A	A/A	G/G	A/A	A/A	A/A	A/A	A/A	A/A	A/A	A/A	G/G	A/A	A/A	A/A	A/A	A/A	A/A	A/A	A/A	A/A	G/G	A/A	A/A	A/A	A/A	A/A	A/A	A/A	A/A	A/A	A/A	A/A	A/A	A/A	G/G	A/A	A/A	A/A	A/A
Pv10	2372399	ANNZ01031198-1_21036	T	G	.	T/T	.	.	.	T/T	T/T	.	T/T	T/T	T/T	T/T	.	T/T	G/G	T/T	.	.	.	.	T/T	T/T	.	T/T	T/T	.	.	T/T	T/T	T/T	T/T	.	T/T	.	T/T	.	.	.	.	T/T	.	T/T	.	T/T	.
Pv10	2538255	ANNZ01031212-1_4305	A	G	.	G/G	.	A/A	G/G	A/A	A/A	G/G	A/G	A/G	G/G	A/A	G/G	A/A	A/A	A/A	G/G	G/G	G/G	G/G	A/A	G/G	A/A	A/A	A/A	A/A	G/G	A/A	A/A	A/A	A/A	G/G	A/A	G/G	A/A	G/G	G/G	.	.	A/A	G/G	A/A	A/A	A/A	A/A
Pv10	2706652	ANNZ01031220-1_24765	G	A	.	G/G	.	G/G	G/G	G/G	G/G	A/A	G/G	G/A	G/G	G/G	G/G	G/G	G/G	G/G	G/G	A/A	A/A	G/G	G/G	G/G	A/A	G/G	G/G	.	G/G	G/G	G/G	G/G	G/G	G/G	G/G	G/G	G/G	G/G	G/G	.	.	G/G	G/G	G/G	G/G	G/G	G/G
Pv10	2922632	ANNZ01031227-1_69284	T	C	.	T/T	T/T	T/T	T/T	T/T	T/T	T/T	T/T	T/T	T/T	T/T	T/T	T/T	T/T	T/T	T/T	T/T	T/T	T/T	T/T	T/T	T/T	T/T	T/T	T/T	T/T	T/T	T/T	T/T	T/T	T/T	T/T	T/T	C/C	T/T	T/T	T/T	T/T	T/T	T/T	T/T	T/T	C/C	T/T
Pv10	3371713	ANNZ01031237-1_476	G	A	.	A/A	G/G	G/G	G/G	A/A	G/G	G/G	G/A	G/G	G/G	G/G	G/G	G/G	G/G	G/G	G/G	G/G	G/G	A/A	G/G	A/A	G/G	.	G/G	G/A	G/G	G/G	G/G	G/G	G/G	A/A	G/G	A/A	G/G	A/A	A/A	G/G	G/G	G/G	G/G	G/G	G/G	G/G	G/G
Pv10	3784903	ANNZ01031253-1_64034	C	A	.	A/A	.	A/A	.	A/A	C/C	C/C	A/A	C/C	C/C	C/C	A/A	C/C	A/A	A/A	C/C	C/C	C/C	A/A	C/A	A/A	C/C	C/C	C/C	.	C/C	A/A	A/A	C/C	A/A	A/A	C/C	A/A	C/C	A/A	A/A	.	.	A/A	A/A	C/C	A/A	C/C	A/A
Pv10	3938141	ANNZ01031258-1_7241	T	G	.	T/T	.	G/G	G/G	G/G	T/T	G/G	G/G	T/G	G/G	T/T	G/G	T/T	G/G	G/G	G/G	.	.	G/G	T/G	G/G	G/G	G/G	T/T	.	G/G	G/G	G/G	T/T	G/G	G/G	T/T	G/G	T/T	G/G	G/G	.	.	G/G	G/G	T/T	G/G	T/T	G/G
Pv10	4125263	ANNZ01031267-1_12302	C	A	.	.	C/C	A/A	A/A	A/A	C/C	A/A	A/A	C/A	A/A	C/C	A/A	C/C	A/A	A/A	A/A	C/A	C/A	A/A	C/A	A/A	A/A	A/A	C/C	C/C	A/A	A/A	A/A	C/C	A/A	A/A	C/C	A/A	C/C	A/A	A/A	C/A	C/C	A/A	A/A	C/C	A/A	C/C	A/A
Pv10	4237056	ANNZ01031276-1_16309	A	G	.	.	.	G/G	.	G/G	A/A	.	G/G	A/G	.	A/A	G/G	A/A	G/G	G/G	G/G	G/G	G/G	G/G	G/G	G/G	.	.	A/A	.	.	G/G	G/G	A/A	G/G	G/G	.	A/G	A/A	G/G	G/G	.	.	G/G	G/G	A/A	G/G	A/A	G/G
Pv10	4796090	ANNZ01031308-1_45847	G	A	.	G/G	G/G	G/G	G/G	A/A	A/A	A/A	G/G	A/A	A/A	A/A	A/A	A/A	A/A	G/G	A/A	G/G	G/G	G/G	G/A	G/G	A/A	A/A	A/A	G/G	G/G	G/G	G/G	A/A	A/A	G/G	A/A	A/A	A/A	G/G	G/G	G/G	G/G	G/G	G/G	A/A	A/A	A/A	G/G
Pv10	4957015	ANNZ01031322-1_29016	G	A	.	G/G	.	G/G	G/G	G/G	G/G	A/A	G/A	G/G	A/A	G/G	G/G	G/G	A/A	G/G	A/A	G/G	G/G	A/A	G/G	A/A	A/A	G/G	G/G	.	G/G	G/G	G/G	G/G	G/G	A/A	G/G	G/G	G/G	A/A	A/A	.	.	G/G	G/G	G/G	G/G	G/G	G/G
Pv10	5160493	ANNZ01031350-1_45611	C	A	.	C/C	C/C	C/C	C/C	.	.	C/C	C/C	C/C	C/C	.	.	C/A	C/C	C/C	C/C	C/C	C/C	C/C	C/C	C/C	C/C	.	C/A	C/C	C/C	C/C	C/C	.	C/C	C/C	.	.	.	C/C	C/C	C/C	C/C	C/C	C/C	.	C/C	.	C/C
Pv10	5515940	ANNZ01031365-1_48995	G	A	.	G/G	.	G/G	G/G	G/G	G/G	G/G	G/G	G/G	.	G/G	G/G	G/G	.	G/G	G/G	G/G	G/G	.	G/G	.	.	G/G	G/G	.	G/G	G/G	.	G/G	.	G/A	G/G	G/G	G/G	.	.	.	.	G/G	.	G/G	.	G/G	G/G
Pv10	5713944	ANNZ01031384-1_3289	C	T	.	C/C	C/C	C/C	C/C	C/C	C/C	C/C	C/T	C/C	T/T	C/C	C/C	C/C	T/T	C/C	C/C	C/C	C/C	T/T	C/C	T/T	T/T	C/C	C/C	C/C	T/T	C/C	T/T	C/C	T/T	T/T	C/C	C/C	C/C	T/T	T/T	C/C	C/C	C/C	T/T	C/C	T/T	C/C	C/C
Pv10	5953449	ANNZ01031401-1_9539	G	A	.	G/G	.	G/G	G/G	G/G	G/G	G/G	G/A	G/A	G/G	G/G	G/G	G/G	G/G	G/G	G/G	A/A	A/A	A/A	G/G	G/G	G/G	G/G	G/G	.	G/G	G/G	G/G	G/G	G/G	A/A	G/G	G/G	G/G	G/G	A/A	.	.	G/G	G/G	G/G	G/G	G/G	G/G
Pv10	6198083	ANNZ01031411-1_5292	T	C	.	T/T	.	C/C	T/T	T/T	T/T	T/T	T/T	T/T	T/T	T/T	T/T	T/T	T/T	C/C	T/T	T/T	T/T	T/T	T/T	T/T	T/T	T/T	T/T	.	C/C	C/C	C/C	T/T	C/C	T/T	T/T	T/T	T/T	T/T	C/C	.	.	C/C	C/C	T/T	C/C	T/T	T/T
Pv10	6367592	ANNZ01031425-1_28553	A	G	.	G/G	.	G/G	G/G	A/A	A/A	G/G	A/G	A/A	A/A	A/A	A/A	A/A	A/A	G/G	G/G	A/A	A/A	A/A	A/A	A/A	A/A	A/A	A/A	.	G/G	A/A	G/G	A/A	G/G	A/A	A/A	A/A	A/A	A/A	G/G	.	.	G/G	G/G	A/A	G/G	A/A	A/A
Pv10	6514684	ANNZ01031433-1_16174	T	C	.	C/C	.	C/C	C/C	T/T	T/T	C/C	T/C	T/C	T/T	T/T	T/T	T/T	T/T	C/C	C/C	C/C	C/C	T/T	T/T	T/T	T/T	T/T	T/T	.	C/C	.	C/C	T/T	C/C	T/T	T/T	T/T	T/T	T/T	C/C	.	.	C/C	C/C	T/T	C/C	T/T	T/T
Pv10	7159541	ANNZ01031467-1_18754	C	T	.	T/T	.	T/T	T/T	C/C	C/C	T/T	T/T	C/T	C/C	T/T	C/C	T/T	T/T	T/T	T/T	T/T	T/T	T/T	C/C	C/C	C/C	T/T	C/C	.	T/T	T/T	T/T	C/C	T/T	T/T	C/C	T/T	C/C	C/C	T/T	.	.	T/T	T/T	C/C	T/T	C/C	C/C
Pv10	7726934	ANNZ01031503-1_1471	G	A	.	G/G	.	A/A	G/G	G/G	G/G	G/G	G/G	G/A	G/G	G/G	G/G	A/A	G/G	A/A	G/G	G/G	G/G	G/G	G/G	G/G	G/G	G/G	G/G	.	A/A	.	G/G	G/G	A/A	G/G	G/G	G/G	G/G	G/G	A/A	.	.	A/A	G/G	G/G	A/A	G/G	G/G
Pv10	8078754	ANNZ01031525-1_7697	T	C	.	T/T	T/T	T/T	T/T	T/T	T/T	T/T	T/C	T/C	T/T	T/T	T/T	C/C	T/T	T/T	T/T	T/T	T/T	T/T	T/T	T/T	T/T	T/T	T/T	T/T	C/C	C/C	T/T	T/T	C/C	T/T	T/T	T/T	T/T	T/T	C/C	T/T	T/T	T/T	T/T	T/T	C/C	T/T	T/T
Pv10	8246266	ANNZ01031539-1_12084	G	T	.	G/G	G/G	T/T	G/G	G/G	G/G	G/G	G/G	G/G	G/G	G/G	G/G	T/T	G/G	T/T	G/G	G/G	G/G	G/G	G/G	G/G	G/G	G/G	G/G	G/G	T/T	G/G	G/G	G/G	T/T	G/G	G/G	G/G	G/G	G/G	T/T	G/G	G/G	T/T	G/G	G/G	T/T	G/G	G/G
Pv10	8943848	ANNZ01031593-1_20104	G	A	.	G/G	.	G/G	G/G	G/G	G/G	G/G	G/A	G/A	A/A	A/A	A/A	G/G	G/G	G/G	G/G	G/G	G/G	A/A	G/G	A/A	A/A	A/A	G/G	.	G/G	G/G	A/A	G/G	G/G	A/A	G/G	G/G	G/G	A/A	G/G	.	.	G/G	A/A	G/G	G/G	G/G	G/G
Pv10	9392075	ANNZ01031638-1_1902	G	C;T	.	G/G	.	.	G/G	G/G	G/G	G/G	G/G	G/G	G/G	G/G	G/G	G/G	G/G	G/G	G/G	G/G	.	G/G	G/G	G/G	.	G/G	G/G	.	G/G	G/G	G/G	G/G	G/G	G/G	G/G	G/G	T/T	.	.	.	.	.	G/G	G/G	G/T	T/T	G/G
Pv10	9454604	ANNZ01031641-1_36827	C	T	.	.	.	C/C	C/C	C/C	T/T	C/C	C/C	C/C	C/C	C/C	C/C	T/T	C/C	C/C	C/C	C/C	C/C	C/C	C/T	C/C	C/C	C/C	T/T	.	C/C	C/C	.	C/C	C/C	C/C	C/C	C/C	T/T	C/C	C/C	.	.	C/C	.	T/T	C/C	T/T	T/T
Pv10	9729049	ANNZ01031663-1_32462	G	A	.	A/A	A/A	A/A	A/A	G/G	G/G	A/A	A/A	G/A	A/A	A/A	A/A	G/G	A/A	A/A	A/A	A/A	A/A	A/A	G/A	A/A	A/A	A/A	G/G	.	A/A	A/A	A/A	A/A	A/A	A/A	A/A	G/G	G/G	A/A	A/A	.	.	A/A	A/A	G/G	A/A	G/G	G/G
Pv10	10296180	ANNZ01031694-1_18587	A	G	.	A/A	.	A/A	G/G	A/A	A/A	A/A	A/A	A/A	A/A	A/A	A/A	A/A	A/A	A/A	A/A	A/A	A/A	A/A	A/A	A/A	A/A	A/A	A/A	.	A/A	.	A/A	A/A	A/A	A/A	A/A	A/A	A/A	A/A	A/A	.	.	A/A	A/A	A/A	A/A	A/A	A/A
Pv10	11122095	ANNZ01031754-1_18966	A	G	.	G/G	.	A/A	A/A	A/A	A/A	A/A	A/G	A/A	A/A	A/A	A/A	A/A	A/A	A/A	A/A	A/A	A/A	A/A	A/A	A/A	A/A	A/A	A/A	.	A/A	.	A/A	A/A	A/A	A/A	A/A	A/A	A/A	A/A	A/A	.	.	A/A	A/A	A/A	A/A	A/A	A/A
Pv10	11568292	ANNZ01031786-1_10851	G	A	.	A/A	.	G/G	G/G	G/G	G/G	G/G	G/A	G/G	G/G	G/G	G/G	G/G	G/G	G/G	G/G	G/G	G/G	G/G	G/G	G/G	G/G	G/G	G/G	.	G/G	.	G/G	G/G	G/G	G/G	G/G	G/G	G/G	G/G	G/G	.	.	G/G	G/G	G/G	G/G	G/G	G/G
Pv10	11995247	ANNZ01031823-1_2623	C	.	.	C/C	.	.	.	C/C	C/C	.	C/C	C/C	C/C	C/C	C/C	C/C	.	.	.	.	.	C/C	C/C	C/C	C/C	C/C	C/C	.	.	.	.	C/C	.	C/C	C/C	C/C	C/C	C/C	.	.	.	.	.	.	.	C/C	C/C
Pv10	12628618	ANNZ01031858-1_6463	C	T	.	C/C	.	C/C	C/C	C/C	C/C	C/C	C/C	C/C	C/C	C/C	C/C	C/C	T/T	C/C	T/T	C/C	C/C	C/C	C/C	C/C	C/C	C/C	C/C	.	T/T	.	C/C	C/C	C/C	C/C	C/C	C/C	C/C	C/C	C/C	.	.	C/C	C/C	C/C	C/C	C/C	C/C
Pv10	13797825	ANNZ01032047-1_2869	C	T	.	C/C	.	C/C	C/C	C/C	C/C	C/C	C/C	C/C	C/C	C/C	C/C	C/C	C/C	C/C	C/C	C/C	.	C/C	C/C	C/C	C/C	.	C/C	.	C/C	C/C	C/C	C/C	C/C	C/C	C/C	C/C	C/C	C/C	C/C	.	.	C/C	C/C	C/C	C/C	C/C	C/C
Pv10	14484177	ANNZ01032171-1_21525	A	G	.	G/G	.	G/G	G/G	A/A	A/A	G/G	A/A	A/A	A/A	A/A	A/A	A/A	G/G	G/G	G/G	A/A	G/G	A/A	A/A	A/A	A/A	A/A	A/A	.	G/G	G/G	G/G	A/A	G/G	A/A	A/A	A/A	A/A	A/A	G/G	.	.	G/G	G/G	A/A	G/G	A/A	A/A
Pv10	14834633	ANNZ01032227-1_36944	T	C	.	C/C	.	C/C	C/C	T/T	T/T	C/C	T/T	T/T	T/T	T/T	T/T	T/T	C/C	C/C	C/C	C/C	C/C	T/T	T/T	T/T	T/T	T/T	T/T	.	C/C	C/C	C/C	T/T	C/C	T/T	T/T	T/T	T/T	T/T	C/C	.	.	C/C	C/C	T/T	C/C	T/T	T/T
Pv10	15109834	ANNZ01032265-1_11677	A	G	.	G/G	.	G/G	G/G	A/A	.	G/G	A/G	A/G	A/A	A/A	A/A	A/A	G/G	G/G	G/G	G/G	G/G	A/A	A/A	A/A	A/A	A/A	A/A	.	G/G	A/A	G/G	A/A	G/G	A/A	A/A	A/A	A/A	A/A	G/G	.	.	G/G	G/G	.	G/G	A/A	A/A
Pv10	16124481	ANNZ01032448-1_12361	G	A	.	A/A	.	A/A	A/A	G/G	G/G	A/A	G/A	G/A	G/G	G/G	G/G	G/G	A/A	A/A	A/A	A/A	A/A	G/G	G/G	G/G	G/G	G/G	G/G	.	A/A	G/G	A/A	G/G	A/A	G/G	G/G	G/G	G/G	G/G	A/A	.	.	A/A	A/A	G/G	A/A	G/G	G/G
Pv10	16967700	ANNZ01032545-1_2408	T	C	.	T/T	.	T/T	T/T	T/T	T/T	T/T	T/T	T/T	T/T	T/T	T/T	T/T	C/C	T/T	C/C	T/T	T/T	T/T	T/T	T/T	T/T	T/T	T/T	.	C/C	T/T	T/T	T/T	T/T	T/T	T/T	T/T	T/T	T/T	T/T	.	.	T/T	T/T	T/T	T/T	T/T	T/T
Pv10	17313228	ANNZ01032577-1_6783	A	G	.	A/A	A/A	A/A	A/A	A/A	A/A	A/A	A/A	A/A	A/A	A/A	A/A	A/A	G/G	A/A	G/G	A/A	A/A	A/A	A/A	A/A	A/A	A/A	A/A	A/A	G/G	A/A	A/A	A/A	A/A	A/A	A/A	A/A	A/A	A/A	A/A	A/A	A/A	A/A	A/A	A/A	A/A	A/A	A/A
Pv10	17458375	ANNZ01032600-1_25303	G	T	.	T/T	.	T/T	T/T	G/G	G/G	T/T	G/T	G/T	G/G	G/G	G/G	G/G	G/G	T/T	G/G	T/T	T/T	G/G	G/G	G/G	G/G	G/G	G/G	.	G/G	T/T	T/T	G/G	T/T	G/G	G/G	G/G	G/G	G/G	T/T	.	.	T/T	T/T	G/G	T/T	G/G	G/G
Pv10	18064959	ANNZ01032706-1_3159	G	A	.	A/A	.	A/A	A/A	G/G	G/G	A/A	G/A	G/A	G/G	G/G	G/G	G/G	G/G	A/A	G/G	A/A	A/A	G/G	G/G	G/G	G/G	G/G	G/G	.	G/G	A/A	A/A	G/G	A/A	G/G	G/G	G/G	G/G	G/G	A/A	.	.	A/A	A/A	G/G	A/A	G/G	G/G
Pv10	18214129	ANNZ01032723-1_17422	G	A	.	G/G	G/G	G/G	G/G	G/G	G/G	G/G	G/G	G/G	G/G	G/G	G/G	G/G	A/A	G/G	A/A	G/G	G/G	G/G	G/G	G/G	G/G	G/G	G/G	G/A	A/A	G/G	G/G	G/G	G/G	G/G	G/G	G/G	G/G	G/G	G/G	G/G	G/A	G/G	G/G	G/G	G/G	G/G	G/G
Pv10	19194497	ANNZ01032806-1_29491	G	T	.	T/T	.	G/G	T/T	G/G	G/G	G/G	G/T	G/G	G/G	G/G	G/G	G/G	G/G	G/G	G/G	T/T	T/T	G/G	G/G	G/G	G/G	G/G	G/G	.	G/G	G/G	G/G	G/G	G/G	G/G	G/G	G/G	G/G	G/G	G/G	.	.	G/G	G/G	G/G	G/G	G/G	G/G
Pv10	19316667	ANNZ01032815-1_13990	C	T	.	C/C	C/C	T/T	C/C	C/C	C/C	T/T	C/C	C/T	C/C	C/C	C/C	C/C	T/T	T/T	T/T	C/C	C/C	C/C	C/C	C/C	C/C	C/C	C/C	C/C	T/T	T/T	T/T	C/C	T/T	C/C	C/C	C/C	C/C	C/C	T/T	C/C	C/C	T/T	T/T	C/C	T/T	C/C	C/C
Pv10	19541108	ANNZ01032846-1_895	C	T	.	C/C	.	T/T	C/C	C/C	C/C	T/T	C/C	C/T	C/C	C/C	C/C	C/C	T/T	T/T	T/T	C/C	C/C	C/C	C/C	C/C	C/C	C/C	C/C	.	T/T	T/T	T/T	C/C	T/T	C/C	C/C	C/C	C/C	C/C	T/T	.	.	T/T	T/T	C/C	T/T	C/C	C/C
Pv10	19760331	ANNZ01032872-1_34481	G	A	.	A/A	.	G/G	A/A	G/G	G/G	G/G	G/A	G/G	G/G	G/G	G/G	G/G	G/G	G/G	G/G	A/A	A/A	G/G	G/G	G/G	G/G	G/G	G/G	.	G/G	G/G	G/G	G/G	G/G	G/G	G/G	G/G	G/G	G/G	G/G	.	.	G/G	G/G	G/G	G/G	G/G	G/G
Pv10	20122766	ANNZ01032912-1_7065	C	T	.	C/C	.	T/T	C/C	C/C	C/C	T/T	C/C	C/T	C/C	C/C	C/C	C/C	T/T	T/T	T/T	C/C	C/C	C/C	C/C	C/C	C/C	C/C	C/C	.	T/T	T/T	T/T	C/C	T/T	C/C	C/C	C/C	C/C	C/C	T/T	.	.	T/T	T/T	C/C	T/T	C/C	C/C
Pv10	20381990	ANNZ01032950-1_1874	C	T	.	C/C	.	T/T	C/C	C/C	C/C	T/T	C/C	C/T	C/C	C/C	C/C	C/C	T/T	T/T	T/T	C/C	C/C	C/C	C/C	C/C	C/C	C/C	C/C	.	T/T	T/T	T/T	C/C	T/T	C/C	C/C	C/C	C/C	C/C	T/T	.	.	C/T	T/T	C/C	T/T	C/C	C/C
Pv10	20935383	ANNZ01033050-1_9357	C	T	.	T/T	.	C/C	T/T	C/C	C/C	C/C	C/T	C/C	C/C	C/C	C/C	C/C	C/C	C/C	C/C	T/T	T/T	C/C	C/C	C/C	C/C	C/C	C/C	.	C/C	C/C	C/C	C/C	C/C	C/C	C/C	C/C	C/C	C/C	C/C	.	.	C/C	C/C	C/C	C/C	C/C	C/C
Pv10	21007220	ANNZ01033058-1_25048	C	T	.	T/T	.	C/C	T/T	C/C	C/C	C/C	C/T	C/C	C/C	C/C	C/C	C/C	C/C	C/C	C/C	T/T	T/T	C/C	C/C	C/C	C/C	C/C	C/C	.	C/C	C/C	C/C	C/C	C/C	C/C	C/C	C/C	C/C	C/C	C/C	.	.	C/C	C/C	C/C	C/C	C/C	C/C
Pv10	21281421	ANNZ01033104-1_10527	G	A	.	G/G	.	A/A	G/G	G/G	G/G	A/A	G/G	G/A	G/G	G/G	G/G	G/G	A/A	A/A	A/A	G/G	G/G	G/G	G/G	G/G	G/G	G/G	G/G	.	A/A	A/A	A/A	G/G	A/A	G/G	G/G	G/G	G/G	G/G	A/A	.	.	A/A	A/A	G/G	A/A	G/G	G/G
Pv10	21438510	ANNZ01033123-1_3546	C	T	.	C/C	.	T/T	C/C	C/C	C/C	T/T	C/C	C/T	C/C	C/C	C/C	C/C	T/T	T/T	T/T	C/C	C/C	C/C	C/C	C/C	C/C	C/C	C/C	.	T/T	T/T	T/T	C/C	T/T	C/C	C/C	C/C	C/C	C/C	T/T	.	.	T/T	T/T	C/C	T/T	C/C	C/C
Pv10	21919010	ANNZ01033195-1_3762	G	A	.	A/A	.	A/A	A/A	G/G	G/G	A/A	G/A	G/A	G/G	G/G	G/G	G/G	A/A	A/A	A/A	A/A	A/A	G/G	G/G	G/G	G/G	G/G	G/G	.	.	.	A/A	G/G	A/A	G/G	G/G	G/G	G/G	G/G	A/A	.	.	A/A	A/A	G/G	A/A	G/G	G/G
Pv10	22156930	ANNZ01033228-1_25877	T	C	.	T/C	.	T/C	T/C	T/C	T/C	T/C	T/C	T/C	T/C	T/C	T/C	T/C	T/C	T/C	T/C	T/C	T/C	T/C	T/C	T/C	T/C	T/C	T/C	.	C/C	C/C	T/C	T/C	T/C	T/C	T/C	T/C	T/C	T/C	T/C	.	.	T/C	T/C	T/C	T/C	T/C	T/C
Pv10	22286354	ANNZ01033240-1_31625	G	A	.	A/A	.	A/A	A/A	G/G	G/G	A/A	G/A	G/A	G/G	G/G	G/G	G/G	A/A	A/A	A/A	A/A	A/A	G/G	G/G	G/G	G/G	G/G	G/G	.	.	G/G	A/A	G/G	A/A	G/G	G/G	G/G	G/G	G/G	A/A	.	.	A/A	A/A	G/G	A/A	G/G	G/G
Pv10	22917511	ANNZ01033331-1_35250	G	A	.	A/A	.	A/A	A/A	G/G	G/G	A/A	G/A	G/A	G/G	G/G	G/G	G/G	A/A	A/A	A/A	A/A	A/A	G/G	G/G	G/G	G/G	G/G	G/G	.	A/A	.	A/A	G/G	A/A	G/G	G/G	G/G	G/G	G/G	A/A	.	.	A/A	A/A	G/G	A/A	G/G	G/G
Pv10	23045801	ANNZ01033336-1_74259	T	G	.	.	.	.	.	.	.	.	.	.	.	.	.	.	.	.	.	.	.	.	.	.	.	.	.	.	.	.	.	.	.	.	.	.	.	.	.	.	.	.	.	.	.	.	.
Pv10	24395896	ANNZ01033472-1_22840	C	T	.	C/C	.	T/T	C/C	C/C	C/C	T/T	C/C	C/T	C/C	C/C	C/C	C/C	T/T	T/T	T/T	C/C	C/C	C/C	C/C	C/C	C/C	C/C	C/C	.	T/T	T/T	T/T	C/C	T/T	C/C	C/C	C/C	C/C	C/C	T/T	.	.	T/T	T/T	C/C	T/T	C/C	C/C
Pv10	24564552	ANNZ01033495-1_8790	C	T	.	C/C	.	T/T	C/C	C/C	C/C	T/T	C/C	C/T	C/C	C/C	C/C	C/C	T/T	T/T	T/T	C/C	C/C	C/C	C/C	C/C	C/C	C/C	C/C	.	T/T	T/T	T/T	C/C	T/T	C/C	C/C	C/C	C/C	C/C	T/T	.	.	T/T	T/T	C/C	T/T	C/C	C/C
Pv10	24784884	ANNZ01033519-1_19652	C	T	.	T/T	C/C	C/C	T/T	C/C	C/C	C/C	C/T	C/C	C/C	C/C	C/C	C/C	C/C	C/C	C/C	T/T	T/T	C/C	C/C	C/C	C/C	C/C	C/C	C/C	C/C	C/C	C/C	C/C	C/C	C/C	C/C	C/C	C/C	C/C	C/C	C/C	C/C	C/C	C/C	C/C	C/C	C/C	C/C
Pv10	24910594	ANNZ01033539-1_5984	C	T	.	T/T	.	C/C	T/T	C/C	C/C	C/C	C/T	C/C	C/C	C/C	C/C	C/C	C/C	C/C	C/C	T/T	T/T	C/C	C/C	C/C	C/C	C/C	C/C	.	C/C	C/C	C/C	C/C	C/C	C/C	C/C	C/C	C/C	C/C	C/C	.	.	C/C	C/C	C/C	C/C	C/C	C/C
Pv10	25599631	ANNZ01033683-1_1804	C	A	.	C/C	.	A/A	C/C	C/C	C/C	A/A	C/C	C/A	C/C	C/C	C/C	C/C	A/A	A/A	A/A	C/C	C/C	C/C	C/C	C/C	C/C	C/C	C/C	.	A/A	A/A	A/A	C/C	A/A	C/C	C/C	C/C	C/C	C/C	A/A	.	.	A/A	A/A	C/C	A/A	C/C	C/C
Pv10	25749664	ANNZ01033700-1_4137	G	A	.	A/A	.	G/G	A/A	G/G	G/G	G/G	G/A	G/G	G/G	G/G	G/G	G/G	G/G	G/G	G/G	A/A	A/A	G/G	G/G	G/G	G/G	G/G	G/G	.	G/G	G/G	G/G	G/G	G/G	G/G	G/G	G/G	G/G	G/G	G/G	.	.	G/G	G/G	G/G	G/G	G/G	G/G
Pv10	26364896	ANNZ01033777-1_3779	A	C	.	A/A	.	A/A	A/A	A/A	A/A	A/A	A/A	A/A	A/A	A/A	A/A	A/A	A/A	A/A	A/A	A/A	A/A	A/A	A/A	A/A	A/A	A/A	A/A	.	A/A	A/A	A/A	A/A	A/A	A/A	A/A	A/A	A/A	A/A	A/A	.	.	A/A	A/A	A/A	A/A	A/A	A/A
Pv10	26685548	ANNZ01033815-1_27819	C	T	.	C/C	C/C	C/C	C/C	C/C	C/C	C/C	C/C	C/C	C/C	C/C	C/C	C/C	C/C	C/C	C/C	C/C	C/C	C/C	C/C	C/C	C/C	C/C	C/C	.	C/C	C/C	C/C	C/C	C/C	C/C	C/C	C/C	C/C	C/C	C/C	.	.	C/C	C/C	C/C	C/C	C/C	C/C
Pv10	29599395	ANNZ01034309-1_47679	T	C	.	C/C	.	T/T	C/C	T/T	T/T	T/T	T/C	T/T	T/T	T/T	T/T	T/T	T/T	T/T	T/T	C/C	C/C	T/T	T/T	T/T	T/T	T/T	T/T	.	T/T	T/T	T/T	T/T	T/T	T/T	T/T	T/T	T/T	T/T	T/T	.	.	T/T	T/T	T/T	T/T	T/T	T/T
Pv10	29643855	ANNZ01034311-1_18879	CC	CGC;GC	.	GC/GC	.	CGC/CGC	GC/GC	CC/CC	CC/CC	CGC/CGC	CC/GC	CC/CGC	CC/CC	CC/CC	CC/CC	CC/CC	CGC/CGC	CGC/CGC	CGC/CGC	CC/GC	GC/GC	CC/CC	CC/CC	CC/CC	CC/CC	CC/CC	CC/CC	.	CGC/CGC	CGC/CGC	CGC/CGC	CC/CC	CGC/CGC	CC/CC	CC/CC	CC/CC	CC/CC	CC/CC	CGC/CGC	.	.	CGC/CGC	CGC/CGC	CC/CC	CGC/CGC	CC/CC	CC/CC
Pv10	29930293	ANNZ01034349-1_31951	G	A	.	A/A	.	G/G	A/A	G/G	G/G	G/G	G/A	G/G	G/G	G/G	G/G	G/G	G/G	G/G	G/G	A/A	A/A	G/G	G/G	G/G	G/G	G/G	G/G	.	G/G	G/G	G/G	G/G	G/G	G/G	G/G	G/G	G/G	G/G	G/G	.	.	G/G	G/G	G/G	G/G	G/G	G/G
Pv10	30148907	ANNZ01034363-1_9533	T	C	.	T/T	.	C/C	T/T	.	.	C/C	T/T	T/C	T/T	T/T	T/T	T/T	C/C	C/C	C/C	.	.	T/T	T/T	T/T	.	.	T/T	.	C/C	C/C	C/C	T/T	C/C	T/T	T/T	T/T	.	T/T	C/C	.	.	.	C/C	.	C/C	.	T/T
Pv10	30258954	ANNZ01034371-1_10455	T	C	.	T/T	.	C/C	T/T	T/T	T/T	C/C	T/T	T/C	T/T	T/T	T/T	T/T	C/C	C/C	C/C	T/T	T/T	T/T	T/T	T/T	T/T	T/T	T/T	.	C/C	C/C	C/C	T/T	C/C	T/T	T/T	T/T	T/T	T/T	C/C	.	.	C/C	C/C	T/T	C/C	T/T	T/T
Pv10	30551739	ANNZ01034401-1_82461	C	T	.	T/T	.	C/C	T/T	C/C	C/C	C/C	C/T	C/C	C/C	C/C	C/C	C/C	C/C	C/C	C/C	T/T	T/T	C/C	C/C	C/C	C/C	C/C	C/C	.	C/C	C/C	C/C	C/C	C/C	C/C	C/C	C/C	C/C	C/C	C/C	.	.	C/C	C/C	C/C	C/C	C/C	C/C
Pv10	30873426	ANNZ01034460-1_11755	C	T	.	C/C	.	T/T	C/C	C/C	C/C	T/T	C/C	C/T	C/C	C/C	C/C	C/C	T/T	T/T	T/T	C/C	C/C	C/C	C/C	C/C	C/C	C/C	C/C	.	T/T	T/T	T/T	C/C	T/T	C/C	C/C	C/C	C/C	C/C	T/T	.	.	T/T	T/T	C/C	T/T	C/C	C/C
Pv10	35061649	ANNZ01034865-1_20737	C	T	.	T/T	.	C/C	C/C	C/C	T/T	C/C	C/C	C/C	C/C	C/C	C/C	T/T	C/C	C/C	C/C	C/C	C/C	C/C	C/T	C/C	C/C	C/C	T/T	.	C/C	C/C	C/C	C/C	C/C	C/C	C/C	C/C	T/T	C/C	C/C	.	.	C/C	C/C	T/T	C/C	T/T	C/C
Pv10	35772611	ANNZ01034901-1_6260	C	T	.	C/C	C/C	C/C	C/C	C/C	T/T	C/C	C/C	C/C	C/C	C/C	C/C	T/T	C/C	C/C	C/C	C/C	C/C	C/C	C/T	C/C	C/C	C/C	T/T	C/C	C/C	C/C	C/C	C/C	C/C	C/C	C/C	C/C	T/T	C/C	C/C	C/C	C/C	C/C	C/C	T/T	C/C	T/T	C/C
Pv10	35841404	ANNZ01034905-1_20907	C	A	.	C/C	.	C/C	C/C	C/C	A/A	C/C	C/C	C/C	C/C	C/C	C/C	A/A	C/C	C/C	C/C	C/C	C/C	C/C	C/A	C/C	C/C	C/C	A/A	.	C/C	C/C	C/C	C/C	C/C	C/C	C/C	C/C	A/A	C/C	C/C	.	.	.	C/C	A/A	C/C	A/A	C/C
Pv10	37989134	ANNZ01035063-1_115400	C	A	.	A/A	.	A/A	A/A	C/C	C/C	A/A	C/A	C/A	C/C	C/C	C/C	C/C	A/A	A/A	A/A	A/A	A/A	C/C	C/C	C/C	C/A	C/C	C/C	.	A/A	A/A	A/A	C/C	A/A	C/C	C/C	C/C	A/A	C/C	A/A	.	.	C/A	A/A	C/C	A/A	A/A	A/A
Pv10	38153225	ANNZ01035064-1_81472	A	G	.	G/G	A/A	G/G	G/G	A/A	A/A	G/G	A/G	A/G	A/A	A/A	A/A	A/A	G/G	G/G	G/G	G/G	G/G	A/A	A/A	A/A	A/A	A/A	A/A	A/A	G/G	G/G	G/G	A/A	G/G	A/A	A/A	A/A	G/G	A/A	G/G	A/A	A/A	A/A	G/G	A/A	G/G	G/G	A/A
Pv10	38359829	ANNZ01035075-1_35285	C	T	.	T/T	.	T/T	T/T	C/C	C/C	T/T	C/C	C/C	C/C	C/C	C/C	C/C	T/T	T/T	T/T	.	T/T	C/C	C/C	C/C	C/C	C/C	T/T	.	T/T	T/T	T/T	C/C	T/T	C/C	C/C	C/T	C/T	C/C	T/T	.	.	C/C	T/T	C/C	T/T	C/T	C/C
Pv10	38455127	ANNZ01035080-1_11042	C	T	.	T/T	T/T	T/T	T/T	C/C	C/C	T/T	C/T	C/T	T/T	C/C	C/C	C/C	T/T	T/T	T/T	T/T	T/T	C/C	C/C	T/T	T/T	C/C	C/C	T/T	T/T	T/T	T/T	C/C	T/T	C/C	C/C	T/T	T/T	T/T	T/T	T/T	T/T	T/T	T/T	C/C	T/T	T/T	C/C
Pv10	38721044	ANNZ01035098-1_17561	A	G	.	A/A	.	G/G	G/G	A/A	A/A	G/G	A/G	A/G	G/G	A/A	A/A	A/A	G/G	G/G	G/G	A/A	A/A	A/A	A/A	G/G	G/G	A/A	A/A	.	G/G	G/G	G/G	A/A	G/G	A/A	A/A	G/G	G/G	G/G	G/G	.	.	G/G	G/G	A/A	G/G	G/G	A/A
Pv10	38996938	ANNZ01035120-1_12648	G	A	.	G/G	G/G	G/G	G/G	G/G	G/G	G/G	G/G	G/G	G/G	G/G	G/G	A/A	G/G	G/G	G/G	G/G	G/G	G/G	G/A	G/G	G/G	G/G	A/A	G/G	G/G	G/G	G/G	A/A	G/G	G/G	G/G	G/G	G/G	G/G	G/G	G/G	G/G	G/G	G/G	A/A	G/G	G/G	G/A
Pv10	39191320	ANNZ01035134-1_27856	C	T	.	T/T	T/T	C/C	T/T	C/C	C/C	T/T	C/C	C/C	T/T	C/C	C/C	C/C	T/T	C/C	T/T	C/C	C/C	C/C	C/C	T/T	T/T	C/C	C/C	T/T	T/T	C/C	T/T	C/C	T/T	C/C	C/C	T/T	T/T	C/C	T/T	T/T	T/T	C/C	C/C	C/C	T/T	T/T	C/C
Pv10	39386097	ANNZ01035137-1_140165	T	G	.	G/G	G/G	G/G	G/G	T/T	T/T	G/G	T/G	T/G	G/G	T/T	T/T	T/T	G/G	G/G	G/G	G/G	G/G	T/T	T/T	G/G	G/G	T/T	T/T	G/G	G/G	G/G	G/G	T/T	G/G	T/T	T/T	G/G	G/G	T/T	G/G	G/G	G/G	G/G	G/G	T/T	G/G	G/G	T/T
Pv10	39512428	ANNZ01035138-1_101245	A	G	.	G/G	.	G/G	G/G	A/A	A/A	G/G	A/G	A/G	G/G	A/A	A/A	A/A	G/G	G/G	G/G	G/G	G/G	A/A	A/A	G/G	G/G	A/A	A/A	.	G/G	G/G	G/G	A/A	G/G	A/A	A/A	G/G	G/G	A/A	G/G	.	.	G/G	G/G	A/A	G/G	G/G	A/A
Pv10	39660697	ANNZ01035142-1_56408	A	G	.	A/A	.	G/G	A/A	A/A	A/A	A/A	A/G	A/G	G/G	A/A	A/A	A/A	A/A	G/G	G/G	A/A	A/A	A/A	A/A	G/G	G/G	A/A	A/A	.	A/A	G/G	A/A	A/A	G/G	A/A	A/A	G/G	G/G	A/A	G/G	.	.	G/G	A/A	A/A	G/G	G/G	A/A
Pv10	39763642	ANNZ01035143-1_24988	A	C	.	C/C	C/C	C/C	C/C	A/A	A/A	C/C	A/C	A/C	C/C	A/A	A/A	A/A	C/C	C/C	C/C	C/C	C/C	A/A	A/A	C/C	C/C	A/A	A/A	C/C	C/C	C/C	C/C	A/A	C/C	A/A	A/A	C/C	C/C	A/A	C/C	C/C	C/C	C/C	C/C	A/A	C/C	C/C	A/A
Pv10	39913554	ANNZ01035147-1_10060	T	C	.	C/C	.	C/C	C/C	T/T	T/T	C/C	T/C	T/C	C/C	T/T	T/T	T/T	C/C	C/C	C/C	C/C	C/C	T/T	T/T	C/C	C/C	T/T	T/T	.	C/C	C/C	C/C	T/T	C/C	T/T	T/T	C/C	C/C	T/T	C/C	.	.	C/C	C/C	C/C	C/C	T/T	T/T
Pv10	40164787	ANNZ01035158-1_15479	G	T	.	T/T	G/G	T/T	T/T	T/T	T/T	T/T	T/T	T/T	G/G	G/G	T/T	T/T	T/T	T/T	T/T	T/T	T/T	T/T	T/T	G/G	G/G	G/G	T/T	G/G	T/T	T/T	T/T	T/T	G/G	T/T	T/T	G/G	T/T	T/T	T/T	G/G	G/G	T/T	T/T	T/T	G/G	T/T	T/T
Pv10	40295700	ANNZ01035169-1_27792	C	A	.	C/C	C/C	C/C	C/C	A/A	A/A	C/C	A/A	C/A	C/C	C/C	A/A	A/A	C/C	C/C	C/C	C/C	C/C	A/A	A/A	C/C	C/C	C/C	A/A	C/C	C/C	C/C	C/C	C/C	C/C	A/A	A/A	C/C	C/C	A/A	C/C	C/C	C/C	C/C	C/C	C/C	C/C	A/A	A/A
Pv10	40587960	ANNZ01035181-1_8815	A	G	.	G/G	G/G	G/G	G/G	A/A	A/A	G/G	A/A	A/G	G/G	A/A	A/A	A/A	G/G	G/G	G/G	G/G	G/G	A/A	A/A	G/G	G/G	A/A	A/A	G/G	G/G	G/G	G/G	G/G	G/G	A/A	A/A	G/G	G/G	A/A	G/G	G/G	G/G	G/G	G/G	G/G	G/G	A/A	A/A
Pv10	40972517	ANNZ01035200-1_16761	G	A	.	G/G	.	G/G	G/G	A/A	G/G	G/G	A/A	G/G	G/G	A/A	A/A	G/G	G/G	G/G	G/G	G/G	G/G	A/A	A/A	G/G	G/G	A/A	G/G	.	G/G	G/G	G/G	G/G	G/G	A/A	A/A	G/G	G/G	G/G	G/G	.	.	G/G	G/G	G/G	G/G	G/G	G/G
Pv10	41187296	ANNZ01035204-1_116651	T	C	.	C/C	T/C	C/C	T/T	T/T	T/T	C/C	T/T	T/C	T/T	T/T	T/T	T/T	T/T	T/C	T/T	C/C	C/C	T/T	T/T	T/T	T/T	T/T	T/T	T/T	T/T	C/C	C/C	C/C	T/T	T/T	T/T	T/T	C/C	T/T	T/T	T/C	T/C	C/C	C/C	C/C	T/T	T/T	T/T
Pv10	41362619	ANNZ01035212-1_11673	G	A	.	A/A	.	A/A	A/A	G/G	G/G	A/A	G/G	G/A	G/G	G/G	G/G	G/G	A/A	A/A	A/A	A/A	A/A	G/G	G/G	G/G	G/G	G/G	G/G	.	A/A	A/A	A/A	A/A	A/A	G/G	G/G	G/G	A/A	G/G	A/A	.	.	A/A	A/A	A/A	A/A	G/G	G/G
Pv10	41421400	ANNZ01035213-1_7067	A	C	.	C/C	.	C/C	C/C	A/A	A/A	C/C	A/A	A/C	A/A	A/A	A/A	A/A	C/C	A/C	C/C	C/C	C/C	A/A	A/A	A/A	A/A	A/A	A/A	.	C/C	C/C	C/C	C/C	C/C	A/A	A/A	A/A	C/C	A/A	C/C	.	.	C/C	C/C	C/C	C/C	A/A	A/A
Pv10	42515697	ANNZ01035234-1_88078	A	G	.	G/G	A/A	G/G	A/A	A/A	A/A	A/A	A/A	A/A	A/A	G/G	A/A	A/A	A/A	A/G	G/G	A/A	A/A	A/A	A/A	A/A	A/A	A/A	A/A	A/A	A/A	G/G	G/G	A/A	G/G	A/A	A/A	A/A	A/A	A/A	A/A	A/A	A/A	G/G	G/G	A/A	G/G	A/A	A/A
Pv10	43070388	ANNZ01035253-1_2497	T	C	.	T/T	T/T	T/T	T/T	T/T	T/T	T/T	T/T	T/T	T/T	T/T	T/T	T/T	T/T	T/T	T/T	T/T	T/T	T/T	T/T	T/T	T/T	T/T	T/T	T/T	C/C	T/T	T/T	T/T	T/T	T/T	T/T	T/T	T/T	T/T	T/T	T/T	T/T	C/C	T/T	T/T	T/T	T/T	T/T
Pv10	43213221	ANNZ01035257-1_58947	C	A	.	C/C	C/C	C/C	C/C	C/C	C/C	C/C	C/C	C/C	C/C	C/C	C/C	C/C	C/C	C/C	C/C	C/C	C/C	C/C	C/C	C/C	C/C	C/C	C/C	C/C	C/C	C/C	C/C	C/C	C/C	C/C	C/C	C/C	C/C	C/C	A/A	C/C	C/C	C/C	C/C	C/C	C/C	C/C	C/C
Pv11	390735	ANNZ01035274-1_217268	T	C	.	T/T	T/T	T/C	T/T	C/C	C/C	T/T	C/C	C/C	C/C	C/C	C/C	C/C	C/C	C/C	T/T	T/T	T/T	C/C	C/C	C/C	T/T	C/C	C/C	T/T	C/C	C/C	C/C	C/C	T/T	C/C	C/C	C/C	C/C	C/C	T/T	T/T	T/T	C/C	T/T	C/C	T/T	C/C	C/C
Pv11	772127	ANNZ01035287-1_49448	C	A	.	C/C	.	C/C	C/C	C/C	C/C	C/C	C/C	C/C	C/C	C/C	C/C	C/C	C/C	C/C	C/C	C/C	C/C	C/C	C/C	C/C	C/C	C/C	C/C	.	C/C	C/C	C/C	C/C	C/C	C/C	C/C	C/C	C/C	C/C	A/A	.	.	C/C	C/C	C/C	C/C	C/C	C/C
Pv11	1176907	ANNZ01035303-1_26251	A	C	.	C/C	C/C	A/A	A/A	C/C	C/C	C/C	C/C	A/C	C/C	C/C	C/C	C/C	C/C	A/A	A/A	C/C	C/C	C/C	C/C	C/C	A/A	C/C	C/C	C/C	C/C	A/A	A/A	C/C	A/A	C/C	C/C	C/C	C/C	C/C	A/A	C/C	C/C	A/A	A/A	C/C	A/A	C/C	C/C
Pv11	1573300	ANNZ01035310-1_42190	G	A	.	G/G	G/G	A/A	G/G	G/G	G/G	A/A	G/G	G/A	G/G	G/G	G/G	G/G	A/A	A/A	G/G	A/A	A/A	G/G	G/G	G/G	G/G	G/G	G/G	G/G	A/A	A/A	A/A	G/G	G/G	G/G	G/G	G/G	G/G	G/G	G/G	G/G	G/G	A/A	A/A	G/G	G/G	G/G	G/G
Pv11	1987729	ANNZ01035319-1_10552	A	G	.	A/A	A/A	A/A	A/A	G/G	G/G	A/A	A/G	A/G	G/G	G/G	G/G	A/A	A/A	A/A	A/A	A/A	A/A	G/G	G/G	G/G	G/G	G/G	G/G	A/A	A/A	A/A	A/A	G/G	A/A	G/G	G/G	G/G	A/A	G/G	A/A	A/A	A/A	A/A	A/A	G/G	A/A	G/G	A/A
Pv11	2018709	ANNZ01035319-1_41532	T	G	.	T/T	.	T/T	T/T	G/G	G/G	G/G	T/G	T/G	G/G	G/G	G/G	T/T	T/T	T/T	T/T	G/G	G/G	G/G	G/G	G/G	G/G	G/G	G/G	.	T/T	T/T	T/T	G/G	T/T	G/G	G/G	G/G	T/T	G/G	T/T	.	.	T/T	T/T	G/G	T/T	G/G	T/T
Pv11	2694651	ANNZ01035347-1_66572	G	A	.	G/G	G/G	G/G	G/G	G/G	G/G	G/G	G/G	G/G	G/G	G/G	G/G	G/G	G/G	G/G	G/G	G/G	G/G	G/G	G/G	G/G	G/G	G/G	G/G	G/G	G/G	G/G	G/G	G/G	G/G	G/G	G/G	G/G	G/G	G/G	G/G	G/G	G/G	G/G	G/G	G/G	G/G	G/G	G/G
Pv11	3190094	ANNZ01035357-1_7824	T	C	.	T/C	.	C/C	C/C	T/T	T/T	.	T/T	T/C	T/T	T/T	T/T	T/T	C/C	C/C	C/C	T/T	T/T	T/T	T/T	T/T	T/T	T/T	T/T	.	C/C	C/C	C/C	T/T	C/C	T/T	T/T	T/T	T/T	T/T	C/C	.	.	C/C	C/C	T/T	C/C	T/T	C/C
Pv11	3598730	ANNZ01035362-1_226225	G	A	.	G/G	.	G/G	A/A	G/G	G/G	A/A	G/G	G/G	G/G	G/G	G/G	G/G	A/A	G/G	A/A	G/G	G/G	G/G	G/G	G/G	G/G	G/G	G/G	.	A/A	G/G	G/G	G/G	A/A	G/G	G/G	G/G	G/G	G/G	A/A	.	.	G/G	A/A	G/G	A/A	G/G	G/G
Pv11	3969525	ANNZ01035372-1_111147	G	A	.	.	.	.	.	A/A	A/A	.	G/G	G/G	G/G	G/G	G/G	G/G	A/A	.	.	A/A	A/A	G/G	G/G	G/G	G/G	G/G	G/G	.	.	.	.	G/G	.	G/G	G/G	G/G	G/G	G/G	.	.	.	.	.	G/G	.	G/G	G/G
Pv11	4312595	ANNZ01035379-1_22081	A	G	.	A/A	A/A	A/A	A/A	A/A	A/A	A/A	A/G	A/A	A/A	A/A	A/A	A/A	A/A	A/A	A/A	A/A	A/A	A/A	A/G	A/A	A/A	A/A	A/A	A/A	A/A	A/A	A/A	A/A	A/A	A/A	A/A	A/A	G/G	A/A	A/A	A/A	A/A	A/A	A/A	A/A	A/A	A/A	A/A
Pv11	4755741	ANNZ01035392-1_15658	T	C	.	.	.	.	.	.	T/T	.	T/C	T/T	T/T	.	T/T	T/T	C/C	.	.	.	.	C/C	T/C	T/T	T/T	.	T/T	.	.	.	.	C/C	.	C/C	T/T	T/T	C/C	C/C	.	.	.	.	.	C/C	.	T/T	T/T
Pv11	5196009	ANNZ01035426-1_6351	T	C	.	T/T	C/C	C/C	C/C	C/C	C/C	T/T	C/C	C/C	T/T	C/C	C/C	C/C	C/C	C/C	C/C	T/T	T/T	T/T	T/C	T/T	T/T	C/C	C/C	C/C	C/C	C/C	T/T	T/T	C/C	T/T	C/C	C/C	T/T	T/T	C/C	C/C	C/C	C/C	C/C	T/T	C/C	C/C	C/C
Pv11	5536505	ANNZ01035437-1_17794	T	G	.	T/T	.	T/T	T/T	G/G	G/G	T/T	T/G	T/T	T/T	T/T	T/T	G/G	T/T	T/T	T/T	T/T	T/T	G/G	T/G	T/T	T/T	T/T	T/T	.	T/T	T/T	T/T	G/G	T/T	G/G	T/T	T/T	T/T	T/T	T/T	.	.	T/T	T/T	G/G	T/T	T/T	T/T
Pv11	5710436	ANNZ01035441-1_22875	C	T	.	C/C	C/C	T/T	T/T	C/C	C/C	C/C	C/C	C/C	C/C	C/C	C/C	C/C	C/C	T/T	C/C	C/C	C/C	C/C	C/C	C/C	C/C	C/C	C/C	C/C	C/C	C/C	C/C	C/C	T/T	C/C	C/C	C/C	C/C	C/C	C/C	C/C	C/C	T/T	C/C	C/C	T/T	C/C	C/C
Pv11	6121719	ANNZ01035465-1_23846	G	A	.	G/G	.	G/G	G/G	.	G/G	.	G/G	G/G	G/G	G/G	G/G	G/G	A/A	G/G	A/A	G/G	G/G	G/G	G/G	G/G	G/G	G/G	G/G	.	G/G	A/A	G/G	G/G	G/G	G/G	G/G	G/G	G/G	G/G	A/A	.	.	G/G	G/G	G/G	G/G	G/G	G/G
Pv11	6747983	ANNZ01035494-1_1684	C	T	.	.	.	.	.	C/C	C/C	.	C/C	C/C	C/C	C/C	C/C	C/C	.	C/C	.	.	.	C/C	C/C	C/C	C/C	C/C	C/C	.	.	.	.	C/C	.	C/C	C/C	C/C	C/C	.	.	.	.	.	.	C/C	.	C/C	C/C
Pv11	7406546	ANNZ01035537-1_69566	C	T	.	T/T	.	C/C	C/C	C/C	C/C	T/T	C/C	C/C	C/C	C/C	C/C	C/C	C/C	C/C	C/C	T/T	T/T	C/C	C/C	C/C	C/C	C/C	C/C	.	C/C	C/C	C/C	C/C	C/C	C/C	C/C	C/C	C/C	T/T	C/C	.	.	C/C	C/C	C/C	C/C	C/C	C/C
Pv11	7850941	ANNZ01035555-1_12715	A	G	.	A/A	.	G/G	G/G	A/A	A/A	A/A	A/A	A/A	A/A	A/A	A/A	A/A	A/A	G/G	G/G	A/A	A/A	A/A	A/A	A/A	A/A	A/A	A/A	.	A/A	G/G	G/G	A/A	G/G	A/A	A/A	A/A	A/A	A/A	G/G	.	.	A/G	G/G	A/A	G/G	A/A	A/A
Pv11	8322838	ANNZ01035581-1_10812	A	G	.	A/A	.	G/G	G/G	A/A	A/A	A/A	A/A	A/A	A/A	A/A	A/A	A/A	G/G	G/G	G/G	A/A	A/A	A/A	A/A	A/A	A/A	A/A	A/A	.	G/G	G/G	G/G	A/A	G/G	A/A	A/A	A/A	A/A	A/A	G/G	.	.	G/G	G/G	A/A	G/G	A/A	A/A
Pv11	8792423	ANNZ01035604-1_22483	C	A	.	C/C	.	C/C	C/C	C/C	C/C	A/A	C/C	C/C	C/C	C/C	C/C	C/C	C/C	C/C	C/C	A/A	A/A	C/C	C/C	C/C	C/C	C/C	C/C	.	C/C	C/C	C/C	C/C	C/C	C/C	C/C	C/C	C/C	C/C	C/C	.	.	C/C	C/C	C/C	C/C	C/C	C/C
Pv11	9133462	ANNZ01035624-1_25196	C	T	.	C/C	.	C/C	C/C	C/C	C/C	C/C	C/C	C/C	C/C	C/C	C/C	C/C	C/C	C/C	C/C	C/C	C/C	C/C	C/C	C/C	C/C	C/C	C/C	.	C/C	C/C	C/C	C/C	C/C	C/C	C/C	C/C	C/C	C/C	C/C	.	.	C/C	C/C	C/C	C/C	C/C	C/C
Pv11	9376953	ANNZ01035638-1_26264	G	A	.	G/G	.	G/G	G/G	G/G	G/G	G/G	G/A	G/G	G/G	G/G	G/G	G/G	G/G	G/G	G/G	G/G	G/G	A/A	G/G	G/G	A/A	G/G	G/G	.	G/G	G/G	G/G	G/G	G/G	A/A	G/G	G/G	A/A	G/G	G/G	.	.	G/G	G/G	G/G	G/G	A/A	G/G
Pv11	9977250	ANNZ01035679-1_58201	T	C	.	C/C	T/T	T/T	T/T	T/T	T/T	C/C	T/T	T/T	T/T	T/T	T/T	T/T	T/T	T/T	T/T	C/C	C/C	T/T	T/T	T/T	T/T	T/T	T/T	T/T	T/T	T/T	T/T	T/T	T/T	T/T	T/T	T/T	T/T	T/T	T/T	T/T	T/T	T/T	T/T	T/T	T/T	T/T	T/T
Pv11	10263158	ANNZ01035697-1_8431	A	G	.	G/G	.	A/A	A/A	A/A	A/A	G/G	A/A	A/A	A/A	A/A	A/A	A/A	A/A	A/A	A/A	G/G	G/G	A/A	A/A	A/A	A/A	A/A	A/A	.	A/A	A/A	A/A	A/A	A/A	A/A	A/A	A/A	A/A	A/A	A/A	.	.	A/A	A/A	A/A	A/A	A/A	A/A
Pv11	11109928	ANNZ01035748-1_24240	A	G	.	A/A	.	G/G	G/G	A/A	A/A	A/A	A/A	A/A	A/A	A/A	A/A	A/A	G/G	G/G	G/G	A/A	A/A	A/A	A/A	A/A	A/A	A/A	A/A	.	A/A	G/G	G/G	A/A	G/G	A/A	A/A	A/A	A/A	A/A	G/G	.	.	G/G	G/G	A/A	G/G	A/A	A/A
Pv11	11707784	ANNZ01035796-1_10815	A	G	.	A/A	.	G/G	G/G	A/A	A/A	A/A	A/A	A/A	A/A	A/A	A/A	A/A	G/G	G/G	G/G	A/A	A/A	A/A	A/A	A/A	A/A	A/A	A/A	.	A/A	G/G	G/G	A/A	G/G	A/A	A/A	A/A	A/A	A/A	G/G	.	.	G/G	G/G	A/A	G/G	A/A	A/A
Pv11	12292380	ANNZ01035835-1_37215	G	A	.	G/G	.	G/A	G/A	A/A	G/G	G/G	G/G	A/A	G/G	A/A	A/A	G/G	G/A	G/A	G/A	G/G	G/G	G/G	G/A	G/G	G/G	A/A	A/A	.	G/G	G/A	G/A	G/G	G/G	G/G	A/A	G/G	G/A	G/G	G/A	.	.	G/A	G/A	G/G	G/G	G/G	A/A
Pv11	12430558	ANNZ01035837-1_12765	T	C	.	C/C	.	C/C	C/C	C/C	C/C	C/C	T/T	C/C	T/T	C/C	C/C	C/C	C/C	C/C	C/C	C/C	C/C	T/T	T/C	T/T	T/T	C/C	C/C	.	.	C/C	C/C	T/T	C/C	T/T	C/C	C/C	C/C	T/T	C/C	.	.	C/C	C/C	C/C	C/C	T/T	C/C
Pv11	13198536	ANNZ01035897-1_8534	T	C	.	C/C	.	C/C	C/C	.	.	C/C	T/T	T/T	T/T	T/T	T/T	T/T	C/C	C/C	C/C	C/C	C/C	T/T	T/T	T/T	T/T	T/T	T/T	.	.	C/C	C/C	T/T	C/C	T/T	T/T	T/T	C/C	T/T	C/C	.	.	C/C	C/C	T/T	C/C	T/T	T/T
Pv11	13288474	ANNZ01035903-1_20288	T	G	.	G/G	.	G/G	G/G	T/T	T/T	G/G	T/T	T/T	T/T	T/T	T/T	T/T	G/G	G/G	G/G	G/G	G/G	T/T	T/T	T/T	T/T	T/T	T/T	.	T/T	G/G	G/G	T/T	G/G	T/T	T/T	T/T	G/G	T/T	G/G	.	.	G/G	G/G	T/T	G/G	T/T	T/T
Pv11	13903039	ANNZ01035974-1_22586	G	A	.	A/A	A/A	A/A	A/A	G/G	A/A	A/A	G/G	G/G	G/G	G/G	G/G	A/A	A/A	A/A	A/A	A/A	A/A	G/G	G/G	G/G	G/G	G/G	G/G	A/A	A/A	A/A	A/A	G/G	A/A	G/G	G/G	A/A	A/A	G/G	A/A	A/A	A/A	A/A	A/A	A/A	A/A	G/G	G/G
Pv11	14245278	ANNZ01036003-1_72225	G	T	.	.	.	.	G/T	.	.	.	.	.	.	.	.	.	.	.	.	.	.	.	.	.	.	.	.	.	.	.	.	.	T/T	.	.	.	.	.	.	.	.	.	.	.	.	.	.
Pv11	14765265	ANNZ01036033-1_29982	G	T	.	T/T	.	T/T	T/T	G/G	G/G	T/T	G/G	G/G	G/G	G/G	G/G	G/G	T/T	T/T	T/T	T/T	T/T	G/G	G/G	G/G	G/G	G/G	G/G	.	G/G	T/T	T/T	G/G	T/T	G/G	G/G	G/G	T/T	G/G	T/T	.	.	T/T	T/T	G/G	T/T	G/G	G/G
Pv11	15145878	ANNZ01036061-1_18262	C	T	.	T/T	.	T/T	T/T	C/C	C/C	T/T	C/C	C/C	C/C	C/C	C/C	C/C	T/T	T/T	T/T	T/T	T/T	C/C	C/C	C/C	C/C	C/C	C/C	.	T/T	T/T	T/T	C/C	T/T	C/C	C/C	C/C	T/T	C/C	T/T	.	.	T/T	T/T	C/C	T/T	C/C	C/C
Pv11	15487621	ANNZ01036089-1_7998	C	T	.	T/T	.	T/T	T/T	C/C	C/C	T/T	C/C	C/C	C/C	C/C	C/C	C/C	T/T	T/T	T/T	T/T	T/T	C/C	C/C	C/C	C/C	C/C	C/C	.	T/T	T/T	T/T	C/C	T/T	C/C	C/C	C/C	T/T	C/C	T/T	.	.	T/T	T/T	C/C	T/T	C/C	C/C
Pv11	15645079	ANNZ01036104-1_15124	A	G	.	G/G	A/A	G/G	G/G	A/A	A/A	G/G	A/A	A/A	A/A	A/A	A/A	A/A	G/G	G/G	G/G	G/G	G/G	A/A	A/A	A/A	A/A	A/A	A/A	A/A	A/A	G/G	G/G	A/A	G/G	A/A	A/A	A/A	G/G	A/A	G/G	A/G	A/G	G/G	G/G	A/A	G/G	A/A	A/A
Pv11	16745170	ANNZ01036303-1_2305	G	T	.	T/T	.	T/T	T/T	G/G	G/G	T/T	G/G	G/G	G/G	G/G	G/G	G/G	T/T	T/T	T/T	T/T	T/T	G/G	G/G	G/G	G/G	G/G	G/G	.	T/T	T/T	T/T	G/G	T/T	G/G	G/G	G/G	T/T	G/G	T/T	.	.	T/T	T/T	G/G	T/T	G/G	G/G
Pv11	17698364	ANNZ01036447-1_14305	G	A	.	A/A	.	A/A	A/A	G/G	G/G	A/A	G/G	G/G	.	G/G	G/G	G/G	A/A	.	A/A	A/A	A/A	G/G	G/G	.	.	G/G	G/G	.	A/A	A/A	A/A	.	A/A	G/G	G/G	G/G	A/A	G/G	A/A	.	.	A/A	A/A	G/G	A/A	G/G	G/G
Pv11	18204038	ANNZ01036501-1_9612	C	A	.	A/A	.	C/A	A/A	C/C	C/C	A/A	C/C	C/C	C/C	C/C	C/C	C/C	A/A	C/C	A/A	A/A	A/A	C/C	C/C	C/C	C/C	C/C	C/C	.	A/A	C/A	A/A	C/C	A/A	C/C	C/C	C/C	A/A	C/C	A/A	.	.	C/A	A/A	C/C	A/A	C/C	C/C
Pv11	18659802	ANNZ01036550-1_59854	G	A	.	A/A	A/A	A/A	A/A	G/G	G/G	A/A	G/G	G/G	G/G	G/G	G/G	G/G	A/A	A/A	A/A	A/A	A/A	G/G	G/G	G/G	G/G	G/G	G/G	A/A	A/A	A/A	A/A	G/G	A/A	G/G	G/G	G/G	A/A	G/G	A/A	A/A	A/A	A/A	A/A	G/G	A/A	G/G	G/G
Pv11	19597888	ANNZ01036659-1_41290	A	G	.	G/G	.	G/G	G/G	A/A	G/G	G/G	A/G	A/A	G/G	A/A	A/A	G/G	G/G	G/G	G/G	G/G	G/G	A/A	A/G	G/G	G/G	A/A	A/A	.	G/G	G/G	G/G	G/G	G/G	A/A	A/A	G/G	G/G	A/A	G/G	.	.	G/G	G/G	G/G	G/G	A/A	A/A
Pv11	19777047	ANNZ01036677-1_36859	G	A	.	A/A	.	A/A	A/A	G/G	G/G	A/A	G/G	G/G	G/G	G/G	G/G	G/G	A/A	A/A	A/A	A/A	A/A	G/G	G/G	G/G	G/G	G/G	G/G	.	A/A	A/A	A/A	G/G	A/A	G/G	G/G	G/G	A/A	G/G	A/A	.	.	A/A	A/A	G/G	A/A	G/G	G/G
Pv11	20737974	ANNZ01036860-1_6299	C	T	.	T/T	.	T/T	T/T	C/C	C/C	T/T	C/C	C/C	C/C	C/C	C/C	C/C	T/T	T/T	T/T	T/T	T/T	C/C	C/C	C/C	C/C	C/C	C/C	.	C/C	T/T	T/T	C/C	T/T	C/C	C/C	C/C	T/T	C/C	T/T	.	.	T/T	T/T	C/C	T/T	C/C	C/C
Pv11	21048676	ANNZ01036925-1_5889	T	C	.	C/C	C/C	C/C	C/C	T/T	T/T	C/C	T/T	T/T	T/T	T/T	T/T	T/T	C/C	C/C	C/C	C/C	C/C	T/T	T/T	T/T	T/T	T/T	T/T	C/C	C/C	C/C	C/C	T/T	C/C	T/T	T/T	T/T	C/C	T/T	C/C	C/C	C/C	C/C	C/C	T/T	C/C	T/T	T/T
Pv11	23364079	ANNZ01037318-1_14842	C	T	.	T/T	.	C/T	T/T	C/C	C/C	T/T	C/C	C/C	C/C	C/C	C/C	C/C	T/T	C/C	T/T	T/T	T/T	C/C	C/C	C/C	C/C	C/C	C/C	.	T/T	C/T	T/T	C/C	T/T	C/C	C/C	C/C	T/T	C/C	T/T	.	.	C/T	T/T	C/C	T/T	C/C	C/C
Pv11	24604468	ANNZ01037556-1_6469	C	T	.	T/T	.	C/T	T/T	C/C	C/C	T/T	C/C	C/C	C/C	C/C	C/C	C/C	T/T	C/C	T/T	T/T	T/T	C/C	C/C	C/C	C/C	C/C	C/C	.	.	C/T	T/T	C/C	T/T	C/C	C/C	C/C	T/T	C/C	T/T	.	.	C/T	T/T	C/C	T/T	C/C	C/C
Pv11	25774271	ANNZ01037759-1_35911	T	C	.	C/C	.	T/C	C/C	T/T	T/T	C/C	T/T	T/T	T/T	T/T	T/T	T/T	C/C	T/T	C/C	C/C	C/C	T/T	T/T	T/T	T/T	T/T	T/T	.	C/C	T/C	C/C	T/T	C/C	T/T	T/T	T/T	C/C	T/T	C/C	.	.	T/C	C/C	T/T	C/C	T/T	T/T
Pv11	26307495	ANNZ01037841-1_5220	C	A	.	A/A	.	C/A	A/A	C/C	C/C	A/A	C/C	C/C	C/C	C/C	C/C	C/C	A/A	C/C	A/A	A/A	A/A	C/C	C/C	C/C	C/C	C/C	C/C	.	A/A	C/A	A/A	C/C	A/A	C/C	C/C	C/C	A/A	C/C	A/A	C/A	.	C/C	A/A	C/C	A/A	C/C	C/C
Pv11	26732127	ANNZ01037880-1_1631	A	G	.	G/G	.	A/G	G/G	A/A	A/A	G/G	A/A	A/A	A/A	A/A	A/A	A/A	G/G	A/A	G/G	G/G	G/G	A/A	A/A	A/A	A/A	A/A	A/A	.	G/G	A/G	G/G	A/A	G/G	A/A	A/A	A/A	G/G	A/A	G/G	.	.	A/G	G/G	A/A	G/G	A/A	A/A
Pv11	26852941	ANNZ01037885-1_86685	A	G	.	G/G	.	A/G	G/G	A/A	A/A	G/G	A/A	A/A	A/A	A/A	A/A	A/A	G/G	A/A	G/G	G/G	G/G	A/A	A/A	A/A	A/A	A/A	A/A	.	G/G	A/G	G/G	A/A	G/G	A/A	A/A	A/A	G/G	A/A	G/G	.	.	A/G	G/G	A/A	G/G	A/A	A/A
Pv11	27357695	ANNZ01037933-1_21217	G	A	.	G/G	G/A	G/G	G/G	G/G	G/G	G/G	G/G	G/G	G/G	G/G	G/G	G/G	G/G	G/G	G/G	G/G	G/G	G/G	G/G	G/G	G/G	G/G	G/G	G/G	G/G	G/G	G/G	G/G	G/G	G/G	G/G	G/G	G/G	G/G	G/G	.	G/G	G/G	G/G	G/G	G/G	G/G	G/G
Pv11	32729914	ANNZ01038513-1_24918	C	T	.	C/C	.	C/T	T/T	C/C	C/C	T/T	C/C	C/C	C/C	C/C	C/C	C/C	C/C	C/C	T/T	T/T	T/T	C/C	C/C	C/C	C/C	C/C	C/C	.	C/C	C/T	T/T	C/C	C/C	C/C	C/C	C/C	T/T	C/C	T/T	.	.	C/C	T/T	C/C	C/C	C/C	C/C
Pv11	34214854	ANNZ01038664-1_10257	G	T	.	G/G	.	T/T	T/T	G/G	G/G	T/T	G/G	G/G	G/G	G/G	G/G	G/G	G/G	T/T	T/T	T/T	T/T	G/G	G/G	G/G	G/G	G/G	G/G	.	T/T	T/T	T/T	G/G	G/G	G/G	G/G	G/G	T/T	G/G	T/T	.	.	G/T	T/T	G/G	G/G	G/G	G/G
Pv11	36754570	ANNZ01039048-1_5338	A	G	.	.	.	G/G	G/G	A/A	A/A	G/G	A/A	A/A	A/A	A/A	A/A	A/A	G/G	G/G	G/G	G/G	G/G	A/A	A/A	A/A	A/A	A/A	A/A	.	G/G	G/G	G/G	A/A	G/G	A/A	A/A	A/A	G/G	A/A	G/G	.	.	G/G	G/G	A/A	G/G	A/A	A/A
Pv11	37948982	ANNZ01039176-1_2254	A	G	.	G/G	.	G/G	G/G	A/A	A/A	G/G	A/A	A/A	A/A	A/A	A/A	A/A	A/A	G/G	G/G	G/G	G/G	A/A	A/A	A/A	A/A	A/A	A/A	.	G/G	G/G	G/G	A/A	A/A	A/A	A/A	A/A	G/G	A/A	G/G	.	.	A/G	G/G	A/A	A/A	A/A	A/A
Pv11	38626835	ANNZ01039265-1_51363	C	T	.	T/T	.	T/T	T/T	C/C	C/C	C/C	C/C	C/C	C/C	C/C	C/C	C/C	C/C	T/T	T/T	C/C	C/C	C/C	C/C	C/C	C/C	C/C	C/C	.	C/C	T/T	T/T	C/C	C/C	C/C	C/C	C/C	T/T	C/C	T/T	.	.	C/T	T/T	C/C	C/C	C/C	C/C
Pv11	39154508	ANNZ01039306-1_11046	C	T	.	C/C	.	T/T	T/T	C/C	C/C	T/T	C/C	C/C	C/C	C/C	C/C	C/C	C/C	T/T	T/T	T/T	T/T	C/C	C/C	C/C	C/C	C/C	C/C	.	T/T	T/T	T/T	C/C	C/C	C/C	C/C	C/C	T/T	C/C	T/T	.	.	C/T	T/T	C/C	C/C	C/C	C/C
Pv11	39448403	ANNZ01039335-1_3831	C	A;T	.	T/T	A/A	T/T	T/T	C/C	C/C	T/T	C/C	C/C	C/C	C/C	C/C	C/C	T/T	T/T	T/T	T/T	T/T	C/C	C/C	C/C	C/C	C/C	C/C	A/A	T/T	T/T	T/T	C/C	T/T	C/C	C/C	C/C	T/T	C/C	T/T	A/A	A/A	T/T	T/T	C/C	T/T	C/C	C/C
Pv11	39794783	ANNZ01039358-1_10133	C	T	.	C/C	.	T/T	T/T	C/C	C/C	T/T	C/C	C/C	C/C	C/C	C/C	C/C	T/T	T/T	T/T	T/T	T/T	C/C	C/C	C/C	C/C	C/C	C/C	.	T/T	T/T	T/T	C/C	C/C	C/C	C/C	C/C	T/T	C/C	T/T	.	.	C/T	T/T	C/C	C/C	C/C	C/C
Pv11	40105376	ANNZ01039371-1_2313	A	G	.	A/A	.	G/G	G/G	A/A	A/A	G/G	A/A	A/A	A/A	A/A	A/A	A/A	A/A	G/G	G/G	G/G	G/G	A/A	A/A	A/A	A/A	A/A	A/A	.	A/A	G/G	G/G	A/A	A/A	A/A	A/A	A/A	G/G	A/A	G/G	.	.	A/G	G/G	A/A	A/A	A/A	A/A
Pv11	41111397	ANNZ01039441-1_47490	C	T	.	C/C	.	T/T	T/T	C/C	C/C	T/T	C/C	C/C	C/C	C/C	C/C	C/C	C/C	T/T	T/T	T/T	T/T	C/C	C/C	C/C	C/C	C/C	C/C	.	C/C	T/T	T/T	C/C	C/C	C/C	C/C	C/C	T/T	C/C	T/T	.	.	C/T	T/T	C/C	C/C	C/C	C/C
Pv11	41599939	ANNZ01039463-1_69259	G	A	.	A/A	A/A	A/A	A/A	G/G	G/G	A/A	G/G	G/G	G/G	G/G	G/G	G/G	A/A	A/A	A/A	A/A	A/A	G/G	G/G	G/G	G/G	G/G	G/G	A/A	A/A	A/A	A/A	G/G	A/A	G/G	G/G	G/G	A/A	G/G	A/A	A/A	A/A	A/A	A/A	G/G	A/A	G/G	G/G
Pv11	41896326	ANNZ01039473-1_22270	A	G	.	A/A	.	.	.	A/A	A/A	.	A/A	A/A	A/A	A/A	A/A	A/A	.	.	.	.	.	A/A	A/A	A/A	A/A	A/A	A/A	.	.	.	.	A/A	.	A/A	A/A	A/A	.	A/A	.	.	.	.	.	A/A	.	A/A	A/A
Pv11	42232754	ANNZ01039490-1_58705	G	A	.	G/G	.	.	.	G/G	.	G/G	.	G/G	.	G/G	G/G	A/A	G/G	G/G	.	G/G	G/G	.	G/G	A/A	.	G/G	G/G	.	G/G	G/G	G/G	.	G/G	G/A	G/G	A/A	.	.	.	.	.	G/G	.	.	G/G	.	G/G
Pv11	42708131	ANNZ01039508-1_17410	A	C	.	.	.	.	.	A/A	.	.	.	A/A	.	A/A	A/A	.	.	.	.	.	.	.	A/A	.	.	A/A	A/A	.	.	.	.	.	.	A/C	A/A	.	.	.	.	.	.	.	.	.	.	.	A/A
Pv11	43233210	ANNZ01039538-1_1972	C	T	.	T/T	C/C	C/C	C/C	C/C	T/T	T/T	T/T	C/C	T/T	C/C	C/C	T/T	C/C	C/C	C/C	T/T	T/T	T/T	C/T	T/T	C/C	C/C	C/C	C/C	C/C	C/C	C/C	T/T	T/T	T/T	C/C	T/T	T/T	T/T	C/C	C/C	C/C	C/C	C/C	T/T	T/T	T/T	C/C
Pv11	43863181	ANNZ01039579-1_34993	A	G	.	A/A	.	G/G	G/G	A/A	A/A	G/G	A/A	A/A	A/A	A/A	A/A	A/A	G/G	G/G	G/G	A/A	A/A	A/A	A/A	A/A	G/G	A/A	A/A	.	G/G	G/G	G/G	A/A	G/G	A/A	A/A	A/A	G/G	A/A	G/G	.	.	G/G	G/G	A/A	G/G	A/A	A/A
Pv11	44671061	ANNZ01039636-1_70526	A	C	.	C/C	.	C/C	C/C	A/A	A/A	C/C	A/A	A/A	A/A	A/A	A/A	A/A	A/A	C/C	C/C	C/C	C/C	A/A	A/A	A/A	C/C	A/A	A/A	.	C/C	C/C	C/C	A/A	C/C	A/A	A/A	A/A	A/A	A/A	C/C	A/C	.	C/C	C/C	A/A	C/C	A/A	A/A
Pv11	45178311	ANNZ01039658-1_9681	G	A	.	G/G	G/G	G/A	A/A	G/G	G/G	A/A	G/G	G/G	G/G	G/G	G/G	G/G	G/G	A/A	A/A	G/G	G/G	G/G	G/G	G/G	A/A	G/G	G/G	G/G	G/G	A/A	G/G	G/G	G/G	G/G	G/G	G/G	G/G	G/G	A/A	G/G	G/G	A/A	A/A	G/G	A/A	G/G	G/G
Pv11	45505286	ANNZ01039671-1_14042	C	A	.	A/A	.	C/C	C/C	C/C	C/C	C/C	C/A	C/C	C/C	C/C	C/C	C/C	A/A	C/C	C/C	C/C	A/A	C/C	C/C	C/C	C/C	C/C	C/C	.	C/C	C/C	C/C	C/C	C/C	C/C	C/C	C/C	C/C	C/C	C/C	.	.	C/C	C/C	C/C	C/C	C/C	C/C
Pv11	45828794	ANNZ01039687-1_2980	G	A	.	G/G	G/G	A/A	A/A	G/G	G/G	A/A	G/G	G/G	G/G	G/G	G/G	G/G	A/A	G/A	A/A	G/G	A/A	G/G	G/G	G/G	G/G	G/G	G/G	G/G	G/G	A/A	A/A	G/G	G/G	G/G	G/G	G/G	G/G	G/G	A/A	G/G	G/G	G/A	A/A	G/G	A/A	G/G	G/G
Pv11	46209372	ANNZ01039715-1_10694	C	A	.	C/C	A/A	C/C	A/A	A/A	A/A	A/A	C/A	A/A	A/A	A/A	A/A	A/A	C/C	C/A	A/A	C/C	C/C	A/A	A/A	A/A	A/A	A/A	A/A	A/A	A/A	A/A	C/C	A/A	C/C	A/A	A/A	A/A	A/A	A/A	A/A	A/A	A/A	C/A	C/C	A/A	A/A	A/A	A/A
Pv11	46613479	ANNZ01039732-1_34348	T	G	.	T/T	T/T	G/G	G/G	T/T	T/T	G/G	T/G	T/T	T/T	T/T	T/T	T/T	G/G	T/G	G/G	T/T	T/T	T/T	T/T	T/T	T/T	T/T	T/T	T/G	G/G	G/G	G/G	T/T	T/T	T/T	T/T	T/T	T/T	G/G	G/G	T/G	T/T	T/G	G/G	T/T	G/G	T/T	T/T
Pv11	46667862	ANNZ01039734-1_32125	C	T	.	C/C	.	C/C	T/T	C/C	C/C	C/C	C/C	C/C	C/C	C/C	C/C	C/C	C/C	C/C	T/T	C/C	C/C	C/C	C/C	C/C	C/C	C/C	C/C	.	T/T	T/T	C/C	C/C	C/C	C/C	C/C	C/C	C/C	C/C	T/T	.	.	C/C	C/C	C/C	C/C	C/C	C/C
Pv11	47398473	ANNZ01039785-1_18579	A	G	.	A/A	A/A	A/A	G/G	A/A	A/A	A/A	A/A	A/A	A/A	A/A	A/A	A/A	A/A	A/A	G/G	A/A	A/A	A/A	A/A	A/A	A/A	A/A	A/A	A/A	A/A	A/G	A/A	A/A	A/A	A/A	A/A	A/A	A/A	G/G	G/G	A/A	A/A	A/A	A/A	A/A	A/A	A/A	A/A
Pv11	48163216	ANNZ01039832-1_19269	A	G;T	.	G/G	G/G	G/G	A/A	A/A	A/A	A/A	A/G	A/A	A/A	A/A	A/A	A/A	A/A	G/G	A/A	A/A	A/A	A/A	A/A	A/A	A/A	A/A	A/A	G/G	G/G	A/G	G/G	A/A	G/G	A/A	A/A	A/A	A/A	G/G	A/A	G/G	G/G	G/G	G/G	A/A	G/G	A/A	A/A
Pv11	48621346	ANNZ01039864-1_7475	G	A;T	.	T/T	.	G/G	G/G	G/G	G/G	G/G	G/G	G/G	G/G	G/G	G/G	G/G	T/T	G/G	G/G	G/G	G/G	G/G	G/G	G/G	G/G	G/G	G/G	G/G	T/T	G/G	G/G	T/T	T/T	G/G	G/G	G/G	G/G	T/T	G/G	.	.	G/G	G/G	G/G	T/T	G/G	G/G
Pv11	49341358	ANNZ01039909-1_19089	A	G	.	A/A	G/G	G/G	G/G	A/A	A/A	G/G	A/A	A/A	A/A	A/A	A/A	A/A	G/G	G/G	G/G	G/G	G/G	A/A	A/A	A/A	A/A	A/A	A/A	G/G	G/G	G/G	G/G	G/G	G/G	A/A	A/A	A/A	A/A	G/G	G/G	G/G	G/G	G/G	G/G	A/A	G/G	A/A	A/A
Pv11	49718768	ANNZ01039935-1_29582	A	G	.	G/G	G/G	G/G	G/G	A/A	A/A	G/G	A/G	A/A	A/A	A/A	A/A	A/A	G/G	G/G	G/G	G/G	G/G	A/A	A/A	A/A	A/A	A/A	A/A	G/G	G/G	G/G	G/G	A/A	G/G	A/A	A/A	A/A	A/A	A/A	G/G	G/G	G/G	G/G	G/G	A/A	G/G	A/A	A/A
[truncated: 159 more columns]
